# Supplementary material for: Discovery of Novel Natural Product-Derived EGFR Inhibitors Using Multiple Linear Regression, Stacked Ensemble Regression, and Fingerprinting Approaches
Source: Research Square preprint supplement (doi:10.21203/rs.3.rs-7104591/v1), 2025-09-19
Supplement: Supplementary file 1 [file 0015f226a88b2d923bec2d07.xlsx]

## Sheet: Sheet1
				Supplementary File
Discovery of Novel Natural Product-Derived EGFR Inhibitors Using Multiple Linear Regression, Stacked Ensemble Regression, and Fingerprinting Approaches

## Sheet: S1
BindingDB Reactant_set_id	Ligand InChI	BindingDB Ligand Name	IC50 (nM)	PubChem AID	Institution	PubChem CID of Ligand
1059560	InChI=1S/C28H33ClFN8O/c1-17-20(7-8-24(30)33-17)27-23-15-37(35-34-23)9-6-10-39-40-38(27)19-11-21-25(22(29)12-19)32-14-18(13-31)26(21)36(5)16-28(2,3)4/h7-8,11-12,14-15,27,34-35H,6,9-10,16H2,1-5H3/t27-/m0/s1	(S)-8-chloro-6-(((6-fluoro-2-methylpyridin-3- yl)(1-(3-hydroxypropyl)-1H-1,2,3-triazol-4- yl)methyl)amino)-4- (neopentylamino)quinoline- 3-carbonitrile::US11066414, Compound 986	5	aid1805683	Gilead Sciences, Inc.	162396149
1059517	InChI=1S/C36H41ClN8O/c1-35(2,3)21-40-31-23(18-38)19-39-32-28(31)16-24(17-29(32)37)41-33(26-6-5-7-27-25(26)11-15-44(4)34(27)46)30-20-45(43-42-30)36-12-8-22(9-13-36)10-14-36/h5-7,11,15-17,19-20,22,33,41-43H,8-10,12-14,21H2,1-4H3,(H,39,40)/t22?,33-,36?/m0/s1	(S)-6-(((1-(bicyclo[2.2.2]octan-1-yl)-1H- 1,2,3-triazol-4-yl)(2-methyl-1-oxo-1,2- dihydroisoquinolin-5-yl)methyl)amino)- 8-chloro-4-(neopentylamino)quinoline-3- carbonitrile::US11066414, Compound 939	18	aid1805683	Gilead Sciences, Inc.	162396148
1059155	InChI=1S/C29H28F4N9O/c1-15-19(5-6-21(30)38-15)24(25-26(43)42(41-40-25)28(7-8-28)29(31,32)33)39-18-9-16(11-34)22-20(10-18)23(17(12-35)13-36-22)37-14-27(2,3)4/h5-6,9-10,13,24,39-41H,7-8,14H2,1-4H3,(H,36,37)/t24-/m0/s1	(S)-6-(((6-fluoro-2-methylpyridin-3-yl)(1- (1-(trifluoromethyl)cyclopropyl)-1H-1,2,3- triazol-4-yl-5-d)methyl)amino)-4- (neopentylamino)quinoline-3,8-dicarbonitrile::US11066414, Compound 574	4	aid1805683	Gilead Sciences, Inc.	162396146
1059006	InChI=1S/C26H31ClFN9O4S/c1-25(2,3)14-32-23-15(9-29)10-31-24-18(23)7-17(8-19(24)27)33-26(39,16-5-6-21(28)30-11-16)20-12-37(36-34-20)13-22(38)35-42(4,40)41/h5-8,10-12,33-34,36,39,42H,13-14H2,1-4H3,(H,31,32)(H2,35,38,40,41)/t26-/m0/s1	(S)-2-(4-(((8-chloro-3-cyano-4- (neopentylamino)quinolin-6- yl)amino)(6-fluoropyridin-3-yl)methyl- d)-1H-1,2,3-triazol-1-yl)-N-(methyl- sulfonyl)acetamide::US11066414, Compound 425	7	aid1805683	Gilead Sciences, Inc.	162396145
1059468		(S)-6-(((1-(bicyclo[1.1.1]pentan-1-yl)-1H- 1,2,3-triazol-4-yl)(1-oxo-1,2- dihydroisoquinolin- 5-yl)methyl)amino)-4- (neopentylamino)quinoline-3,8-dicarbonitrile::US11066414, Compound 888	2	aid1805683	Gilead Sciences, Inc.	162370597
1059456		(S)-6-(((1-(1-(difluoromethyl)cyclopropyl)- 1H-1,2,3-triazol-4-yl)(1-oxo-1,2- dihydroisoquinolin-5-yl)methyl)amino)-4- (neopentylamino)quinoline-3,8- dicarbonitrile::US11066414, Compound 876	2	aid1805683	Gilead Sciences, Inc.	162370596
1059422		(S)-6-(((Hl-(difluoromethyl)- cyclopropyl)-1H- 1,2,3-triazol-4-yl)(1-oxo-1,2- dihydroisoquinolin-5-yl)methyl)amino)-4- ((3,3,3-trifluoro-2,2- dimethylpropyl)amino)quinoline-3,8- dicarbonitrile::US11066414, Compound 842	3	aid1805683	Gilead Sciences, Inc.	162370595
1059367		(S)-6-(((1-(bicyclo[1.1.1]pentan- 1-yl)-1H-1,2,3- triazol-4-yl)(1-oxo-1,2- dihydroisoquinolin-5- yl)methyl)amino)-8-chloro-4- (neopentylamino)quinoline-3- carbonitrile::US11066414, Compound 787	2	aid1805683	Gilead Sciences, Inc.	162370594
1059345		(S)-8-chloro-6-(((1-(1- (difluoromethyl)cyclopropyl)- 1H-1,2,3-triazol-4-yl)(1-oxo-1,2- dihydroisoquinolin- 5-yl)methyl)amino)-4- (neopentylamino)quinoline-3- carbonitrile::US11066414, Compound 765	4	aid1805683	Gilead Sciences, Inc.	162370593
1059312	InChI=1S/C29H33ClF2N8O/c1-16-19(6-7-23(41)39(16)5)26(22-14-40(38-37-22)29(8-9-29)27(31)32)36-18-10-20-24(35-15-28(2,3)4)17(12-33)13-34-25(20)21(30)11-18/h6-7,10-11,13-14,26-27,36-38H,8-9,15H2,1-5H3,(H,34,35)/t26-/m0/s1	(S)-8-chloro-6-(((1-(1- (difluoromethyl)cyclopropyl)- 1H-1,2,3-triazol-4-yl)(1,2 -dimethyl-6-oxo-1,6- dihydropyridin-3-yl)methyl)amino)-4- (neopentylamino)quinoline-3- carbonitrile::US11066414, Compound 732	11	aid1805683	Gilead Sciences, Inc.	162370592
1059306		(S)-8-chloro-6-(((1-(1- (difluoromethyl)cyclopropyl)- 1H-1,2,3-triazol-4-yl)(1-oxo-1,2- dihydroisoquinolin- 5-yl)methyl)amino)-4- ((3,3,3-trifluoro-2,2 -dimethylpropyl)amino)quinoline- 3-carbonitrile::US11066414, Compound 726	4	aid1805683	Gilead Sciences, Inc.	162370591
1059281		(S)-4-(neopentylamino)-6-(((1-oxo-1,2- dihydroisoquinolin-5-yl)(4-(1-1- (trifluoromethyl)- cyclopropyl)-1H-1,2,3-triazol-4- yl)methyl)amino)quinoline-3,8- dicarbonitrile::US11066414, Compound 700	2	aid1805683	Gilead Sciences, Inc.	162370590
1059260	InChI=1S/C28H34ClN9/c1-28(2,3)16-33-25-18(12-30)14-32-27-21(25)10-19(11-22(27)29)34-26(17-6-9-24(31-13-17)37(4)5)23-15-38(36-35-23)20-7-8-20/h6,9-11,13-15,20,26,34-36H,7-8,16H2,1-5H3,(H,32,33)/t26-/m1/s1	(S)-8-chloro-6-(((1-cyclopropyl-1H-1,2,3- triazol-4-yl)(6- (dimethylamino)pyridin-3-yl)methyl- d)amino)-4-((2,2-dimethylpropyl-1,1- d2)amino)quinoline-3-carbonitrile::US11066414, Compound 679	13	aid1805683	Gilead Sciences, Inc.	162370589
1059099	InChI=1S/C27H28ClF3N8/c1-26(2,3)14-35-22-16(10-32)12-34-24-18(22)8-17(9-19(24)28)36-23(15-4-5-21(29)33-11-15)20-13-39(38-37-20)27(6-7-27)25(30)31/h4-5,8-9,11-13,23,25,36-38H,6-7,14H2,1-3H3,(H,34,35)/t23-/m1/s1	(S)-8-chloro-6-(((1-(1-(difluoromethyl)- cyclopropyl)-1H-1,2,3-triazol-4-yl)(6- fluoropyridin-3-yl)methyl-d)amino)-4- (neopentylamino)quinoline-3-carbonitrile::US11066414, Compound 518	7	aid1805683	Gilead Sciences, Inc.	162370588
1059091	InChI=1S/C27H28Cl2F2N8/c1-26(2,3)14-35-21-15(11-32)12-34-22-18(21)9-16(10-19(22)28)36-23(17-5-4-8-33-24(17)29)20-13-39(38-37-20)27(6-7-27)25(30)31/h4-5,8-10,12-13,23,25,36-38H,6-7,14H2,1-3H3,(H,34,35)/t23-/m1/s1	8-chloro-6-(((2-chloropyridin-3-yl)(1-(1- (difluoromethyl)cyclopropyl)-1H-1,2,3- triazol-4-yl)methyl-d)amino)-4-(neopentyl- amino)quinoline-3-carbonitrile::US11066414, Compound 510	5	aid1805683	Gilead Sciences, Inc.	162370587
1059088	InChI=1S/C28H31ClF2N8/c1-16-19(6-5-9-33-16)25(22-14-39(38-37-22)28(7-8-28)26(30)31)36-18-10-20-23(35-15-27(2,3)4)17(12-32)13-34-24(20)21(29)11-18/h5-6,9-11,13-14,25-26,36-38H,7-8,15H2,1-4H3,(H,34,35)/t25-/m1/s1	8-chloro-6-(((1-(1-(difluoromethyl)cyclo- propyl)-1H-1,2,3-triazol-4-yl)(2-methyl- pyridin-3-yl)methyl-d)amino)-4- (neopentylamino)quinoline-3-carbonitrile::US11066414, Compound 507	2	aid1805683	Gilead Sciences, Inc.	162370586
1059086	InChI=1S/C27H28ClF3N8/c1-26(2,3)14-35-21-15(11-32)12-34-22-18(21)9-16(10-19(22)28)36-23(17-5-4-8-33-24(17)29)20-13-39(38-37-20)27(6-7-27)25(30)31/h4-5,8-10,12-13,23,25,36-38H,6-7,14H2,1-3H3,(H,34,35)/t23-/m1/s1	8-chloro-6-(((1-(1-(difluoromethyl)- cyclopropyl)-1H-1,2,3-triazol-4-yl)(2- fluoropyridin-3-yl)methyl-d)amino)-4- (neopentylamino)quinoline-3-carbonitrile::US11066414, Compound 505	5	aid1805683	Gilead Sciences, Inc.	162370585
1058746	InChI=1S/C23H16ClF2N9/c24-17-5-14(32-21(19-11-31-35-34-19)12-2-1-3-28-8-12)4-16-20(13(7-27)9-29-22(16)17)33-15-6-18(25)23(26)30-10-15/h1-6,8-11,21,31-32,34-35H,(H,29,33)/t21-/m1/s1	(S)-8-chloro-4-((5,6- difluoropyridin-3- yl)amino)-6-((pyridin- 3-yl(1H-1,2,3- triazol-4-yl)methyl- d)amino)quinoline- 3-carbonitrile::US11066414, Compound 164	5	aid1805683	Gilead Sciences, Inc.	162370584
1058744	InChI=1S/C29H20ClF2N9/c30-23-10-19(9-22-26(18(12-33)14-35-28(22)23)38-20-11-24(31)29(32)36-15-20)37-27(17-5-4-8-34-13-17)25-16-41(40-39-25)21-6-2-1-3-7-21/h1-11,13-16,27,37,39-40H,(H,35,38)/t27-/m1/s1	(S)-8-chloro-4-((5,6-difluoropyridin-3- yl)amino)-6-(((1-phenyl-1H-1,2,3 -triazol-4-yl)(pyridin-3-yl)methyl- d)amino)quinoline-3-carbonitrile::US11066414, Compound 162	7	aid1805683	Gilead Sciences, Inc.	162370583
1058741	InChI=1S/C30H29ClN8/c1-2-26(19-7-4-3-5-8-19)36-28-21(15-32)17-34-30-24(28)13-22(14-25(30)31)35-29(20-9-6-12-33-16-20)27-18-39(38-37-27)23-10-11-23/h3-9,12-14,16-18,23,26,29,35,37-38H,2,10-11H2,1H3,(H,34,36)/t26-,29-/m1/s1	8-chloro-6-(((S)-(1-cyclopropyl-1H- 1,2,3-triazol-4-yl)(pyridin-3-yl)methyl- d)amino)-4-(((R)-1-phenyl propyl)amino)quinoline-3-carbonitrile::US11066414, Compound 159	2	aid1805683	Gilead Sciences, Inc.	162370582
1058605	InChI=1S/C29H26FN9/c1-3-24(18-7-5-4-6-8-18)36-28-21(14-32)16-34-27-20(13-31)11-22(12-23(27)28)35-29(25-17-39(2)38-37-25)19-9-10-26(30)33-15-19/h4-12,15-17,24,29,35,37-38H,3H2,1-2H3,(H,34,36)/t24-,29-/m1/s1	6-(((S)-(6-fluoropyridin-3-yl)(1- methyl-1H-1,2,3- triazol-4-yl)methyl-d)amino)- 4-(((R)-1- phenylpropyl)amino)quinoline- 3,8-dicarbonitrile::US11066414, Compound 22	2	aid1805683	Gilead Sciences, Inc.	162370542
1058594	InChI=1S/C30H27ClF2N8/c31-24-13-21(37-29(19-6-9-27(33)35-15-19)26-17-41(40-39-26)22-7-8-22)12-23-28(20(14-34)16-36-30(23)24)38-25(10-11-32)18-4-2-1-3-5-18/h1-6,9,12-13,15-17,22,25,29,37,39-40H,7-8,10-11H2,(H,36,38)/t25-,29?/m1/s1	8-chloro-6-(((1-cyclopropyl-1H- 1,2,3-triazol-4-yl)(6-fluoropyridin-3- yl)methyl-d)amino)-4-(((R)-3-fluoro- 1-phenylpropyl)amino)quinoline-3- carbonitrile::US11066414, Compound 11	4	aid1805683	Gilead Sciences, Inc.	162370541
1058585	InChI=1S/C21H26Cl2N4O2/c1-12-18(14-4-3-5-15(22)17(14)23)26-16(10-28)20(25-12)27-8-6-21(7-9-27)11-29-13(2)19(21)24/h3-5,13,19,28H,6-11,24H2,1-2H3/t13-,19+/m0/s1	(S)-6-(((1-(tert-butyl)-1H-1,2,3- triazol-4-yl)(6-fluoropyridin-3- yl)methyl-d)amino)-8-chloro-4- (neopentylamino)quinoline-3- carbonitrile::US11066414, Compound 1	8	aid1805683	Gilead Sciences, Inc.	162370507
1058738	InChI=1S/C30H28ClFN8/c1-2-25(18-6-4-3-5-7-18)37-28-20(14-33)16-35-30-23(28)12-21(13-24(30)31)36-29(19-8-11-27(32)34-15-19)26-17-40(39-38-26)22-9-10-22/h3-8,11-13,15-17,22,25,29,36,38-39H,2,9-10H2,1H3,(H,35,37)/t25-,29-/m1/s1	8-chloro-6-(((S)-(1-cyclopropyl-1H- 1,2,3-triazol-4-yl)(6-fluoropyridin-3- yl)methyl-d)amino)-4-(((R)-1- phenylpropyl)amino)quinoline-3- carbonitrile::US11066414, Compound 155	2	aid1805683	Gilead Sciences, Inc.	162370506
1058737	InChI=1S/C30H28ClFN8/c1-2-25(18-7-4-3-5-8-18)37-27-19(15-33)16-35-28-23(27)13-20(14-24(28)31)36-29(22-9-6-12-34-30(22)32)26-17-40(39-38-26)21-10-11-21/h3-9,12-14,16-17,21,25,29,36,38-39H,2,10-11H2,1H3,(H,35,37)/t25-,29-/m1/s1	(S)-8-chloro-6-(((2,6-difluoropyridin-3- yl)(1H-1,2,3-triazol-4-yl)methyl)amino)- 4-((5,6-difluoropyridin-3- yl)amino)quinoline-3-carbonitrile::US11066414, Compound 154	26	aid1805683	Gilead Sciences, Inc.	162370505
1058736	InChI=1S/C26H28ClFN8/c1-26(2,3)14-32-22-15(11-29)12-31-23-19(22)9-16(10-20(23)27)33-24(18-5-4-8-30-25(18)28)21-13-36(35-34-21)17-6-7-17/h4-5,8-10,12-13,17,24,33-35H,6-7,14H2,1-3H3,(H,31,32)/t24-/m1/s1	(S)-8-chloro-6-(((4-chloropyridin-3- yl)(1H-1,2,3-triazol-4- yl)methyl)amin o)-4-((5,6- difluoropyridin-3-yl)amino)quinoline- 3-carbonitrile::US11066414, Compound 153	44	aid1805683	Gilead Sciences, Inc.	162370504
1058735	InChI=1S/C26H27ClF2N8/c1-26(2,3)13-32-22-14(10-30)11-31-23-18(22)8-15(9-19(23)27)33-24(17-6-7-21(28)34-25(17)29)20-12-37(36-35-20)16-4-5-16/h6-9,11-12,16,24,33,35-36H,4-5,13H2,1-3H3,(H,31,32)	(S)-8-chloro-6-(((5-chloropyridin-3- yl)(1H-1,2,3-triazol-4-yl)methyl)amino)- 4-((5,6-difluoropyridin-3- yl)amino)quinoline-3-carbonitrile::US11066414, Compound 152	10	aid1805683	Gilead Sciences, Inc.	162370503
1058734	InChI=1S/C25H29ClN8S/c1-14-24(35-13-30-14)23(20-11-34(33-32-20)17-5-6-17)31-16-7-18-21(29-12-25(2,3)4)15(9-27)10-28-22(18)19(26)8-16/h7-8,10-11,13,17,23,31-33H,5-6,12H2,1-4H3,(H,28,29)	(S)-8-chloro-4-((5,6-difluoropyridin-3- yl)amino)-6-(((2-fluoropyridin-3- yl)(1H-1,2,3-triazol-4- yl)methyl)amino)quinoline-3- carbonitrile::US11066414, Compound 151	8	aid1805683	Gilead Sciences, Inc.	162370502
1058733	InChI=1S/C29H29ClN8S/c1-3-24(18-7-5-4-6-8-18)35-26-19(13-31)14-32-27-22(26)11-20(12-23(27)30)34-28(29-17(2)33-16-39-29)25-15-38(37-36-25)21-9-10-21/h4-8,11-12,14-16,21,24,28,34,36-37H,3,9-10H2,1-2H3,(H,32,35)/t24-,28?/m1/s1	(S)-8-chloro-6-(((1-cyclopropyl-1H- 1,2,3-triazol-4-yl)(2-methylpyridin-3- yl)methyl)amino)-4-((5,6- difluoropyridin-3-yl)amino)quinoline-3- carbonitrile::US11066414, Compound 150	4	aid1805683	Gilead Sciences, Inc.	162370501
1058732	InChI=1S/C31H25FN10/c32-28-9-6-20(16-36-28)31(27-18-42(41-40-27)24-7-8-24)38-23-12-21(14-34)29-25(13-23)30(22(15-35)17-37-29)39-26(10-11-33)19-4-2-1-3-5-19/h1-6,9,12-13,16-18,24,26,31,38,40-41H,7-8,10H2,(H,37,39)/t26-,31-/m1/s1	(S)-8-chloro-6-(((1-cyclopropyl-1H- 1,2,3-triazol-4-yl)(2,6-difluoropyridin-3- yl)methyl)amino)-4-((5,6- difluoropyridin-3-yl)amino)quinoline-3- carbonitrile::US11066414, Compound 149	8	aid1805683	Gilead Sciences, Inc.	162370500
1058682	InChI=1S/C25H26FN9/c1-25(2,3)14-31-23-17(10-28)12-30-22-16(9-27)7-18(8-19(22)23)32-24(20-13-35(4)34-33-20)15-5-6-21(26)29-11-15/h5-8,11-13,24,32-34H,14H2,1-4H3,(H,30,31)/t24-/m1/s1	(S)-6-(((6-fluoropyridin-3-yl)(1- methyl-1H-1,2,3-triazol-4-yl)methyl- d)amino)-4-(neopentylamino)quinoline- 3,8-dicarbonitrile::US11066414, Compound 99	3	aid1805683	Gilead Sciences, Inc.	162370499
1058730	InChI=1S/C27H31FN8O/c1-27(2,3)15-32-24-17(11-29)13-31-26-20(24)9-18(10-22(26)37-4)33-25(16-5-8-23(28)30-12-16)21-14-36(35-34-21)19-6-7-19/h5,8-10,12-14,19,25,33-35H,6-7,15H2,1-4H3,(H,31,32)/t25-/m1/s1	8-chloro-4-((5,6-difluoropyridin-3- yl)amino)-6-(((2-methylpyridin-3- yl)(1H-1,2,3-triazol-4-yl)methyl- d)amino)quinoline-3-carbonitrile::US11066414, Compound 147	12	aid1805683	Gilead Sciences, Inc.	162370498
1058729	InChI=1S/C31H31FN8O/c1-3-25(19-7-5-4-6-8-19)37-29-21(15-33)17-35-31-24(29)13-22(14-27(31)41-2)36-30(20-9-12-28(32)34-16-20)26-18-40(39-38-26)23-10-11-23/h4-9,12-14,16-18,23,25,30,36,38-39H,3,10-11H2,1-2H3,(H,35,37)/t25-,30-/m1/s1	(S)-8-chloro-6-(((5-chloropyridin- 3-yl)(1-cyclopropyl-1H-1,2,3- triazol-4-yl)methyl)amino)-4- ((5,6-difluoropyridin-3-yl)amino)- quinoline-3-carbonitrile::US11066414, Compound 146	10	aid1805683	Gilead Sciences, Inc.	162370497
1058679	InChI=1S/C28H23Cl2FN8O/c1-40-24-6-3-17(9-21(24)29)35-26-16(11-32)13-34-28-20(26)8-18(10-22(28)30)36-27(15-2-7-25(31)33-12-15)23-14-39(38-37-23)19-4-5-19/h2-3,6-10,12-14,19,27,36-38H,4-5H2,1H3,(H,34,35)/t27-/m1/s1	(S)-8-chloro-4-((3-chloro-4- methoxyphenyl)amino)-6- (((1-cyclopropyl-1H-1,2,3- triazol-4-yl)(6-fluoropyridin-3- yl)methyl-d)amino)quinoline-3- carbonitrile::US11066414, Compound 96	11	aid1805683	Gilead Sciences, Inc.	162370496
1058678	InChI=1S/C31H32ClFN8/c32-25-11-22(37-30(18-1-4-27(33)35-13-18)26-15-41(40-39-26)23-2-3-23)10-24-29(21(12-34)14-36-31(24)25)38-28-19-6-16-5-17(8-19)9-20(28)7-16/h1,4,10-11,13-17,19-20,23,28,30,37,39-40H,2-3,5-9H2,(H,36,38)/t16?,17?,19?,20?,28?,30-/m1/s1	4-(((1S,3S,5S,7S)-adamantan-2- yl)amino)-8-chloro-6-(((S)-(1- cyclopropyl-1H-1,2,3-triazol-4- yl)(6-fluoropyridin-3-yl)methyl- d)amino)quinoline-3-carbonitrile::US11066414, Compound 95	10	aid1805683	Gilead Sciences, Inc.	162370495
1058726	InChI=1S/C28H23Cl2FN8O/c1-40-28-20(29)3-2-4-22(28)36-25-16(11-32)13-34-27-19(25)9-17(10-21(27)30)35-26(15-5-8-24(31)33-12-15)23-14-39(38-37-23)18-6-7-18/h2-5,8-10,12-14,18,26,35,37-38H,6-7H2,1H3,(H,34,36)/t26-/m1/s1	(S)-8-chloro-6-(((5-cyanopyridin-3- yl)(1-cyclopropyl-1H-1,2,3-triazol-4- yl)methyl-d)amino)-4-((5,6- difluoropyridin-3-yl)amino)quinoline- 3-carbonitrile::US11066414, Compound 143	16	aid1805683	Gilead Sciences, Inc.	162370494
1058724	InChI=1S/C28H30ClFN8O/c1-28(2)15-39-8-7-23(28)35-25-17(11-31)13-33-27-20(25)9-18(10-21(27)29)34-26(16-3-6-24(30)32-12-16)22-14-38(37-36-22)19-4-5-19/h3,6,9-10,12-14,19,23,26,34,36-37H,4-5,7-8,15H2,1-2H3,(H,33,35)/t23?,26-/m1/s1	(S)-8-chloro-6-(((1-cyclopropyl-1H- 1,2,3-triazol-4-yl)(pyridin-3-yl)methyl- d)amino)-4-(neopentylamino)quinoline- 3-carbonitrile::US11066414, Compound 141	2	aid1805683	Gilead Sciences, Inc.	162370493
1058719	InChI=1S/C31H27ClFN9/c32-25-14-22(38-30(20-8-11-28(33)36-16-20)27-18-42(41-40-27)23-9-10-23)13-24-29(21(15-35)17-37-31(24)25)39-26(7-4-12-34)19-5-2-1-3-6-19/h1-3,5-6,8,11,13-14,16-18,23,26,30,38,40-41H,4,7,9-10H2,(H,37,39)/t26-,30+/m0/s1	(S)-8-chloro-4-((3-chloro-4- fluorophenyl)amino)- 6-((imidazo[1,S- a]pyridin-8-yl(1-isopropyl-1H-1,2,3- triazol-4- yl)methyl)amino)quinoline-3- carbonitrile::US11066414, Compound 136	10	aid1805683	Gilead Sciences, Inc.	162370492
1058718	InChI=1S/C31H27ClFN9/c32-25-14-22(38-30(20-8-11-28(33)36-16-20)27-18-42(41-40-27)23-9-10-23)13-24-29(21(15-35)17-37-31(24)25)39-26(7-4-12-34)19-5-2-1-3-6-19/h1-3,5-6,8,11,13-14,16-18,23,26,30,38,40-41H,4,7,9-10H2,(H,37,39)/t26-,30-/m1/s1	(S)-8-chloro-6-(((6-fluoropyridin-3- yl)(1H-1,2,3-triazol-4-yl)methyl- d)amino)-4- (neopentylamino)quinoline- 3-carbonitrile::US11066414, Compound 135	23	aid1805683	Gilead Sciences, Inc.	162370491
1058668	InChI=1S/C25H26ClFN8O2/c1-25(2,3)13-31-22-15(8-28)10-30-24-17(22)6-16(7-18(24)26)32-23(14-4-5-20(27)29-9-14)19-11-35(34-33-19)12-21(36)37/h4-7,9-11,23,32-34H,12-13H2,1-3H3,(H,30,31)(H,36,37)/t23-/m1/s1	(S)-2-(4-(((8-chloro-3-cyano-4- (neopentylamino)quinolin-6- yl)amino)(6-fluoropyridin-3- yl)methyl-d)-1H-1,2,3-triazol-1- yl)acetic acid::US11066414, Compound 85	4	aid1805683	Gilead Sciences, Inc.	162370490
1058739		(S)-8-chloro-4-((5,6-difluoropyridin-3- yl)amino)-6-(((3,6-dihydro-2H-pyran- 4-yl)(1H-1,2,3-triazol-4- yl)methyl)amino)quinoline-3- carbonitrile::US11066414, Compound 156	8	aid1805683	Gilead Sciences, Inc.	162370489
1059212	InChI=1S/C33H32F3N9O/c1-31(2,3)18-40-28-20(15-38)16-39-27-19(14-37)12-21(13-25(27)28)41-29(23-6-5-7-24-22(23)8-11-44(4)30(24)46)26-17-45(43-42-26)32(9-10-32)33(34,35)36/h5-8,11-13,16-17,29,41-43H,9-10,18H2,1-4H3,(H,39,40)/t29-/m0/s1	(S)-6-(((2-methyl-1- oxo-1,2-dihydroisoquinolin- 5-yl)(1-(1-(trifluoromethyl)- cyclopropyl)-1H-1,2,3- triazol-4-yl)methyl)amino)-4- (neopentylamino)quinoline-3,8- dicarbonitrile::US11066414, Compound 631	2	aid1805683	Gilead Sciences, Inc.	162250964
1059486	InChI=1S/C26H27F2N9/c1-14-18(6-7-20(27)33-14)23(24-25(28)37(5)36-35-24)34-17-8-15(10-29)21-19(9-17)22(16(11-30)12-31-21)32-13-26(2,3)4/h6-9,12,23,34-36H,13H2,1-5H3,(H,31,32)/t23-/m0/s1	(S)-6-(((5-fluoro-1-methyl-1H-1,2,3- triazol-4-yl)(6-fluoro-2-methylpyridin- 3-yl)methyl)amino)-4- (neopentylamino)quinoline-3,8-dicarbonitrile::US11066414, Compound 906	4	aid1805683	Gilead Sciences, Inc.	162031979
1058771	InChI=1S/C25H19ClF3N9/c26-19-7-16(34-23(14-2-1-4-31-10-14)21-13-38(5-3-27)37-36-21)6-18-22(15(9-30)11-32-24(18)19)35-17-8-20(28)25(29)33-12-17/h1-2,4,6-8,10-13,23,34,36-37H,3,5H2,(H,32,35)/t23-/m0/s1	(S)-8-chloro-4-((5,6-difluoropyridin- 3-yl)amino)-6-(((1-(2-fluoroethyl)- 1H-1,2,3-triazol-4-yl)(pyridin-3- yl)methyl)amino)quinoline-3- carbonitrile::US11066414, Compound 189	8	aid1805683	Gilead Sciences, Inc.	162000313
1059457	InChI=1S/C32H34FN9O/c1-19(13-33)42-17-27(39-40-42)30(24-7-6-8-25-23(24)9-10-41(5)31(25)43)38-22-11-20(14-34)28-26(12-22)29(21(15-35)16-36-28)37-18-32(2,3)4/h6-12,16-17,19,30,38-40H,13,18H2,1-5H3,(H,36,37)/t19-,30-/m0/s1	6-(((S)-(1-((S)-1-fluoropropan- 2-yl)-1H-1,2,3- triazol-4-yl)(2-methyl-1-oxo-1,2- dihydroisoquinolin-5-yl)methyl)amino)-4- (neopentylamino)quinoline-3,8- dicarbonitrile::US11066414, Compound 877	2	aid1805683	Gilead Sciences, Inc.	161932430
1058638	InChI=1S/C27H21Cl2FN8/c28-21-7-18(3-4-23(21)30)35-25-17(9-31)12-33-27-20(25)6-19(8-22(27)29)36-26(24-13-34-38-37-24)14-1-2-15-10-32-11-16(15)5-14/h1-8,12-13,26,32,34,36-38H,10-11H2,(H,33,35)/t26-/m0/s1	(S)-8-chloro-4-((3-chloro-4- fluorophenyl)amino)- 6-((isoindolin-5-yl(1H-1,2,3-triazol-4- yl)methyl)amino)quinoline-3- carbonitrile::US11066414, Compound 55	58	aid1805683	Gilead Sciences, Inc.	161863717
1058888	InChI=1S/C32H34Cl2FN9S/c1-18-31(45-17-38-18)30(27-16-44(42-41-27)22-7-9-43(10-8-22)32(2,3)4)40-21-11-23-28(39-20-5-6-26(35)24(33)12-20)19(14-36)15-37-29(23)25(34)13-21/h5-6,11-13,15-17,22,30,40-42H,7-10H2,1-4H3,(H,37,39)/t30-/m1/s1	(R)-6-(((1-(1-(tert-butyl)piperidin-4-yl)- 1H-1,2,3-triazol-4-yl)(4-methyl thiazol-5-yl)methyl)amino)-8-chloro- 4-((3-chloro-4- fluorophenyl)amino)quinoline- 3-carbonitrile::US11066414, Compound 307	4	aid1805683	Gilead Sciences, Inc.	161825854
1058602	InChI=1S/C30H31N9O/c1-30(2,3)16-35-27-19(12-32)14-33-26-18(11-31)9-20(10-23(26)27)36-28(24-15-39(38-37-24)21-7-8-21)22-6-4-5-17-13-34-29(40)25(17)22/h4-6,9-10,14-15,21,28,36-38H,7-8,13,16H2,1-3H3,(H,33,35)(H,34,40)/t28-/m0/s1	(S)-6-(((1-cyclopropyl-1H-1,2,3- triazol-4-yl)(3-oxoisoindolin-4- yl)methyl)amino)-4- (neopentylamino)quinoline-3,8- dicarbonitrilc::US11066414, Compound 19	2	aid1805683	Gilead Sciences, Inc.	161763730
1058591	InChI=1S/C26H22ClF2N9/c1-14(2)38-13-22(36-37-38)24(15-4-3-5-31-10-15)34-17-6-19-23(35-18-8-21(28)26(29)33-12-18)16(9-30)11-32-25(19)20(27)7-17/h3-8,10-14,24,34,36-37H,1-2H3,(H,32,35)/t24-/m0/s1	(S)-8-chloro-4-((5,6-difluoropyridin- 3-yl)amino)-6-(((1-isopropyl-1H- 1,2,3-triazol-4-yl)(pyridin-3- yl)methyl)amino)quinoline-3- carbonitrile::US11066414, Compound 8	7	aid1805683	Gilead Sciences, Inc.	161697309
1059184	InChI=1S/C29H32ClF2N9/c1-28(2,3)15-35-23-17(11-33)12-34-25-20(23)9-18(10-21(25)30)37-26(19-6-4-5-16-13-36-39-24(16)19)22-14-41(40-38-22)29(7-8-29)27(31)32/h4-6,9-10,12,14,26-27,36-40H,7-8,13,15H2,1-3H3,(H,34,35)/t26-/m0/s1	(S)-8-chloro-6-(((1-(1-(difluoromethyl)cyclo- propyl)-1H-1,2,3-triazol-4-yl)(1-methyl-1H- indazol-7-yl)methyl)amino)-4-(neopentyl- amino)quinoline-3-carbonitrile::US11066414, Compound 603	7	aid1805683	Gilead Sciences, Inc.	161683596
1059541	InChI=1S/C30H35ClF2N8O2/c1-16-19(7-8-22(37-16)42-5)25(26-27(43-6)41(40-39-26)30(9-10-30)28(32)33)38-18-11-20-23(36-15-29(2,3)4)17(13-34)14-35-24(20)21(31)12-18/h7-8,11-12,14,25,28,38-40H,9-10,15H2,1-6H3,(H,35,36)/t25-/m0/s1	(S)-8-chloro-6-(((1-(1- (difluoromethyl)cyclopropyl)-5-methoxy- 1H-1,2,3-triazol-4-yl)(6-methoxy-2- methylpyridin-3-yl)methyl)amino)-4- (neopentylamino)quinoline-3-carbonitrile::US11066414, Compound 966	15	aid1805683	Gilead Sciences, Inc.	161610383
1059011	InChI=1S/C31H30F3N9S/c1-17-39-23-7-5-6-21(28(23)44-17)27(24-15-43(42-41-24)30(8-9-30)31(32,33)34)40-20-10-18(12-35)25-22(11-20)26(19(13-36)14-37-25)38-16-29(2,3)4/h5-7,10-11,14-15,27,40-42H,8-9,16H2,1-4H3,(H,37,38)/t27-/m0/s1	(S)-6-(((2-methylbenzo[d]thiazol-7- yl)(1-(1-(trifluoromethyl)cyclopropyl)- 1H-1,2,3-triazol-4-yl)methyl)amino)-4- (neopentylamino)quinoline-3,8- dicarbonitrile::US11066414, Compound 430	5	aid1805683	Gilead Sciences, Inc.	161592696
1059215	InChI=1S/C27H28F3N9/c1-15-19(5-6-23(30)35-15)26(21-12-39(38-37-21)13-22(28)29)36-18-7-16(9-31)24-20(8-18)25(17(10-32)11-33-24)34-14-27(2,3)4/h5-8,11-12,22,26,36-38H,13-14H2,1-4H3,(H,33,34)/t26-/m0/s1	(S)-6-(((1-(2,2-dinuoroethyl)- 1H-1,2,3-triazol- 4-yl)(6-fluoro-2-methylpyridin-3- yl)methyl)amino)-4- (neopentylamino)quinoline- 3,8-dicarbonitrile::US11066414, Compound 634	2	aid1805683	Gilead Sciences, Inc.	161564779
1059470	InChI=1S/C33H32F3N9O/c1-31(2,3)18-40-29-20(15-38)16-39-28-19(14-37)12-21(13-24(28)29)41-30(23-6-5-7-26-22(23)8-9-27(46)44(26)4)25-17-45(43-42-25)32(10-11-32)33(34,35)36/h5-9,12-13,16-17,30,41-43H,10-11,18H2,1-4H3,(H,39,40)/t30-/m0/s1	(S)-6-(((1-methyl-2-oxo-1,2-dihydroquinolin- 5-yl)(1-(1-(trifluoromethyl)cyclopropyl)- 1H-1,2,3-triazol-4-yl)methyl)amino)-4- (neopentylamino)quinoline-3,8-dicarbonitrile::US11066414, Compound 890	6	aid1805683	Gilead Sciences, Inc.	161529749
1058714	InChI=1S/C41H43ClN10O2S/c42-34-12-26(11-30-38(25(13-44)14-45-39(30)34)47-35(7-4-9-43)24-5-2-1-3-6-24)46-40(33-23-55-37-18-50(10-8-29(33)37)27-19-53-20-27)36-17-52(49-48-36)41-31-15-51(16-32(31)41)28-21-54-22-28/h1-3,5-6,11-12,14,17,23,27-28,31-32,35,40-41,46,48-49H,4,7-8,10,15-16,18-22H2,(H,45,47)/t31?,32?,35?,40-,41?/m0/s1	(S)-8-chloro-6-(((1-cyclopropyl-1H- 1,2,3-triazol-4-yl)(2-methylpyridin- 3-yl)methyl)amino)-4-(neopentyl- amino)quinoline-3-carbonitrile::US11066414, Compound 131	2	aid1805683	Gilead Sciences, Inc.	161516548
1058654	InChI=1S/C31H27ClFN9O/c32-25-15-21(39-31(43,24-8-5-13-36-30(24)33)27-18-42(41-40-27)22-10-11-22)14-23-28(20(16-35)17-37-29(23)25)38-26(9-4-12-34)19-6-2-1-3-7-19/h1-3,5-8,13-15,17-18,22,26,39-41,43H,4,9-11H2,(H,37,38)/t26-,31-/m1/s1	8-chloro-4-(((R)-3-cyano-1-phenyl- propyl)amino)-6-(((1-cyclopropyl-1H- 1,2,3-triazol-4-yl)(2-fluoropyridin-3- yl)methyl-d)amino)quinoline-3- carbonitrile::US11066414, Compound 71	2	aid1805683	Gilead Sciences, Inc.	161460503
1059459	InChI=1S/C33H35N9O/c1-32(2,3)19-37-29-21(16-35)17-36-28-20(15-34)13-22(14-26(28)29)38-30(27-18-42(40-39-27)33(4)10-11-33)24-7-6-8-25-23(24)9-12-41(5)31(25)43/h6-9,12-14,17-18,30,38-40H,10-11,19H2,1-5H3,(H,36,37)/t30-/m0/s1	(S)-6-(((2-methyl-1-oxo-1,2- dihydroisoquinolin- 5-yl)(1-(1-methylcyclopropyl)-1H-1,2,3- triazol-4-yl)methyl)amino)-4- (neopentylamino)quinoline-3,8-dicarbonitrile::US11066414, Compound 879	1	aid1805683	Gilead Sciences, Inc.	161376876
1059003	InChI=1S/C28H32ClN9/c1-28(2,3)16-32-25-17(13-30)14-31-26-21(25)11-18(12-22(26)29)34-27(23-15-38(36-35-23)19-6-7-19)20-5-4-10-37-24(20)8-9-33-37/h4-5,8,10-12,14-15,19,27,33-36H,6-7,9,16H2,1-3H3,(H,31,32)/t27-/m0/s1	(S)-8-chloro-6-(((1-cyclopropyl-1H-1,2,3- triazol-4-yl)(pyrazolo[1,5-a]pyridin-4- yl)methyl)amino)-4-(neopentylamino)- quinoline-3-carbonitrile::US11066414, Compound 422	2	aid1805683	Gilead Sciences, Inc.	161374007
1058899	InChI=1S/C27H20Cl3FN8O/c28-20-7-15(3-4-22(20)31)35-24-14(9-32)10-34-25-19(24)6-16(8-21(25)29)36-26(18-2-1-5-33-27(18)30)23-11-39(38-37-23)17-12-40-13-17/h1-8,10-11,17,26,36-38H,12-13H2,(H,34,35)/t26-/m0/s1	(S)-8-chloro-4-((3-chloro-4- fluorophenyl)amino)-6-(((2- chloropyridin-3-yl)(1-(oxetan-3-yl)- 1H-1,2,3-triazol-4-yl)methyl)amino)- quinoline-3-carbonitrile::US11066414, Compound 319	5	aid1805683	Gilead Sciences, Inc.	161333557
1058616	InChI=1S/C25H18ClF2N9S/c26-17-5-13(34-23(20-10-33-37-36-20)15-2-1-3-19-24(15)38-11-32-19)4-16-21(12(7-29)8-30-22(16)17)35-14-6-18(27)25(28)31-9-14/h1-6,8-10,23,32-34,36-37H,11H2,(H,30,35)/t23-/m0/s1	(S)-6-((benzo[d]thiazol-7-yl(1H- 1,2,3-triazol-4- yl)methyl)amino)-8-chloro-4-((5,6- difluoropyridin-3-yl)amino)quinoline-3- carbonitrile::US11066414, Compound 33	11	aid1805683	Gilead Sciences, Inc.	161302303
1058635	InChI=1S/C35H36Cl2FN9S/c1-35(2,3)46-11-9-23(10-12-46)47-18-30(44-45-47)33(24-5-4-6-29-34(24)48-19-41-29)43-22-13-25-31(42-21-7-8-28(38)26(36)14-21)20(16-39)17-40-32(25)27(37)15-22/h4-8,13-15,17-18,23,33,41,43-45H,9-12,19H2,1-3H3,(H,40,42)/t33-/m0/s1	(S)-6-((benzo[d]thiazol-7-yl(1-(1- (tert-butyl)piperidin-4-yl)-1H- 1,2,3-triazol-4-yl)methyl)amino)- 8-chloro-4-((3-chloro- 4-fluorophenyl)amino)quinoline- 3-carbonitrile::US11066414, Compound 52	4	aid1805683	Gilead Sciences, Inc.	161296182
1058629	InChI=1S/C29H23Cl2FN8O2/c30-22-7-17(4-5-24(22)32)36-27-16(9-33)10-34-28-20(27)6-18(8-23(28)31)37-29(25-11-35-39-38-25)19-3-1-2-15-12-40(13-21(15)19)26(42)14-41/h1-8,10-11,29,35,37-39,41H,12-14H2,(H,34,36)/t29-/m0/s1	(S)-8-chloro-4-((3-chloro-4- fluorophenyl)amino)- 6-(((2-(2-hydroxyacetyl)isoindolin- 4-yl)(1H-1,2,3-triazol-4- yl)methyl)amino)quinoline-3- carbonitrile::US11066414, Compound 46	3	aid1805683	Gilead Sciences, Inc.	161260595
1058608	InChI=1S/C28H31BrN8S/c1-28(2,3)14-32-24-16(11-30)12-31-25-20(24)9-17(10-21(25)29)34-26(23-13-37(36-35-23)18-7-8-18)19-5-4-6-22-27(19)38-15-33-22/h4-6,9-10,12-13,18,26,33-36H,7-8,14-15H2,1-3H3,(H,31,32)/t26-/m0/s1	(S)-6-((benzo[d]thiazol-7-yl(1- cyclopropyl-1H- 1,2,3-triazol-4-yl)methyl)amino)-8- bromo-4-(neopentylamino)quinoline- 3-carbonitrile::US11066414, Compound 25	2	aid1805683	Gilead Sciences, Inc.	161248075
1058662	InChI=1S/C29H33ClN8/c1-29(2,3)16-34-26-18(11-31)13-33-27-22(26)9-19(10-24(27)30)35-28(25-15-38(37-36-25)20-7-8-20)21-6-4-5-17-12-32-14-23(17)21/h4-6,9-10,13,15,20,28,32,35-37H,7-8,12,14,16H2,1-3H3,(H,33,34)/t28-/m0/s1	(S)-8-chloro-6-(((1-cyclopropyl- 1H-1,2,3-triazol- 4-yl)(isoindolin-4-yl)methyl)amino)- 4-(neopentylamino)quinoline- 3-carbonitrile::US11066414, Compound 27::US11066414, Compound 79	1	aid1805683	Gilead Sciences, Inc.	161192024
1059495	InChI=1S/C31H29Cl2F3N8/c1-29(2,3)16-40-26-18(12-37)14-39-27-22(26)9-19(10-23(27)32)41-28(20-6-4-5-17-13-38-25(33)11-21(17)20)24-15-44(43-42-24)30(7-8-30)31(34,35)36/h4-6,9-11,13-15,28,41-43H,7-8,16H2,1-3H3,(H,39,40)/t28-/m0/s1	(S)-8-chloro-6-(((3-chloroisoquinolin-5-yl)(1- (1-(trifluoromethyl)cyclopropyl)-1H-1,2,3- triazol-4-yl)methyl)amino)-4- (neopentylamino)quinoline-3-carbonitrile::US11066414, Compound 915	44	aid1805683	Gilead Sciences, Inc.	161167770
1058760	InChI=1S/C27H25ClN8O/c28-22-12-20(33-26(24-16-32-36-35-24)18-7-4-9-30-14-18)11-21-25(19(13-29)15-31-27(21)22)34-23(8-10-37)17-5-2-1-3-6-17/h1-7,9,11-12,14-16,23,26,32-33,35-37H,8,10H2,(H,31,34)/t23?,26-/m0/s1	8-chloro-4-(((S)-3-hydroxy-1- phenyl propyl)amino)-6-(((S)- pyridin-3-yl(1H-1,2,3-triazol-4- yl)methyl)amino)quinoline-3- carbonitrile::US11066414, Compound 178	7	aid1805683	Gilead Sciences, Inc.	161069791
1059007	InChI=1S/C29H32ClN9/c1-29(2,3)16-33-26-17(12-31)13-32-27-21(26)10-18(11-23(27)30)34-28(25-15-39(37-35-25)19-8-9-19)20-6-5-7-24-22(20)14-38(4)36-24/h5-7,10-11,13-15,19,28,34-35,37H,8-9,16H2,1-4H3,(H,32,33)/t28-/m0/s1	(S)-8-chloro-6-(((1-cyclopropyl-1H- 1,2,3-triazol-4-yl)(2-methyl-2H-indazol- 4-yl)methyl)amino)-4-(neopentylamino)- quinoline-3-carbonitrile::US11066414, Compound 426	2	aid1805683	Gilead Sciences, Inc.	161039018
1058759	InChI=1S/C29H28ClFN8/c1-2-25(19-7-4-3-5-8-19)36-27-21(15-32)17-34-29-23(27)13-22(14-24(29)30)35-28(20-9-6-11-33-16-20)26-18-39(12-10-31)38-37-26/h3-9,11,13-14,16-18,25,28,35,37-38H,2,10,12H2,1H3,(H,34,36)/t25?,28-/m0/s1	8-chloro-6-(((S)-(1-(2-fluoroethyl)- 1H-1,2,3-triazol-4-yl)(pyridin-3- yl)methyl)amino)-4-(((R)-1- phenylpropyl)amino)quinoline-3- carbonitrile::US11066414, Compound 177	2	aid1805683	Gilead Sciences, Inc.	161011526
1059183	InChI=1S/C30H32F3N9/c1-5-23-21(7-6-10-36-23)27(24-16-42(41-40-24)29(8-9-29)30(31,32)33)39-20-11-18(13-34)25-22(12-20)26(19(14-35)15-37-25)38-17-28(2,3)4/h6-7,10-12,15-16,27,39-41H,5,8-9,17H2,1-4H3,(H,37,38)/t27-/m0/s1	(S)-6-(((2-ethylpyridin-3-yl)(1-(1-(trifluoro- methyl)cyclopropyl)-1H-1,2,3-triazol-4- yl)methyl)amino)-4-(neopentylamino)- quinoline-3,8-dicarbonitrile::US11066414, Compound 602	3	aid1805683	Gilead Sciences, Inc.	161003004
1059001	InChI=1S/C35H42N10S/c1-34(2,3)20-39-31-23(17-37)18-38-30-22(16-36)14-24(15-27(30)31)41-32(26-8-7-9-28-33(26)46-21-40-28)29-19-45(43-42-29)25-10-12-44(13-11-25)35(4,5)6/h7-9,14-15,18-19,21,25,32,41-43H,10-13,20H2,1-6H3,(H,38,39)/t32-/m0/s1	(S)-6-((benzo[d]thiazol-7-yl(1-(1-(tert- butyl)piperidin-4-yl)-1H-1,2,3-triazol- 4-yl)methyl)amino)-4-(neopentyl- amino)quinoline-3,8-dicarbonitrile::US11066414, Compound 420	2	aid1805683	Gilead Sciences, Inc.	160958106
1058822	InChI=1S/C34H40ClN9S/c1-21(23-9-7-6-8-10-23)39-30-24(17-36)18-37-31-27(30)15-25(16-28(31)35)40-32(33-22(2)38-20-45-33)29-19-44(42-41-29)26-11-13-43(14-12-26)34(3,4)5/h6-10,15-16,18-21,26,32,40-42H,11-14H2,1-5H3,(H,37,39)/t21-,32-/m1/s1	6-(((R)-(1-(1-(tert-butyl)piperidin- 4-yl)-1H-1,2,3-triazol-4-yl)(4- methylthiazol-5-yl)methyl)amino)- 8-chloro-4-(((R)-1- phenylethyl)amino)quinoline-3- carbonitrile::US11066414, Compound 240	16	aid1805683	Gilead Sciences, Inc.	160942364
1059446	InChI=1S/C30H34FN9/c1-18-22(6-7-25(31)36-18)28(24-15-40(39-38-24)17-30(5)8-9-30)37-21-10-19(12-32)26-23(11-21)27(20(13-33)14-34-26)35-16-29(2,3)4/h6-7,10-11,14-15,28,37-39H,8-9,16-17H2,1-5H3,(H,34,35)/t28-/m0/s1	(S)-6-(((6-fluoro-2-methylpyridin-3-yl)(1-((1- methylcyclopropyl)methyl)-1H-1,2,3-triazol- 4-yl)methyl)amino)-4- (neopentylamino)quinoline- 3,8-dicarbonitrile::US11066414, Compound 866	2	aid1805683	Gilead Sciences, Inc.	160829473
1058627	InChI=1S/C33H31Cl2FN8O/c1-18(2)44-15-30(41-42-44)33(24-5-3-4-19-13-43(14-26(19)24)23-16-45-17-23)40-22-8-25-31(39-21-6-7-29(36)27(34)9-21)20(11-37)12-38-32(25)28(35)10-22/h3-10,12,15,18,23,33,40-42H,13-14,16-17H2,1-2H3,(H,38,39)/t33-/m0/s1	(S)-8-chloro-4-((3-chloro-4- fluorophenyl)amino)- 6-(((1-isopropyl-1H-1,2,3-triazol- 4-yl)(2-(oxetan-3-yl)isoindolin-4- yl)methyl)amino)quinoline-3- carbonitrile::US11066414, Compound 44	9	aid1805683	Gilead Sciences, Inc.	160819373
1058655	InChI=1S/C32H29ClFN9O/c1-19-25(11-12-29(34)38-19)32(44,28-18-43(42-41-28)23-9-10-23)40-22-14-24-30(21(16-36)17-37-31(24)26(33)15-22)39-27(8-5-13-35)20-6-3-2-4-7-20/h2-4,6-7,11-12,14-15,17-18,23,27,40-42,44H,5,8-10H2,1H3,(H,37,39)/t27-,32-/m1/s1	8-chloro-4-(((R)-3-cyano-1-phenyl- propyl)amino)-6-(((1-cyclopropyl- 1H-1,2,3-triazol-4-yl)(6-fluoro-2- methylpyridin-3-yl)methyl- d)amino)quinoline-3-carbonitrile::US11066414, Compound 72	1	aid1805683	Gilead Sciences, Inc.	160750010
1058793	InChI=1S/C24H19Cl3FN7O/c25-16-1-2-18(21(28)20(16)27)33-22-13(9-29)10-30-24-15(22)7-14(8-17(24)26)32-23(19-11-31-35-34-19)12-3-5-36-6-4-12/h1-3,7-8,10-11,23,31-32,34-35H,4-6H2,(H,30,33)/t23-/m0/s1	(S)-8-chloro-4-((3,4-dichloro-2- fluorophenyl)amino)-6-(((3,6-dihydro- 2H-pyran-4-yl)(1H-1,2,3-triazol-4- yl)methyl)amino)quinoline-3- carbonitrile::US11066414, Compound 211	16	aid1805683	Gilead Sciences, Inc.	160745425
1058745	InChI=1S/C23H14ClF4N9/c24-15-3-12(34-20(18-9-33-37-36-18)10-1-16(25)22(27)31-6-10)2-14-19(11(5-29)7-30-21(14)15)35-13-4-17(26)23(28)32-8-13/h1-4,6-9,20,33-34,36-37H,(H,30,35)/t20-/m0/s1	(S)-8-chloro-6-(((5,6- difluoropyridin- 3-yl)(1H-1,2,3-triazol-4- yl)methyl)amino)-4-((5,6- difluoropyridin-3- yl)amino)quinoline- 3-carbonitrile::US11066414, Compound 163	67	aid1805683	Gilead Sciences, Inc.	160727914
1059463	InChI=1S/C34H32F3N9O/c1-32(2,34(35,36)37)18-41-29-21(15-39)16-40-28-20(14-38)9-22(10-26(28)29)42-30(27-17-46(44-43-27)33-11-19(12-33)13-33)24-5-4-6-25-23(24)7-8-45(3)31(25)47/h4-10,16-17,19,30,42-44H,11-13,18H2,1-3H3,(H,40,41)/t19?,30-,33?/m0/s1	(S)-6-(((1-(bicyclo[1.1.1]pentan- 1-yl)-1H-1,2,3- triazol-4-yl)(2-methyl-1-oxo-1,2- dihydroisoquinolin-5-yl)methyl)amino)-4- ((3,3,3-trifluoro-2,2- dimethylpropyl)amino)quinoline- 3,8-dicarbonitrile::US11066414, Compound 883	1	aid1805683	Gilead Sciences, Inc.	160726567
1059466	InChI=1S/C33H29F6N9O/c1-30(2,32(34,35)36)17-43-27-19(14-41)15-42-26-18(13-40)11-20(12-24(26)27)44-28(22-5-4-6-23-21(22)7-10-47(3)29(23)49)25-16-48(46-45-25)31(8-9-31)33(37,38)39/h4-7,10-12,15-16,28,44-46H,8-9,17H2,1-3H3,(H,42,43)/t28-/m0/s1	(S)-6-(((2-methyl-1-oxo- 1,2-dihydroisoquinolin- 5-yl)(1-(1-(trifluoromethyl)- cyclopropyl)-1H- 1,2,3-triazol-4-yl)methyl)- amino)-4-((3,3,3- trifluoro-2,2-dimethylpropyl)- amino)quinoline- 3,8-dicarbonitrile::US11066414, Compound 886	3	aid1805683	Gilead Sciences, Inc.	160724755
1058592	InChI=1S/C29H29N9S/c1-29(2,3)15-33-26-18(12-31)13-32-25-17(11-30)9-19(10-22(25)26)35-27(24-14-38(37-36-24)20-7-8-20)21-5-4-6-23-28(21)39-16-34-23/h4-6,9-10,13-14,16,20,27,35-37H,7-8,15H2,1-3H3,(H,32,33)/t27-/m0/s1	(S)-6-((benzo[d]thiazol-7-yl(1- cyclopropyl-1H-1,2,3-triazol-4- yl)methyl)amino)-4-(neopentyl- amino)quinoline-3,8-dicarbonitrile::US11066414, Compound 9	1	aid1805683	Gilead Sciences, Inc.	160714572
1059538	InChI=1S/C25H27ClF2N8/c1-13-16(6-7-19(27)32-13)22(23-24(28)36(5)35-34-23)33-15-8-17-20(31-12-25(2,3)4)14(10-29)11-30-21(17)18(26)9-15/h6-9,11,22,33-35H,12H2,1-5H3,(H,30,31)/t22-/m0/s1	(S)-8-chloro-6-(((5-fluoro-1-methyl-1H- 1,2,3-triazol-4-yl)(6-fluoro-2- methylpyridin-3-yl)methyl)amino)-4- (neopentylamino)quinoline-3-carbonitrile::US11066414, Compound 963	4	aid1805683	Gilead Sciences, Inc.	160664922
1058994	InChI=1S/C33H28ClF4N9O/c1-19-24(9-10-28(35)42-19)32(48,27-18-47(46-45-27)31(11-12-31)33(36,37)38)44-22-14-23-29(21(16-40)17-41-30(23)25(34)15-22)43-26(8-5-13-39)20-6-3-2-4-7-20/h2-4,6-7,9-10,14-15,17-18,26,44-46,48H,5,8,11-12H2,1H3,(H,41,43)/t26-,32?/m1/s1	8-chloro-4-(((R)-3-cyano-1-phenyl- propyl)amino)-6-(((6-fluoro-2-methyl- pyridin-3-yl)(1-(1-(trifluoromethyl)- cyclopropyl)-1H-1,2,3-triazol-4- yl)methyl-d)amino)quinoline-3- carbonitrile::US11066414, Compound 413	4	aid1805683	Gilead Sciences, Inc.	160629785
1058756	InChI=1S/C35H36ClN9O/c1-2-30(21-7-4-3-5-8-21)41-32-23(13-37)15-39-34-26(32)11-24(12-29(34)36)40-33(22-9-6-10-38-14-22)31-18-45(43-42-31)35-27-16-44(17-28(27)35)25-19-46-20-25/h3-12,14-15,18,25,27-28,30,33,35,40,42-43H,2,16-17,19-20H2,1H3,(H,39,41)/t27-,28+,30-,33+,35?/m1/s1	8-chloro-6-(((S)-(1-((1 R,5S,6s)-3- (oxetan-3-yl)-3-azabicyclo[3.1,0]hexan- 6-yl)-1H-1,2,3-triazol-4-yl)(pyridin-3- yl)methyl)amino)-4-(((R)-1-phenyl propyl)amino)quinoline-3-carbonitrile::US11066414, Compound 174	2	aid1805683	Gilead Sciences, Inc.	160618851
1058710	InChI=1S/C29H31BrN8O/c1-29(2,3)15-34-25-17(11-31)13-32-26-21(25)9-18(10-22(26)30)35-27(23-14-38(37-36-23)19-7-8-19)20-6-4-5-16-12-33-28(39)24(16)20/h4-6,9-10,13-14,19,27,35-37H,7-8,12,15H2,1-3H3,(H,32,34)(H,33,39)/t27-/m0/s1	(S)-8-chloro-4-((3-chloro-2,6- difluorophenyl)amino)-6-(((1- cyclopropyl-1H- 1,2,3-triazol-4-yl)(6- fluoropyridin-3-yl)methyl- d)amino)quinoline-3-carbonitrile::US11066414, Compound 127	16	aid1805683	Gilead Sciences, Inc.	160552800
1059405	InChI=1S/C32H33F2N9O/c1-32(2,3)18-39-29-20(15-36)16-38-28-19(14-35)10-21(11-26(28)29)40-30(27-17-43(42-41-27)22(12-33)13-34)24-6-5-7-25-23(24)8-9-37-31(25)44-4/h5-11,16-17,22,30,40-42H,12-13,18H2,1-4H3,(H,38,39)/t30-/m0/s1	(S)-6-(((1-(1,3-difluoropropan-2- yl)-1H-1,2,3-triazol- 4-yl)(1-methoxylsoquinolin-5- yl)methyl)amino)-4- (neopentylamino)quinoline- 3,8-dicarbonitrile::US11066414, Compound 825	7	aid1805683	Gilead Sciences, Inc.	160518030
1059105		(S)-8-chloro-6-(((3-methyl-1H-indazol-4- yl)(1-(1-(trifluoromethyl)cyclopropyl)- 1H-1,2,3-triazol-4-yl)methyl)amino)-4- (neopentylamino)quinoline-3-carbonitrile::US11066414, Compound 524	12	aid1805683	Gilead Sciences, Inc.	160505534
1058743	InChI=1S/C23H15Cl2F2N9/c24-16-5-12(33-21(18-10-32-36-35-18)14-2-1-3-29-22(14)25)4-15-19(11(7-28)8-30-20(15)16)34-13-6-17(26)23(27)31-9-13/h1-6,8-10,21,32-33,35-36H,(H,30,34)/t21-/m0/s1	(S)-8-chloro-6-(((2-chloropyridin-3- yl)(1H-1,2,3-triazol-4- yl)methyl)amino)-4-((5,6- difluoropyridin- 3-yl)amino)quinoline-3-carbonitrile::US11066414, Compound 161	12	aid1805683	Gilead Sciences, Inc.	160489062
1059256	InChI=1S/C33H36FN9O/c1-19-24(6-7-28(34)38-19)31(26-17-43(42-41-26)33(9-10-33)22-4-5-22)39-23-12-20(14-35)29-25(13-23)30(21(15-36)16-37-29)40-27-8-11-44-18-32(27,2)3/h6-7,12-13,16-17,22,27,31,39,41-42H,4-5,8-11,18H2,1-3H3,(H,37,40)/t27?,31-/m0/s1	6-(((SMM[1,1'-bi(cyclopropan)]- 1-yl)-1H-1,2,3- triazol-4-yl)(6-fluoro-2-methylpyridin-3- yl)methyl)amino)-4-(((R)-3,3- dimethyltetrahydro- 2H-pyran-4-yl)amino)quinoline- 3,8-dicarbonitrile::US11066414, Compound 675	1	aid1805683	Gilead Sciences, Inc.	160433697
1059458	InChI=1S/C33H34FN9O/c1-32(2,3)19-38-29-21(15-36)16-37-28-20(14-35)12-22(13-26(28)29)39-30(27-17-43(41-40-27)33(18-34)9-10-33)24-6-5-7-25-23(24)8-11-42(4)31(25)44/h5-8,11-13,16-17,30,39-41H,9-10,18-19H2,1-4H3,(H,37,38)/t30-/m0/s1	(S)-6-(((1-(1-(fluoromethyl)cyclopropyl)-1H- 1,2,3-triazol-4-yl)(2-methyl-1-oxo-1,2- dihydroisoquinolin-5-yl)methyl)amino)-4- (neopentylamino)quinoline-3,8-dicarbonitrile::US11066414, Compound 878	2	aid1805683	Gilead Sciences, Inc.	160415856
1058960	InChI=1S/C26H19BrCl3FN8O/c27-14-5-18(26(30)34-11-14)25(22-12-39(3-4-40)38-37-22)36-16-6-17-23(35-15-1-2-21(31)19(28)7-15)13(9-32)10-33-24(17)20(29)8-16/h1-2,5-8,10-12,25,36-38,40H,3-4H2,(H,33,35)/t25-/m0/s1	(S)-6-(((5-bromo-2-chloropyridin-3- yl)(1-(2-hydroxyethyl)-1H-1,2,3- triazol-4-yl)methyl)amino)-8-chloro-4- ((3-chloro-4-fluorophenyl)amino)- quinoline-3-carbonitrile::US11066414, Compound 327	15	aid1805683	Gilead Sciences, Inc.	160412010
1058764	InChI=1S/C30H29ClN8O2/c31-25-12-22(35-29(20-7-4-9-33-14-20)27-16-39(38-37-27)23-17-41-18-23)11-24-28(21(13-32)15-34-30(24)25)36-26(8-10-40)19-5-2-1-3-6-19/h1-7,9,11-12,14-16,23,26,29,35,37-38,40H,8,10,17-18H2,(H,34,36)/t26?,29-/m0/s1	8-chloro-4-(((S)-3-hydroxy-1- phenylpropyl)amino)-6-(((S)-(1- (oxetan-3-yl)-1H-1,2,3-triazol-4- yl)(pyridin-3- yl)methyl)amino)quinoline-3- carbonitrile::US11066414, Compound 182	13	aid1805683	Gilead Sciences, Inc.	160377696
1059142	InChI=1S/C32H33ClN8O/c1-19(42)32(9-10-32)41-17-27(39-40-41)30(24-7-5-6-20-15-35-11-8-23(20)24)38-22-12-25-28(37-18-31(2,3)4)21(14-34)16-36-29(25)26(33)13-22/h5-8,11-13,15-17,30,38-40H,9-10,18H2,1-4H3,(H,36,37)/t30-/m0/s1	(S)-1-(4-(((8-chloro-3-cyano-4- (neopentylamino)quinolin-6-yl)amino) (isoquinolin-5-yl)methyl)-1H-1,2,3- triazol-1-yl)cyclopropane-1-carboxamide::US11066414, Compound 561	2	aid1805683	Gilead Sciences, Inc.	160373495
1058615	InChI=1S/C28H22ClF2N9OS/c29-20-5-15(4-19-24(14(7-32)8-33-25(19)20)37-16-6-21(30)28(31)34-9-16)36-26(18-2-1-3-22-27(18)42-13-35-22)23-10-40(39-38-23)17-11-41-12-17/h1-6,8-10,17,26,35-36,38-39H,11-13H2,(H,33,37)/t26-/m0/s1	(S)-6-((benzo[d]thiazol-7-yl(1- (oxetan-3-yl)-1H-1,2,3-triazol-4- yl)methyl)amino)-8- chloro-4-((5,6-difluoropyridin-3- yl)amino)quinoline-3- carbonitrile::US11066414, Compound 32	7	aid1805683	Gilead Sciences, Inc.	160261695
1058659	InChI=1S/C30H31N9O/c1-30(2,3)16-35-27-18(12-32)13-33-26-17(11-31)9-19(10-23(26)27)36-28(25-15-39(38-37-25)20-7-8-20)21-5-4-6-22-24(21)14-34-29(22)40/h4-6,9-10,13,15,20,28,36-38H,7-8,14,16H2,1-3H3,(H,33,35)(H,34,40)/t28-/m0/s1	(S)-6-(((1-cyclopropyl-1H-1,2,3- triazol-4-yl)(1-oxoisoindolin- 4-yl)methyl)amino)-4- (neopentylamino)quinoline- 3,8-dicarbonitrile::US11066414, Compound 76	1	aid1805683	Gilead Sciences, Inc.	160257516
1058981	InChI=1S/C29H32Cl2FN11/c1-3-42-8-6-20(7-9-42)43-16-26(38-40-43)29(25-15-41(2)39-37-25)36-19-10-21-27(35-18-4-5-24(32)22(30)11-18)17(13-33)14-34-28(21)23(31)12-19/h4-5,10-12,14-16,20,29,36-40H,3,6-9H2,1-2H3,(H,34,35)	8-chloro-4-((3-chloro-4-fluoro- phenyl)amino)-6-(((1-(1-ethyl- piperidin-4-yl)-1H-1,2,3-triazol-4- yl)(1-methyl-1H-1,2,3-triazol-4- yl)methyl)amino)quinoline-3- carbonitrile::US11066414, Compound 396	43	aid1805683	Gilead Sciences, Inc.	160255185
1058639	InChI=1S/C27H21Cl2FN8/c28-21-7-16(4-5-23(21)30)35-25-15(9-31)11-33-26-19(25)6-17(8-22(26)29)36-27(24-13-34-38-37-24)18-3-1-2-14-10-32-12-20(14)18/h1-8,11,13,27,32,34,36-38H,10,12H2,(H,33,35)/t27-/m0/s1	(S)-8-chloro-4-((3-chloro-4- fluorophenyl)amino)- 6-((isoindolin-4-yl(1H-1,2,3-triazol-4- yl)methyl)amino)quinoline-3- carbonitrile::US11066414, Compound 56	6	aid1805683	Gilead Sciences, Inc.	160255022
1058620	InChI=1S/C27H20Cl3FN8/c28-19-4-5-21(24(31)23(19)30)37-25-14(8-32)10-34-26-17(25)6-15(7-20(26)29)36-27(22-12-35-39-38-22)16-3-1-2-13-9-33-11-18(13)16/h1-7,10,12,27,33,35-36,38-39H,9,11H2,(H,34,37)/t27-/m0/s1	(S)-8-chloro-4-((3,4-dichloro-2- fluorophenyl)amino)-6-((isoindolin- 4-yl(1H-1,2,3-triazol-4- yl)methyl)amino)quinoline-3- carbonitrile::US11066414, Compound 37	16	aid1805683	Gilead Sciences, Inc.	160201791
1059159	InChI=1S/C32H33N9/c1-31(2,3)19-37-29-21(16-34)17-36-28-20(15-33)13-22(14-25(28)29)38-30(27-18-41(40-39-27)32(4)10-11-32)24-7-5-9-26-23(24)8-6-12-35-26/h5-9,12-14,17-18,30,38-40H,10-11,19H2,1-4H3,(H,36,37)/t30-/m0/s1	(S)-6-(((1-(1-methylcyclopropyl)-1H-1,2,3- triazol-4-yl)(quinolin-5-yl)methyl)amino)- 4-(neopentylamino)quinoline-3,8- dicarbonitrile::US11066414, Compound 578	2	aid1805683	Gilead Sciences, Inc.	160197561
1058986	InChI=1S/C28H24Cl2FN9/c29-22-9-18(3-4-24(22)31)36-26-17(11-32)13-35-28-21(26)8-19(10-23(28)30)37-27(16-2-1-6-33-12-16)25-15-40(39-38-25)20-5-7-34-14-20/h1-4,6,8-10,12-13,15,20,27,34,37-39H,5,7,14H2,(H,35,36)/t20-,27?/m1/s1	8-chloro-4-((3-chloro-4-fluoro- phenyl)amino)-6-((pyridin-3-yl(1- ((R)-pyrrolidin-3-yl)-1H-1,2,3- triazol-4-yl)methyl)amino)quinoline- 3-carbonitrile::US11066414, Compound 401	10	aid1805683	Gilead Sciences, Inc.	160190227
1059179	InChI=1S/C30H31F4N9/c1-5-22-20(6-7-24(31)40-22)27(23-15-43(42-41-23)29(8-9-29)30(32,33)34)39-19-10-17(12-35)25-21(11-19)26(18(13-36)14-37-25)38-16-28(2,3)4/h6-7,10-11,14-15,27,39,41-42H,5,8-9,16H2,1-4H3,(H,37,38)/t27-/m0/s1	(S)-6-(((2-ethyl-6- fluoropyridin-3-yl)(1-(1- (trifluoromethyl)cyclopropyl)-1H-1,2,3- triazol-4-yl)methyl)amino)- 4-(neopentylamino)- quinoline-3,8-dicarbonitrile::US11066414, Compound 598	5	aid1805683	Gilead Sciences, Inc.	160148100
1059181	InChI=1S/C29H32ClF3N8/c1-5-22-19(7-6-10-35-22)26(23-15-41(40-39-23)28(8-9-28)29(31,32)33)38-18-11-20-24(37-16-27(2,3)4)17(13-34)14-36-25(20)21(30)12-18/h6-7,10-12,14-15,26,38-40H,5,8-9,16H2,1-4H3,(H,36,37)/t26-/m0/s1	(S)-8-chloro-6-(((2-ethylpyridin-3-yl)(1-(1- (trifluoromethyl)cyclopropyl)-1H-1,2,3- triazol-4-yl)methyl)amino)-4- (neopentylamino)quinoline-3-carbonitrile::US11066414, Compound 600	5	aid1805683	Gilead Sciences, Inc.	160147406
1059160	InChI=1S/C27H29ClF2N8/c1-14-17(5-6-23(30)34-14)26(21-12-38(37-36-21)22-9-20(22)29)35-16-7-18-24(33-13-27(2,3)4)15(10-31)11-32-25(18)19(28)8-16/h5-8,11-12,20,22,26,35-37H,9,13H2,1-4H3,(H,32,33)/t20-,22+,26-/m0/s1	8-chloro-6-(((S)-(6-fluoro-2-methylpyridin- 3-yl)(1-((lR,2S)-2-fluorocyclopropyl)-1H- 1,2,3-triazol-4-yl)methyl)amino)-4- (neopentylamino)quinoline-3-carbonitrile::US11066414, Compound 579	2	aid1805683	Gilead Sciences, Inc.	160142757
1059089	InChI=1S/C31H31ClF2N8/c1-30(2,3)17-38-26-18(14-35)15-37-27-22(26)12-19(13-23(27)32)39-28(21-6-4-8-24-20(21)7-5-11-36-24)25-16-42(41-40-25)31(9-10-31)29(33)34/h4-8,11-13,15-16,28-29,39-41H,9-10,17H2,1-3H3,(H,37,38)/t28-/m0/s1	(S)-8-chloro-6-(((1-(1-(difluoromethyl)- cyclopropyl)-1H-1,2,3-triazol-4-yl)(quinolin- 5-yl)methyl)amino)-4-(neopentylamino)- quinoline-3-carbonitrile::US11066414, Compound 508	4	aid1805683	Gilead Sciences, Inc.	160142254
1058866	InChI=1S/C32H34Cl2N10/c1-32(2,3)43-9-6-25(7-10-43)44-19-28(41-42-44)30(20-5-4-8-36-15-20)39-23-12-26-29(40-24-11-22(33)17-37-18-24)21(14-35)16-38-31(26)27(34)13-23/h4-5,8,11-13,15-19,25,30,39,41-42H,6-7,9-10H2,1-3H3,(H,38,40)	(S)-6-(((1-(1-(tert-butyl)piperidin-4- yl)-1H-1,2,3-triazol-4-yl)(pyridin-3- yl)methyl)amino)-8-chloro-4-((5- chloropyridin-3-yl)amino)quinoline- 3-carbonitrile::US11066414, Compound 284	14	aid1805683	Gilead Sciences, Inc.	160109708
1058644	InChI=1S/C29H23Cl2FN8S/c1-15(2)40-13-25(38-39-40)28(16-3-6-24-26(7-16)41-14-35-24)37-19-8-20-27(36-18-4-5-23(32)21(30)9-18)17(11-33)12-34-29(20)22(31)10-19/h3-10,12-15,28,37-39H,1-2H3,(H,34,36)/t28-/m0/s1	(S)-6-((benzo[d]thiazol-6-yl(1- isopropyl-1H-1,2,3-triazol-4- yl)nielhyl)amino)-8- chloro-4-((3-chloro-4- fluorophenyl)amino)quinoline-3- carbonitrile::US11066414, Compound 61	11	aid1805683	Gilead Sciences, Inc.	160100388
1059449	InChI=1S/C28H30F3N9/c1-16-21(5-6-24(31)36-16)27(23-14-40(39-38-23)20(9-29)10-30)37-19-7-17(11-32)25-22(8-19)26(18(12-33)13-34-25)35-15-28(2,3)4/h5-8,13-14,20,27,37-39H,9-10,15H2,1-4H3,(H,34,35)/t27-/m0/s1	(S)-6-(((1-(1,3-difluoropropan- 2-yl)-1H-1,2,3-triazol- 4-yl)(6-fluoro-2-methylpyridin- 3-yl)methyl)amino)- 4-(neopentylamino)quinoline- 3,8-dicarbonitrile::US11066414, Compound 869	2	aid1805683	Gilead Sciences, Inc.	160058181
1058656	InChI=1S/C31H27Cl2N9O/c32-25-15-21(39-31(43,24-8-5-13-36-30(24)33)27-18-42(41-40-27)22-10-11-22)14-23-28(20(16-35)17-37-29(23)25)38-26(9-4-12-34)19-6-2-1-3-7-19/h1-3,5-8,13-15,17-18,22,26,39-41,43H,4,9-11H2,(H,37,38)/t26-,31-/m1/s1	8-chloro-6-(((2-chloropyridin-3-yl)(1- cyclopropyl-1H-1,2,3-triazol-4- yl)methyl-d)amino)-4-(((R)-3-cyano-1- phenylpropyl)amino)quinoline-3- carbonitrile::US11066414, Compound 73	2	aid1805683	Gilead Sciences, Inc.	160011542
1059516	InChI=1S/C28H30ClF3N8O/c1-15-18(5-8-34-25(15)41)24(21-13-40(39-38-21)27(6-7-27)28(30,31)32)37-17-9-19-22(36-14-26(2,3)4)16(11-33)12-35-23(19)20(29)10-17/h5,8-10,12-13,24,37-39H,6-7,14H2,1-4H3,(H,34,41)(H,35,36)/t24-/m0/s1	(S)-8-chloro-6-(((2-chloro-3-methylpyridin- 4-yl)(1-(1-(trifluoromethyl)cyclopropyl)- 1H-1,2,3-triazol-4-yl)methyl)amino)-4- (neopentylamino)quinoline-3-carbonitrile::US11066414, Compound 938	26	aid1805683	Gilead Sciences, Inc.	159989590
1058693	InChI=1S/C36H38Cl2FN9/c1-36(2,3)47-11-9-25(10-12-47)48-20-32(45-46-48)35(26-6-4-5-21-17-41-19-28(21)26)44-24-13-27-33(43-23-7-8-31(39)29(37)14-23)22(16-40)18-42-34(27)30(38)15-24/h4-8,13-15,18,20,25,35,41,44-46H,9-12,17,19H2,1-3H3,(H,42,43)/t35-/m0/s1	8-chloro-6-(((1-cyclopropyl-1H-1,2,3- triazol-4-yl)(6-fluoro-2-methylpyridin- 3-yl)methyl-d)amino)-4-(((R)-1- phenylpropyl)amino)quinoline-3- carbonitrile::US11066414, Compound 110	2	aid1805683	Gilead Sciences, Inc.	159940266
1059084	InChI=1S/C29H31F2N9/c1-17-21(5-6-24(31)36-17)27(23-14-40(39-38-23)29(15-30)7-8-29)37-20-9-18(11-32)25-22(10-20)26(19(12-33)13-34-25)35-16-28(2,3)4/h5-6,9-10,13-14,27,37-39H,7-8,15-16H2,1-4H3,(H,34,35)/t27-/m0/s1	(S)-6-(((6-fluoro-2-methylpyridin-3-yl)(1- (1-(fluoromethyl)cyclopropyl)-1H-1,2,3- triazol-4-yl)methyl)amino)-4- (neopentylamino)quinoline-3,8- dicarbonitrile::US11066414, Compound 503	2	aid1805683	Gilead Sciences, Inc.	159893991
1058601	InChI=1S/C33H39Cl2FN8O/c1-33(2,3)43-10-6-24(7-11-43)44-19-29(41-42-44)31(20-8-12-45-13-9-20)40-23-14-25-30(39-22-4-5-28(36)26(34)15-22)21(17-37)18-38-32(25)27(35)16-23/h4-5,14-16,18-20,24,31,40-42H,6-13H2,1-3H3,(H,38,39)/t31-/m0/s1	(S)-6-(((1-(1-(tert-butyl)piperidin-4-yl)- 1H-1,2,3-triazol-4-yl)(tetrahydro-2H- pyran-4-yl)methyl)amino)-8-chloro-4- ((3-chloro-4-fluorophenyl)amino)- quinoline-3-carbonitrile::US11066414, Compound 18	28	aid1805683	Gilead Sciences, Inc.	159797204
1059371	InChI=1S/C25H28ClFN8/c1-14-17(6-7-21(27)31-14)24(20-12-35(5)34-33-20)32-16-8-18-22(30-13-25(2,3)4)15(10-28)11-29-23(18)19(26)9-16/h6-9,11-12,24,32-34H,13H2,1-5H3,(H,29,30)	8-chloro-6-(((6-fluoro-2- methylpyridin-3-yl)(1- methyl-1H-1,2,3-triazol- 4-yl)methyl)amino)- 4-(neopentylamino)quinoline- 3-carbonitrile::US11066414, Compound 791	22	aid1805683	Gilead Sciences, Inc.	159778321
1059480	InChI=1S/C34H35N9/c1-20-8-9-25-26(6-5-7-28(25)39-20)32(29-18-43(42-41-29)34-12-21(13-34)14-34)40-24-10-22(15-35)30-27(11-24)31(23(16-36)17-37-30)38-19-33(2,3)4/h5-11,17-18,21,32,40-42H,12-14,19H2,1-4H3,(H,37,38)/t21?,32-,34?/m0/s1	(S)-6-(((1-(bicyclo[1.1.1]pentan-1-yl)-1H- 1,2,3-triazol-4-yl)(2-methylquinolin-5- yl)methyl)amino)-4- (neopentylamino)quinoline-3,8-dicarbonitrile::US11066414, Compound 900	3	aid1805683	Gilead Sciences, Inc.	159685784
1059010	InChI=1S/C33H36F3N9OS/c1-31(2,3)18-40-29-20(11-38)12-39-28-19(10-37)8-21(9-24(28)29)41-30(26-13-45(43-42-26)32(5-6-32)33(34,35)36)25-17-47-27-14-44(7-4-23(25)27)22-15-46-16-22/h8-9,12-13,17,22,30,41-43H,4-7,14-16,18H2,1-3H3,(H,39,40)/t30-/m0/s1	(S)-4-(neopentylamino)-6-(((6-(oxetan-3- yl)-4,5,6,7-tetrahydrothieno[2,3-c]pyridin- 3-yl)(1-(1-(trifluoromethyl)cyclopropyl)- 1H-1,2,3-triazol-4-yl)methyl)amino)- quinoline-3,8-dicarbonitrile::US11066414, Compound 429	2	aid1805683	Gilead Sciences, Inc.	159667475
1059026	InChI=1S/C30H33ClF2N8/c1-29(2,3)16-37-25-18(11-34)13-36-26-21(25)9-19(10-23(26)31)38-27(20-6-4-5-17-12-35-14-22(17)20)24-15-41(40-39-24)30(7-8-30)28(32)33/h4-6,9-10,13,15,27-28,35,38-40H,7-8,12,14,16H2,1-3H3,(H,36,37)/t27-/m0/s1	(S)-8-chloro-6-(((1-(1-(difluoromethyl)- cyclopropyl)-1H-1,2,3-triazol-4- yl)(isoindolin-4-yl)methyl)amino)-4- (neopentylamino)quinoline-3- carbonitrile::US11066414, Compound 445	2	aid1805683	Gilead Sciences, Inc.	159648417
1058800	InChI=1S/C27H25ClN8O/c1-16-20(8-5-9-30-16)27(23-14-32-36-35-23)33-19-10-21-25(18(12-29)13-31-26(21)22(28)11-19)34-24(15-37)17-6-3-2-4-7-17/h2-11,13-14,24,27,32-33,35-37H,15H2,1H3,(H,31,34)/t24-,27+/m1/s1	8-chloro-4-(((S)-2-hydroxy-1- phenylethyl)amino)-6-(((S)-(2- methylpyridin-3-yl)(1H-1,2,3-triazol- 4-yl)methyl)amino)quinoline-3- carbonitrile::US11066414, Compound 218	26	aid1805683	Gilead Sciences, Inc.	159595279
1058606	InChI=1S/C30H33N9/c1-30(2,3)17-35-28-19(14-32)15-34-27-18(13-31)11-20(12-24(27)28)36-29(26-16-39(38-37-26)21-7-8-21)23-5-4-6-25-22(23)9-10-33-25/h4-6,11-12,15-16,21,29,33,36-38H,7-10,17H2,1-3H3,(H,34,35)/t29-/m0/s1	(S)-6-(((1-cyclopropyl-1H-1,2,3- triazol-4-yl)(indolin-4- yl)methyl)amino)-4- (neopentylamino)quinoline-3,8- dicarbonitrile::US11066414, Compound 23	4	aid1805683	Gilead Sciences, Inc.	159570282
1059277	InChI=1S/C34H35N9/c1-33(2,3)20-39-31-22(17-36)18-38-30-21(16-35)14-24(15-27(30)31)40-32(26-6-4-8-28-25(26)7-5-13-37-28)29-19-43(42-41-29)34(11-12-34)23-9-10-23/h4-8,13-15,18-19,23,32,40-42H,9-12,20H2,1-3H3,(H,38,39)/t32-/m0/s1	(S)-6-(((H[1,1'-bi(cyclopropan)]- 1-yl)-1H-1,2,3- triazol-4-yl)(quinolin-5- yl)methyl)amino)-4- (neopentylamino)quinoline- 3,8-dicarbonitrile::US11066414, Compound 696	2	aid1805683	Gilead Sciences, Inc.	159510313
1058595	InChI=1S/C30H27Cl2FN8/c1-16(2)41-15-27(39-40-41)30(21-4-3-5-26-20(21)8-9-35-26)38-19-10-22-28(37-18-6-7-25(33)23(31)11-18)17(13-34)14-36-29(22)24(32)12-19/h3-7,10-12,14-16,30,35,38-40H,8-9H2,1-2H3,(H,36,37)/t30-/m0/s1	(S)-8-chloro-4-t-((3-chloro-4- fluorophenyl)amino)-6-((indolin- 4-yl(1-isopropyl-1H-1,2,3-triazol- 4-yl)methyl)amino)quinoline-3- carbonitrile::US11066414, Compound 12	27	aid1805683	Gilead Sciences, Inc.	159413869
1059131	InChI=1S/C32H31F2N9/c1-31(2,3)18-39-28-20(15-36)16-38-27-19(14-35)12-21(13-24(27)28)40-29(23-6-4-8-25-22(23)7-5-11-37-25)26-17-43(42-41-26)32(9-10-32)30(33)34/h4-8,11-13,16-17,29-30,40-42H,9-10,18H2,1-3H3,(H,38,39)/t29-/m0/s1	(S)-6-(((1-(1-(difluoromethyl)cyclopropyl)- 1H-1,2,3-triazol-4-yl)(quinolin-5- yl)methyl)amino)-4-(neopentylamino)- quinoline-3,8-dicarbonitrile::US11066414, Compound 550	2	aid1805683	Gilead Sciences, Inc.	159411505
1059121	InChI=1S/C30H32ClF3N8O/c1-16-19(4-5-24(32)37-16)27(22-14-42(41-40-22)30(7-8-30)28(33)34)38-18-10-20-25(39-23-6-9-43-15-29(23,2)3)17(12-35)13-36-26(20)21(31)11-18/h4-5,10-11,13-14,23,27-28,38,40-41H,6-9,15H2,1-3H3,(H,36,39)/t23?,27-/m0/s1	8-chloro-6-(((S)-(1-(1-(difluoromethyl)- cyclopropyl)-1H-1,2,3-triazol-4-yl)(6- fluoro-2-methylpyridin-3-yl)methyl)- amino)-4-(((S)-3,3-dimethyltetrahydro- 2H-pyran-4-yl)amino)quinoline-3- carbonitrile::US11066414, Compound 540	50	aid1805683	Gilead Sciences, Inc.	159403632
1059515	InChI=1S/C31H29ClF4N8/c1-29(2,3)16-40-26-17(12-37)13-39-27-22(26)10-19(11-23(27)32)41-28(20-5-4-6-24-21(20)9-18(33)14-38-24)25-15-44(43-42-25)30(7-8-30)31(34,35)36/h4-6,9-11,13-15,28,41-43H,7-8,16H2,1-3H3,(H,39,40)/t28-/m0/s1	(S)-8-chloro-6-(((3-fluoroquinolin-5- yl)(1-(1-(trifluoromethyl)cyclopropyl)- 1H-1,2,3-triazol-4-yl)methyl)amino)-4- (neopentylamino)quinoline-3-carbonitrile::US11066414, Compound 937	23	aid1805683	Gilead Sciences, Inc.	159350693
1059488	InChI=1S/C27H30FN9O/c1-15-19(7-8-21(28)33-15)24(25-26(38-6)37(5)36-35-25)34-18-9-16(11-29)22-20(10-18)23(17(12-30)13-31-22)32-14-27(2,3)4/h7-10,13,24,34-36H,14H2,1-6H3,(H,31,32)	6-(((6-fluoro-2-methylpyridin-3-yl)(5- methoxy-1-methyl-1H-1,2,3-triazol-4- yl)methyl)amino)-4-(neopentyl- amino)quinoline-3,8-dicarbonitrile::US11066414, Compound 908	12	aid1805683	Gilead Sciences, Inc.	159246704
1059063	InChI=1S/C28H32ClFN8O/c1-16-19(5-6-23(30)34-16)26(22-13-38(37-36-22)28(15-39)7-8-28)35-18-9-20-24(33-14-27(2,3)4)17(11-31)12-32-25(20)21(29)10-18/h5-6,9-10,12-13,26,35-37,39H,7-8,14-15H2,1-4H3,(H,32,33)/t26-/m0/s1	(S)-8-chloro-6-(((6- fluoro-2-methylpyridin-3- yl)(1-(1-(hydroxymethyl)cyclopropyl)-1H- 1,2,3-triazol-4-yl)methyl)amino)-4- (neopentylamino)quinoline-3-carbonitrile::US11066414, Compound 482	3	aid1805683	Gilead Sciences, Inc.	159237179
1058645	InChI=1S/C35H34Cl2FN9S/c1-35(2,3)46-10-8-24(9-11-46)47-18-30(44-45-47)33(20-4-7-31-29(12-20)41-19-48-31)43-23-13-25-32(42-22-5-6-28(38)26(36)14-22)21(16-39)17-40-34(25)27(37)15-23/h4-7,12-15,17-19,24,33,43-45H,8-11H2,1-3H3,(H,40,42)/t33-/m0/s1	(S)-6-((benzo[d]thiazol-5-yl(1-(1-(tert- butyl)piperidin-4-yl)-1H-1,2,3-triazol- 4-yl)methyl)amino)-8-chloro-4-((3- chloro-4-fluorophenyl)amino)quinoline- 3-carbonitrile::US11066414, Compound 62	10	aid1805683	Gilead Sciences, Inc.	159145436
1059137		(S)-8-chloro-6-(((1-(1- (difluoromethyl)cyclo- propyl)-1H-1,2,3- triazol-4-yl)(3-methyl-1H- indazol-4-yl)methyl)amino)- 4-(neopentyl- amino)quinoline-3-carbonitrile::US11066414, Compound 556	8	aid1805683	Gilead Sciences, Inc.	159055506
1058757	InChI=1S/C29H26ClN9/c1-2-25(19-7-4-3-5-8-19)36-27-21(15-32)17-34-29-23(27)13-22(14-24(29)30)35-28(20-9-6-11-33-16-20)26-18-39(12-10-31)38-37-26/h3-9,11,13-14,16-18,25,28,35,37-38H,2,12H2,1H3,(H,34,36)/t25-,28+/m1/s1	8-chloro-6-(((S)-(1-(cyanomethyl)-1H- 1,2,3-triazol-4-yl)(pyridin-3- yl)methyl)amino)-4-(((R)-1-phenyl propyl)amino)quinoline-3-carbonitrile::US11066414, Compound 175	3	aid1805683	Gilead Sciences, Inc.	158965188
1059108	InChI=1S/C30H32F3N11/c1-28(2,3)16-37-25-18(13-35)14-36-24-17(12-34)10-19(11-21(24)25)38-26(20-6-5-7-22-27(20)43(4)41-39-22)23-15-44(42-40-23)29(8-9-29)30(31,32)33/h5-7,10-11,14-15,26,38-42H,8-9,16H2,1-4H3,(H,36,37)/t26-/m0/s1	(S)-6-(((1-methyl-1H-benzo[d][1,2,3]triazol- 7-yl)(1-(1-(trifluoromethyl)cyclopropyl)- 1H-1,2,3-triazol-4-yl)methyl)amino)-4- (neopentylamino)quinoline-3,8- dicarbonitrile::US11066414, Compound 527	3	aid1805683	Gilead Sciences, Inc.	158937135
1059537	InChI=1S/C33H34ClF3N8/c1-32(2,3)18-43(4)28-19(16-38)17-40-26-23(28)14-20(15-24(26)34)44(5)29(22-8-6-10-25-21(22)9-7-13-39-25)27-30(35)45(42-41-27)33(11-12-33)31(36)37/h6-10,13-15,17,29,31,41-42H,11-12,18H2,1-5H3/t29-/m0/s1	(S)-8-chloro-6-(((1-(1- (difluoromethyl)cyclopropyl)-5-fluoro- 1H-1,2,3-triazol-4-yl)(quinolin-5- yl)methyl)amino)-4- (neopentylamino)quinoline-3-carbonitrile::US11066414, Compound 962	13	aid1805683	Gilead Sciences, Inc.	158884696
1059545	InChI=1S/C27H33ClN8O2/c1-15-18(8-9-21(32-15)37-6)24(25-26(38-7)36(5)35-34-25)33-17-10-19-22(31-14-27(2,3)4)16(12-29)13-30-23(19)20(28)11-17/h8-11,13,24,33-35H,14H2,1-7H3,(H,30,31)	8-chloro-6-(((5-methoxy-1-methyl-1H- 1,2,3-triazol-4-yl)(6-methoxy-2 -methylpyridin-3-yl)methyl)amino)-4- (neopentylamino)quinoline-3-carbonitrile::US11066414, Compound 970	34	aid1805683	Gilead Sciences, Inc.	158865474
1058835	InChI=1S/C27H25Cl2FN8S/c1-14-26(39-13-33-14)25(21-12-38(37-36-21)27(2,3)4)34-16-8-17-23(35-20-7-5-6-18(28)22(20)30)15(10-31)11-32-24(17)19(29)9-16/h5-9,11-13,25,34,36-37H,1-4H3,(H,32,35)/t25-/m1/s1	(R)-6-(((1-(1-(tert-butyl)piperidin- 4-yl)-1H-1,2,3-triazol-4-yl)(4- methylthiazol-5-yl)methyl)amino)- 8-chloro-4-((3-chloro-2- fluorophenyl)amino)quinoline-3- carbonitrile::US11066414, Compound 253	4	aid1805683	Gilead Sciences, Inc.	158838987
1058603	InChI=1S/C29H28Cl2FN9S/c1-2-40-7-5-20(6-8-40)41-14-25(38-39-41)29(26-15-42-16-35-26)37-19-9-21-27(36-18-3-4-24(32)22(30)10-18)17(12-33)13-34-28(21)23(31)11-19/h3-4,9-11,13-16,20,29,37-39H,2,5-8H2,1H3,(H,34,36)	(S)-8-chloro-4-((3-chloro-4- fluorophenyl)amino)- 6-(((1-(1-ethylpiperidin-4-yl)- 1H-1,2,3-triazol-4- yl)(thiazol-4-yl)methyl)amino)- quinoline-3-carbonitrile::US11066414, Compound 20	2	aid1805683	Gilead Sciences, Inc.	158838491
1058696	InChI=1S/C35H34Cl2FN9S/c1-35(2,3)46-10-8-24(9-11-46)47-18-30(44-45-47)33(20-4-7-29-31(12-20)48-19-41-29)43-23-13-25-32(42-22-5-6-28(38)26(36)14-22)21(16-39)17-40-34(25)27(37)15-23/h4-7,12-15,17-19,24,33,43-45H,8-11H2,1-3H3,(H,40,42)/t33-/m0/s1	8-chloro-6-(((1-cyclopropyl-1H-1,2,3- triazol-4-yl)(5-fluoro-2-methylpyridin- 3-yl)methyl-d)amino)-4-(((R)-1- phenylpropyl)amino)quinoline-3- carbonitrile::US11066414, Compound 113	13	aid1805683	Gilead Sciences, Inc.	158761396
1058600	InChI=1S/C36H40Cl2FN9O/c1-21(2)49-32-9-6-22(18-41-32)34(31-20-48(46-45-31)26-10-12-47(13-11-26)36(3,4)5)44-25-14-27-33(43-24-7-8-30(39)28(37)15-24)23(17-40)19-42-35(27)29(38)16-25/h6-9,14-16,18-21,26,34,44-46H,10-13H2,1-5H3,(H,42,43)/t34-/m0/s1	(S)-6-(((1-(1-(tert-butyl)piperidin-4- yl)-1H-1,2,3-triazol-4-yl)(6- isopropoxypyridin-3-yl)methyl)amino)- 8-chloro-4-((3-chloro-4-fluorophenyl)- amino)quinoline-3-carbonitrile::US11066414, Compound 17	53	aid1805683	Gilead Sciences, Inc.	158756830
1059546	InChI=1S/C26H30ClFN8O/c1-14-17(7-8-20(28)32-14)23(24-25(37-6)36(5)35-34-24)33-16-9-18-21(31-13-26(2,3)4)15(11-29)12-30-22(18)19(27)10-16/h7-10,12,23,33-35H,13H2,1-6H3,(H,30,31)	8-chloro-6-(((6-fluoro-2-methylpyridin- 3-yl)(5-methoxy-1-methyl-1H-1,2,3- triazol-4-yl)methyl)amino)-4- (neopentylamino)quinoline-3-carbonitrile::US11066414, Compound 971	11	aid1805683	Gilead Sciences, Inc.	158692061
1059539	InChI=1S/C30H32F3N9O/c1-16-20(6-7-22(31)38-16)25(26-27(43-5)42(41-40-26)30(8-9-30)28(32)33)39-19-10-17(12-34)23-21(11-19)24(18(13-35)14-36-23)37-15-29(2,3)4/h6-7,10-11,14,25,28,39-41H,8-9,15H2,1-5H3,(H,36,37)/t25-/m0/s1	(S)-6-(((1-(1-(difluoromethyl)cyclopropyl)- 5-methoxy-1H-1,2,3-triazol-4-yl)(6-fluoro- 2-methylpyridin-3-yl)methyl)amino)-4- (neopentylamino)quinoline-3,8-dicarbonitrile::US11066414, Compound 964	3	aid1805683	Gilead Sciences, Inc.	158669595
1059236	InChI=1S/C33H32ClF2N9/c1-33(2,3)18-39-30-19(13-37)14-38-31-22(30)11-20(12-25(31)34)41-32(21-7-5-10-29-23(21)15-40-44(29)4)28-17-45(43-42-28)16-24-26(35)8-6-9-27(24)36/h5-12,14-15,17,32,41-43H,16,18H2,1-4H3,(H,38,39)/t32-/m0/s1	(S)-8-chloro-6-(((1-(2,6- difluorobenzyl)-1H-1,2,3- triazol-4-yl)(1-methyl-1H- indazol-4- yl)methyl)amino)-4- (neopentylamino)quinoline- 3-carbonitrile::US11066414, Compound 655	12	aid1805683	Gilead Sciences, Inc.	158637080
1058611	InChI=1S/C30H28Cl2FN9/c1-16(2)42-15-26(39-40-42)30(20-5-4-6-27-22(20)14-36-41(27)3)38-19-9-21-28(37-18-7-8-25(33)23(31)10-18)17(12-34)13-35-29(21)24(32)11-19/h4-11,13,15-16,30,36,38-40H,14H2,1-3H3,(H,35,37)/t30-/m0/s1	(S)-8-chloro-4-((3-chloro-4- fluorophenyl)amino)- 6-(((1-isopropyl-1H-1,2,3-triazol- 4-yl)(1-methyl-1H-indazol-4- yl)methyl)amino)quinoline-3- carbonitrile::US11066414, Compound 28	12	aid1805683	Gilead Sciences, Inc.	158590886
1058612	InChI=1S/C29H26ClF2N9/c1-15(2)41-14-25(39-40-41)28(20-4-3-5-24-19(20)6-7-34-24)37-17-8-21-26(38-18-10-23(31)29(32)36-13-18)16(11-33)12-35-27(21)22(30)9-17/h3-5,8-10,12-15,28,34,37,39-40H,6-7H2,1-2H3,(H,35,38)/t28-/m0/s1	(S)-8-chloro-4-((5,6-difluoropyridin- 3-yl)amino)6-((indolin-4-yl (1- isopropyl-1H-1,2,3-triazo-4- yl)methyl)amino)- quinoline-3-carbonitrile::US11066414, Compound 29	17	aid1805683	Gilead Sciences, Inc.	158520521
1058810	InChI=1S/C28H25Cl2FN8/c1-15(2)39-14-25(37-38-39)27(17-6-16(3)11-33-12-17)36-20-7-21-26(35-19-4-5-24(31)22(29)8-19)18(10-32)13-34-28(21)23(30)9-20/h4-9,11-15,27,36-38H,1-3H3,(H,34,35)/t27-/m0/s1	(S)-8-chloro-4-((3-chloro-4- fluorophenyl)amino)-6- (((1-isopropyl- 1H-1,2,3-triazol-4- yl)(5-methylpyridin- 3-yl)methyl)amino)quinoline-3- carbonitrile::US11066414, Compound 228	18	aid1805683	Gilead Sciences, Inc.	158502257
1058597	InChI=1S/C39H42Cl2FN9O/c1-39(2,3)50-11-9-27(10-12-50)51-20-35(47-48-51)38(29-6-4-5-23-18-49(19-31(23)29)28-21-52-22-28)46-26-13-30-36(45-25-7-8-34(42)32(40)14-25)24(16-43)17-44-37(30)33(41)15-26/h4-8,13-15,17,20,27-28,38,46-48H,9-12,18-19,21-22H2,1-3H3,(H,44,45)/t38-/m0/s1	(S)-6-(((1-(1-(tert-butyl)piperidin-4- yl)-1H-1,2,3-triazol-4-yl)(2-(oxetan- 3-yl)isoindolin-4-yl)methyl)amino)- 8-chloro-4-4-((3-chloro-4-fluorophenyl)- amino)quinoline-3-carbonitrile::US11066414, Compound 14	7	aid1805683	Gilead Sciences, Inc.	158447258
1059295	InChI=1S/C28H31ClF4N8/c1-15-18(7-8-22(30)37-15)25(21-13-41(40-39-21)26(2,3)4)38-17-9-19-23(36-14-27(5,6)28(31,32)33)16(11-34)12-35-24(19)20(29)10-17/h7-10,12-13,25,38-40H,14H2,1-6H3,(H,35,36)/t25-/m0/s1	(S)-6-(((1-(tert-butyl)-1H-1,2,3- triazol-4-yl)(6- fluoro-2-methylpyridin-3- yl)methyl)amino)-8- chloro-4-((3,3,3-trifluoro-2,2- dimethylpropyl)amino)quinoline- 3-carbonitrile::US11066414, Compound 715	3	aid1805683	Gilead Sciences, Inc.	158440411
1058593	InChI=1S/C26H17Cl2FN8S/c27-18-7-15(2-3-20(18)29)34-24-14(9-30)10-31-26-17(24)6-16(8-19(26)28)35-25(22-11-33-37-36-22)13-1-4-21-23(5-13)38-12-32-21/h1-8,10-12,25,33,35-37H,(H,31,34)/t25-/m0/s1	(S)-6-((benzo[d]thiazol-6-yl(1H- 1,2,3-triazol-4-yl)methyl)amino)- 8-chloro-4-((3-chloro-4-fluorophenyl)- amino)quinoline-3-carbonitrile::US11066414, Compound 10	21	aid1805683	Gilead Sciences, Inc.	158347456
1058751	InChI=1S/C24H17Cl2F2N9/c1-11-15(2-3-20(26)33-11)23(19-10-32-37-36-19)34-13-4-16-21(35-14-6-18(27)24(28)31-9-14)12(7-29)8-30-22(16)17(25)5-13/h2-6,8-10,23,32,34,36-37H,1H3,(H,30,35)/t23-/m0/s1	(S)-8-chloro-6-(((6-chloro-2- methylpyridin-3-yl)(1H-1,2,3- triazol-4-yl)methyl)amino)-4-((5,6- difluoropyridin-3-yl)amino)quinoline- 3-carbonitrile::US11066414, Compound 169	14	aid1805683	Gilead Sciences, Inc.	158324445
1058798	InChI=1S/C23H17Cl3FN9/c1-36-18(4-5-31-36)23(17-10-30-35-34-17)32-12-6-13-21(11(8-28)9-29-22(13)15(25)7-12)33-16-3-2-14(24)19(26)20(16)27/h2-7,9-10,23,30,32,34-35H,1H3,(H,29,33)/t23-/m1/s1	(S)-8-chloro-4-((3,4-dichloro-2- fluorophenyl)amino)-6-(((1-methyl- 1H-pyrazol-5-yl)(1H-1,2,3-triazol-4- yl)methyl)amino)quinoline-3- carbonitrile::US11066414, Compound 216	38	aid1805683	Gilead Sciences, Inc.	158294793
1059508	InChI=1S/C32H32ClF3N8O/c1-30(2,3)17-39-27-18(14-37)15-38-28-22(27)12-19(13-23(28)33)40-29(21-6-5-7-24-20(21)8-9-26(41-24)45-4)25-16-44(43-42-25)31(10-11-31)32(34,35)36/h5-9,12-13,15-16,29,40,42-43H,10-11,17H2,1-4H3,(H,38,39)/t29-/m0/s1	(S)-8-chloro-6-(((2-methoxyquinolin-5- yl)(1-(1-(trifluoromethyl)cyclopropyl)-1H- 1,2,3-triazol-4-yl)methyl)amino)-4- (neopentylamino)quinoline-3-carbonitrile::US11066414, Compound 930	33	aid1805683	Gilead Sciences, Inc.	158285684
1059471	InChI=1S/C34H35N9O/c1-33(2,3)19-38-30-22(16-36)17-37-29-21(15-35)10-23(11-27(29)30)39-31(28-18-43(41-40-28)34-12-20(13-34)14-34)25-6-5-7-26-24(25)8-9-42(4)32(26)44/h5-11,17-18,20,31,39-41H,12-14,19H2,1-4H3,(H,37,38)/t20?,31-,34?/m0/s1	(S)-6-(((1-(bicyclo[1.1.1]pentan-1-yl)-1H- 1,2,3-triazol-4-yl)(2-methyl-1-oxo-1,2- dihydroisoquinolin-5-yl)methyl)amino)-4- (neopentylamino)quinoline-3,8-dicarbonitrile::US11066414, Compound 891	1	aid1805683	Gilead Sciences, Inc.	158233515
1059081		(S)-8-chloro-6-(((1-(1-(difluoromethyl- )cyclopropyl)-1H-1,2,3-triazol-4- yl)(1H-indazol-4-yl)methyl)amino)-4- (neopentylamino)quinoline-3-carbonitrile::US11066414, Compound 500	8	aid1805683	Gilead Sciences, Inc.	158232865
1058697	InChI=1S/C36H35Cl2FN8S/c1-36(2,3)46-11-8-26(9-12-46)47-20-31(44-45-47)34(22-4-7-32-21(14-22)10-13-48-32)43-25-15-27-33(42-24-5-6-30(39)28(37)16-24)23(18-40)19-41-35(27)29(38)17-25/h4-7,10,13-17,19-20,26,34,43-45H,8-9,11-12H2,1-3H3,(H,41,42)/t34-/m0/s1	8-chloro-6-(((1-cyclopropyl-1H-1,2,3- triazol-4-yl)(5-fluoro-2-methylpyridin-3- yl)methyl-d)amino)-4- (neopentylamino)quinoline-3- carbonitrile::US11066414, Compound 114	10	aid1805683	Gilead Sciences, Inc.	158067097
1059009	InChI=1S/C33H33ClN8/c1-2-29(20-7-4-3-5-8-20)39-31-22(15-35)17-37-32-26(31)13-23(14-28(32)34)38-33(30-19-42(41-40-30)24-11-12-24)25-10-6-9-21-16-36-18-27(21)25/h3-10,13-14,17,19,24,29,33,36,38,40-41H,2,11-12,16,18H2,1H3,(H,37,39)/t29-,33+/m1/s1	6-(((S)-(1-cyclopropyl-1H-1,2,3-triazol-4- yl)(isoindolin-4-yl)methyl)amino)-4-(((R)- 1-phenylpropyl)amino)quinoline-3,8- dicarbonitrile::US11066414, Compound 428	1	aid1805683	Gilead Sciences, Inc.	158064983
1058626	InChI=1S/C35H36Cl2FN9S/c1-35(2,3)46-11-9-23(10-12-46)47-18-29(44-45-47)33(24-5-4-6-30-34(24)41-19-48-30)43-22-13-25-31(42-21-7-8-28(38)26(36)14-21)20(16-39)17-40-32(25)27(37)15-22/h4-8,13-15,17-18,23,33,41,43-45H,9-12,19H2,1-3H3,(H,40,42)/t33-/m0/s1	(S)-6-((benzo[d]thiazol-4-yl(1-(1-(tert- butyl)piperidin-4-yl)-1H-1,2,3-triazol-4- yl)methyl)amino)-8-chloro-4-((3- chloro-4-fluorophenyl)amino)- quinoline-3-carbonitrile::US11066414, Compound 43	33	aid1805683	Gilead Sciences, Inc.	158048949
1059419	InChI=1S/C30H31F4N9/c1-17-21(5-6-24(31)39-17)27(23-14-43(42-41-23)16-29(7-8-29)30(32,33)34)40-20-9-18(11-35)25-22(10-20)26(19(12-36)13-37-25)38-15-28(2,3)4/h5-6,9-10,13-14,27,40-42H,7-8,15-16H2,1-4H3,(H,37,38)/t27-/m0/s1	(S)-6-(((6-fluoro-2- methylpyridin-3-yl)(1-((1- (trifluoromethyl)cyclo- propyl)methyl)-1H-1,2,3- triazol-4-yl)methyl)amino)-4- (neopentylamino)quinoline-3,8- dicarbonitrile::US11066414, Compound 839	6	aid1805683	Gilead Sciences, Inc.	157996374
1058826	InChI=1S/C27H26Cl2FN7O/c1-15(2)37-14-24(35-36-37)26(16-5-7-38-8-6-16)34-19-9-20-25(33-18-3-4-23(30)21(28)10-18)17(12-31)13-32-27(20)22(29)11-19/h3-5,9-11,13-15,26,34-36H,6-8H2,1-2H3,(H,32,33)/t26-/m0/s1	(S)-8-chloro-4-((3-chloro-4- fluorophenyl)amino)- 6-(((3,6-dihydro- 2H-pyran-4-yl)(1-isopropyl- 1H-1,2,3- triazol-4- yl)methyl)amino)quinoline-3- carbonitrile::US11066414, Compound 244	4	aid1805683	Gilead Sciences, Inc.	157985371
1058613	InChI=1S/C26H20ClF2N9/c27-19-7-14(35-25(22-12-34-38-37-22)17-2-1-3-21-16(17)4-5-31-21)6-18-23(13(9-30)10-32-24(18)19)36-15-8-20(28)26(29)33-11-15/h1-3,6-8,10-12,25,31,34-35,37-38H,4-5H2,(H,32,36)/t25-/m0/s1	(S)-8-chloro-4-((5,6-difluoropyridin- 3-yl)amino)-6-((indolin-4-yl(1H- 1,2,3-triazol-4- yl)methyl)amino)quinoline-3- carbonitrile::US11066414, Compound 30	34	aid1805683	Gilead Sciences, Inc.	157964910
1059014	InChI=1S/C32H37N9OS/c1-32(2,3)18-36-30-20(11-34)12-35-29-19(10-33)8-21(9-25(29)30)37-31(27-13-41(39-38-27)22-4-5-22)26-17-43-28-14-40(7-6-24(26)28)23-15-42-16-23/h8-9,12-13,17,22-23,31,37-39H,4-7,14-16,18H2,1-3H3,(H,35,36)/t31-/m0/s1	(S)-6-(((1-cyclopropyl-1H-1,2,3-triazol- 4-yl)(6-(oxetan-3-yl)-4,5,6,7- tetrahydrothieno[2,3-c]pyridin-3- yl)methyl)amino)-4-(neopentylamino)- quinoline-3,8-dicarbonitrile::US11066414, Compound 433	1	aid1805683	Gilead Sciences, Inc.	157938709
1059344	InChI=1S/C29H34ClFN8/c1-17-20(6-7-24(31)35-17)27(23-14-39(38-37-23)16-29(5)8-9-29)36-19-10-21-25(34-15-28(2,3)4)18(12-32)13-33-26(21)22(30)11-19/h6-7,10-11,13-14,27,36-38H,8-9,15-16H2,1-5H3,(H,33,34)/t27-/m0/s1	(S)-8-chloro-6-(((6-fluoro-2- methylpyridin-3- yl)(1-((1-methylcyclopropyl)- methyl)-1H-1,2,3- triazol-4-yl)methyl)amino)-4- (neopentylamino)quinoline- 3-carbonitrile::US11066414, Compound 764	4	aid1805683	Gilead Sciences, Inc.	157903523
1059157	InChI=1S/C33H34N10O/c1-32(2,3)19-39-29-21(16-35)17-38-28-20(15-34)13-22(14-25(28)29)40-30(24-7-4-9-26-23(24)8-5-12-37-26)27-18-43(42-41-27)33(31(36)44)10-6-11-33/h4-5,7-9,12-14,17-18,30,40-42H,6,10-11,19H2,1-3H3,(H2,36,44)(H,38,39)/t30-/m0/s1	(S)-1-(4-(((3,8-dicyano-4-(neopentyl- amino)quinolin-6-yl)amino)(quinolin-5- yl)methyl)-1H-1,2,3-triazol-1- yl)cyclobutane-1-carboxamide::US11066414, Compound 576	1	aid1805683	Gilead Sciences, Inc.	157887388
1058596	InChI=1S/C38H42Cl2FN9/c1-5-48-20-23-7-6-8-28(30(23)21-48)37(34-22-50(47-46-34)27-11-13-49(14-12-27)38(2,3)4)45-26-15-29-35(44-25-9-10-33(41)31(39)16-25)24(18-42)19-43-36(29)32(40)17-26/h6-10,15-17,19,22,27,37,45-47H,5,11-14,20-21H2,1-4H3,(H,43,44)/t37-/m0/s1	(S)-6-(((1-(1-(tert- butyl)piperidin-4-yl)-1H-1,2,3- triazol-4-yl)(2-ethylisoindolin-4- yl)methyl)amino)-8-chloro-4-((3- chloro-4-fluorophenyl)amino)- quinoline-3-carbonitrile::US11066414, Compound 13	11	aid1805683	Gilead Sciences, Inc.	157783565
1059464	InChI=1S/C33H32F3N9O/c1-31(2,33(34,35)36)18-40-28-20(15-38)16-39-27-19(14-37)12-21(13-25(27)28)41-29(26-17-45(43-42-26)32(3)9-10-32)23-6-5-7-24-22(23)8-11-44(4)30(24)46/h5-8,11-13,16-17,29,41-43H,9-10,18H2,1-4H3,(H,39,40)/t29-/m0/s1	(S)-6-(((2-methyl-1-oxo-1,2- dihydroisoquinolin-5- yl)(1-(1-methylcyclopropyl)- 1H-1,2,3-triazol-4- yl)methyl)amino)-4-((3,3,3-trifluoro-2,2- dimethylpropyl)amino)q uin oline-3,8- dicarbonitrile::US11066414, Compound 884	1	aid1805683	Gilead Sciences, Inc.	157766357
1059032	InChI=1S/C31H32F3N9/c1-29(2,3)17-39-27-20(12-36)14-38-26-19(11-35)9-21(10-23(26)27)40-28(22-6-4-5-18-13-37-15-24(18)22)25-16-43(42-41-25)30(7-8-30)31(32,33)34/h4-6,9-10,14,16,28,37,40-42H,7-8,13,15,17H2,1-3H3,(H,38,39)/t28-/m0/s1	(S)-6-((isoindolin-4-yl(1-(1-(trifluoro- methyl)cyclopropyl)-1H-1,2,3-triazol-4- yl)methyl)amino)-4-(neopentylamino)- quinoline-3,8-dicarbonitrile::US11066414, Compound 451	3	aid1805683	Gilead Sciences, Inc.	157736412
1058604	InChI=1S/C32H30Cl2FN9O/c1-18(2)44-17-28(41-42-44)30(19-9-20(15-37-14-19)32(45)43-7-3-4-8-43)40-23-10-24-29(39-22-5-6-27(35)25(33)11-22)21(13-36)16-38-31(24)26(34)12-23/h5-6,9-12,14-18,30,40-42H,3-4,7-8H2,1-2H3,(H,38,39)/t30-/m0/s1	(S)-8-chloro-4-((3-chloro-4- fluorophenyl)amino)- 6-(((1-isopropyl-1H-1,2,3- triazol-4-yl)(5-(pyrrolidine-1- carbonyl)pyridin-3- yl)methyl)amino)quinoline- 3-carbonitrile::US11066414, Compound 21	14	aid1805683	Gilead Sciences, Inc.	157712291
1059465	InChI=1S/C29H30F3N9O/c1-27(2,3)16-37-24-18(13-34)14-36-23-17(12-33)10-19(11-21(23)24)38-25(20-6-5-9-35-26(20)42-4)22-15-41(40-39-22)28(7-8-28)29(30,31)32/h5-6,9-11,14-15,25,38-40H,7-8,16H2,1-4H3,(H,36,37)/t25-/m0/s1	(S)-6-(((2-methoxypyridin-3-yl)(1-(1- (trifluoromethyl)cyclopropyl)-1H-1,2,3- triazol-4-yl)methyl)amino)-4- (neopentylamino)quinoline-3,8-dicarbonitrile::US11066414, Compound 885	10	aid1805683	Gilead Sciences, Inc.	157694933
1059460	InChI=1S/C32H33F2N9O/c1-32(2,3)18-38-29-20(15-36)16-37-28-19(14-35)10-21(11-26(28)29)39-30(27-17-43(41-40-27)22(12-33)13-34)24-6-5-7-25-23(24)8-9-42(4)31(25)44/h5-11,16-17,22,30,39-41H,12-13,18H2,1-4H3,(H,37,38)/t30-/m0/s1	(S)-6-(((1-(l,3-difluoropropan-2-yl)-1H-1,2,3- triazol-4-yl)(2-methyl-1-oxo-1,2- dihydroisoquinolin-5-yl)methyl)amino)-4- (neopentylamino)quinoline-3,8-dicarbonitrile::US11066414, Compound 880	3	aid1805683	Gilead Sciences, Inc.	157666628
1058987	InChI=1S/C30H28Cl2FN9/c1-2-41-9-7-22(16-41)42-17-27(39-40-42)29(18-4-3-8-35-14-18)38-21-10-23-28(37-20-5-6-26(33)24(31)11-20)19(13-34)15-36-30(23)25(32)12-21/h3-6,8,10-12,14-15,17,22,29,38-40H,2,7,9,16H2,1H3,(H,36,37)/t22-,29?/m1/s1	8-chloro-4-((3-chloro-4-fluoro- phenyl)amino)-6-(((1-((R)-1- ethyl pyrrolidin-3-yl)-1H-1,2,3- triazol-4-yl)(pyridin-3-yl)methyl)- amino)quinoline-3-carbonitrile::US11066414, Compound 402	19	aid1805683	Gilead Sciences, Inc.	157647171
1059000	InChI=1S/C34H42ClN9S/c1-33(2,3)19-38-29-21(16-36)17-37-30-25(29)14-22(15-26(30)35)40-31(24-8-7-9-27-32(24)45-20-39-27)28-18-44(42-41-28)23-10-12-43(13-11-23)34(4,5)6/h7-9,14-15,17-18,20,23,31,40-42H,10-13,19H2,1-6H3,(H,37,38)/t31-/m0/s1	(S)-6-((benzo[d]thiazol-7-yl(1-(1- (tert-butyl)piperidin-4-yl)-1H-1,2,3- triazol-4-yl)methyl)amino)-8-chloro- 4-(neopentylamino)quinoline-3- carbonitrile::US11066414, Compound 419	3	aid1805683	Gilead Sciences, Inc.	157602392
1059467	InChI=1S/C34H35N9O/c1-33(2,3)19-38-31-22(16-36)17-37-30-21(15-35)10-23(11-26(30)31)39-32(27-18-43(41-40-27)34-12-20(13-34)14-34)25-6-5-7-28-24(25)8-9-29(44)42(28)4/h5-11,17-18,20,32,39-41H,12-14,19H2,1-4H3,(H,37,38)/t20?,32-,34?/m0/s1	(S)-6-(((1-(bicyclo[1.1.1]pentan- 1-yl)-1H-1,2,3- triazol-4-yl)(1-methyl-2-oxo-1,2- dihydroquinolin-5-yl)methyl)amino)-4- (neopentylamino)quinoline-3,8-dicarbonitrile::US11066414, Compound 887	3	aid1805683	Gilead Sciences, Inc.	157459990
1059229	InChI=1S/C28H32ClFN8O2/c1-16-19(5-6-23(30)34-16)26(22-11-38(37-36-22)28(13-39)14-40-15-28)35-18-7-20-24(33-12-27(2,3)4)17(9-31)10-32-25(20)21(29)8-18/h5-8,10-11,26,35-37,39H,12-15H2,1-4H3,(H,32,33)/t26-/m0/s1	(S)-8-chloro-6-(((6-fluoro-2- methylpyridin-3-yl)(1- (3-(hydroxymethyl)oxetan- 3-yl)-1H-1,2,3-triazol-4- yl)methyl)amino)-4- (neopentylamino)quinoline-3- carbonitrile::US11066414, Compound 648	3	aid1805683	Gilead Sciences, Inc.	157427961
1058787	InChI=1S/C26H19ClF5N9/c1-13(26(30,31)32)41-12-21(39-40-41)23(14-3-2-4-34-9-14)37-16-5-18-22(38-17-7-20(28)25(29)36-11-17)15(8-33)10-35-24(18)19(27)6-16/h2-7,9-13,23,37,39-40H,1H3,(H,35,38)/t13?,23-/m0/s1	8-chloro-4-((5,6-difluoropyridin-3- yl)amino)-6-(((S)-pyridin-3-yl(1-((R)- 1,1,1-trifluoropropan-2-yl)-1H-1,2,3- triazol-4-yl)methyl)amino)quinoline-3- carbonitrile::US11066414, Compound 205	72	aid1805683	Gilead Sciences, Inc.	157244166
1058766	InChI=1S/C30H31ClN8O/c1-19(2)39-18-27(37-38-39)29(21-9-6-11-33-16-21)35-23-13-24-28(22(15-32)17-34-30(24)25(31)14-23)36-26(10-12-40)20-7-4-3-5-8-20/h3-9,11,13-14,16-19,26,29,35,37-38,40H,10,12H2,1-2H3,(H,34,36)/t26?,29-/m0/s1	8-chloro-4-(((S)-3-hydroxy-1- phenylpropyl)amino)-6-(((S)-(1- isopropyl-1H-1,2,3-triazol-4- yl)(pyridin-3-l)methyl)amino)- quinoline-3-carbonitrile::US11066414, Compound 184	8	aid1805683	Gilead Sciences, Inc.	157199550
1058809	InChI=1S/C25H18Cl3FN8/c1-12-15(3-2-6-31-12)25(20-11-33-37-36-20)34-14-7-16-23(13(9-30)10-32-24(16)18(27)8-14)35-19-5-4-17(26)21(28)22(19)29/h2-8,10-11,25,33-34,36-37H,1H3,(H,32,35)/t25-/m0/s1	(S)-8-chloro-4-((3,4-dichloro-2- fluorophenyl)amino)-6-(((2- methylpyridin-3-yl)(1H-1,2,3- triazol-4-yl)methyl)amino)- quinoline-3- carbonitrile::US11066414, Compound 227	44	aid1805683	Gilead Sciences, Inc.	157175067
1058755	InChI=1S/C24H18ClF2N9/c1-12-16(3-2-4-29-12)23(20-11-32-36-35-20)33-14-5-17-21(34-15-7-19(26)24(27)31-10-15)13(8-28)9-30-22(17)18(25)6-14/h2-7,9-11,23,32-33,35-36H,1H3,(H,30,34)/t23-/m0/s1	(S)-8-chloro-4-((5,6-difluoropyridin- 3-yl)amino)-6-(((2-methylpyridin-3- yl)(1H-1,2,3-triazol-4- yl)methyl)amino)quinoline-3- carbonitrile::US11066414, Compound 173	7	aid1805683	Gilead Sciences, Inc.	157155208
1059540	InChI=1S/C29H32ClF3N8O/c1-15-18(6-7-21(31)37-15)24(25-26(42-5)41(40-39-25)29(8-9-29)27(32)33)38-17-10-19-22(36-14-28(2,3)4)16(12-34)13-35-23(19)20(30)11-17/h6-7,10-11,13,24,27,38-40H,8-9,14H2,1-5H3,(H,35,36)/t24-/m0/s1	(S)-8-chloro-6-(((1-(1- (difluoromethyl)cyclopropyl)-5-methoxy- 1H-1,2,3-triazol-4-yl)(6-fluoro-2- methylpyridin-3-yl)methyl)amino)-4- (neopentylamino)quinoline-3-carbonitrile::US11066414, Compound 965	4	aid1805683	Gilead Sciences, Inc.	157141427
1059315		(S)-6-(((1-(bicyclo[1.1.1]pentan- 1-yl)-1H-1,2,3-triazol- 4-yl)(1-methyl-1H-indol-4- yl)methyl)amino)-8-chloro- 4-(neopentylamino)quinoline-3- carbonitrile::US11066414, Compound 735	47	aid1805683	Gilead Sciences, Inc.	157132482
1059185	InChI=1S/C29H33ClF2N8/c1-5-22-19(7-6-10-34-22)26(23-15-40(39-38-23)29(8-9-29)27(31)32)37-18-11-20-24(36-16-28(2,3)4)17(13-33)14-35-25(20)21(30)12-18/h6-7,10-12,14-15,26-27,37-39H,5,8-9,16H2,1-4H3,(H,35,36)/t26-/m0/s1	(S)-8-chloro-6-(((1-(1-(difluoromethyl)cyclo- propyl)-1H-1,2,3-triazol-4-yl)(2-ethylpyridin- 3-yl)methyl)amino)-4-(neopentylamino)- quinoline-3-carbonitrile::US11066414, Compound 604	3	aid1805683	Gilead Sciences, Inc.	157073542
1059079	InChI=1S/C31H33ClF2N8O/c1-30(2,3)16-37-25-18(12-35)13-36-26-21(25)10-19(11-22(26)32)38-27(20-7-5-6-17-14-41(4)28(43)24(17)20)23-15-42(40-39-23)31(8-9-31)29(33)34/h5-7,10-11,13,15,27,29,38-40H,8-9,14,16H2,1-4H3,(H,36,37)/t27-/m0/s1	(S)-8-chloro-6-(((1-(1-(difluoromethyl)- cyclopropyl)-1H-1,2,3-triazol-4-yl)(2- methyl-3-oxoisoindolin-4-yl)methyl)- amino)-4-(neopentylamino)quinoline- 3-carbonitrile::US11066414, Compound 498	19	aid1805683	Gilead Sciences, Inc.	157052866
1058589	InChI=1S/C30H27Cl4FN8S/c1-2-42-7-5-19(6-8-42)43-15-25(40-41-43)29(21-12-26(33)44-30(21)34)39-18-9-20-27(38-17-3-4-24(35)22(31)10-17)16(13-36)14-37-28(20)23(32)11-18/h3-4,9-12,14-15,19,29,39-41H,2,5-8H2,1H3,(H,37,38)/t29-/m0/s1	(S)-8-chloro-4-((3-chloro-4- fluorophenyl)amino)-6-(((2,5- dichlorothiophen-3-yl)(1-(1- ethylpiperidin-4-yl)-1H-1,2,3- triazol-4-yl)methyl)amino)quinoline- 3-carbonitrile::US11066414, Compound 5	9	aid1805683	Gilead Sciences, Inc.	153180285
1059462	InChI=1S/C35H34F3N9O/c1-33(2,35(36,37)38)19-42-30-21(16-40)17-41-29-20(15-39)13-23(14-27(29)30)43-31(25-5-4-6-26-24(25)9-12-46(3)32(26)48)28-18-47(45-44-28)34(10-11-34)22-7-8-22/h4-6,9,12-14,17-18,22,31,43-45H,7-8,10-11,19H2,1-3H3,(H,41,42)/t31-/m0/s1	(S)-6-(((1-([1,1'-bi(cyclopropan)]- 1-yl)-1H-1,2,3- triazol-4-yl)(2-methyl-1-oxo-1,2- dihydroisoquinolin-5-yl)methyl)amino)-4- ((3,3,3-trifluoro-2,2- dimethylpropyl)amino)quinoline- 3,8-dicarbonitrile::US11066414, Compound 882	2	aid1805683	Gilead Sciences, Inc.	153059116
1058598	InChI=1S/C38H40Cl2FN9O2/c1-38(2,3)49-11-9-26(10-12-49)50-20-33(46-47-50)37(27-6-4-5-22-18-48(19-29(22)27)34(52)21-51)45-25-13-28-35(44-24-7-8-32(41)30(39)14-24)23(16-42)17-43-36(28)31(40)15-25/h4-8,13-15,17,20,26,37,45-47,51H,9-12,18-19,21H2,1-3H3,(H,43,44)/t37-/m0/s1	(S)-6-(((1-(1-(tert-butyl)piperidin-4- yl)-1H-1,2,3-triazol-4-yl)(2-(2- hydroxyacetyl)isoindolin-4-yl)methyl)- amino)-8-chloro-4-((3-chloro-4- fluorophenyl)amino)quinoline-3- carbonitrile::US11066414, Compound 15	2	aid1805683	Gilead Sciences, Inc.	149242179
1058791	InChI=1S/C25H17ClF5N9/c26-18-5-15(36-22(13-2-1-3-33-8-13)20-11-40(39-38-20)12-25(29,30)31)4-17-21(14(7-32)9-34-23(17)18)37-16-6-19(27)24(28)35-10-16/h1-6,8-11,22,36,38-39H,12H2,(H,34,37)/t22-/m0/s1	(S)-8-chloro-4-((5,6-difluoropyridin- 3-yl)amino)-6-((pyridin-3-yl(1-(2,2,2- trifluoroethyl)-1H-1,2,3-triazol-4- yl)methyl)amino)quinoline-3- carbonitrile::US11066414, Compound 209	23	aid1805683	Gilead Sciences, Inc.	148639420
1058698	InChI=1S/C35H32Cl2FN9/c1-2-46-12-9-26(10-13-46)47-20-32(44-45-47)34(22-6-5-21-4-3-11-40-31(21)14-22)43-25-15-27-33(42-24-7-8-30(38)28(36)16-24)23(18-39)19-41-35(27)29(37)17-25/h3-8,11,14-17,19-20,26,34,43-45H,2,9-10,12-13H2,1H3,(H,41,42)/t34-/m0/s1	8-chloro-6-(((S)-(1-cyclopropyl-1H- 1,2,3-triazol-4-yl)(6-fluoropyridin-3- yl)methyl-d)amino)-4-((1-phenylpropyl- 2,2,3,3,3-d5)amino)quinoline-3- carbonitrile::US11066414, Compound 115	5	aid1805683	Gilead Sciences, Inc.	148510123
1059057	InChI=1S/C28H29ClFN9/c1-16-19(5-6-23(30)35-16)26(22-13-39(38-37-22)28(14-32)7-8-28)36-18-9-20-24(34-15-27(2,3)4)17(11-31)12-33-25(20)21(29)10-18/h5-6,9-10,12-13,26,36-38H,7-8,15H2,1-4H3,(H,33,34)/t26-/m0/s1	(S)-8-chloro-6-(((1-(1- cyanocyclopropyl)-1H- 1,2,3-triazol-4-yl)(6- fluoro-2-methylpyridin- 3-yl)methyl)amino)-4- (neopentylamino)- quinoline-3-carbonitrile::US11066414, Compound 476	3	aid1805683	Gilead Sciences, Inc.	148493544
1058651	InChI=1S/C34H32ClN9/c35-29-15-24(40-34(31-20-44(43-42-31)25-11-12-25)26-9-4-8-22-17-38-19-28(22)26)14-27-32(23(16-37)18-39-33(27)29)41-30(10-5-13-36)21-6-2-1-3-7-21/h1-4,6-9,14-15,18,20,25,30,34,38,40,42-43H,5,10-12,17,19H2,(H,39,41)/t30-,34+/m1/s1	8-chloro-4-(((R)-3-cyano-1-phenyl- propyl)amino)-6-(((S)-(1-cyclopropyl- 1H-1,2,3-triazol-4-yl)(isoindolin-4- yl)methyl)amino)quinoline-3- carbonitrile::US11066414, Compound 68	1	aid1805683	Gilead Sciences, Inc.	148041676
1058753	InChI=1S/C30H29ClN8O/c1-18(20-7-4-3-5-8-20)35-28-21(13-32)14-34-29-25(28)11-22(12-26(29)31)36-30(24-9-6-10-33-19(24)2)27-15-39(38-37-27)23-16-40-17-23/h3-12,14-15,18,23,30,36-38H,16-17H2,1-2H3,(H,34,35)/t18-,30+/m1/s1	8-chloro-6-(((S)-(2-methylpyridin-3- yl)(1-(oxetan-3-yl)-1H-1,2,3-triazol-4- yl)methyl)amino)-4-(((R)-1-phenyl ethyl)amino)quinoline-3-carbonitrile::US11066414, Compound 171	10	aid1805683	Gilead Sciences, Inc.	147196195
1058649	InChI=1S/C30H28F3N9S/c1-28(2,3)15-37-25-18(12-35)13-36-24-17(11-34)9-19(10-21(24)25)39-26(20-5-4-6-22-27(20)43-16-38-22)23-14-42(41-40-23)29(7-8-29)30(31,32)33/h4-6,9-10,13-14,16,26,39-41H,7-8,15H2,1-3H3,(H,36,37)/t26-/m0/s1	(S)-6-((benzo[d]thiazol-7-yl(1-(1- (trifluoromethyl)cyclopropyl)-1H- 1,2,3-triazol-4-yl)methyl)amino)-4- (neopentylamino)quinoline- 3,8-dicarbonitrile::US11066414, Compound 66	3	aid1805683	Gilead Sciences, Inc.	147114291
1058609	InChI=1S/C32H37ClN8O/c1-32(2,3)18-36-29-20(11-34)12-35-30-25(29)9-21(10-27(30)33)37-31(28-15-41(39-38-28)22-7-8-22)24-6-4-5-19-13-40(14-26(19)24)23-16-42-17-23/h4-6,9-10,12,15,22-23,31,37-39H,7-8,13-14,16-18H2,1-3H3,(H,35,36)/t31-/m0/s1	(S)-8-chloro-6-(((1-cyclopropyl-1H- 1,2,3-triazol-4-yl)(2- (oxetan-3-yl)isoindolin-4- yl)methyl)amino)-4- (neopentylamino)quinoline-3- carbonitrile::US11066414, Compound 26	6	aid1805683	Gilead Sciences, Inc.	147015141
1058790	InChI=1S/C32H33ClF2N10/c1-32(2,3)44-9-6-23(7-10-44)45-18-27(42-43-45)29(19-5-4-8-37-15-19)40-21-11-24-28(41-22-13-26(34)31(35)39-17-22)20(14-36)16-38-30(24)25(33)12-21/h4-5,8,11-13,15-18,23,29,40,42-43H,6-7,9-10H2,1-3H3,(H,38,41)/t29-/m0/s1	(S)-6-(((Hl-(tert-butyl)piperidin-4-yl)- 1H-1,2,3-triazol-4-yl)(pyridin-3- yl)methyl)amino)-8-chloro-4-((5,6- difluoropyridin-3-yl)amino)quinoline- 3-carbonitrile::US11066414, Compound 208	12	aid1805683	Gilead Sciences, Inc.	146718080
1058951	InChI=1S/C25H19Cl2FN8/c1-36-13-22(34-35-36)24(14-3-2-6-30-11-14)33-17-7-18-23(32-16-4-5-21(28)19(26)8-16)15(10-29)12-31-25(18)20(27)9-17/h2-9,11-13,24,33-35H,1H3,(H,31,32)	8-chloro-4-((3-chloro-4-fluoro- phenyl)amino)-6-(((1-methyl-1H- 1,2,3-triazol-4-yl)(pyridin-3- yl)methyl)amino)quinoline-3- carbonitrile::US11066414, Compound 395	4	aid1805683	Gilead Sciences, Inc.	146559390
1058802	InChI=1S/C28H27ClN8/c1-3-24(18-8-5-4-6-9-18)35-26-19(14-30)15-32-27-22(26)12-20(13-23(27)29)34-28(25-16-33-37-36-25)21-10-7-11-31-17(21)2/h4-13,15-16,24,28,33-34,36-37H,3H2,1-2H3,(H,32,35)/t24-,28+/m1/s1	8-chloro-6-(((S)-(2-methylpyridin-3- yl)(1H-1,2,3-triazol-4- yl)methyl)amino)-4-(((R)-1- phenylpropyl)amino)quinoline-3- carbonitrile::US11066414, Compound 220	4	aid1805683	Gilead Sciences, Inc.	140899567
1058794	InChI=1S/C34H41ClN9/c1-5-30(24-12-9-8-10-13-24)40-32-26(20-36)22-38-34-28(32)18-27(19-29(34)35)39-33(25-14-11-15-37-21-25)31-23-43(42-41-31)16-17-44(4,6-2)7-3/h8-15,18-19,21-23,30,33,39,41-42H,5-7,16-17H2,1-4H3,(H,38,40)/t30-,33+/m1/s1	2-(4-((S)-((8-chloro-3-cyano-4-(((R)- 1-phenylpropyl)amino)quinolin-6- yl)amino)(pyridin-3-yl)methyl)-1H- 1,2,3-triazol-1-yl)-N,N-diethyl-N- methylethan-1-aminium::US11066414, Compound 212	44	aid1805683	Gilead Sciences, Inc.	140840373
512038	InChI=1S/C25H19F3N8/c26-15-3-1-14(2-4-15)23(22-12-36(35-34-22)18-6-7-18)32-16-5-8-21-19(9-16)25(31-13-30-21)33-17-10-20(27)24(28)29-11-17/h1-5,8-13,18,23,32H,6-7H2,(H,30,31,33)	(S)-N6-((1- cyclopropyl-1H- 1,2,3-triazol-4-yl)(4- fluorophenyl)methyl- d)-N4-(5,6- difluoropyridin-3- yl)quinazoline-4,6- diamine::US10059695, II-11::US10577352, Compound II-11	74	aid1795424	Gilead Sciences Inc	136213711
512036	InChI=1S/C30H28Cl3FN8/c1-2-41-11-9-22(10-12-41)42-16-27(39-40-42)28(18-3-5-19(31)6-4-18)37-21-13-23-29(25(33)15-21)35-17-36-30(23)38-20-7-8-26(34)24(32)14-20/h3-8,13-17,22,28,37H,2,9-12H2,1H3,(H,35,36,38)/t28-/m0/s1	(S)-8-chloro-N4-(3- chloro-4- fluorophenyl)-N6- ((4-chlorophenyl)(1- (1-ethylpiperidin-4- yl)-1H-1,2,3-triazol- 4-yl)methyl) quinazoline- 4,6-diamine::US10059695, II-10::US10577352, Compound II-10	17	aid1795424	Gilead Sciences Inc	136213710
512034	InChI=1S/C28H25Cl2FN8/c29-22-13-18(6-7-24(22)31)36-28-21-12-19(14-23(30)27(21)33-16-34-28)35-26(17-4-2-1-3-5-17)25-15-39(38-37-25)20-8-10-32-11-9-20/h1-7,12-16,20,26,32,35H,8-11H2,(H,33,34,36)/t26-/m0/s1	(S)-8-chloro-N4-(3- chloro-4- fluorophenyl)-N6- (phenyl(1-(piperidin- 4-yl)-1H-1,2,3- triazol-4- yl)methyl) quinazoline- 4,6-diamine::US10059695, II-9::US10577352, Compound II-9	8.3	aid1795424	Gilead Sciences Inc	136213709
512030	InChI=1S/C28H25Cl2FN8/c29-18-3-1-17(2-4-18)27(26-15-39(38-37-26)21-9-11-32-12-10-21)35-19-6-8-25-22(13-19)28(34-16-33-25)36-20-5-7-24(31)23(30)14-20/h1-8,13-16,21,27,32,35H,9-12H2,(H,33,34,36)/t27-/m0/s1	(S)-N4-(3-chloro-4- fluorophenyl)-N6- ((4-chlorophenyl)(1- (piperidin-4-yl)-1H- 1,2,3-triazol-4- yl)methyl) quinazoline- 4,6-diamine::US10059695, II-6::US10577352, Compound II-6	49	aid1795424	Gilead Sciences Inc	136213706
512029	InChI=1S/C32H33Cl2FN8/c1-32(2,3)42-14-12-24(13-15-42)43-18-29(40-41-43)30(20-4-6-21(33)7-5-20)38-22-9-11-28-25(16-22)31(37-19-36-28)39-23-8-10-27(35)26(34)17-23/h4-11,16-19,24,30,38H,12-15H2,1-3H3,(H,36,37,39)/t30-/m0/s1	(S)-N6-((1-(1-(tert- butyl)piperidin-4- yl)-1H-1,2,3-triazol- 4-yl)(4- chlorophenyl) methyl)-N4-(3- chloro-4- fluorophenyl) quinazoline- 4,6-diamine::US10059695, II-5::US10577352, Compound II-5	72	aid1795424	Gilead Sciences Inc	136213705
876763	InChI=1S/C30H29Cl2FN8/c1-2-40-12-10-22(11-13-40)41-17-27(38-39-41)28(19-6-4-3-5-7-19)36-21-14-23-29(25(32)16-21)34-18-35-30(23)37-20-8-9-26(33)24(31)15-20/h3-9,14-18,22,28,36H,2,10-13H2,1H3,(H,34,35,37)/t28-/m0/s1	(S)-8-chloro-N4-(3- chloro-4- fluorophenyl)-N6- ((1-(1- ethylpiperidin-4-yl)- 1H-1,2,3-triazol-4- yl)(phenyl)methyl) quinazoline-4,6- diamine::US10059695, II-4::US10577352, Compound II-4	5.9	aid1804197	Gilead Sciences, Inc.	136213704
512026	InChI=1S/C30H29Cl2FN8/c1-2-40-12-10-22(11-13-40)41-17-27(38-39-41)28(19-6-4-3-5-7-19)36-21-14-23-29(25(32)16-21)34-18-35-30(23)37-20-8-9-26(33)24(31)15-20/h3-9,14-18,22,28,36H,2,10-13H2,1H3,(H,34,35,37)	8-chloro-N4-(3- chloro-4- fluorophenyl)-N6- ((1-(1- ethylpiperidin-4-yl)- 1H-1,2,3-triazol-4- yl)(phenyl)methyl) quinazoline-4,6- diamine::US10059695, II-3::US10577352, Compound II-3	19	aid1795424	Gilead Sciences Inc	136213703
512025	InChI=1S/C28H25Cl2FN8/c29-22-13-18(6-7-24(22)31)36-28-21-12-19(14-23(30)27(21)33-16-34-28)35-26(17-4-2-1-3-5-17)25-15-39(38-37-25)20-8-10-32-11-9-20/h1-7,12-16,20,26,32,35H,8-11H2,(H,33,34,36)	8-chloro-N4-(3- chloro-4- fluorophenyl)-N6- (phenyl(1-(piperidin- 4-yl)-1H-1,2,3- triazol-4- yl)methyl) quinazoline- 4,6-diamine::US10059695, II-2::US10577352, Compound II-2	28	aid1795424	Gilead Sciences Inc	136213702
876758	InChI=1S/C31H33ClN8O/c1-30(2,3)16-33-28-23-10-19(11-24(32)26(23)34-17-35-28)36-27(25-15-40(38-37-25)31-12-18(13-31)14-31)21-6-5-7-22-20(21)8-9-39(4)29(22)41/h5-11,15,17-18,27,36H,12-14,16H2,1-4H3,(H,33,34,35)/t18?,27-,31?/m0/s1	(S)-5-((1- (bicyclo[1.1.1]pentan- 1-yl)-1H-1,2,3- triazol-4-yl)((8- chloro-4- (neopentylamino) quinazolin-6- yl)amino)methyl)-2- methylisoquinolin- 1(2H)-one::US10059695, I-27::US10577352, Compound I-27	1.7	aid1804197	Gilead Sciences, Inc.	136213700
876756	InChI=1S/C30H31ClF2N8O/c1-29(2,3)15-34-26-21-12-17(13-22(31)24(21)35-16-36-26)37-25(23-14-41(39-38-23)30(9-10-30)28(32)33)19-6-5-7-20-18(19)8-11-40(4)27(20)42/h5-8,11-14,16,25,28,37H,9-10,15H2,1-4H3,(H,34,35,36)/t25-/m0/s1	(S)-5-(((8-chloro-4- (neopentylamino) quinazolin-6- yl)amino)(1-(1- (difluoromethyl) cyclopropyl)-1H-1,2,3- triazol-4-yl)methyl)- 2-methylisoquinolin- 1(2H)-one::US10059695, I-25::US10577352, Compound I-25	2.4	aid1804197	Gilead Sciences, Inc.	136213699
512018	InChI=1S/C31H31F2N9O/c1-30(2,3)16-35-27-23-13-19(12-18(14-34)25(23)36-17-37-27)38-26(24-15-42(40-39-24)31(9-10-31)29(32)33)21-6-5-7-22-20(21)8-11-41(4)28(22)43/h5-8,11-13,15,17,26,29,38H,9-10,16H2,1-4H3,(H,35,36,37)/t26-/m0/s1	(S)-6-(((1-(1- (difluoromethyl) cyclopropyl)-1H-1,2,3- triazol-4-yl)(2- methyl-1-oxo-1,2- dihydroisoquinolin- 5-yl)methyl)amino)- 4- (neopentylamino) quinazoline-8- carbonitrile::US10059695, I-24::US10577352, Compound I-24	1.2	aid1795424	Gilead Sciences Inc	136213698
512017	InChI=1S/C28H29ClF2N8/c1-16-17(12-32)6-5-7-19(16)24(22-13-39(38-37-22)28(8-9-28)26(30)31)36-18-10-20-23(21(29)11-18)34-15-35-25(20)33-14-27(2,3)4/h5-7,10-11,13,15,24,26,36H,8-9,14H2,1-4H3,(H,33,34,35)/t24-/m0/s1	(S)-3-(((8-chloro-4- (neopentylamino) quinazolin-6- yl)amino)(1-(1- (difluoromethyl) cyclopropyl)-1H-1,2,3- triazol-4-yl)methyl)- 2-methylbenzonitrile::US10059695, I-23::US10577352, Compound I-23	1.6	aid1795424	Gilead Sciences Inc	136213697
512015	InChI=1S/C27H28F3N9/c1-15-18(5-6-21(28)35-15)23(20-12-39(38-37-20)27(7-8-27)25(29)30)36-17-9-16(11-31)22-19(10-17)24(34-14-33-22)32-13-26(2,3)4/h5-6,9-10,12,14,23,25,36H,7-8,13H2,1-4H3,(H,32,33,34)/t23-/m0/s1	(S)-6-(((1-(1- (difluoromethyl) cyclopropyl)-1H-1,2,3- triazol-4-yl)(6- fluoro-2- methylpyridin-3- yl)methyl)amino)-4- (neopentylamino) quinazoline-8- carbonitrile::US10059695, I-22::US10577352, Compound I-22	1.7	aid1795424	Gilead Sciences Inc	136213696
876749	InChI=1S/C26H28ClF3N8/c1-14-16(5-6-20(28)34-14)22(19-11-38(37-36-19)26(7-8-26)24(29)30)35-15-9-17-21(18(27)10-15)32-13-33-23(17)31-12-25(2,3)4/h5-6,9-11,13,22,24,35H,7-8,12H2,1-4H3,(H,31,32,33)/t22-/m0/s1	(S)-8-chloro-N6-((1- (1- (difluoromethyl) cyclopropyl)-1H-1,2,3- triazol-4-yl)(6- fluoro-2- melhylpyridin-3- yl)methyl)-N4- neopentylquinazoline- 4,6-diamine::US10059695, I-21::US10577352, Compound I-21	1.9	aid1804197	Gilead Sciences, Inc.	136213695
876747	InChI=1S/C27H26ClN9/c1-26(2,3)15-31-25-20-11-18(10-17(12-29)23(20)32-16-33-25)34-24(19-6-4-5-7-21(19)28)22-13-37(36-35-22)27(14-30)8-9-27/h4-7,10-11,13,16,24,34H,8-9,15H2,1-3H3,(H,31,32,33)	(S)-6-(((2- chlorophenyl)(1-(1- cyanocyclopropyl)- 1H-1,2,3-triazol-4- yl)methyl-d)amino)- 4- (neopentylamino) quinazoline-8- carbonitrile::US10059695, I-20::US10577352, Compound I-20	3.3	aid1804197	Gilead Sciences, Inc.	136213694
876745	InChI=1S/C26H27ClN8/c1-26(2,3)14-29-25-20-11-17(10-16(12-28)23(20)30-15-31-25)32-24(19-6-4-5-7-21(19)27)22-13-35(34-33-22)18-8-9-18/h4-7,10-11,13,15,18,24,32H,8-9,14H2,1-3H3,(H,29,30,31)	(S)-6-(((2- chlorophenyl)(1- cyclopropyl-1H- 1,2,3-triazol-4- yl)methyl-d)amino)- 4- (neopentylamino) quinazoline-8- carbonitrile::US10059695, I-19::US10577352, Compound I-19	2.4	aid1804197	Gilead Sciences, Inc.	136213693
512007	InChI=1S/C27H26BrF3N8S/c1-25(2,3)12-32-24-17-9-15(10-18(28)21(17)33-13-34-24)36-22(16-5-4-6-19-23(16)40-14-35-19)20-11-39(38-37-20)26(7-8-26)27(29,30)31/h4-6,9-11,13-14,22,36H,7-8,12H2,1-3H3,(H,32,33,34)/t22-/m0/s1	(S)-N6- (benzo[d]thiazol-7- yl(1-(1- (trifluoromethyl) cyclopropyl)-1H-1,2,3- triazol-4-yl)methyl)- 8-bromo-N4- neopentylquinazoline- 4,6-diamine::US10059695, I-18::US10577352, Compound I-18	8	aid1795424	Gilead Sciences Inc	136213692
512005	InChI=1S/C28H26F3N9S/c1-26(2,3)13-33-25-19-10-17(9-16(11-32)22(19)34-14-35-25)37-23(18-5-4-6-20-24(18)41-15-36-20)21-12-40(39-38-21)27(7-8-27)28(29,30)31/h4-6,9-10,12,14-15,23,37H,7-8,13H2,1-3H3,(H,33,34,35)/t23-/m0/s1	(S)-6- ((benzo[d]thiazol-7- yl(1-(1- (trifluoromethyl) cyclopropyl)-1H- 1,2,3-triazol-4- yl)methyl)amino)-4- (neopentylamino) quinazoline-8- carbonitrile::US10059695, I-17::US10577352, Compound I-17	3.3	aid1795424	Gilead Sciences Inc	136213691
876739	InChI=1S/C26H28ClF2N7/c1-25(2,3)14-30-24-19-10-18(11-20(27)23(19)31-15-32-24)33-22(16-4-6-17(29)7-5-16)21-12-36(35-34-21)26(13-28)8-9-26/h4-7,10-12,15,22,33H,8-9,13-14H2,1-3H3,(H,30,31,32)	(S)-8-chloro-N6-((1- (1- (fluoromethyl) cyclopropyl)-1H- 1,2,3-triazol-4-yl)(4- fluorophenyl)methyl- d)-N4- neopentylquinazoline- 4,6-diamine::US10059695, I-16::US10577352, Compound I-16	3.1	aid1804197	Gilead Sciences, Inc.	136213690
876737	InChI=1S/C25H27BrFN7/c1-25(2,3)13-28-24-19-10-17(11-20(26)23(19)29-14-30-24)31-22(15-4-6-16(27)7-5-15)21-12-34(33-32-21)18-8-9-18/h4-7,10-12,14,18,22,31H,8-9,13H2,1-3H3,(H,28,29,30)	(S)-8-bromo-N6-((1- cyclopropyl-1H- 1,2,3-triazol-4-yl)(4- fluorophenyl)methyl- d)-N4- neopentylquinazoline- 4,6-diamine::US10059695, I-15::US10577352, Compound I-15	2.6	aid1804197	Gilead Sciences, Inc.	136213689
876735	InChI=1S/C26H27FN8/c1-26(2,3)14-29-25-21-11-19(10-17(12-28)23(21)30-15-31-25)32-24(16-4-6-18(27)7-5-16)22-13-35(34-33-22)20-8-9-20/h4-7,10-11,13,15,20,24,32H,8-9,14H2,1-3H3,(H,29,30,31)	(S)-6-(((1- cyclopropyl-1H- 1,2,3-triazol-4-yl)(4- fluorophenyl)methyl- d)amino)-4- (neopentylamino) quinazoline-8- carbonitrile::US10059695, I-14::US10577352, Compound I-14	2.1	aid1804197	Gilead Sciences, Inc.	136213688
876733	InChI=1S/C26H26ClF4N7/c1-24(2,3)13-32-23-18-10-17(11-19(27)22(18)33-14-34-23)35-21(15-4-6-16(28)7-5-15)20-12-38(37-36-20)25(8-9-25)26(29,30)31/h4-7,10-12,14,21,35H,8-9,13H2,1-3H3,(H,32,33,34)	(S)-8-chloro-N6-((4- fluorophenyl)(1-(1- (trifluoromethyl) cyclopropyl)-1H-1,2,3- triazol-4-yl)methyl- d)-N4- neopentylquinazoline- 4,6-diamine::US10059695, I-13::US10577352, Compound I-13	10	aid1804197	Gilead Sciences, Inc.	136213687
511993	InChI=1S/C30H26ClFN8/c31-25-16-22(36-28(20-8-10-21(32)11-9-20)27-17-40(39-38-27)23-12-13-23)15-24-29(25)34-18-35-30(24)37-26(7-4-14-33)19-5-2-1-3-6-19/h1-3,5-6,8-11,15-18,23,26,28,36H,4,7,12-13H2,(H,34,35,37)/t26-,28?/m1/s1	(R)-4-((8-chloro-6- (((S)-(1-cyclopropyl- 1H-1,2,3-triazol-4- yl)(4- fluorophenyl)methyl- d)amino)quinazolin- 4-yl)amino)-4- phenylbutanenitrile::US10059695, I-11::US10577352, Compound I-11	46	aid1795424	Gilead Sciences Inc	136213685
511991	InChI=1S/C24H25Cl2N7O2/c1-24(2,3)12-27-23-16-8-14(9-18(26)21(16)28-13-29-23)30-22(15-6-4-5-7-17(15)25)19-10-33(32-31-19)11-20(34)35/h4-10,13,22,30H,11-12H2,1-3H3,(H,34,35)(H,27,28,29)	(S)-2-(4-(((8-chloro- 4- (neopentylamino) quinazolin-6- yl)amino)(2- chlorophenyl)methyl- d)-1H-1,2,3-triazol- 1-yl)acetic acid::US10059695, I-10::US10577352, Compound I-10	13	aid1795424	Gilead Sciences Inc	136213684
876725	InChI=1S/C25H27Cl2N7/c1-25(2,3)13-28-24-18-10-15(11-20(27)22(18)29-14-30-24)31-23(17-6-4-5-7-19(17)26)21-12-34(33-32-21)16-8-9-16/h4-7,10-12,14,16,23,31H,8-9,13H2,1-3H3,(H,28,29,30)	(S)-8-chloro-N6-((2- chlorophenyl)(1- cyclopropyl-1H- 1,2,3-triazol-4- yl)methyl-d)-N4- neopentylquinazoline- 4,6-diamine::US10059695, I-9::US10577352, Compound I-9	4.8	aid1804197	Gilead Sciences, Inc.	136213683
511987	InChI=1S/C25H28ClN7/c1-25(2,3)14-27-24-19-12-16(8-11-21(19)28-15-29-24)30-23(18-6-4-5-7-20(18)26)22-13-33(32-31-22)17-9-10-17/h4-8,11-13,15,17,23,30H,9-10,14H2,1-3H3,(H,27,28,29)/t23-/m0/s1	(S)-N6-((2- chlorophenyl)(1- cyclopropyl-1H- 1,2,3-triazol-4- yl)methyl)-N4- neopentylquinazoline- 4,6-diamine::US10059695, I-8::US10577352, Compound I-8	13	aid1795424	Gilead Sciences Inc	136213682
876721	InChI=1S/C26H28N8/c1-26(2,3)15-28-25-21-12-19(7-10-22(21)29-16-30-25)31-24(18-6-4-5-17(11-18)13-27)23-14-34(33-32-23)20-8-9-20/h4-7,10-12,14,16,20,24,31H,8-9,15H2,1-3H3,(H,28,29,30)	(S)-3-((1- cyclopropyl-1H- 1,2,3-triazol-4- yl)((4- (neopentylamino) quinazolin-6- yl)amino)methyl- d)benzonitrile::US10059695, I-7::US10577352, Compound I-7	2.6	aid1804197	Gilead Sciences, Inc.	136213681
511981	InChI=1S/C29H25FN8/c30-21-8-6-20(7-9-21)28(27-17-38(37-36-27)23-11-12-23)34-22-10-13-26-24(16-22)29(33-18-32-26)35-25(14-15-31)19-4-2-1-3-5-19/h1-10,13,16-18,23,25,28,34H,11-12,14H2,(H,32,33,35)	3-((6-(((S)-(1- cyclopropyl-1H- 1,2,3-triazol-4-yl)(4- fluorophenyl)methyl- d)amino)quinazolin- 4-yl)amino)-3- phenylpropanenitrile::US10059695, I-5::US10577352, Compound I-5	53	aid1795424	Gilead Sciences Inc	136213679
511979	InChI=1S/C29H28FN7/c1-2-25(19-6-4-3-5-7-19)34-29-24-16-22(12-15-26(24)31-18-32-29)33-28(20-8-10-21(30)11-9-20)27-17-37(36-35-27)23-13-14-23/h3-12,15-18,23,25,28,33H,2,13-14H2,1H3,(H,31,32,34)/t25-,28?/m1/s1	N6-((S)-(1- cyclopropyl-1H- 1,2,3-triazol-4-yl)(4- fluorophenyl)methyl- d)-N4-((R)-1- phenylpropyl) quinazoline- 4,6-diamine::US10059695, I-4::US10577352, Compound I-4	43	aid1795424	Gilead Sciences Inc	136213678
876713	InChI=1S/C27H30FN7O/c1-27(10-12-36-13-11-27)16-29-26-22-14-20(6-9-23(22)30-17-31-26)32-25(18-2-4-19(28)5-3-18)24-15-35(34-33-24)21-7-8-21/h2-6,9,14-15,17,21,25,32H,7-8,10-13,16H2,1H3,(H,29,30,31)	(S)-N6-((1- cyclopropyl-1H- 1,2,3-triazol-4-yl)(4- fluorophenyl)methyl- d)-N4-((4- methyltetrahydro- 2H-pyran-4- yl)methyl)quinazoline- 4,6-diamine::US10059695, I-3::US10577352, Compound I-3	11	aid1804197	Gilead Sciences, Inc.	136213677
511975	InChI=1S/C25H28FN7/c1-25(2,3)14-27-24-20-12-18(8-11-21(20)28-15-29-24)30-23(16-4-6-17(26)7-5-16)22-13-33(32-31-22)19-9-10-19/h4-8,11-13,15,19,23,30H,9-10,14H2,1-3H3,(H,27,28,29)/t23-/m0/s1	(S)-N6-((1- cyclopropyl-1H- 1,2,3-triazol-4-yl)(4- fluorophenyl)methyl)- N4- neopentylquinazoline- 4,6-diamine::US10059695, I-2::US10577352, Compound I-2	7.7	aid1795424	Gilead Sciences Inc	136213676
876709	InChI=1S/C25H28FN7/c1-25(2,3)14-27-24-20-12-18(8-11-21(20)28-15-29-24)30-23(16-4-6-17(26)7-5-16)22-13-33(32-31-22)19-9-10-19/h4-8,11-13,15,19,23,30H,9-10,14H2,1-3H3,(H,27,28,29)	(S)-N6-((1- cyclopropyl-1H- 1,2,3-triazol-4-yl)(4- fluorophenyl)methyl- d)-N4- neopentylquinazoline- 4,6-diamine::US10059695, I-1::US10577352, Compound I-1	5	aid1804197	Gilead Sciences, Inc.	136213675
1059414	InChI=1S/C29H30F3N9/c1-15-19(5-6-24(30)37-15)27(22-13-41(40-39-22)23-9-20(23)28(31)32)38-18-7-16(10-33)25-21(8-18)26(17(11-34)12-35-25)36-14-29(2,3)4/h5-8,12-13,20,23,27-28,38-40H,9,14H2,1-4H3,(H,35,36)/t20?,23-,27+/m1/s1	6-(((S)-(1-((1R,2R)-2- (difluoromethyl)cyclopropyl)- 1H-1,2,3-triazol-4-yl)(6-fluoro- 2-methylpyridin- 3-yl)methyl)amino)-4-::US11066414, Compound 834	5	aid1805683	Gilead Sciences, Inc.	134213290
1059542	InChI=1S/C28H32ClFN8O/c1-15-19(8-9-22(30)34-15)25(26-27(39-5)38(37-36-26)18-6-7-18)35-17-10-20-23(33-14-28(2,3)4)16(12-31)13-32-24(20)21(29)11-17/h8-11,13,18,25,35-37H,6-7,14H2,1-5H3,(H,32,33)/t25-/m0/s1	(S)-8-chloro-6-(((1-cyclopropyl-5- methoxy-1H-1,2,3-triazol-4-yl)(6-fluoro- 2-methylpyridin-3-yl)methyl)amino)- 4-(neopentylamino)quinoline-3- carbonitrile::US11066414, Compound 967	2	aid1805683	Gilead Sciences, Inc.	134212439
1059543	InChI=1S/C30H34ClFN8O/c1-16-20(6-7-23(32)36-16)26(27-28(41-5)40(39-38-27)30-10-17(11-30)12-30)37-19-8-21-24(35-15-29(2,3)4)18(13-33)14-34-25(21)22(31)9-19/h6-9,14,17,26,37-39H,10-12,15H2,1-5H3,(H,34,35)/t17?,26-,30?/m0/s1	(S)-6-(((1-(bicyclo[1.1.1]pentan-1-yl)-5- methoxy-1H-1,2,3-triazol-4-yl)(6-fluoro- 2-methylpyridin-3-yl)methyl)amino)-8- chloro-4-(neopentylamino)quinoline-3- carbonitrile::US11066414, Compound 968	2	aid1805683	Gilead Sciences, Inc.	134212437
1059531	InChI=1S/C29H28ClF5N8/c1-14-18(4-5-21(31)39-14)24(25-26(32)43(42-41-25)28-8-15(9-28)10-28)40-17-6-19-22(38-13-27(2,3)29(33,34)35)16(11-36)12-37-23(19)20(30)7-17/h4-7,12,15,24,40-42H,8-10,13H2,1-3H3,(H,37,38)/t15?,24-,28?/m0/s1	(S)-6-(((1-(bicyclo[1.1.1]pentan-1-yl)- 5-fluoro-1H-1,2,3-triazol-4-yl)(6- fluoro-2-methylpyridin-3- yl)methyl)amino)-8-chloro-4- ((3,3,3-trifluoro-2,2- dimethylpropyl)amino)quinoline- 3-carbonitrile::US11066414, Compound 956	7	aid1805683	Gilead Sciences, Inc.	134212435
1059521	InChI=1S/C30H34ClFN8/c1-16-21(9-10-24(32)36-16)27(28-29(17-5-6-17)40(39-38-28)20-7-8-20)37-19-11-22-25(35-15-30(2,3)4)18(13-33)14-34-26(22)23(31)12-19/h9-12,14,17,20,27,37-39H,5-8,15H2,1-4H3,(H,34,35)/t27-/m0/s1	(S)-8-chloro-6-(((1,5-dicyclopropyl- 1H-1,2,3-triazol-4-yl)(6-fluoro-2- methylpyridin-3-yl)methyl)amino)-4- (neopentylamino)quinoline-3- carbonitrile::US11066414, Compound 946	5	aid1805683	Gilead Sciences, Inc.	134212434
1059513	InChI=1S/C29H29ClF3N9/c1-27(2,3)16-37-24-18(12-34)13-36-26-20(24)10-19(11-21(26)30)38-25(17-4-5-23-35-8-9-41(23)14-17)22-15-42(40-39-22)28(6-7-28)29(31,32)33/h4-5,8-11,13-15,25,38-40H,6-7,16H2,1-3H3,(H,36,37)/t25-/m0/s1	(S)-8-chloro-6-((imidazo[1,2-a]pyridin-6- yl(1-(1-(trifluoromethyl)cyclopropyl)- 1H-1,2,3-triazol-4-yl)methyl)amino)- 4-(neopentylamino)quinoline-3-carbonitrile::US11066414, Compound 935	24	aid1805683	Gilead Sciences, Inc.	134212433
1059500	InChI=1S/C32H32ClFN8/c1-31(2,3)17-38-27-19(14-35)15-37-28-23(27)9-20(10-24(28)33)39-30(22-6-7-25(34)29-21(22)5-4-8-36-29)26-16-42(41-40-26)32-11-18(12-32)13-32/h4-10,15-16,18,30,39-41H,11-13,17H2,1-3H3,(H,37,38)/t18?,30-,32?/m0/s1	(S)-6-(((1-(bicyclo[1.1.1]pentan-1-yl)-1H- 1,2,3-triazol-4-yl)(8-fluoroquinolin-5- yl)methyl)amino)-8-chloro-4- (neopentylamino)quinoline-3-carbonitrile::US11066414, Compound 920	3	aid1805683	Gilead Sciences, Inc.	134212432
1059519	InChI=1S/C28H30ClF3N8O/c1-26(2,3)15-36-23-17(12-33)13-35-25-19(23)10-18(11-20(25)29)37-24(16-5-8-34-22(9-16)41-4)21-14-40(39-38-21)27(6-7-27)28(30,31)32/h5,8-11,13-14,24,37-39H,6-7,15H2,1-4H3,(H,35,36)/t24-/m0/s1	(S)-8-chloro-6-(((2-methoxypyridin-4-yl)(1- (1-(trifluoromethyl)cyclopropyl)-1H-1,2,3- triazol-4-yl)methyl)amino)-4- (neopentylamino)quinoline-3-carbonitrile::US11066414, Compound 941	64	aid1805683	Gilead Sciences, Inc.	134212430
1059491	InChI=1S/C33H35ClN8O/c1-32(2,3)18-38-28-20(15-35)16-37-29-25(28)10-21(11-26(29)34)39-30(27-17-42(41-40-27)33-12-19(13-33)14-33)23-6-5-7-24-22(23)8-9-36-31(24)43-4/h5-11,16-17,19,30,39-41H,12-14,18H2,1-4H3,(H,37,38)/t19?,30-,33?/m0/s1	(S)-6-(((1-(bicyclo[1.1.1]pentan-1-yl)-1H- 1,2,3-triazol-4-yl)(1-methoxylsoquinolin- 5-yl)methyl)amino)-8-chloro-4- (neopentylamino)quinoline-3-carbonitrile::US11066414, Compound 911	7	aid1805683	Gilead Sciences, Inc.	134212428
1059518	InChI=1S/C31H28ClF5N8/c1-29(2,31(35,36)37)16-41-25-17(13-38)14-40-26-21(25)11-18(12-22(26)32)42-27(20-5-3-7-23-19(20)6-4-10-39-23)24-15-45(44-43-24)30(8-9-30)28(33)34/h3-7,10-12,14-15,27-28,42-44H,8-9,16H2,1-2H3,(H,40,41)/t27-/m0/s1	(S)-8-chloro-6-(((1-(1- (difluoromethyl)cyclopropyl)-1H- 1,2,3-triazol-4-yl)(quinolin-5- yl)methyl)amino)-4-((3,3,3-trifluoro- 2,2-dimethylpropyl)amino)quinoline- 3-carbonitrile::US11066414, Compound 940	7	aid1805683	Gilead Sciences, Inc.	134212427
1059523	InChI=1S/C28H26ClF7N8/c1-13-16(4-5-19(30)40-13)22(23-24(31)44(43-42-23)27(6-7-27)25(32)33)41-15-8-17-20(39-12-26(2,3)28(34,35)36)14(10-37)11-38-21(17)18(29)9-15/h4-5,8-9,11,22,25,41-43H,6-7,12H2,1-3H3,(H,38,39)/t22-/m0/s1	(S)-8-chloro-6-(((1-(1- (difluoromethyl)cyclopropyl)-5- fluoro-1H-1,2,3-triazol-4-yl)(6- fluoro-2-methylpyridin-3- yl)methyl)amino)-4-((3,3,3-trifluoro- 2,2-dimethylpropyl)amino)- quinoline-3-carbonitrile::US11066414, Compound 948	5	aid1805683	Gilead Sciences, Inc.	134212426
1059511	InChI=1S/C31H33ClF2N8O/c1-31(2,3)17-38-27-18(14-35)15-37-28-24(27)10-19(11-25(28)32)39-29(26-16-42(41-40-26)20(12-33)13-34)22-6-5-7-23-21(22)8-9-36-30(23)43-4/h5-11,15-16,20,29,39-41H,12-13,17H2,1-4H3,(H,37,38)/t29-/m0/s1	(S)-8-chloro-6-(((1-(1,3-difluoropropan-2- yl)-1H-1,2,3-triazol-4-yl)(1- methoxylsoquinolin-5-yl)methyl)amino)-4- (neopentylamino)quinoline-3-carbonitrile::US11066414, Compound 933	29	aid1805683	Gilead Sciences, Inc.	134212424
1059478	InChI=1S/C32H33F2N9/c1-31(2,3)18-39-28-20(15-36)16-38-27-19(14-35)12-21(13-24(27)28)40-29(23-8-6-10-25-22(23)9-7-11-37-25)26-17-43(42-41-26)32(4,5)30(33)34/h6-13,16-17,29-30,40-42H,18H2,1-5H3,(H,38,39)/t29-/m0/s1	(S)-6-(((1-(1,1-difluoro-2-methylpropan- 2-yl)-1H-1,2,3-triazol-4-yl)(quinolin-5- yl)methyl)amino)-4- (neopentylamino)quinoline-3,8-dicarbonitrile::US11066414, Compound 898	5	aid1805683	Gilead Sciences, Inc.	134212420
1059474	InChI=1S/C32H28F5N9/c1-30(2,32(35,36)37)17-42-27-19(14-39)15-41-26-18(13-38)11-20(12-23(26)27)43-28(22-5-3-7-24-21(22)6-4-10-40-24)25-16-46(45-44-25)31(8-9-31)29(33)34/h3-7,10-12,15-16,28-29,43-45H,8-9,17H2,1-2H3,(H,41,42)/t28-/m0/s1	(S)-6-((((1-(1- (difluoromethyl)cyclopropyl)- 1H-1,2,3-triazol-4-yl)(quinolin-5- yl)methyl)amino)-4-((3,3,3-trifluoro- 2,2-dimethylpropyl)amino)quinoline-3,8- dicarbonitrile::US11066414, Compound 894	3	aid1805683	Gilead Sciences, Inc.	134212419
1059472	InChI=1S/C31H32FN9/c1-19(13-32)41-17-27(39-40-41)30(24-7-5-9-26-23(24)8-6-10-35-26)38-22-11-20(14-33)28-25(12-22)29(21(15-34)16-36-28)37-18-31(2,3)4/h5-12,16-17,19,30,38-40H,13,18H2,1-4H3,(H,36,37)/t19-,30-/m0/s1	6-(((S)-(1-((S)-1-fluoropropan-2-yl)-1H- 1,2,3-triazol-4-yl)(quinolin-5- yl)methyl)amino)-4- (neopentylamino)quinoline-3,8-dicarbonitrile::US11066414, Compound 892	2	aid1805683	Gilead Sciences, Inc.	134212418
1059452	InChI=1S/C30H32FN9/c1-17-21(5-6-25(31)36-17)28(23-15-40(39-38-23)24-11-30(24)7-8-30)37-20-9-18(12-32)26-22(10-20)27(19(13-33)14-34-26)35-16-29(2,3)4/h5-6,9-10,14-15,24,28,37-39H,7-8,11,16H2,1-4H3,(H,34,35)/t24?,28-/m0/s1	6-(((1S)-(6-fluoro-2-methylpyridin-3-yl)(1- (spiro[2.2]pentan-1-yl)-1H-1,2,3-triazol-4- yl)methyl)amino)-4- (neopentylamino)quinoline- 3,8-dicarbonitrile::US11066414, Compound 872	1	aid1805683	Gilead Sciences, Inc.	134212415
1059461	InChI=1S/C35H37N9O/c1-34(2,3)20-39-31-22(17-37)18-38-30-21(16-36)14-24(15-28(30)31)40-32(26-6-5-7-27-25(26)10-13-43(4)33(27)45)29-19-44(42-41-29)35(11-12-35)23-8-9-23/h5-7,10,13-15,18-19,23,32,40-42H,8-9,11-12,20H2,1-4H3,(H,38,39)/t32-/m0/s1	(S)-6-(((4-(1-(1-bi(cyclopropan)]- 1-yl)-1H-1,2,3- triazol-4-yl)(2-methyl-1-oxo-1,2- dihydroisoquinolin-5-yl)methyl)amino)-4- (neopentylamino)quinoline-3,8-dicarbonitrile::US11066414, Compound 881	2	aid1805683	Gilead Sciences, Inc.	134212414
1059451	InChI=1S/C33H33F2N9O/c1-32(2,3)18-39-28-20(15-37)16-38-27-19(14-36)12-21(13-25(27)28)40-29(26-17-44(42-41-26)33(9-10-33)31(34)35)23-6-5-7-24-22(23)8-11-43(4)30(24)45/h5-8,11-13,16-17,29,31,40-42H,9-10,18H2,1-4H3,(H,38,39)/t29-/m0/s1	(S)-6-(( (Ml-(difluoromethyl)cyclopropyl)- 1H-1,2,3-triazol- 4-yl)(2-methyl-1-oxo-1,2- dihydroisoquinolin-5- yl)methyl)amino)-4- (neopentylamino)quinoline- 3,8-dicarbonitrile::US11066414, Compound 871	1	aid1805683	Gilead Sciences, Inc.	134212413
1059453	InChI=1S/C31H32F2N10/c1-30(2,3)17-38-26-19(14-35)15-37-25-18(13-34)11-20(12-23(25)26)39-27(21-5-9-36-28-22(21)6-10-42(28)4)24-16-43(41-40-24)31(7-8-31)29(32)33/h5-6,9-12,15-16,27,29,39-41H,7-8,17H2,1-4H3,(H,37,38)/t27-/m0/s1	(S)-6-(((1-(1- (difluoromethyl)cyclopropyl)-1H- 1,2,3-triazol-4-yl)(1-methyl- 1H-pyrrolo[2,3- b]pyridin-4-yl)methyl)amino)-4- (neopentylamino)quinoline-3,8- dicarbonitrile::US11066414, Compound 873	5	aid1805683	Gilead Sciences, Inc.	134212411
1059444	InChI=1S/C28H26F5N9/c1-14-19(6-7-21(29)38-14)24(25-26(30)42(41-40-25)18-4-5-18)39-17-8-15(10-34)22-20(9-17)23(16(11-35)12-36-22)37-13-27(2,3)28(31,32)33/h6-9,12,18,24,39-41H,4-5,13H2,1-3H3,(H,36,37)/t24-/m0/s1	(S)-6-(((1-cyclopropyl-5- fluoro-1H-1,2,3-triazol- 4-yl)(6-fluoro-2-methylpyridin- 3-yl)methyl)amino)- 4-((3,3,3-trifluoro-2,2- dimethylpropyl)amino)quinoline- 3,8-dicarbonitrile::US11066414, Compound 864	2	aid1805683	Gilead Sciences, Inc.	134212407
1059439	InChI=1S/C29H32FN9O/c1-16-21(8-9-23(30)35-16)26(27-28(40-5)39(38-37-27)20-6-7-20)36-19-10-17(12-31)24-22(11-19)25(18(13-32)14-33-24)34-15-29(2,3)4/h8-11,14,20,26,36-38H,6-7,15H2,1-5H3,(H,33,34)/t26-/m0/s1	(S)-6-(((1-cyclopropyl-5-methoxy-1H-1,2,3- triazol-4-yl)(6-fluoro-2-methylpyridin-3- yl)methyl)amino)-4- (neopentylamino)quinoline- 3,8-dicarbonitrile::US11066414, Compound 859	2	aid1805683	Gilead Sciences, Inc.	134212406
1059436	InChI=1S/C29H29N9S/c1-29(2,3)16-34-27-18(11-31)12-33-26-17(10-30)8-19(9-22(26)27)35-28(24-14-38(37-36-24)20-4-5-20)23-15-39-25-13-32-7-6-21(23)25/h6-9,12-15,20,28,35-37H,4-5,16H2,1-3H3,(H,33,34)/t28-/m0/s1	(S)-6-(((1-cyclopropyl-1H-1,2,3-triazol-4- yl)(thieno[2,3-c]pyridin-3- yl)methyl)amino)-4- (neopentylamino)quinoline- 3,8-dicarbonitrile::US11066414, Compound 856	1	aid1805683	Gilead Sciences, Inc.	134212405
1059437	InChI=1S/C31H34FN9/c1-17-23(9-10-25(32)37-17)28(29-30(18-5-6-18)41(40-39-29)22-7-8-22)38-21-11-19(13-33)26-24(12-21)27(20(14-34)15-35-26)36-16-31(2,3)4/h9-12,15,18,22,28,38-40H,5-8,16H2,1-4H3,(H,35,36)/t28-/m0/s1	(S)-6-(((l,5-dicyclopropyl-1H-1,2,3-triazol-4- yl)(6-fluoro-2-methylpyridin- 3-yl)methyl)amino)- 4-(neopentylamino)quinoline- 3,8-dicarbonitrile::US11066414, Compound 857	4	aid1805683	Gilead Sciences, Inc.	134212404
1059433	InChI=1S/C33H35N9O2/c1-32(2,3)17-37-29-21(14-35)15-36-28-20(13-34)11-22(12-26(28)29)38-30(27-16-42(40-39-27)33(4)18-44-19-33)24-7-6-8-25-23(24)9-10-41(5)31(25)43/h6-12,15-16,30,38-40H,17-19H2,1-5H3,(H,36,37)/t30-/m0/s1	(S)-6-(((2-methyl-1-oxo-1,2- dihydroisoquinolin-5- yl)(1-(3-methyloxetan-3-yl)- 1H-1,2,3-triazol-4- yl)methyl)amino)-4- (neopentylamino)quinoline- 3,8-dicarbonitrile::US11066414, Compound 853	1	aid1805683	Gilead Sciences, Inc.	134212403
1059432	InChI=1S/C29H32FN9O/c1-17-21(6-7-24(30)35-17)27(23-13-39(38-37-23)29(5)15-40-16-29)36-20-8-18(10-31)25-22(9-20)26(19(11-32)12-33-25)34-14-28(2,3)4/h6-9,12-13,27,36-38H,14-16H2,1-5H3,(H,33,34)/t27-/m0/s1	(S)-6-(((6-fluoro-2-methylpyridin-3-yl)(1-(3- methyloxetan-3-yl)-1H-1,2,3-triazol-4- yl)methyl)amino)-4- (neopentylamino)quinoline- 3,8-dicarbonitrile::US11066414, Compound 852	2	aid1805683	Gilead Sciences, Inc.	134212402
1059429	InChI=1S/C30H28F3N9/c1-16-21(2-3-24(31)38-16)27(23-14-42(41-40-23)30(4-5-30)28(32)33)39-20-6-18(11-34)25-22(7-20)26(19(12-35)13-36-25)37-15-29-8-17(9-29)10-29/h2-3,6-7,13-14,17,27-28,39-41H,4-5,8-10,15H2,1H3,(H,36,37)/t17?,27-,29?/m0/s1	(S)-4-((bicyclo[1.1.1]pentan-1- ylmethyl)amino)-6- (((1-(1-(difluoromethyl)- cyclopropyl)-1H-1,2,3- triazol-4-yl)(6-fluoro-2-methylpyridin-3- yl)methyl)amino)quinoline- 3,8-dicarbonitrile::US11066414, Compound 849	16	aid1805683	Gilead Sciences, Inc.	134212401
1059428	InChI=1S/C30H27F4N9/c1-16-21(2-3-24(31)39-16)27(23-14-43(42-41-23)29(4-5-29)30(32,33)34)40-20-6-18(11-35)25-22(7-20)26(19(12-36)13-37-25)38-15-28-8-17(9-28)10-28/h2-3,6-7,13-14,17,27,40-42H,4-5,8-10,15H2,1H3,(H,37,38)/t17?,27-,28?/m0/s1	(S)-4-((bicyclo[1.1.1]pentan-1- ylmethyl)amino)- 6-(((6-fluoro-2-methylpyridin- 3-yl)(1-(1- (trifluoromethyl)cyclopropyl)- 1H-1,2,3-triazol- 4-yl)methyl)amino)quinoline- 3,8-dicarbonitrile::US11066414, Compound 848	31	aid1805683	Gilead Sciences, Inc.	134212400
1059427	InChI=1S/C32H33F2N9/c1-31(2,3)18-38-28-20(15-36)16-37-27-19(14-35)12-21(13-24(27)28)39-29(23-6-5-7-26-22(23)8-11-42(26)4)25-17-43(41-40-25)32(9-10-32)30(33)34/h5-8,11-13,16-17,29-30,39-41H,9-10,18H2,1-4H3,(H,37,38)/t29-/m0/s1	(S)-6-(((1-(1-(difluoromethyl)- cyclopropyl)-1H- 1,2,3-triazol-4-yl)(1-methyl-1H-indol-4- yl)methyl)amino)-4- (neopentylamino)quinoline- 3,8-dicarbonitrile::US11066414, Compound 847	31	aid1805683	Gilead Sciences, Inc.	134212399
1059426	InChI=1S/C29H29F4N9/c1-16-20(5-6-23(30)38-16)26(22-14-42(41-40-22)28(4)7-8-28)39-19-9-17(11-34)24-21(10-19)25(18(12-35)13-36-24)37-15-27(2,3)29(31,32)33/h5-6,9-10,13-14,26,39-41H,7-8,15H2,1-4H3,(H,36,37)/t26-/m0/s1	(S)-6-(((6-fluoro-2- methylpyridin-3-yl)(1-(1- methylcyclopropyl)-1H-1,2,3-triazol-4- yl)methyl)amino)-4-((3,3,3-trifluoro-2,2- dimethylpropyl)amino)quinoline-3,8- dicarbonitrile::US11066414, Compound 846	2	aid1805683	Gilead Sciences, Inc.	134212398
1059425	InChI=1S/C32H34F3N9/c1-17-21(6-7-25(33)40-17)28(23-16-44(43-42-23)32(8-9-32)29(34)35)41-20-10-18(12-36)26-22(11-20)27(19(13-37)14-38-26)39-15-24-30(2,3)31(24,4)5/h6-7,10-11,14,16,24,28-29,41-43H,8-9,15H2,1-5H3,(H,38,39)/t28-/m0/s1	(S)-6-(((1-(1-(difluoromethyl)- cyclopropyl)-1H- 1,2,3-triazol-4-yl)(6-fluoro-2- methylpyridin-3- yl)methyl)amino)-4-(((2,2,3,3- tetramethylcyclopropyl)methyl)- amino)quinoline-3,8-dicarbonitrile::US11066414, Compound 845	20	aid1805683	Gilead Sciences, Inc.	134212397
1059415	InChI=1S/C33H30F3N9/c1-3-26(20-7-5-4-6-8-20)42-30-22(16-38)17-39-29-21(15-37)13-23(14-25(29)30)41-31(24-9-10-28(34)40-19(24)2)27-18-45(44-43-27)33(11-12-33)32(35)36/h4-10,13-14,17-18,26,31-32,41,43-44H,3,11-12H2,1-2H3,(H,39,42)/t26-,31+/m1/s1	6-(((S)-(1-(1- (difluoromethyl)cyclopropyl)-1H- 1,2,3-triazol-4-yl)(6-fluoro- 2-methylpyridin-3- yl)methyl)amino)-4-(((R)- 1-phenylpropyl)- amino)quinoline-3,8-dicarbonitrile::US11066414, Compound 835	4	aid1805683	Gilead Sciences, Inc.	134212395
1059411	InChI=1S/C30H27F6N9/c1-16-20(3-4-23(31)41-16)26(22-14-45(44-43-22)29(7-8-29)27(32)33)42-19-9-17(11-37)24-21(10-19)25(18(12-38)13-39-24)40-15-28(5-2-6-28)30(34,35)36/h3-4,9-10,13-14,26-27,42-44H,2,5-8,15H2,1H3,(H,39,40)/t26-/m0/s1	(S)-6-(((1-(1-(difluoromethyl)- cyclopropyl)-1H- 1,2,3-triazol-4-yl)(6-fluoro-2- methylpyridin-3- yl)methyl)amino)-4-(((1- (trifluoromethyl)cyclobutyl)methyl)- amino)quinoline-3,8-dicarbonitrile::US11066414, Compound 831	8	aid1805683	Gilead Sciences, Inc.	134212393
1059410	InChI=1S/C30H29F3N10/c1-17-22(6-5-20(13-36)39-17)27(24-15-43(42-41-24)29(7-8-29)30(31,32)33)40-21-9-18(11-34)25-23(10-21)26(19(12-35)14-37-25)38-16-28(2,3)4/h5-6,9-10,14-15,27,40-42H,7-8,16H2,1-4H3,(H,37,38)/t27-/m0/s1	(S)-6-(((6-cyano-2-methylpyridin- 3-yl)(1-(1- (trifluoromethyl)cyclopropyl)-1H- 1,2,3-triazol- 4-yl)methyl)amino)-4- (neopentylamino)quinoline- 3,8-dicarbonitrile::US11066414, Compound 830	16	aid1805683	Gilead Sciences, Inc.	134212392
1059407	InChI=1S/C29H31F4N9/c1-16-20(7-8-23(30)38-16)26(22-14-42(41-40-22)27(2,3)4)39-19-9-17(11-34)24-21(10-19)25(18(12-35)13-36-24)37-15-28(5,6)29(31,32)33/h7-10,13-14,26,39-41H,15H2,1-6H3,(H,36,37)/t26-/m0/s1	(S)-6-(((1-(tert-butyl)-1H- 1,2,3-triazol-4-yl)(6- fluoro-2-methylpyridin-3- yl)methyl)amino)-4- ((3,3,3-trifluoro-2,2- dimethylpropyl)amino)quinoline- 3,8-dicarbonitrile::US11066414, Compound 827	2	aid1805683	Gilead Sciences, Inc.	134212391
1059408	InChI=1S/C29H30F3N9/c1-17-5-6-18(13-35-17)26(23-15-41(40-39-23)28(7-8-28)29(30,31)32)38-21-9-19(11-33)24-22(10-21)25(20(12-34)14-36-24)37-16-27(2,3)4/h5-6,9-10,13-15,26,38-40H,7-8,16H2,1-4H3,(H,36,37)/t26-/m0/s1	(S)-6-(((6-methylpyridin-3-yl)(1-(1- (trifluoromethyl)cyclopropyl)- 1H-1,2,3-triazol- 4-yl)methyl)amino)-4- (neopentylamino)quinoline- 3,8-dicarbonitrile::US11066414, Compound 828	22	aid1805683	Gilead Sciences, Inc.	134212390
1059406	InChI=1S/C29H27F3N10/c1-27(2,3)16-38-25-19(11-34)14-37-24-18(10-33)8-21(9-22(24)25)39-26(17-4-5-20(12-35)36-13-17)23-15-42(41-40-23)28(6-7-28)29(30,31)32/h4-5,8-9,13-15,26,39-41H,6-7,16H2,1-3H3,(H,37,38)/t26-/m0/s1	(S)-6-(((6-cyanopyridin-3-yl)(1-(1- (trifluoromethyl)cyclopropyl)- 1H-1,2,3-triazol- 4-yl)methyl)amino)-4- (neopentylamino)quinoline- 3,8-dicarbonitrile::US11066414, Compound 826	51	aid1805683	Gilead Sciences, Inc.	134212389
1059400	InChI=1S/C34H32F3N9O/c1-32(2,34(35,36)37)18-42-29-21(15-39)16-41-28-20(14-38)9-22(10-26(28)29)43-30(27-17-46(45-44-27)33-11-19(12-33)13-33)24-5-4-6-25-23(24)7-8-40-31(25)47-3/h4-10,16-17,19,30,43-45H,11-13,18H2,1-3H3,(H,41,42)/t19?,30-,33?/m0/s1	(S)-6-(((1-(bicyclo[1.1.1]pentan- 1-yl)-1H-1,2,3- triazol-4-yl)(1-methoxylsoquinolin-5- yl)methyl)amino)-4-((3,3,3-trifluoro-2,2- dimethylpropyl)amino)quinoline-3,8- dicarbonitrile::US11066414, Compound 820	3	aid1805683	Gilead Sciences, Inc.	134212388
1059397	InChI=1S/C33H29F3N10/c1-31(2,3)18-42-29-20(14-38)16-41-28-19(13-37)11-21(12-25(28)29)43-30(24-6-4-5-23-22(24)7-10-40-26(23)15-39)27-17-46(45-44-27)32(8-9-32)33(34,35)36/h4-7,10-12,16-17,30,43-45H,8-9,18H2,1-3H3,(H,41,42)/t30-/m0/s1	(S)-6-(((1-cyanoisoquinolin- 5-yl)(1-(1- (trifluoromethyl)cyclopropyl)- 1H-1,2,3-triazol- 4-yl)methyl)amino)-4- (neopentylamino)quinoline- 3,8-dicarbonitrile::US11066414, Compound 817	10	aid1805683	Gilead Sciences, Inc.	134212387
1059392	InChI=1S/C33H32F3N9O/c1-31(2,3)18-41-28-20(15-38)16-40-27-19(14-37)12-21(13-25(27)28)42-29(23-6-5-7-24-22(23)8-11-39-30(24)46-4)26-17-45(44-43-26)32(9-10-32)33(34,35)36/h5-8,11-13,16-17,29,42-44H,9-10,18H2,1-4H3,(H,40,41)/t29-/m0/s1	(S)-6-(((1-methoxylsoquinolin- 5-yl)(1-(1- (trifluoromethyl)cyclopropyl)- 1H-1,2,3-triazol- 4-yl)methyl)amino)-4- (neopentylamino)quinoline- 3,8-dicarbonitrile::US11066414, Compound 812	5	aid1805683	Gilead Sciences, Inc.	134212386
1059389	InChI=1S/C33H35N9O/c1-32(2,3)19-38-29-21(16-35)17-37-28-20(15-34)13-22(14-26(28)29)39-30(27-18-42(41-40-27)33(4)10-11-33)24-7-6-8-25-23(24)9-12-36-31(25)43-5/h6-9,12-14,17-18,30,39-41H,10-11,19H2,1-5H3,(H,37,38)/t30-/m0/s1	(S)-6-(((1-methoxylsoquinolin- 5-yl)(1-(1- methylcyclopropyl)-1H- 1,2,3-triazol-4- yl)methyl)amino)-4- (neopentylamino)quinoline-3,8- dicarbonitrile::US11066414, Compound 809	3	aid1805683	Gilead Sciences, Inc.	134212385
1059391	InChI=1S/C33H32F3N9O/c1-31(2,3)18-40-29-20(15-38)16-39-28-19(14-37)12-21(13-24(28)29)41-30(23-6-5-7-25-22(23)8-9-27(42-25)46-4)26-17-45(44-43-26)32(10-11-32)33(34,35)36/h5-9,12-13,16-17,30,41,43-44H,10-11,18H2,1-4H3,(H,39,40)/t30-/m0/s1	(S)-6-(((2-methoxyquinolin- 5-yl)(1-(1- (trifluoromethyl)cyclopropyl)- 1H-1,2,3-triazol- 4-yl)methyl)amino)-4- (neopentylamino)quinoline- 3,8-dicarbonitrile::US11066414, Compound 811	11	aid1805683	Gilead Sciences, Inc.	134212384
1059388	InChI=1S/C32H33N9O/c1-32(2,3)18-37-29-20(15-34)16-36-28-19(14-33)12-21(13-26(28)29)38-30(27-17-41(40-39-27)22-8-9-22)24-6-5-7-25-23(24)10-11-35-31(25)42-4/h5-7,10-13,16-17,22,30,38-40H,8-9,18H2,1-4H3,(H,36,37)/t30-/m0/s1	(S)-6-(((1-cyclopropyl-1H- 1,2,3-triazol-4-yl)(1- methoxylsoquinolin-5- yl)methyl)airiino)-4- (neopentylamino)quinoline- 3,8-dicarbonitrile::US11066414, Compound 808	3	aid1805683	Gilead Sciences, Inc.	134212383
1059390	InChI=1S/C33H33F2N9O/c1-32(2,3)18-40-28-20(15-37)16-39-27-19(14-36)12-21(13-25(27)28)41-29(26-17-44(43-42-26)33(9-10-33)31(34)35)23-6-5-7-24-22(23)8-11-38-30(24)45-4/h5-8,11-13,16-17,29,31,41-43H,9-10,18H2,1-4H3,(H,39,40)/t29-/m0/s1	(S)-6-(((1-(1-(difluoromethyl)- cyclopropyl)-1H- 1,2,3-triazol-4-yl)(1- methoxylsoquinolin-5- yl)methyl)amino)-4- (neopentylamino)quinoline- 3,8-dicarbonitrile::US11066414, Compound 810	4	aid1805683	Gilead Sciences, Inc.	134212382
1059386	InChI=1S/C30H32ClFN10O/c1-16-20(6-7-24(32)36-16)27(23-14-42(41-39-23)30(8-9-30)28-40-38-17(2)43-28)37-19-10-21-25(35-15-29(3,4)5)18(12-33)13-34-26(21)22(31)11-19/h6-7,10-11,13-14,27,37,39,41H,8-9,15H2,1-5H3,(H,34,35)/t27-/m0/s1	(S)-8-chloro-6-(((6-fluoro-2- methylpyridin-3- yl)(1-(1-(5-methyl-1,3,4-oxadiazol-2- yl)cyclopropyl)-1H-1,2,3-triazol-4- yl)methyl)amino)-4- (neopentylamino)quinoline- 3-carbonitrile::US11066414, Compound 806	3	aid1805683	Gilead Sciences, Inc.	134212381
1059385	InChI=1S/C28H30ClF3N8O/c1-26(2,3)15-36-23-17(11-33)13-35-25-19(23)9-18(10-20(25)29)37-24(16-5-6-22(41-4)34-12-16)21-14-40(39-38-21)27(7-8-27)28(30,31)32/h5-6,9-10,12-14,24,37-39H,7-8,15H2,1-4H3,(H,35,36)/t24-/m0/s1	(S)-8-chloro-6-(((6- methoxypyridin-3-yl)(1-(1- (trifluoromethyl)cyclopropyl)- 1H-1,2,3-triazol- 4-yl)methyl)amino)-4- (neopentylamino)quinoline- 3-carbonitrile::US11066414, Compound 805	28	aid1805683	Gilead Sciences, Inc.	134212380
1059384	InChI=1S/C30H31ClF2N8/c1-30(2,3)17-37-27-18(14-34)15-36-28-23(27)10-19(11-24(28)31)38-29(26-16-41(40-39-26)20(12-32)13-33)22-6-4-8-25-21(22)7-5-9-35-25/h4-11,15-16,20,29,38-40H,12-13,17H2,1-3H3,(H,36,37)/t29-/m0/s1	(S)-8-chloro-6-(((1-(1,3- difluoropropan-2-yl)-1H- 1,2,3-triazol-4-yl)(quinolin- 5-yl)methyl)amino)- 4-(neopentylamino)quinoline- 3-carbonitrile::US11066414, Compound 804	9	aid1805683	Gilead Sciences, Inc.	134212379
1059380	InChI=1S/C33H37ClN8O/c1-32(2,3)19-37-28-20(16-35)17-36-29-25(28)14-21(15-26(29)34)38-30(27-18-42(40-39-27)33(4)11-7-12-33)23-8-6-9-24-22(23)10-13-41(5)31(24)43/h6,8-10,13-15,17-18,30,38-40H,7,11-12,19H2,1-5H3,(H,36,37)/t30-/m0/s1	(S)-8-chloro-6-(((2-methyl-1- oxo-1,2-dihydroiso- quinolin-5-yl)(1-(1- methylcyclobutyl)-1H-1,2,3- triazol-4-yl)methyl)amino)-4- (neopentylamino)quinoline-3- carbonitrile::US11066414, Compound 800	2	aid1805683	Gilead Sciences, Inc.	134212378
1059382	InChI=1S/C32H37ClN8O2/c1-19(17-43-6)41-16-27(38-39-41)30(23-8-7-9-24-22(23)10-11-40(5)31(24)42)37-21-12-25-28(36-18-32(2,3)4)20(14-34)15-35-29(25)26(33)13-21/h7-13,15-16,19,30,37-39H,17-18H2,1-6H3,(H,35,36)/t19?,30-/m0/s1	8-chloro-6-(((S)-(1-((S)-1- methoxypropan-2-yl)- 1H-1,2,3-triazol-4-yl)(2- methyl-1-oxo-1,2- dihydroisoquinolin-5- yl)methyl)amino)-4- (neopentylamino)quinoline- 3-carbonitrile::US11066414, Compound 802	4	aid1805683	Gilead Sciences, Inc.	134212377
1059377	InChI=1S/C31H30ClF3N8/c1-29(2,31(33,34)35)17-39-26-18(14-36)15-38-27-22(26)12-19(13-23(27)32)40-28(25-16-43(42-41-25)30(3)9-10-30)21-6-4-8-24-20(21)7-5-11-37-24/h4-8,11-13,15-16,28,40-42H,9-10,17H2,1-3H3,(H,38,39)/t28-/m0/s1	(S)-8-chloro-6-(((1-(1- methylcyclopropyl)-1H- 1,2,3-triazol-4-yl)(quinolin-5- yl)methyl)amino)-4- ((3,3,3-trifluoro-2,2- dimethylpropyl)amino)quinoline- 3-carbonitrile::US11066414, Compound 797	3	aid1805683	Gilead Sciences, Inc.	134212376
1059381	InChI=1S/C32H37ClN8O/c1-7-19(2)41-17-27(38-39-41)30(23-9-8-10-24-22(23)11-12-40(6)31(24)42)37-21-13-25-28(36-18-32(3,4)5)20(15-34)16-35-29(25)26(33)14-21/h8-14,16-17,19,30,37-39H,7,18H2,1-6H3,(H,35,36)/t19?,30-/m0/s1	6-(((1 S)-(1-(sec-butyl)-1H- 1,2,3-triazol-4-yl)(2- methyl-1-oxo-1,2-dihydroisoquinolin-5- yl)methyl)amino)-8-chloro-4- (neopentylamino)quinoline-3- carbonitrile::US11066414, Compound 801	3	aid1805683	Gilead Sciences, Inc.	134212375
1059376	InChI=1S/C32H35ClN8O/c1-32(2,3)18-36-28-19(15-34)16-35-29-25(28)13-20(14-26(29)33)37-30(27-17-41(39-38-27)21-7-5-8-21)23-9-6-10-24-22(23)11-12-40(4)31(24)42/h6,9-14,16-17,21,30,37-39H,5,7-8,18H2,1-4H3,(H,35,36)/t30-/m0/s1	(S)-8-chloro-6-(((1-cyclobutyl- 1H-1,2,3-triazol-4- yl)(2-methyl-1-oxo-1,2- dihydroisoquinolin-5- yl)methyl)amino)-4- (neopentylamino)quinoline- 3-carbonitrile::US11066414, Compound 796	2	aid1805683	Gilead Sciences, Inc.	134212374
1059379	InChI=1S/C32H30ClF3N8/c1-30(2,32(34,35)36)17-40-27-19(14-37)15-39-28-23(27)9-20(10-24(28)33)41-29(22-5-3-7-25-21(22)6-4-8-38-25)26-16-44(43-42-26)31-11-18(12-31)13-31/h3-10,15-16,18,29,41-43H,11-13,17H2,1-2H3,(H,39,40)/t18?,29-,31?/m0/s1	(S)-6-(((1-(bicyclo[1.1.1]pentan- 1-yl)-1H-1,2,3- triazol-4-yl)(quinolin-5- yl)methyl)amino)-8- chloro-4-((3,3,3-trifluoro-2,2- dimethylpropyl)amino)quinoline- 3-carbonitrile::US11066414, Compound 799	4	aid1805683	Gilead Sciences, Inc.	134212373
1059378	InChI=1S/C33H32ClF3N8/c1-31(2,33(35,36)37)18-41-28-19(15-38)16-40-29-24(28)13-21(14-25(29)34)42-30(23-5-3-7-26-22(23)6-4-12-39-26)27-17-45(44-43-27)32(10-11-32)20-8-9-20/h3-7,12-14,16-17,20,30,42-44H,8-11,18H2,1-2H3,(H,40,41)/t30-/m0/s1	(S)-6-(((1-([1,1'-bi(cyclopropan)]- 1-yl)-1H-1,2,3- triazol-4-yl)(quinolin-5- yl)methyl)amino)-8-chloro- 4-((3,3,3-trifluoro-2,2- dimethylpropyl)amino)quinoline- 3-carbonitrile::US11066414, Compound 798	7	aid1805683	Gilead Sciences, Inc.	134212372
1059375	InChI=1S/C28H30ClF3N8/c1-16-5-6-17(12-34-16)24(22-14-40(39-38-22)27(7-8-27)28(30,31)32)37-19-9-20-23(36-15-26(2,3)4)18(11-33)13-35-25(20)21(29)10-19/h5-6,9-10,12-14,24,37-39H,7-8,15H2,1-4H3,(H,35,36)/t24-/m0/s1	(S)-8-chloro-6-(((6- methylpyridin-3-yl)(1-(1- (trifluoromethyl)cyclopropyl)- 1H-1,2,3-triazol- 4-yl)methyl)amino)-4- (neopentylamino)quinoline-3- carbonitrile::US11066414, Compound 795	34	aid1805683	Gilead Sciences, Inc.	134212371
1059366	InChI=1S/C33H35ClN8O/c1-32(2,3)18-37-29-20(15-35)16-36-30-24(29)10-21(11-25(30)34)38-31(26-17-42(40-39-26)33-12-19(13-33)14-33)23-6-5-7-27-22(23)8-9-28(43)41(27)4/h5-11,16-17,19,31,38-40H,12-14,18H2,1-4H3,(H,36,37)/t19?,31-,33?/m0/s1	(S)-6-(((1-(bicyclo[1.1.1]pentan- 1-yl)-1H-1,2,3-triazol- 4-yl)(1-methyl-2-oxo-1,2- dihydroquinolin-5- yl)methyl)amino)-8-chloro-4- (neopentylamino)quinoline-3- carbonitrile::US11066414, Compound 786	5	aid1805683	Gilead Sciences, Inc.	134212368
1059365	InChI=1S/C33H32ClF3N8O/c1-31(2,33(35,36)37)17-40-27-19(14-38)15-39-28-24(27)9-20(10-25(28)34)41-29(26-16-45(43-42-26)32-11-18(12-32)13-32)22-5-4-6-23-21(22)7-8-44(3)30(23)46/h4-10,15-16,18,29,41-43H,11-13,17H2,1-3H3,(H,39,40)/t18?,29-,32?/m0/s1	(S)-6-(((1-(bicyclo[1.1.1]pentan- 1-yl)-1H-1,2,3- triazol-4-yl)(2-methyl-1-oxo- 1,2-dihydroisoquinolin- 5-yl)methyl)amino)-8-chloro- 4-((3,3,3-trifluoro-2,2- dimethylpropyl)amino)quinoline- 3-carbonitrile::US11066414, Compound 785	2	aid1805683	Gilead Sciences, Inc.	134212367
1059364	InChI=1S/C31H31ClF4N8O/c1-17(12-33)44-15-25(41-42-44)28(21-6-5-7-22-20(21)8-9-43(4)29(22)45)40-19-10-23-26(39-16-30(2,3)31(34,35)36)18(13-37)14-38-27(23)24(32)11-19/h5-11,14-15,17,28,40-42H,12,16H2,1-4H3,(H,38,39)/t17-,28-/m0/s1	8-chloro-6-(((S)-(1-((S)-1- fluoropropan-2-yl)-1H- 1,2,3-triazol-4-yl)(2-methyl-1- oxo-1,2-dihydroiso- quinolin-5-yl)methyl)amino)-4- ((3,3,3-trifluoro-2,2- dimethylpropyl)amino)quinoline- 3-carbonitrile::US11066414, Compound 784	3	aid1805683	Gilead Sciences, Inc.	134212366
1059359	InChI=1S/C34H37ClN8O/c1-33(2,3)19-38-29-20(16-36)17-37-30-26(29)14-22(15-27(30)35)39-31(24-6-5-7-25-23(24)10-13-42(4)32(25)44)28-18-43(41-40-28)34(11-12-34)21-8-9-21/h5-7,10,13-15,17-18,21,31,39-41H,8-9,11-12,19H2,1-4H3,(H,37,38)/t31-/m0/s1	(S)-6-(((1-([1,1'- bi(cyclopropan)]-1-yl)-1H- 1,2,3-triazol-4-yl)(2-methyl-1-oxo-1,2- dihydroisoquinolin-5- yl)methyl)amino)-8-chloro- 4-(neopentylamino)quinoline-3-carbonitrile::US11066414, Compound 779	3	aid1805683	Gilead Sciences, Inc.	134212365
1059363	InChI=1S/C34H34ClF3N8O/c1-32(2,34(36,37)38)18-41-28-19(15-39)16-40-29-25(28)13-21(14-26(29)35)42-30(23-5-4-6-24-22(23)9-12-45(3)31(24)47)27-17-46(44-43-27)33(10-11-33)20-7-8-20/h4-6,9,12-14,16-17,20,30,42-44H,7-8,10-11,18H2,1-3H3,(H,40,41)/t30-/m0/s1	(S)-6-(((1-([1,1'-bi(cyclopropan)]- 1-yl)-1H-1,2,3- triazol-4-yl)(2-methyl-1-oxo- 1,2-dihydroisoquinolin- 5-yl)methyl)amino)-8-chloro- 4-((3,3,3-trifluoro-2,2- dimethylpropyl)amino)quinoline- 3-carbonitrile::US11066414, Compound 783	2	aid1805683	Gilead Sciences, Inc.	134212364
1059360	InChI=1S/C32H29ClF6N8O/c1-29(2,31(34,35)36)16-42-25-17(13-40)14-41-26-22(25)11-18(12-23(26)33)43-27(20-5-4-6-21-19(20)7-10-46(3)28(21)48)24-15-47(45-44-24)30(8-9-30)32(37,38)39/h4-7,10-12,14-15,27,43-45H,8-9,16H2,1-3H3,(H,41,42)/t27-/m0/s1	(S)-8-chloro-6-(((2-methyl-1-oxo-1,2- dihydroisoquinolin-5- yl)(1-(1-(trifluoromethyl)- cyclopropyl)-1H- 1,2,3-triazol-4-yl)methyl)amino)- 4-((3,3,3-trifluoro-2,2- dimethylpropyl)amino)- quinoline-3-carbonitrile::US11066414, Compound 780	5	aid1805683	Gilead Sciences, Inc.	134212363
1059358	InChI=1S/C31H34ClFN8O/c1-18(13-33)41-16-26(38-39-41)29(22-7-6-8-23-21(22)9-10-40(5)30(23)42)37-20-11-24-27(36-17-31(2,3)4)19(14-34)15-35-28(24)25(32)12-20/h6-12,15-16,18,29,37-39H,13,17H2,1-5H3,(H,35,36)/t18-,29-/m0/s1	8-chloro-6-(((S)-(1-((S)-1- fluoropropan-2-yl)-1H- 1,2,3-triazol-4-yl)(2-methyl-1-oxo-1,2- dihydroisoquinolin-5-yl)methyl)amino)-4- (neopentylamino)quinoline-3-carbonitrile::US11066414, Compound 778	4	aid1805683	Gilead Sciences, Inc.	134212362
1059361	InChI=1S/C32H32ClF3N8O/c1-30(2,32(34,35)36)17-39-26-18(14-37)15-38-27-23(26)12-19(13-24(27)33)40-28(25-16-44(42-41-25)31(3)9-10-31)21-6-5-7-22-20(21)8-11-43(4)29(22)45/h5-8,11-13,15-16,28,40-42H,9-10,17H2,1-4H3,(H,38,39)/t28-/m0/s1	(S)-8-chloro-6-(((2-methyl- 1-oxo-1,2-dihydroiso- quinolin-5-yl)(1-(1- methylcyclopropyl)-1H-1,2,3- triazol-4-yl)methyl)amino)-4- ((3,3,3-trifluoro-2,2- dimethylpropyl)amino)quinoline- 3-carbonitrile::US11066414, Compound 781	2	aid1805683	Gilead Sciences, Inc.	134212361
1059357	InChI=1S/C31H33ClF2N8O/c1-31(2,3)17-37-27-18(14-35)15-36-28-24(27)10-19(11-25(28)32)38-29(26-16-42(40-39-26)20(12-33)13-34)22-6-5-7-23-21(22)8-9-41(4)30(23)43/h5-11,15-16,20,29,38-40H,12-13,17H2,1-4H3,(H,36,37)/t29-/m0/s1	(S)-8-chloro-6-(((1-(1,3- difluoropropan-2-yl)-1H- 1,2,3-triazol-4-yl)(2-methyl-1-oxo-1,2- dihydroisoquinolin-5-yl)methyl)amino)-4- (neopentylamino)quinoline-3-carbonitrile::US11066414, Compound 777	5	aid1805683	Gilead Sciences, Inc.	134212360
1059356	InChI=1S/C32H35ClN8O/c1-31(2,3)18-36-27-19(15-34)16-35-28-24(27)13-20(14-25(28)33)37-29(26-17-41(39-38-26)32(4)10-11-32)22-7-6-8-23-21(22)9-12-40(5)30(23)42/h6-9,12-14,16-17,29,37-39H,10-11,18H2,1-5H3,(H,35,36)/t29-/m0/s1	(S)-8-chloro-6-(((2-methyl-1-oxo-1,2- dihydroisoquinolin- 5-yl)(1-(1-methylcyclopropyl)- 1H-1,2,3-triazol-4- yl)methyl)amino)-4- (neopentylamino)quinoline-3- carbonitrile::US11066414, Compound 776	2	aid1805683	Gilead Sciences, Inc.	134212359
1059355	InChI=1S/C32H34ClFN8O/c1-31(2,3)18-37-27-19(14-35)15-36-28-24(27)12-20(13-25(28)33)38-29(26-16-42(40-39-26)32(17-34)9-10-32)22-6-5-7-23-21(22)8-11-41(4)30(23)43/h5-8,11-13,15-16,29,38-40H,9-10,17-18H2,1-4H3,(H,36,37)/t29-/m0/s1	(S)-8-chloro-6-(((1-(1- (fluoromethyl)cyclopropyl)- 1H-1,2,3-triazol-4-yl)(2- methyl-1-oxo-1,2- dihydroisoquinolin-5- yl)methyl)amino)-4- (neopentylamino)quinoline-3- carbonitrile::US11066414, Compound 775	3	aid1805683	Gilead Sciences, Inc.	134212358
1059354	InChI=1S/C34H39ClN8O/c1-20(2)42-13-10-23-24(8-7-9-25(23)32(42)44)31(28-18-43(41-40-28)34(6)11-12-34)39-22-14-26-29(38-19-33(3,4)5)21(16-36)17-37-30(26)27(35)15-22/h7-10,13-15,17-18,20,31,39-41H,11-12,19H2,1-6H3,(H,37,38)/t31-/m0/s1	(S)-8-chloro-6-(((2-isopropyl-1-oxo-1,2- dihydroisoquinolin-5-yl)(1-(1 -methylcyclopropyl)- 1H-1,2,3-triazol-4- yl)methyl)amino)-4-(neopentyl- amino)quinoline-3-carbonitrile::US11066414, Compound 774	2	aid1805683	Gilead Sciences, Inc.	134212357
1059353	InChI=1S/C33H37ClN8O/c1-6-41-13-10-22-23(8-7-9-24(22)31(41)43)30(27-18-42(40-39-27)33(5)11-12-33)38-21-14-25-28(37-19-32(2,3)4)20(16-35)17-36-29(25)26(34)15-21/h7-10,13-15,17-18,30,38-40H,6,11-12,19H2,1-5H3,(H,36,37)/t30-/m0/s1	(S)-8-chloro-6-(((2-ethyl-1-oxo-1,2- dihydroisoquinolin-5-yl)(1-(1- methylcyclopropyl)- 1H-1,2,3-triazol-4-yl)methyl)amino)-4- (neopentylamino)quinoline-3- carbonitrile::US11066414, Compound 773	2	aid1805683	Gilead Sciences, Inc.	134212356
1059348	InChI=1S/C33H35ClN8O2/c1-32(2,18-43)17-37-28-20(14-35)15-36-29-25(28)9-21(10-26(29)34)38-30(27-16-42(40-39-27)33-11-19(12-33)13-33)23-5-4-6-24-22(23)7-8-41(3)31(24)44/h4-10,15-16,19,30,38-40,43H,11-13,17-18H2,1-3H3,(H,36,37)/t19?,30-,33?/m0/s1	(S)-6-(((1-(bicyclo[1.1.1]pentan- 1-yl)-1H-1,2,3-triazol- 4-yl)(2-methyl-1-oxo-1,2- dihydroisoquinolin-5- yl)methyl)amino)-8-chloro- 4-((3-hydroxy-2,2- dimethylpropyl)amino)quinoline- 3-carbonitrile::US11066414, Compound 768	6	aid1805683	Gilead Sciences, Inc.	134212355
1059349	InChI=1S/C34H37ClN8O/c1-5-42-10-9-23-24(7-6-8-25(23)32(42)44)31(28-18-43(41-40-28)34-13-20(14-34)15-34)39-22-11-26-29(38-19-33(2,3)4)21(16-36)17-37-30(26)27(35)12-22/h6-12,17-18,20,31,39-41H,5,13-15,19H2,1-4H3,(H,37,38)/t20?,31-,34?/m0/s1	(S)-6-(((1-(bicyclo[1.1.1]pentan- 1-yl)-1H-1,2,3-triazol- 4-yl)(2-ethyl-1-oxo-1,2- dihydroisoquinolin-5- yl)methyl)amino)-8-chloro-4- (neopentylamino)quinoline- 3-carbonitrile::US11066414, Compound 769	2	aid1805683	Gilead Sciences, Inc.	134212354
1059346	InChI=1S/C29H32ClFN8/c1-16-19(5-6-24(31)35-16)27(22-14-39(38-37-22)23-11-29(23)7-8-29)36-18-9-20-25(34-15-28(2,3)4)17(12-32)13-33-26(20)21(30)10-18/h5-6,9-10,13-14,23,27,36-38H,7-8,11,15H2,1-4H3,(H,33,34)/t23?,27-/m0/s1	8-chloro-6-(((1S)-(6-fluoro- 2-methylpyridin-3- yl)(1-(spiro[2.2]pentan-1-yl)- 1H-1,2,3-triazol- 4-yl)methyl)amino)-4- (neopentylamino)quinoline-3- carbonitrile::US11066414, Compound 766	2	aid1805683	Gilead Sciences, Inc.	134212353
1059342	InChI=1S/C27H30ClF3N8/c1-15-19(5-6-23(31)35-15)26(22-13-39(38-37-22)18(9-29)10-30)36-17-7-20-24(34-14-27(2,3)4)16(11-32)12-33-25(20)21(28)8-17/h5-8,12-13,18,26,36-38H,9-10,14H2,1-4H3,(H,33,34)/t26-/m0/s1	(S)-8-chloro-6-(((1-(1,3- difluoropropan-2-yl)- 1H-1,2,3-triazol-4-yl)(6- fluoro-2-methylpyridin- 3-yl)methyl)amino)-4- (neopentylamino)quinoline- 3-carbonitrile::US11066414, Compound 762	3	aid1805683	Gilead Sciences, Inc.	134212351
1059340	InChI=1S/C32H35ClN8O2/c1-31(2,3)16-36-27-19(13-34)14-35-28-24(27)11-20(12-25(28)33)37-29(26-15-41(39-38-26)32(4)17-43-18-32)22-7-6-8-23-21(22)9-10-40(5)30(23)42/h6-12,14-15,29,37-39H,16-18H2,1-5H3,(H,35,36)/t29-/m0/s1	(S)-8-chloro-6-(((2-methyl-1-oxo-1,2- dihydroisoquinolin-5-yl)(1- (3-methyloxetan-3-yl)- 1H-1,2,3-triazol-4-yl)methyl)amino)-4- (neopentylamino)quinoline-3- carbonitrile::US11066414, Compound 760	2	aid1805683	Gilead Sciences, Inc.	134212349
1059338	InChI=1S/C30H36ClFN8/c1-17-21(9-10-25(32)36-17)28(24-15-40(39-38-24)30(5,6)19-7-8-19)37-20-11-22-26(35-16-29(2,3)4)18(13-33)14-34-27(22)23(31)12-20/h9-12,14-15,19,28,37-39H,7-8,16H2,1-6H3,(H,34,35)/t28-/m0/s1	(S)-8-chloro-6-(((1-(2- cyclopropylpropan-2-yl)- 1H-1,2,3-triazol-4-yl)(6- fluoro-2-methylpyridin- 3-yl)methyl)amino)-4- (neopentylamino)quinoline- 3-carbonitrile::US11066414, Compound 758	4	aid1805683	Gilead Sciences, Inc.	134212348
1059334	InChI=1S/C29H34ClFN8/c1-6-29(9-10-29)39-15-23(37-38-39)27(20-7-8-24(31)35-17(20)2)36-19-11-21-25(34-16-28(3,4)5)18(13-32)14-33-26(21)22(30)12-19/h7-8,11-12,14-15,27,36-38H,6,9-10,16H2,1-5H3,(H,33,34)/t27-/m0/s1	(S)-8-chloro-6-(((1-(1- ethylcyclopropyl)-1H- 1,2,3-triazol-4-yl)(6-fluoro- 2-methylpyridin- 3-yl)methyl)amino)-4- (neopentylamino)quinoline- 3-carbonitrile::US11066414, Compound 754	3	aid1805683	Gilead Sciences, Inc.	134212347
1059332	InChI=1S/C29H32ClF3N8/c1-16-19(5-6-23(31)37-16)26(22-13-41(40-39-22)15-29(7-8-29)27(32)33)38-18-9-20-24(36-14-28(2,3)4)17(11-34)12-35-25(20)21(30)10-18/h5-6,9-10,12-13,26-27,38-40H,7-8,14-15H2,1-4H3,(H,35,36)/t26-/m0/s1	(S)-8-chloro-6-(((1-((1- (difluoromethyl)cyclopropyl)- methyl)-1H- 1,2,3-triazol-4-yl)(6-fluoro- 2-methylpyridin- 3-yl)methyl)amino)-4- (neopentylamino)quinoline- 3-carbonitrile::US11066414, Compound 752	5	aid1805683	Gilead Sciences, Inc.	134212346
1059328	InChI=1S/C28H30ClF3N8/c1-14-17(5-6-23(30)36-14)26(21-12-40(39-38-21)22-9-18(22)27(31)32)37-16-7-19-24(35-13-28(2,3)4)15(10-33)11-34-25(19)20(29)8-16/h5-8,11-12,18,22,26-27,37-39H,9,13H2,1-4H3,(H,34,35)/t18?,22-,26+/m1/s1	8-chloro-6-(((S)-(1-((1R,2R)-2- (difluoromethyl)cyclopropyl)- 1H-1,2,3-triazol-4- yl)(6-fluoro-2-methylpyridin- 3-yl)methyl)amino)- 4-(neopentylamino)quinoline-3- carbonitrile::US11066414, Compound 748	5	aid1805683	Gilead Sciences, Inc.	134212345
1059326	InChI=1S/C28H30ClF3N8O/c1-15-18(4-5-22(30)36-15)25(21-12-40(39-38-21)28(6-7-28)26(31)32)37-17-8-19-23(35-13-27(2,3)14-41)16(10-33)11-34-24(19)20(29)9-17/h4-5,8-9,11-12,25-26,37-39,41H,6-7,13-14H2,1-3H3,(H,34,35)/t25-/m0/s1	(S)-8-chloro-6-(((1-(1- (difluoromethyl)cyclopropyl)- 1H-1,2,3-triazol- 4-yl)(6-fluoro-2-methylpyridin-3- yl)methyl)amino)-4-((3-hydroxy-2,2- dimethylpropyl)amino)quinoline-3- carbonitrile::US11066414, Compound 746	13	aid1805683	Gilead Sciences, Inc.	134212344
1059324	InChI=1S/C32H33ClF2N8O/c1-31(2,3)17-38-26-18(14-36)15-37-27-23(26)12-19(13-24(27)33)39-28(25-16-43(41-40-25)32(9-10-32)30(34)35)21-6-5-7-22-20(21)8-11-42(4)29(22)44/h5-8,11-13,15-16,28,30,39-41H,9-10,17H2,1-4H3,(H,37,38)/t28-/m0/s1	(S)-8-chloro-6-(((1-(1- (difluoromethyl)cyclopropyl)- 1H-1,2,3-triazol-4-yl)(2-methyl-1-oxo-1,2- dihydroisoquinolin-5-yl)methyl)amino)-4- (neopentylamino)quinoline-3-carbonitrile::US11066414, Compound 744	3	aid1805683	Gilead Sciences, Inc.	134212343
1059322	InChI=1S/C28H21ClF5N9/c1-13-17(2-3-22(31)38-13)25(21-12-43(42-41-21)28(4-5-28)27(33)34)39-15-6-18-23(40-16-8-20(30)26(32)37-11-16)14(9-35)10-36-24(18)19(29)7-15/h2-3,6-8,10-12,25,27,39,41-42H,4-5H2,1H3,(H,36,40)/t25-/m0/s1	(S)-8-chloro-6-(((1-(1- (difluoromethyl)cyclopropyl)- 1H-1,2,3-triazol-4-yl)(6-fluoro- 2-methylpyridin-3- yl)methyl)amino)-4-((5,6- difluoropyridin-3- yl)amino)quinoline-3-carbonitrile::US11066414, Compound 742	17	aid1805683	Gilead Sciences, Inc.	134212342
1059319	InChI=1S/C29H28ClF3N8/c1-15-19(2-3-23(31)37-15)26(22-13-41(40-39-22)29(4-5-29)27(32)33)38-18-6-20-24(36-14-28-8-16(9-28)10-28)17(11-34)12-35-25(20)21(30)7-18/h2-3,6-7,12-13,16,26-27,38-40H,4-5,8-10,14H2,1H3,(H,35,36)/t16?,26-,28?/m0/s1	(S)-4-((bicyclo[1.1.1]pentan- 1-yl methyl)amino)-8- chloro-6-(((1-(1- (difluoromethyl)cyclopropyl)-1H- 1,2,3-triazol-4-yl)(6-fluoro- 2-methylpyridin-3- yl)methyl)amino)quinoline- 3-carbonitrile::US11066414, Compound 739	21	aid1805683	Gilead Sciences, Inc.	134212341
1059318	InChI=1S/C28H29ClN8S/c1-28(2,3)15-33-25-16(10-30)11-32-26-20(25)8-17(9-22(26)29)34-27(23-13-37(36-35-23)18-4-5-18)21-14-38-24-12-31-7-6-19(21)24/h6-9,11-14,18,27,34-36H,4-5,15H2,1-3H3,(H,32,33)/t27-/m0/s1	(S)-8-chloro-6-(((1-cyclopropyl- 1H-1,2,3-triazol- 4-yl)(thieno[2,3-c]pyridin-3- yl)methyl)amino)-4- (neopentylamino)quinoline- 3-carbonitrile::US11066414, Compound 738	2	aid1805683	Gilead Sciences, Inc.	134212340
1059320	InChI=1S/C29H27ClF4N8/c1-15-19(2-3-23(31)38-15)26(22-13-42(41-40-22)28(4-5-28)29(32,33)34)39-18-6-20-24(37-14-27-8-16(9-27)10-27)17(11-35)12-36-25(20)21(30)7-18/h2-3,6-7,12-13,16,26,39-41H,4-5,8-10,14H2,1H3,(H,36,37)/t16?,26-,27?/m0/s1	(S)-4-((bicyclo[1.1.1]pentan-1- ylmethyl)amino)-8- chloro-6-(((6-fluoro-2- methyl pyridin-3-yl)(1-(1- (trifluoromethyl)cyclopropyl)- 1H-1,2,3-triazol-4- yl)methyl)amino)quinoline-3- carbonitrile::US11066414, Compound 740	45	aid1805683	Gilead Sciences, Inc.	134212339
1059313	InChI=1S/C31H34ClF3N8/c1-16-19(6-7-24(33)39-16)27(22-15-43(42-41-22)31(8-9-31)28(34)35)40-18-10-20-25(38-14-23-29(2,3)30(23,4)5)17(12-36)13-37-26(20)21(32)11-18/h6-7,10-11,13,15,23,27-28,40-42H,8-9,14H2,1-5H3,(H,37,38)/t27-/m0/s1	(S)-8-chloro-6-(((1-(1- (difluoromethyl)cyclopropyl)- 1H-1,2,3-triazol-4-yl)(6-fluoro- 2-methylpyridin-3- yl)methyl)amino)-4-(((2,2,3,3- tetramethylcyclopropyl)methyl)- amino)quinoline-3- carbonitrile::US11066414, Compound 733	42	aid1805683	Gilead Sciences, Inc.	134212337
1059303	InChI=1S/C32H30ClF3N8/c1-3-25(19-7-5-4-6-8-19)41-28-20(15-37)16-38-29-23(28)13-21(14-24(29)33)40-30(22-9-10-27(34)39-18(22)2)26-17-44(43-42-26)32(11-12-32)31(35)36/h4-10,13-14,16-17,25,30-31,40,42-43H,3,11-12H2,1-2H3,(H,38,41)/t25-,30+/m1/s1	8-chloro-6-(((S)-(1-(1- (difluoromethyl)cyclopropyl)- 1H-1,2,3-triazol-4-yl)(6-fluoro- 2-methylpyridin-3- yl)methyl)amino)-4-(((R)-1-phenyl- propyl)amino)quinoline-3-carbonitrile::US11066414, Compound 723	4	aid1805683	Gilead Sciences, Inc.	134212334
1059297	InChI=1S/C29H33ClF2N8/c1-16-6-7-20(17(2)36-16)26(23-14-40(39-38-23)29(8-9-29)27(31)32)37-19-10-21-24(35-15-28(3,4)5)18(12-33)13-34-25(21)22(30)11-19/h6-7,10-11,13-14,26-27,37-39H,8-9,15H2,1-5H3,(H,34,35)/t26-/m0/s1	(S)-8-chloro-6-(((1-(1- (difluoromethyl)cyclopropyl)- 1H-1,2,3-triazol-4-yl)(2,6- dimethylpyridin-3- yl)methyl)amino)-4- (neopentylamino)quinoline- 3-carbonitrile::US11066414, Compound 717	8	aid1805683	Gilead Sciences, Inc.	134212333
1059294	InChI=1S/C37H46ClN9O/c1-36(2,3)22-41-32-23(19-39)20-40-33-29(32)17-24(18-30(33)38)42-34(27-9-8-10-28-26(27)13-14-45(7)35(28)48)31-21-47(44-43-31)25-11-15-46(16-12-25)37(4,5)6/h8-10,13-14,17-18,20-21,25,34,42-44H,11-12,15-16,22H2,1-7H3,(H,40,41)/t34-/m0/s1	(S)-6-(((1-(1-(tert-butyl)piperidin- 4-yl)-1H-1,2,3- triazol-4-yl)(2-methyl-1-oxo-1,2- dihydroisoquinolin-5- yl)methyl)amino)-8-chloro- 4-(neopentylamino)quinoline- 3-carbonitrile::US11066414, Compound 714	6	aid1805683	Gilead Sciences, Inc.	134212332
1059490	InChI=1S/C33H29F3N10/c1-31(2,3)18-42-29-21(15-39)16-41-28-20(14-38)11-22(12-25(28)29)43-30(24-7-6-19(13-37)27-23(24)5-4-10-40-27)26-17-46(45-44-26)32(8-9-32)33(34,35)36/h4-7,10-12,16-17,30,43-45H,8-9,18H2,1-3H3,(H,41,42)/t30-/m0/s1	(S)-6-(((8-cyanoquinolin-5-yl)(1-(1- (trifluoromethyl)cyclopropyl)- 1H-1,2,3-triazol- 4-yl)methyl)amino)-4- (neopentylamino)quinoline- 3,8-dicarbonitrile::US11066414, Compound 710::US11066414, Compound 910	5	aid1805683	Gilead Sciences, Inc.	134212330
1059285	InChI=1S/C31H30FN9/c1-31(2,3)17-37-29-20(13-34)15-36-28-19(12-33)9-21(10-24(28)29)38-30(26-16-41(40-39-26)27-11-25(27)32)23-6-4-5-18-14-35-8-7-22(18)23/h4-10,14-16,25,27,30,38-40H,11,17H2,1-3H3,(H,36,37)/t25-,27?,30-/m0/s1	6-(((SHH(1S,2S)-2- fluorocyclopropyl)-1H-1,2,3- triazol-4-yl)(isoquinolin-5- yl)methyl)amino)-4- (neopentylamino)quinoline-3,8- dicarbonitrile::US11066414, Compound 704	1	aid1805683	Gilead Sciences, Inc.	134212329
1059283	InChI=1S/C28H33ClN8S/c1-16-26(38-15-33-16)25(22-13-37(36-35-22)28(7-8-28)18-5-6-18)34-19-9-20-23(32-14-27(2,3)4)17(11-30)12-31-24(20)21(29)10-19/h9-10,12-13,15,18,25,34-36H,5-8,14H2,1-4H3,(H,31,32)/t25-/m1/s1	(R)-6-(((1-([1,1'-bi(cyclopropan)]- 1-yl)-1H-1,2,3- triazol-4-yl)(4-methylthiazol-5- yl)methyl)amino)- 8-chloro-4- (neopentylamino)quinoline- 3-carbonitrile::US11066414, Compound 702	4	aid1805683	Gilead Sciences, Inc.	134212328
1059275	InChI=1S/C31H34ClFN8/c1-30(2,3)18-37-27-19(14-34)15-36-28-23(27)12-20(13-24(28)32)38-29(26-16-41(40-39-26)31(4,5)17-33)22-8-6-10-25-21(22)9-7-11-35-25/h6-13,15-16,29,38-40H,17-18H2,1-5H3,(H,36,37)/t29-/m0/s1	(S)-8-chloro-6-(((1-(1-fluoro-2- methylpropan-2-yl)- 1H-1,2,3-triazol-4-yl)(quinolin-5- yl)methyl)amino)-4- (neopentylamino)quinoline- 3-carbonitrile::US11066414, Compound 694	7	aid1805683	Gilead Sciences, Inc.	134212326
1059274	InChI=1S/C31H33ClF2N8/c1-30(2,3)17-38-26-18(14-35)15-37-27-22(26)12-19(13-23(27)32)39-28(21-8-6-10-24-20(21)9-7-11-36-24)25-16-42(41-40-25)31(4,5)29(33)34/h6-13,15-16,28-29,39-41H,17H2,1-5H3,(H,37,38)/t28-/m0/s1	(S)-8-chloro-6-(((1-(1,1-difluoro-2- methylpropan-2- yl)-1H-1,2,3-triazol-4-yl)(quinolin-5- yl)methyl)amino)-4- (neopentylamino)quinoline-3- carbonitrile::US11066414, Compound 693	15	aid1805683	Gilead Sciences, Inc.	134212325
1059270	InChI=1S/C30H32F3N9/c1-17-6-7-22(18(2)38-17)27(24-15-42(41-40-24)29(8-9-29)30(31,32)33)39-21-10-19(12-34)25-23(11-21)26(20(13-35)14-36-25)37-16-28(3,4)5/h6-7,10-11,14-15,27,39-41H,8-9,16H2,1-5H3,(H,36,37)/t27-/m0/s1	(S)-6-(((2,6-dimethylpyridin-3-yl)(1-(1'- (trifluoromethyl)cyclopropyl)- 1H-1,2,3-triazol- 4-yl)methyl)amino)-4- (neopentylamino)quinoline-3,8- dicarbonitrile::US11066414, Compound 689	9	aid1805683	Gilead Sciences, Inc.	134212324
1059271	InChI=1S/C29H29F4N9/c1-16-5-6-20(26(30)38-16)25(22-14-42(41-40-22)28(7-8-28)29(31,32)33)39-19-9-17(11-34)23-21(10-19)24(18(12-35)13-36-23)37-15-27(2,3)4/h5-6,9-10,13-14,25,39-41H,7-8,15H2,1-4H3,(H,36,37)/t25-/m0/s1	(S)-6-(((2-fluoro-6-methylpyridin- 3-yl)(1-(1- (trifluoromethyl)cyclopropyl)- 1H-1,2,3- triazol-4-yl)methyl)amino)-4- (neopentylamino)quinoline- 3,8-dicarbonitrile::US11066414, Compound 690	21	aid1805683	Gilead Sciences, Inc.	134212323
1059269	InChI=1S/C28H29ClF4N8/c1-15-5-6-18(25(30)37-15)24(21-13-41(40-39-21)27(7-8-27)28(31,32)33)38-17-9-19-22(36-14-26(2,3)4)16(11-34)12-35-23(19)20(29)10-17/h5-6,9-10,12-13,24,38-40H,7-8,14H2,1-4H3,(H,35,36)/t24-/m0/s1	(S)-8-chloro-6-(((2-fluoro-6- methylpyridin-3- yl)(1-(1-(trifluoromethyl)- cyclopropyl)-1H-1,2,3- triazol-4-yl)methyl)amino)-4- (neopentylamino)quinoline-3- carbonitrile::US11066414, Compound 688	30	aid1805683	Gilead Sciences, Inc.	134212322
1059267	InChI=1S/C28H29ClFN9/c1-15-19(7-8-23(30)35-15)26(27-22(12-32)39(38-37-27)18-5-6-18)36-17-9-20-24(34-14-28(2,3)4)16(11-31)13-33-25(20)21(29)10-17/h7-10,13,18,26,36-38H,5-6,14H2,1-4H3,(H,33,34)/t26-/m0/s1	(S)-8-chloro-6-(((5-cyano-1-cyclopropyl- 1H-1,2,3-triazol-4-yl)(6-fluoro- 2-methylpyridin- 3-yl)methyl)amino)-4- (neopentylamino)quinoline-3- carbonitrile::US11066414, Compound 686	4	aid1805683	Gilead Sciences, Inc.	134212321
1059257	InChI=1S/C31H30ClF3N8O/c1-29(2,3)16-39-25-17(13-36)14-38-26-22(25)11-18(12-23(26)32)40-27(20-5-4-6-21-19(20)7-10-37-28(21)44)24-15-43(42-41-24)30(8-9-30)31(33,34)35/h4-7,10-12,14-15,27,37,40-42H,8-9,16H2,1-3H3,(H,38,39)/t27-/m0/s1	(S)-8-chloro-4-(neopentylamino)- 6-(((1-oxo-1,2- dihydroisoquinolin-5-yl)(1-(1- (trifluoromethyl)cyclopropyl)-1H- 1,2,3-triazol-4- yl)methyl)amino)quinoline-3- carbonitrile::US11066414, Compound 676	6	aid1805683	Gilead Sciences, Inc.	134212319
1059261	InChI=1S/C28H29ClFN9/c1-15-20(7-8-22(30)35-15)25(26-27(29)39(38-37-26)19-5-6-19)36-18-9-16(11-31)23-21(10-18)24(17(12-32)13-33-23)34-14-28(2,3)4/h7-10,13,19,25,36-38H,5-6,14H2,1-4H3,(H,33,34)/t25-/m0/s1	(S)-6-(((5-chloro-1-cyclopropyl- 1H-1,2,3-triazol- 4-yl)(6-fluoro-2-methylpyridin-3- yl)methyl)amino)-4- (neopentylamino)quinoline- 3,8-dicarbonitrile::US11066414, Compound 680	3	aid1805683	Gilead Sciences, Inc.	134212318
1059250	InChI=1S/C32H36ClFN8O/c1-18-22(6-7-27(34)37-18)30(25-16-42(41-40-25)32(9-10-32)20-4-5-20)38-21-12-23-28(39-26-8-11-43-17-31(26,2)3)19(14-35)15-36-29(23)24(33)13-21/h6-7,12-13,15-16,20,26,30,38,40-41H,4-5,8-11,17H2,1-3H3,(H,36,39)/t26-,30+/m1/s1	US11066414, Compound 669::bi(cyclopropan)]-1-yl)- 1H-1,2,3-triazol-4-yl)(6- fluoro-2-methylpyridin-3- yl)methyl)amino)-8- chloro-4-(((R)-3,3- dimethyltetrahydro-2H-pyran- 4-yl)amino)quinoline-3-carbonitrile	1	aid1805683	Gilead Sciences, Inc.	134212315
1059248	InChI=1S/C33H32F3N9/c1-19-14-39-15-20-6-5-7-24(27(19)20)30(26-17-45(44-43-26)32(8-9-32)33(34,35)36)42-23-10-21(12-37)28-25(11-23)29(22(13-38)16-40-28)41-18-31(2,3)4/h5-7,10-11,14-17,30,42-44H,8-9,18H2,1-4H3,(H,40,41)/t30-/m0/s1	(S)-6-(((4-methylisoquinolin- 5-yl)(4-(1- (trifluoromethyl)cyclopropyl)- 1H-1,2,3-triazol- 4-yl)methyl)amino)-4- (neopentylamino)quinoline- 3,8-dicarbonitrile::US11066414, Compound 667	10	aid1805683	Gilead Sciences, Inc.	134212314
1059247	InChI=1S/C26H29ClF3N9/c1-24(2,3)14-33-21-15(11-31)12-32-22-17(21)9-16(10-18(22)27)35-23(20-5-8-34-38(20)4)19-13-39(37-36-19)25(6-7-25)26(28,29)30/h5,8-10,12-13,23,35-37H,6-7,14H2,1-4H3,(H,32,33)/t23-/m1/s1	(S)-8-chloro-6-(((1-methyl- 1H-pyrazol-S-yl)(1-(1- (trifluoromethyl)cyclopropyl)- 1H-1,2,3-triazol-4- yl)methyl)amino)-4- (neopentylamino)quinoline- 3-carbonitrile::US11066414, Compound 666	13	aid1805683	Gilead Sciences, Inc.	134212313
1059243	InChI=1S/C27H29Cl2FN8/c1-14-18(7-8-21(30)34-14)24(25-26(29)38(37-36-25)17-5-6-17)35-16-9-19-22(33-13-27(2,3)4)15(11-31)12-32-23(19)20(28)10-16/h7-10,12,17,24,35-37H,5-6,13H2,1-4H3,(H,32,33)/t24-/m0/s1	(S)-8-chloro-6-(((5-chloro-1- cyclopropyl-1H-1,2,3- triazol-4-yl)(6-fluoro-2-methylpyridin-3- yl)methyl)amino)-4- (neopentylamino)quinoline- 3-carbonitrile::US11066414, Compound 662	6	aid1805683	Gilead Sciences, Inc.	134212312
1059240	InChI=1S/C32H32ClF3N8/c1-18-13-38-14-19-6-5-7-22(26(18)19)29(25-16-44(43-42-25)31(8-9-31)32(34,35)36)41-21-10-23-27(40-17-30(2,3)4)20(12-37)15-39-28(23)24(33)11-21/h5-7,10-11,13-16,29,41-43H,8-9,17H2,1-4H3,(H,39,40)/t29-/m0/s1	(S)-8-chloro-6-(((4- methylisoquinolin-5-yl)(1-(1- (trifluoromethyl)cyclopropyl)- 1H-1,2,3-triazol-4- yl)methyl)amino)-4- (neopentylamino)quinoline- 3-carbonitrile::US11066414, Compound 659	41	aid1805683	Gilead Sciences, Inc.	134212311
1059241	InChI=1S/C32H32ClF3N8/c1-18-8-11-38-24-7-5-6-21(26(18)24)29(25-16-44(43-42-25)31(9-10-31)32(34,35)36)41-20-12-22-27(40-17-30(2,3)4)19(14-37)15-39-28(22)23(33)13-20/h5-8,11-13,15-16,29,41-43H,9-10,17H2,1-4H3,(H,39,40)/t29-/m0/s1	(S)-8-chloro-6-(((4-methylquinolin- 5-yl)(1-(1- (trifluoromethyl)cyclopropyl)- 1H-1,2,3-triazol- 4-yl)methyl)amino)-4- (neopentylamino)quinoline- 3-carbonitrile::US11066414, Compound 660	43	aid1805683	Gilead Sciences, Inc.	134212310
1059239	InChI=1S/C30H31ClF3N9/c1-28(2,3)16-38-24-17(13-35)14-37-25-21(24)11-18(12-22(25)31)39-26(19-5-9-36-27-20(19)6-10-42(27)4)23-15-43(41-40-23)29(7-8-29)30(32,33)34/h5-6,9-12,14-15,26,39-41H,7-8,16H2,1-4H3,(H,37,38)/t26-/m0/s1	(S)-8-chloro-6-(((1-methyl- 1H-pyrrolo[2,3-b]pyridin- 4-yl)(1-(1-(trifluoromethyl)- cyclopropyl)-1H- 1,2,3-triazol-4- yl)methyl)amino)-4- (neopentylamino)quinoline-3- carbonitrile::US11066414, Compound 658	29	aid1805683	Gilead Sciences, Inc.	134212309
1059235	InChI=1S/C31H30ClF3N8/c1-17-20(8-9-27(35)39-17)30(26-15-43(42-41-26)14-22-24(33)6-5-7-25(22)34)40-19-10-21-28(38-16-31(2,3)4)18(12-36)13-37-29(21)23(32)11-19/h5-11,13,15,30,40-42H,14,16H2,1-4H3,(H,37,38)/t30-/m0/s1	(S)-8-chloro-6-(((1-(2,6- difluorobenzyl)-1H-1,2,3- triazol-4-yl)(6-fluoro-2- methylpyridin-3- yl)methyl)amino)-4- (neopentylamino)quinoline-3- carbonitrile::US11066414, Compound 654	3	aid1805683	Gilead Sciences, Inc.	134212306
1059228	InChI=1S/C28H32ClFN8/c1-15-20(8-9-23(30)34-15)27(24-16(2)38(37-36-24)19-6-7-19)35-18-10-21-25(33-14-28(3,4)5)17(12-31)13-32-26(21)22(29)11-18/h8-11,13,19,27,35-37H,6-7,14H2,1-5H3,(H,32,33)/t27-/m0/s1	(S)-8-chloro-6-(((1-cyclopropyl- 5-methyl-1H-1,2,3- triazol-4-yl)(6-fluoro-2- methylpyridin-3- yl)methyl)amino)-4- (neopentylamino)quinoline- 3-carbonitrile::US11066414, Compound 647	3	aid1805683	Gilead Sciences, Inc.	134212304
1059226	InChI=1S/C28H30ClF3N8/c1-15-19(5-6-23(30)36-15)26(22-13-40(39-38-22)18-9-28(31,32)10-18)37-17-7-20-24(35-14-27(2,3)4)16(11-33)12-34-25(20)21(29)8-17/h5-8,12-13,18,26,37-39H,9-10,14H2,1-4H3,(H,34,35)/t26-/m0/s1	(S)-8-chloro-6-(((1-(3,3- difluorocyclobutyl)-1H- 1,2,3-triazol-4-yl)(6-fluoro- 2-methylpyridin-3- yl)methyl)amino)-4- (neopentylamino)quinoline- 3-carbonitrile::US11066414, Compound 645	11	aid1805683	Gilead Sciences, Inc.	134212303
1059225	InChI=1S/C29H29F4N9O/c1-16-20(5-6-23(30)38-16)26(22-12-42(41-40-22)28(14-43-15-28)29(31,32)33)39-19-7-17(9-34)24-21(8-19)25(18(10-35)11-36-24)37-13-27(2,3)4/h5-8,11-12,26,39-41H,13-15H2,1-4H3,(H,36,37)/t26-/m0/s1	(S)-6-(((6-fluoro-2-methylpyridin- 3-yl)(1-(3- (trifluoromethyl)oxetan-3-yl)- 1H-1,2,3-triazol- 4-yl)methyl)amino)-4- (neopentylamino)quinoline- 3,8-dicarbonitrile::US11066414, Compound 644	7	aid1805683	Gilead Sciences, Inc.	134212302
1059222	InChI=1S/C27H29F2N9S/c1-15-21(34-14-39-15)24(20-12-38(37-36-20)27(5-6-27)25(28)29)35-18-7-16(9-30)22-19(8-18)23(17(10-31)11-32-22)33-13-26(2,3)4/h7-8,11-12,14,24-25,35-37H,5-6,13H2,1-4H3,(H,32,33)/t24-/m1/s1	(S)-6-(((M1-(difluoromethyl)- cyclopropyl)-1H-1,2,3- triazol-4-yl)(5-methylthiazol-4- yl)methyl)amino)-4- (neopentylamino)quinoline-3,8- dicarbonitrile::US11066414, Compound 641	55	aid1805683	Gilead Sciences, Inc.	134212301
1059220	InChI=1S/C27H31ClF2N8O/c1-14-21(34-15(2)39-14)24(20-12-38(37-36-20)27(6-7-27)25(29)30)35-17-8-18-22(33-13-26(3,4)5)16(10-31)11-32-23(18)19(28)9-17/h8-9,11-12,24-25,35-37H,6-7,13H2,1-5H3,(H,32,33)/t24-/m1/s1	(S)-8-chloro-6-(((1-(1- (difluoromethyl)cyclopropyl)- 1H-1,2,3-triazol-4-yl)(2,5- dimethyloxazol-4- yl)methyl)amino)-4- (neopentylamino)quinoline-3- carbonitrile::US11066414, Compound 639	58	aid1805683	Gilead Sciences, Inc.	134212300
1059218	InChI=1S/C29H28ClF4N9/c1-16-20(4-5-23(31)39-16)26(22-13-43(42-41-22)28(6-7-28)29(32,33)34)40-19-8-17(10-35)24-21(9-19)25(18(11-36)12-37-24)38-15-27(2,3)14-30/h4-5,8-9,12-13,26,40-42H,6-7,14-15H2,1-3H3,(H,37,38)/t26-/m0/s1	(S)-4-((3-chloro-2,2- dimethylpropyl)amino)-6-(((6- fluoro-2-methylpyridin-3-yl)(1- (1-(trifluoromethyl)- cyclopropyl)-1H-1,2,3-triazol-4- yl)methyl)amino)- quinoline-3,8-dicarbonitrile::US11066414, Compound 637	3	aid1805683	Gilead Sciences, Inc.	134212299
1059217	InChI=1S/C28H25ClF6N8/c1-14-17(2-3-21(30)39-14)24(20-12-43(42-41-20)27(6-7-27)28(33,34)35)40-16-8-18-22(38-13-26(4-5-26)25(31)32)15(10-36)11-37-23(18)19(29)9-16/h2-3,8-9,11-12,24-25,40-42H,4-7,13H2,1H3,(H,37,38)/t24-/m0/s1	(S)-8-chloro-4-(((1- (difluoromethyl)cyclopropyl)- methyl)amino)-6-(((6-fluoro-2- methylpyridin-3- yl)(1-(1-(trifluoromethyl)cyclopropyl)- 1H-1,2,3- triazol-4- yl)methyl)amino)quinoline-3-carbonitrile::US11066414, Compound 636	69	aid1805683	Gilead Sciences, Inc.	134212298
1059203	InChI=1S/C28H29F2N9/c1-15-19(5-6-24(30)35-15)27(22-13-39(38-37-22)23-9-21(23)29)36-18-7-16(10-31)25-20(8-18)26(17(11-32)12-33-25)34-14-28(2,3)4/h5-8,12-13,21,23,27,36-38H,9,14H2,1-4H3,(H,33,34)/t21-,23+,27-/m0/s1	6-(((S)-(6-fluoro-2-methylpyridin-3-yl)(1- ((1R,2S)-2-fluorocyclopropyl)- 1H-1,2,3-triazol- 4-yl)methyl)amino)-4- (neopentylamino)quinoline- 3,8-dicarbonitrile::US11066414, Compound 622	1	aid1805683	Gilead Sciences, Inc.	134212296
1059199	InChI=1S/C32H32ClF3N8O/c1-30(2,3)17-39-26-18(14-37)15-38-27-23(26)12-19(13-24(27)33)40-28(21-6-5-7-22-20(21)8-11-43(4)29(22)45)25-16-44(42-41-25)31(9-10-31)32(34,35)36/h5-8,11-13,15-16,28,40-42H,9-10,17H2,1-4H3,(H,38,39)/t28-/m0/s1	(S)-8-chloro-6-(((2-methyl-1-oxo-1,2- dihydroisoquinolin-5-yl)(1-(1- (trifluoromethyl)cyclopropyl)-1H-1,2,3-triazol- 4-yl)methyl)amino)-4- (neopentylamino)quinoline-3-carbonitrile::US11066414, Compound 618	3	aid1805683	Gilead Sciences, Inc.	134212295
1059200	InChI=1S/C26H29ClF2N8S/c1-14-23(38-13-33-14)22(19-11-37(36-35-19)26(5-6-26)24(28)29)34-16-7-17-20(32-12-25(2,3)4)15(9-30)10-31-21(17)18(27)8-16/h7-8,10-11,13,22,24,34-36H,5-6,12H2,1-4H3,(H,31,32)/t22-/m1/s1	(R)-8-chloro-6-(((1-(1-(difluoromethyl)- cyclopropyl)-1H-1,2,3-triazol-4-yl)(4- methylthiazol-5-yl)methyl)amino)-4- (neopentylamino)quinoline-3-carbonitrile::US11066414, Compound 619	7	aid1805683	Gilead Sciences, Inc.	134212294
1059189	InChI=1S/C28H25ClF4N8O/c1-13-16(2-3-22(30)36-13)26(21-10-41(40-39-21)27(4-5-27)28(31,32)33)37-15-6-17-23(38-24-18-11-42-12-19(18)24)14(8-34)9-35-25(17)20(29)7-15/h2-3,6-7,9-10,18-19,24,26,37,39-40H,4-5,11-12H2,1H3,(H,35,38)/t18?,19?,24?,26-/m0/s1	4-(((lR,5S,6r)-3-oxabicyclo[3.1.0]hexan-6- yl)amino)-8-chloro-6-(((S)-(6-fluoro-2- methylpyridin-3-yl)(1- (1-(trifluoromethyl)cyclo- propyl)-1H-1,2,3-triazol-4-yl)methyl)amino)- quinoline-3-carbonitrile::US11066414, Compound 608	42	aid1805683	Gilead Sciences, Inc.	134212293
1059195	InChI=1S/C34H31F4N9/c1-20-25(9-10-28(35)43-20)31(27-18-47(46-45-27)33(11-12-33)34(36,37)38)44-24-13-21(15-39)29-26(14-24)30(22(16-40)17-41-29)42-19-32(2,3)23-7-5-4-6-8-23/h4-10,13-14,17-18,31,44-46H,11-12,19H2,1-3H3,(H,41,42)/t31-/m0/s1	(S)-6-(((6-fluoro-2-methylpyridin-3-yl)(1-(1- (trifluoromethyl)cyclopropyl)-1H-1,2,3-triazol- 4-yl)methyl)amino)-4-((2-methyl-2- phenylpropyl)amino)quinoline-3,8- dicarbonitrile::US11066414, Compound 614	9	aid1805683	Gilead Sciences, Inc.	134212292
1059188	InChI=1S/C29H27ClF4N8/c1-14-17(5-6-23(31)37-14)27(22-13-42(41-40-22)28(7-8-28)29(32,33)34)38-16-9-20-24(39-25-18-3-2-4-19(18)25)15(11-35)12-36-26(20)21(30)10-16/h5-6,9-10,12-13,18-19,25,27,38,40-41H,2-4,7-8H2,1H3,(H,36,39)/t18?,19?,25?,27-/m0/s1	4-(((lR,5S)- bicyclo[3.1.0]hexan-6-yl)amino)-8- chloro-6-(((S)-(6-fluoro-2-methylpyridin-3- yl)(1-(1-(trifluoromethyl)cyclopropyl)-1H- 1,2,3-triazol-4-yl)methyl)amino)quinoline-3- carbonitrile::US11066414, Compound 607	21	aid1805683	Gilead Sciences, Inc.	134212290
1059187	InChI=1S/C30H33F2N9/c1-5-23-21(7-6-10-35-23)27(24-16-41(40-39-24)30(8-9-30)28(31)32)38-20-11-18(13-33)25-22(12-20)26(19(14-34)15-36-25)37-17-29(2,3)4/h6-7,10-12,15-16,27-28,38-40H,5,8-9,17H2,1-4H3,(H,36,37)/t27-/m0/s1	(S)-6-(((1-{1-(difluoromethyl)- cyclopropyl)-1H- 1,2,3-triazol-4-yl)(2-ethylpyridin-3- yl)methyl)amino)-4- (neopentylamino)quinoline- 3,8-dicarbonitrile::US11066414, Compound 606	2	aid1805683	Gilead Sciences, Inc.	134212289
1059177	InChI=1S/C29H32FN9O/c1-17-20(6-7-24(30)35-17)26(22-14-39(38-37-22)29(15-32)8-9-29)36-19-10-21-25(34-16-28(2,3)4)18(12-31)13-33-27(21)23(11-19)40-5/h6-7,10-11,13-14,26,36-38H,8-9,16H2,1-5H3,(H,33,34)/t26-/m0/s1	(S)-6-(((1-(1-cyanocyclopropyl)- 1H-1,2,3-triazol- 4-yl)(6-fluoro-2-methylpyridin- 3-yl)methyl)amino)- 8-methoxy-4- (neopentylamino)quinoline-3- carbonitrile::US11066414, Compound 596	79	aid1805683	Gilead Sciences, Inc.	134212287
1059173	InChI=1S/C29H32ClF3N8/c1-5-21-18(6-7-23(31)38-21)26(22-14-41(40-39-22)29(8-9-29)27(32)33)37-17-10-19-24(36-15-28(2,3)4)16(12-34)13-35-25(19)20(30)11-17/h6-7,10-11,13-14,26-27,37,39-40H,5,8-9,15H2,1-4H3,(H,35,36)/t26-/m0/s1	(S)-8-chloro-6-(((1-(1-(difluoromethyl)cyclo- propyl)-1H-1,2,3-triazol-4-yl)(2-ethyl-6- fluoropyridin-3-yl)methyl)amino)-4- (neopentylamino)quinoline-3-carbonitrile::US11066414, Compound 592	5	aid1805683	Gilead Sciences, Inc.	134212286
1059156	InChI=1S/C32H32N10O/c1-31(2,3)18-38-28-20(15-34)16-37-27-19(14-33)12-21(13-24(27)28)39-29(23-6-4-8-25-22(23)7-5-11-36-25)26-17-42(41-40-26)32(9-10-32)30(35)43/h4-8,11-13,16-17,29,39-41H,9-10,18H2,1-3H3,(H2,35,43)(H,37,38)/t29-/m0/s1	(S)-1-(4-(((3,8-dicyano-4-(neopentylamino)- quinolin-6-yl)amino)(quinolin-5-yl)methyl)- 1H-1,2,3-triazol-1-yl)cyclopropane-1- carboxamide::US11066414, Compound 575	1	aid1805683	Gilead Sciences, Inc.	134212285
1059164	InChI=1S/C30H31F4N9/c1-16-21(6-7-24(31)38-16)27(23-15-43(42-41-23)29(8-9-29)30(32,33)34)40-20-10-18(12-35)25-22(11-20)26(19(13-36)14-37-25)39-17(2)28(3,4)5/h6-7,10-11,14-15,17,27,40-42H,8-9H2,1-5H3,(H,37,39)/t17-,27+/m1/s1	4-(((R)-3,3-dimethylbutan- 2-yl)amino)-6-(((S)- (6-fluoro-2-methylpyridin-3-yl)(1-(1- (trifluoromethyl)cyclopropyl)- 1H-1,2,3-triazol- 4-yl)methyl)amino)quinoline- 3,8-dicarbonitrile::US11066414, Compound 583	4	aid1805683	Gilead Sciences, Inc.	134212284
1059154	InChI=1S/C31H31F3N10/c1-29(2,3)17-38-26-20(13-36)14-37-25-19(12-35)10-21(11-23(25)26)39-28(22-7-5-6-18-15-43(4)41-27(18)22)24-16-44(42-40-24)30(8-9-30)31(32,33)34/h5-7,10-11,14-16,28,39-40,42H,8-9,17H2,1-4H3,(H,37,38)/t28-/m0/s1	(S)-6-(((2-methyl-2H-indazol-7-yl)(1-(1- (trifluoromethyl)cyclopropyl)-1H-1,2,3- triazol-4-yl)methyl)amino)-4- (neopentylamino)quinoline-3,8-dicarbonitrile::US11066414, Compound 573	66	aid1805683	Gilead Sciences, Inc.	134212283
1059153	InChI=1S/C30H29F3N10/c1-28(2,3)17-37-26-19(14-35)15-36-25-18(13-34)11-20(12-22(25)26)39-27(21-5-4-10-42-24(21)6-9-38-42)23-16-43(41-40-23)29(7-8-29)30(31,32)33/h4-6,9-12,15-16,27,39-41H,7-8,17H2,1-3H3,(H,36,37)/t27-/m0/s1	(S)-4-(neopentylamino)-6-((pyrazolo[1,5- a]pyridin-4-yl(1-(1-(trifluoromethyl)cyclo- propyl)-1H-1,2,3-triazol-4- yl)methyl)amino)quinoline-3,8-dicarbonitrile::US11066414, Compound 572	4	aid1805683	Gilead Sciences, Inc.	134212282
1059150	InChI=1S/C32H32FN9/c1-31(2,3)19-38-29-22(14-35)16-37-28-21(13-34)11-23(12-26(28)29)39-30(25-6-4-5-20-15-36-10-7-24(20)25)27-17-42(41-40-27)32(18-33)8-9-32/h4-7,10-12,15-17,30,39-41H,8-9,18-19H2,1-3H3,(H,37,38)/t30-/m0/s1	(S)-6-(((Ml-(fluoromethyl)cyclopropyl)-1H- 1,2,3-triazol-4-yl)(isoquinolin-5-yl)methyl)- amino)-4-(neopentylamino)quinoline-3,8- dicarbonitrile::US11066414, Compound 569	7	aid1805683	Gilead Sciences, Inc.	134212280
1059148	InChI=1S/C31H30ClN9/c1-30(2,3)18-37-27-19(14-33)15-36-28-23(27)12-20(13-24(28)32)38-29(22-6-4-8-25-21(22)7-5-11-35-25)26-16-41(40-39-26)31(17-34)9-10-31/h4-8,11-13,15-16,29,38-40H,9-10,18H2,1-3H3,(H,36,37)/t29-/m0/s1	(S)-8-chloro-6-(((1-(1-cyanocyclopropyl)- 1H-1,2,3-triazol-4-yl)(quinolin-5- yl)methyl)amino)-4-(neopentylamino)- quinoline-3-carbonitrile::US11066414, Compound 567	2	aid1805683	Gilead Sciences, Inc.	134212279
1059147	InChI=1S/C32H34ClN9O/c1-31(2,3)18-38-27-19(15-34)16-37-28-23(27)13-20(14-24(28)33)39-29(22-7-4-9-25-21(22)8-5-12-36-25)26-17-42(41-40-26)32(30(35)43)10-6-11-32/h4-5,7-9,12-14,16-17,29,39-41H,6,10-11,18H2,1-3H3,(H2,35,43)(H,37,38)/t29-/m0/s1	(S)-1-(4-(((8-chloro-3-cyano-4-(neopentyl- amino)quinolin-6-yl)amino)(quinolin-5- yl)methyl)-1H-1,2,3-triazol-1- yl)cyclobutane- 1-carboxamide::US11066414, Compound 566	2	aid1805683	Gilead Sciences, Inc.	134212278
1059146	InChI=1S/C31H32ClN9O/c1-30(2,3)17-37-26-18(14-33)15-36-27-22(26)12-19(13-23(27)32)38-28(21-6-4-8-24-20(21)7-5-11-35-24)25-16-41(40-39-25)31(9-10-31)29(34)42/h4-8,11-13,15-16,28,38-40H,9-10,17H2,1-3H3,(H2,34,42)(H,36,37)/t28-/m0/s1	(S)-1-(4-(((8-chloro-3-cyano-4-(neopentyl- amino)quinolin-6-yl)amino)(quinolin-5- yl)methyl)-1H-1,2,3-triazol-1-yl)cyclo- propane-1-carboxamide::US11066414, Compound 565	2	aid1805683	Gilead Sciences, Inc.	134212277
1059145	InChI=1S/C31H33ClN8/c1-30(2,3)18-36-27-20(14-33)16-35-28-24(27)12-21(13-25(28)32)37-29(26-17-40(39-38-26)31(4)9-10-31)23-7-5-6-19-15-34-11-8-22(19)23/h5-8,11-13,15-17,29,37-39H,9-10,18H2,1-4H3,(H,35,36)/t29-/m0/s1	(S)-8-chloro-6-((isoquinolin-5-yl(1-(1- methylcyclopropyl)-1H-1,2,3-triazol-4- yl)methyl)amino)-4-(neopentylamino)- quinoline-3-carbonitrile::US11066414, Compound 564	3	aid1805683	Gilead Sciences, Inc.	134212276
1059141	InChI=1S/C29H29ClF3N9/c1-27(2,3)16-36-24-17(13-34)14-35-25-20(24)11-18(12-21(25)30)38-26(19-5-4-10-41-23(19)6-9-37-41)22-15-42(40-39-22)28(7-8-28)29(31,32)33/h4-6,9-12,14-15,26,38-40H,7-8,16H2,1-3H3,(H,35,36)/t26-/m0/s1	(S)-8-chloro-4-(neopentylamino)-6- ((pyrazolo[1,5-a]pyridin-4-yl(1-(1- (trifluoromethyl)cyclopropyl)-1H-1,2,3- triazol-4-yl)methyl)amino)quinoline-3- carbonitrile::US11066414, Compound 560	11	aid1805683	Gilead Sciences, Inc.	134212274
1059139	InChI=1S/C31H31F3N10/c1-29(2,3)17-38-27-19(13-36)14-37-26-18(12-35)10-20(11-22(26)27)39-28(21-6-5-7-24-23(21)15-43(4)41-24)25-16-44(42-40-25)30(8-9-30)31(32,33)34/h5-7,10-11,14-16,28,39-40,42H,8-9,17H2,1-4H3,(H,37,38)/t28-/m0/s1	(S)-6-(((2-methyl-2H-indazol-4-yl)(1-(1- (trifluoromethyl)cyclopropyl)-1H-1,2,3- triazol-4-yl)methyl)amino)-4-(neopentyl- amino)quinoline-3,8-dicarbonitrile::US11066414, Compound 558	3	aid1805683	Gilead Sciences, Inc.	134212273
1059140	InChI=1S/C30H33F2N11/c1-29(2,3)16-36-25-18(13-34)14-35-24-17(12-33)10-19(11-21(24)25)37-26(20-6-5-7-22-27(20)42(4)40-38-22)23-15-43(41-39-23)30(8-9-30)28(31)32/h5-7,10-11,14-15,26,28,37-41H,8-9,16H2,1-4H3,(H,35,36)/t26-/m0/s1	(S)-6-(((4-(1-1-(difluoromethyl)cyclopropyl)- 1H-1,2,3-triazol-4-yl)(1- methyl-1H-benzo[d] [1,2,3]triazol-7-yl)methyl)amino)-4- (neopentylamino)quinoline-3,8- dicarbonitrile::US11066414, Compound 559	2	aid1805683	Gilead Sciences, Inc.	134212272
1059136	InChI=1S/C32H37ClFN9O2/c1-19-22(5-6-26(34)38-19)29(25-17-43(41-40-25)32(7-8-32)30(44)42-9-11-45-12-10-42)39-21-13-23-27(37-18-31(2,3)4)20(15-35)16-36-28(23)24(33)14-21/h5-6,13-14,16-17,29,39-41H,7-12,18H2,1-4H3,(H,36,37)/t29-/m0/s1	(S)-8-chloro-6-(((6-fluoro-2-methylpyridin-3- yl)(1-(1-(morpholine-4- carbonyl)cyclopropyl)- 1H-1,2,3-triazol-4-yl)methyl)amino)-4- (neopentylamino)quinoline-3-carbonitrile::US11066414, Compound 555	7	aid1805683	Gilead Sciences, Inc.	134212271
1059133	InChI=1S/C32H31F2N9/c1-31(2,3)18-39-28-21(14-36)15-38-27-20(13-35)11-22(12-24(27)28)40-29(23-6-4-5-19-7-10-37-16-25(19)23)26-17-43(42-41-26)32(8-9-32)30(33)34/h4-7,10-12,15-17,29-30,40-42H,8-9,18H2,1-3H3,(H,38,39)/t29-/m0/s1	(S)-6-(((1-(1- (difluoromethyl)cyclopropyl)-1H- 1,2,3-triazol-4-yl)(isoquinolin-8-yl)methyl)- amino)-4-(neopentylamino)quinoline-3,8- dicarbonitrile::US11066414, Compound 552	2	aid1805683	Gilead Sciences, Inc.	134212270
1059132	InChI=1S/C32H31F2N9/c1-31(2,3)18-39-28-21(14-36)16-38-27-20(13-35)11-22(12-25(27)28)40-29(24-6-4-5-19-15-37-10-7-23(19)24)26-17-43(42-41-26)32(8-9-32)30(33)34/h4-7,10-12,15-17,29-30,40-42H,8-9,18H2,1-3H3,(H,38,39)/t29-/m0/s1	(S)-6-(((4-(1-(1-(difluoromethyl)- cyclopropyl)-1H- 1,2,3-triazol-4-yl)(isoquinolin-5- yl)methyl)amino)-4-(neopentylamino)- quinoline-3,8-dicarbonitrile::US11066414, Compound 551	2	aid1805683	Gilead Sciences, Inc.	134212269
1059123	InChI=1S/C29H33ClF2N10/c1-28(2,3)15-35-23-16(12-33)13-34-24-19(23)10-17(11-20(24)30)36-25(18-6-5-7-21-26(18)41(4)39-37-21)22-14-42(40-38-22)29(8-9-29)27(31)32/h5-7,10-11,13-14,25,27,36-40H,8-9,15H2,1-4H3,(H,34,35)/t25-/m0/s1	(S)-8-chloro-6-(((1-(1-(difluoromethyl)- cyclopropyl)-1H-1,2,3-triazol-4-yl)(1- methyl-1H-benzo[d][1,2,3]triazol-7- yl)methyl)amino)-4-(neopentylamino)- quinoline-3-carbonitrile::US11066414, Compound 542	2	aid1805683	Gilead Sciences, Inc.	134212268
1059124	InChI=1S/C30H31ClF3N9/c1-28(2,3)16-37-25-17(12-35)13-36-26-20(25)10-18(11-22(26)31)39-27(19-6-5-7-24-21(19)14-38-42(24)4)23-15-43(41-40-23)29(8-9-29)30(32,33)34/h5-7,10-11,13-15,27,39-41H,8-9,16H2,1-4H3,(H,36,37)/t27-/m0/s1	(S)-8-chloro-6-(((1-methyl-1H-indazol- 4-yl)(1-(1-(trifluoromethyl)cyclopropyl)- 1H-1,2,3-triazol-4-yl)methyl)amino)-4- (neopentylamino)quinoline-3-carbonitrile::US11066414, Compound 543	13	aid1805683	Gilead Sciences, Inc.	134212267
1059125	InChI=1S/C30H31ClF3N9/c1-28(2,3)16-37-25-17(12-35)13-36-26-20(25)10-18(11-22(26)31)38-27(19-6-5-7-23-21(19)14-42(4)40-23)24-15-43(41-39-24)29(8-9-29)30(32,33)34/h5-7,10-11,13-15,27,38-39,41H,8-9,16H2,1-4H3,(H,36,37)/t27-/m0/s1	(S)-8-chloro-6-(((2-methyl-2H-indazol-4- yl)(1-(1-(trifluoromethyl)cyclopropyl)-1H- 1,2,3-triazol-4-yl)methyl)amino)-4- (neopentylamino)quinoline-3-carbonitrile::US11066414, Compound 544	8	aid1805683	Gilead Sciences, Inc.	134212266
1059118	InChI=1S/C31H31ClF2N8/c1-30(2,3)17-38-26-19(13-35)14-37-27-22(26)11-20(12-24(27)32)39-28(21-6-4-5-18-7-10-36-15-23(18)21)25-16-42(41-40-25)31(8-9-31)29(33)34/h4-7,10-12,14-16,28-29,39-41H,8-9,17H2,1-3H3,(H,37,38)/t28-/m0/s1	(S)-8-chloro-6-(((1-(1-(difluoromethyl)- cyclopropyl)-1H-1,2,3-triazol-4- yl)(isoquinolin-8-yl)methyl)amino)-4- (neopentylamino)quinoline-3-carbonitrile::US11066414, Compound 537	2	aid1805683	Gilead Sciences, Inc.	134212264
1059117	InChI=1S/C31H31ClF2N8/c1-30(2,3)17-38-26-19(13-35)15-37-27-23(26)11-20(12-24(27)32)39-28(22-6-4-5-18-14-36-10-7-21(18)22)25-16-42(41-40-25)31(8-9-31)29(33)34/h4-7,10-12,14-16,28-29,39-41H,8-9,17H2,1-3H3,(H,37,38)/t28-/m0/s1	(S)-8-chloro-6-(((1-(1-(difluoromethyl)- cyclopropyl)-1H-1,2,3-triazol-4- yl)(isoquinolin-5-yl)methyl)amino)-4- (neopentylamino)quinoline-3-carbonitrile::US11066414, Compound 536	3	aid1805683	Gilead Sciences, Inc.	134212263
1059114	InChI=1S/C31H30ClF3N8/c1-29(2,3)17-39-26-19(13-36)14-38-27-22(26)11-20(12-24(27)32)40-28(21-6-4-5-18-7-10-37-15-23(18)21)25-16-43(42-41-25)30(8-9-30)31(33,34)35/h4-7,10-12,14-16,28,40-42H,8-9,17H2,1-3H3,(H,38,39)/t28-/m0/s1	(S)-8-chloro-6-((isoquinolin-8-yl(1-(1- (trifluoromethyl)cyclopropyl)-1H-1,2,3- triazol-4-yl)methyl)amino)-4-(neopentyl- amino)quinoline-3-carbonitrile::US11066414, Compound 533	3	aid1805683	Gilead Sciences, Inc.	134212262
1059113	InChI=1S/C26H28ClF3N8/c1-14-17(5-6-22(30)34-14)25(20-11-38(37-36-20)12-21(28)29)35-16-7-18-23(33-13-26(2,3)4)15(9-31)10-32-24(18)19(27)8-16/h5-8,10-11,21,25,35-37H,12-13H2,1-4H3,(H,32,33)/t25-/m0/s1	(S)-8-chloro-6-(((1-(2,2-difluoroethyl)-1H- 1,2,3-triazol-4-yl)(6-fluoro-2-methyl- pyridin-3-yl)methyl)amino)-4-(neopentyl- amino)quinoline-3-carbonitrile::US11066414, Compound 532	3	aid1805683	Gilead Sciences, Inc.	134212261
1059110	InChI=1S/C31H34N10/c1-30(2,3)18-35-28-20(14-33)15-34-27-19(13-32)11-21(12-23(27)28)37-29(25-17-41(39-38-25)31(4)9-10-31)22-7-6-8-26-24(22)16-36-40(26)5/h6-8,11-12,15-17,29,37-39H,9-10,18H2,1-5H3,(H,34,35)/t29-/m0/s1	(S)-6-(((1-methyl-1H-indazol-4-yl)(1-(1- methylcyclopropyl)-1H-1,2,3-triazol-4- yl)methyl)amino)-4-(neopentylamino)- quinoline-3,8-dicarbonitrile::US11066414, Compound 529	2	aid1805683	Gilead Sciences, Inc.	134212260
1059109		(S)-6-(((3-methyl-1H-indazol-4- yl)(1-(1-(trifluoro- methyl)cyclopropyl)- 1H-1,2,3-triazol-4- yl)methyl)amino)-4- (neopentylamino)quinoline- 3,8-dicarbonitrile::US11066414, Compound 528	3	aid1805683	Gilead Sciences, Inc.	134212259
1059107	InChI=1S/C31H31F3N10/c1-29(2,3)17-38-26-20(13-36)14-37-25-19(12-35)10-21(11-23(25)26)40-27(22-7-5-6-18-15-39-43(4)28(18)22)24-16-44(42-41-24)30(8-9-30)31(32,33)34/h5-7,10-11,14-16,27,40-42H,8-9,17H2,1-4H3,(H,37,38)/t27-/m0/s1	(S)-6-(((1-methyl-1H-indazol-7-yl)(1-(1- (trifluoromethyl)cyclopropyl)-1H-1,2,3- triazol-4-yl)methyl)amino)-4- (neopentylamino)quinoline-3,8- dicarbonitrile::US11066414, Compound 526	5	aid1805683	Gilead Sciences, Inc.	134212258
1059103	InChI=1S/C29H32ClF3N10/c1-27(2,3)15-36-23-16(12-34)13-35-24-19(23)10-17(11-20(24)30)37-25(18-6-5-7-21-26(18)42(4)40-38-21)22-14-43(41-39-22)28(8-9-28)29(31,32)33/h5-7,10-11,13-14,25,37-41H,8-9,15H2,1-4H3,(H,35,36)/t25-/m0/s1	(S)-8-chloro-6-(((1-methyl-1H-benzo[d] [1,2,3]triazol-7-yl)(1-(1-(trifluoromethyl)- cyclopropyl)-1H-1,2,3-triazol-4- yl)methyl)amino)-4-(neopentylamino)- quinoline-3-carbonitrile::US11066414, Compound 522	5	aid1805683	Gilead Sciences, Inc.	134212257
1059106	InChI=1S/C30H34ClN9/c1-29(2,3)17-34-26-18(13-32)14-33-27-21(26)11-19(12-23(27)31)36-28(24-16-40(38-37-24)30(4)9-10-30)20-7-6-8-25-22(20)15-35-39(25)5/h6-8,11-12,14-16,28,36-38H,9-10,17H2,1-5H3,(H,33,34)/t28-/m0/s1	(S)-8-chloro-6-(((1-methyl-1H-indazol-4- yl)(1-(1-methylcyclopropyl)-1H-1,2,3- triazol-4-yl)methyl)amino)-4- (neopentylamino)quinoline-3-carbonitrile::US11066414, Compound 525	4	aid1805683	Gilead Sciences, Inc.	134212256
1059102	InChI=1S/C30H31ClF3N9/c1-28(2,3)16-37-24-18(12-35)13-36-25-21(24)10-19(11-22(25)31)39-26(20-7-5-6-17-14-38-42(4)27(17)20)23-15-43(41-40-23)29(8-9-29)30(32,33)34/h5-7,10-11,13-15,26,39-41H,8-9,16H2,1-4H3,(H,36,37)/t26-/m0/s1	(S)-8-chloro-6-(((1-methyl-1H- indazol-7-yl)(1-(1-(trifluoromethyl)- cyclopropyl)-1H-1,2,3-triazol-4- yl)methyl)amino)-4-(neopentylamino)- quinoline-3-carbonitrile::US11066414, Compound 521	27	aid1805683	Gilead Sciences, Inc.	134212255
1059100	InChI=1S/C29H32ClN9/c1-29(2,3)16-34-25-17(13-31)14-33-26-22(25)11-18(12-23(26)30)35-27(24-15-39(37-36-24)19-5-6-19)20-7-9-32-28-21(20)8-10-38(28)4/h7-12,14-15,19,27,35-37H,5-6,16H2,1-4H3,(H,33,34)/t27-/m0/s1	(S)-8-chloro-6-(((1-cyclopropyl-1H-1,2,3- triazol-4-yl)(1-methyl-1H-pyrrolo[2,3- b]pyridin-4-yl)methyl)amino)-4- (neopentylamino)quinoline-3-carbonitrile::US11066414, Compound 519	3	aid1805683	Gilead Sciences, Inc.	134212254
1059093	InChI=1S/C29H29ClF3N9/c1-16-19(4-5-23(31)38-16)26(22-14-42(41-40-22)29(6-7-29)27(32)33)39-18-10-20-24(37-15-28(2,3)8-9-34)17(12-35)13-36-25(20)21(30)11-18/h4-5,10-11,13-14,26-27,39-41H,6-8,15H2,1-3H3,(H,36,37)/t26-/m0/s1	(S)-8-chloro-4-((3-cyano-2,2-dimethyl- propyl)amino)-6-(((1-(1-(difluoromethyl)- cyclopropyl)-1H-1,2,3-triazol-4-yl)(6-fluoro- 2-methylpyridin-3- yl)methyl)amino)quinoline- 3-carbonitrile::US11066414, Compound 512	10	aid1805683	Gilead Sciences, Inc.	134212252
1059097	InChI=1S/C29H30ClF3N8O/c1-15-18(4-5-23(31)36-15)26(21-14-41(40-39-21)29(7-8-29)27(32)33)37-17-10-19-24(38-22-6-9-42-28(22,2)3)16(12-34)13-35-25(19)20(30)11-17/h4-5,10-11,13-14,22,26-27,37,39-40H,6-9H2,1-3H3,(H,35,38)/t22?,26-/m0/s1	8-chloro-6-(((S)-(1-(1-(difluoromethyl)- cyclopropyl)-1H-1,2,3-triazol-4-yl)(6-fluoro- 2-methylpyridin-3-yl)methyl)amino)-4-((2,2- dimethyltetrahydrofuran-3-yl)amino)- quinoline-3-carbonitrile::US11066414, Compound 511::US11066414, Compound 516	2	aid1805683	Gilead Sciences, Inc.	134212250
1059087	InChI=1S/C27H29ClF2N8/c1-26(2,3)15-34-22-17(11-31)13-33-24-19(22)9-18(10-20(24)28)35-23(16-5-4-8-32-12-16)21-14-38(37-36-21)27(6-7-27)25(29)30/h4-5,8-10,12-14,23,25,35-37H,6-7,15H2,1-3H3,(H,33,34)/t23-/m0/s1	(S)-8-chloro-6-(((1-(1-(difluoromethyl)- cyclopropyl)-1H-1,2,3-triazol-4- yl)(pyridin-3-yl)methyl)amino)-4- (neopentylamino)quinoline-3-carbonitrile::US11066414, Compound 506	8	aid1805683	Gilead Sciences, Inc.	134212247
1059078	InChI=1S/C30H32ClF2N9/c1-29(2,3)16-36-25-17(12-34)13-35-26-20(25)10-18(11-22(26)31)37-27(19-6-5-7-23-21(19)14-41(4)39-23)24-15-42(40-38-24)30(8-9-30)28(32)33/h5-7,10-11,13-15,27-28,37-38,40H,8-9,16H2,1-4H3,(H,35,36)/t27-/m0/s1	(S)-8-chloro-6-(((1-(1-(difluoromethyl)- cyclopropyl)-1H-1,2,3-triazol-4-yl)(2- methyl-2H-indazol-4-yl)methyl)amino)-4- (neopentylamino)quinoline-3-carbonitrile::US11066414, Compound 497	6	aid1805683	Gilead Sciences, Inc.	134212245
1059080	InChI=1S/C30H32ClF2N9/c1-29(2,3)15-36-24-17(12-34)13-35-25-20(24)10-18(11-21(25)31)38-26(19-6-5-7-22-27(19)41(4)16-37-22)23-14-42(40-39-23)30(8-9-30)28(32)33/h5-7,10-11,13-14,16,26,28,38-40H,8-9,15H2,1-4H3,(H,35,36)/t26-/m0/s1	(S)-8-chloro-6-(((1-(1-(difluoromethyl)- cyclopropyl)-1H-1,2,3-triazol-4-yl)(1- methyl-1H-benzo[d]imidazol-7- yl)methyl)amino)-4-(neopentylamino)- quinoline-3-carbonitrile::US11066414, Compound 499	3	aid1805683	Gilead Sciences, Inc.	134212244
1059075	InChI=1S/C30H33FN10O/c1-17-21(6-7-24(31)37-17)27(23-15-41(40-39-23)30(28(34)42)8-5-9-30)38-20-10-18(12-32)25-22(11-20)26(19(13-33)14-35-25)36-16-29(2,3)4/h6-7,10-11,14-15,27,38-40H,5,8-9,16H2,1-4H3,(H2,34,42)(H,35,36)/t27-/m0/s1	(S)-1-(4-(((3,8-dicyano-4-(neopentyl- amino)quinolin-6-yl)amino)(6-fluoro-2- methylpyridin-3-yl)methyl)-1H-1,2,3- triazol-1-yl)cyclobutane-1-carboxamide::US11066414, Compound 494	1	aid1805683	Gilead Sciences, Inc.	134212243
1059074	InChI=1S/C28H28ClF3N10/c1-26(2,3)15-35-23-16(11-33)12-34-24-18(23)9-17(10-20(24)29)38-25(19-13-37-42-22(19)5-4-8-36-42)21-14-41(40-39-21)27(6-7-27)28(30,31)32/h4-5,8-10,12-14,25,38-40H,6-7,15H2,1-3H3,(H,34,35)/t25-/m0/s1	(S)-8-chloro-4-(neopentylamino)-6- ((pyrazolo[1,5-b]pyridazin-3-yl(1-(1- (trifluoromethyl)cyclopropyl)-1H-1,2,3- triazol-4-yl)methyl)amino)quinoline-3- carbonitrile::US11066414, Compound 493	31	aid1805683	Gilead Sciences, Inc.	134212242
1059073	InChI=1S/C29H32FN9/c1-17-21(6-7-24(30)35-17)27(23-15-39(38-37-23)29(5)8-9-29)36-20-10-18(12-31)25-22(11-20)26(19(13-32)14-33-25)34-16-28(2,3)4/h6-7,10-11,14-15,27,36-38H,8-9,16H2,1-5H3,(H,33,34)/t27-/m0/s1	(S)-6-(((6-fluoro-2-methylpyridin-3-yl)(1- (1-methylcyclopropyl)-1H-1,2,3-triazol-4- yl)methyl)amino)-4-(neopentylamino)- quinoline-3,8-dicarbonitrile::US11066414, Compound 492	2	aid1805683	Gilead Sciences, Inc.	134212241
1059068	InChI=1S/C29H33F2N9O/c1-16-19(6-7-23(31)36-16)26(22-14-40(39-38-22)29(27(33)41)8-5-9-29)37-18-10-20-24(35-15-28(2,3)4)17(12-32)13-34-25(20)21(30)11-18/h6-7,10-11,13-14,26,37-39H,5,8-9,15H2,1-4H3,(H2,33,41)(H,34,35)/t26-/m0/s1	(S)-1-(4-(((3-cyano-8-fluoro-4-(neopentyl- amino)quinolin-6-yl)amino)(6-fluoro-2- methylpyridin-3-yl)methyl)- 1H-1,2,3-triazol- 1-yl)cyclobutane-1-carboxamide::US11066414, Compound 487	1	aid1805683	Gilead Sciences, Inc.	134212240
1059061	InChI=1S/C28H32ClFN8/c1-16-19(6-7-23(30)34-16)26(22-14-38(37-36-22)28(5)8-9-28)35-18-10-20-24(33-15-27(2,3)4)17(12-31)13-32-25(20)21(29)11-18/h6-7,10-11,13-14,26,35-37H,8-9,15H2,1-5H3,(H,32,33)/t26-/m0/s1	(S)-8-chloro-6-(((6-fluoro-2-methylpyridin- 3-yl)(1-(1-methylcyclopropyl)-1H-1,2,3- triazol-4-yl)methyl)amino)-4- (neopentylamino)- quinoline-3-carbonitrile::US11066414, Compound 480	2	aid1805683	Gilead Sciences, Inc.	134212239
1059060	InChI=1S/C29H31ClFN9/c1-17-20(6-7-24(31)36-17)27(23-14-40(39-38-23)29(15-33)8-5-9-29)37-19-10-21-25(35-16-28(2,3)4)18(12-32)13-34-26(21)22(30)11-19/h6-7,10-11,13-14,27,37-39H,5,8-9,16H2,1-4H3,(H,34,35)/t27-/m0/s1	(S)-8-chloro-6-(((1-(1-cyanocyclobutyl)- 1H-1,2,3-triazol-4-yl)(6-fluoro-2- methylpyridin-3-yl)methyl)amino)-4- (neopentylamino)quinoline-3- carbonitrile::US11066414, Compound 479	5	aid1805683	Gilead Sciences, Inc.	134212238
1059059	InChI=1S/C29H33ClFN9O/c1-16-19(6-7-23(31)36-16)26(22-14-40(39-38-22)29(27(33)41)8-5-9-29)37-18-10-20-24(35-15-28(2,3)4)17(12-32)13-34-25(20)21(30)11-18/h6-7,10-11,13-14,26,37-39H,5,8-9,15H2,1-4H3,(H2,33,41)(H,34,35)/t26-/m0/s1	(S)-1-(4-(((8-chloro-3-cyano-4- (neopentylamino)quinolin-6-yl)amino)(6- fluoro-2-methylpyridin-3-yl)methyl)-1H- 1,2,3-triazol-1-yl)cyclobutane-1- carboxamide::US11066414, Compound 478	1	aid1805683	Gilead Sciences, Inc.	134212237
1059055	InChI=1S/C32H30F3N9OS/c1-30(2)16-45-9-6-25(30)41-27-19(13-37)14-38-26-18(12-36)10-20(11-22(26)27)40-28(21-4-3-5-23-29(21)46-17-39-23)24-15-44(43-42-24)31(7-8-31)32(33,34)35/h3-5,10-11,14-15,17,25,28,40,42-43H,6-9,16H2,1-2H3,(H,38,41)/t25-,28+/m1/s1	6-(((S)-benzo[d]thiazol-7-yl(1-(1- (trifluoromethyl)cyclopropyl)-1H-1,2,3- triazol-4-yl)methyl)amino)-4-(((R)-3,3- dimethyltetrahydro-2H-pyran-4- yl)amino)quinoline-3,8-dicarbonitrile::US11066414, Compound 474	2	aid1805683	Gilead Sciences, Inc.	134212236
1059051	InChI=1S/C32H30F3N9/c1-30(2,3)18-40-28-21(14-37)16-39-27-20(13-36)11-22(12-25(27)28)41-29(24-6-4-5-19-15-38-10-7-23(19)24)26-17-44(43-42-26)31(8-9-31)32(33,34)35/h4-7,10-12,15-17,29,41-43H,8-9,18H2,1-3H3,(H,39,40)/t29-/m0/s1	(S)-6-((isoquinolin-5-yl(1-(1- (trifluoromethyl)cyclopropyl)-1H-1,2,3- triazol-4-yl)methyl)amino)-4- (neopentylamino)quinoline-3,8- dicarbonitrile::US11066414, Compound 470	2	aid1805683	Gilead Sciences, Inc.	134212235
1059048	InChI=1S/C31H31N9/c1-31(2,3)18-36-29-20(15-33)16-35-28-19(14-32)12-21(13-25(28)29)37-30(27-17-40(39-38-27)22-9-10-22)24-6-4-8-26-23(24)7-5-11-34-26/h4-8,11-13,16-17,22,30,37-39H,9-10,18H2,1-3H3,(H,35,36)/t30-/m0/s1	(S)-6-(((1-cyclopropyl-1H-1,2,3-triazol-4- yl)(quinolin-5-yl)methyl)amino)-4- (neopentylamino)quinoline-3,8- dicarbonitrile::US11066414, Compound 467	2	aid1805683	Gilead Sciences, Inc.	134212234
1059047	InChI=1S/C29H30ClN9/c1-29(2,3)16-35-26-17(10-31)13-34-27-22(26)8-19(9-24(27)30)36-28(25-15-39(38-37-25)20-4-5-20)23-14-33-12-18-11-32-7-6-21(18)23/h6-9,11-15,20,28,36-38H,4-5,16H2,1-3H3,(H,34,35)/t28-/m0/s1	(S)-8-chloro-6-(((1-cyclopropyl-1H- 1,2,3-triazol-4-yl)(2,7-naphthyridin-4- yl)methyl)amino)-4-(neopentylamino)- quinoline-3-carbonitrile::US11066414, Compound 466	28	aid1805683	Gilead Sciences, Inc.	134212233
1059045	InChI=1S/C34H32N10S/c1-33(2,3)19-39-30-22(16-36)17-38-29-21(15-35)13-24(14-26(29)30)41-31(25-5-4-6-27-32(25)45-20-40-27)28-18-44(43-42-28)34(9-10-34)23-7-11-37-12-8-23/h4-8,11-14,17-18,20,31,41-43H,9-10,19H2,1-3H3,(H,38,39)/t31-/m0/s1	(S)-6-((benzo[d]thiazol-7- yl(1-(1-(pyridin-4- yl)cyclopropyl)-1H-1,2,3-triazol-4- yl)methyl)amino)-4-(neopentylamino)- quinoline-3,8-dicarbonitrile::US11066414, Compound 464	1	aid1805683	Gilead Sciences, Inc.	134212232
1059040	InChI=1S/C29H32ClN9/c1-29(2,3)15-33-25-17(12-31)13-32-26-21(25)10-18(11-22(26)30)35-27(24-14-39(37-36-24)19-8-9-19)20-6-5-7-23-28(20)38(4)16-34-23/h5-7,10-11,13-14,16,19,27,35-37H,8-9,15H2,1-4H3,(H,32,33)/t27-/m0/s1	(S)-8-chloro-6-(((1-cyclopropyl-1H- 1,2,3-triazol-4-yl)(1-methyl-1H- benzo[d]imidazol-7-yl)methyl)amino)- 4-(neopentylamino)quinoline-3- carbonitrile::US11066414, Compound 459	3	aid1805683	Gilead Sciences, Inc.	134212231
1059039	InChI=1S/C29H31ClN8OS/c1-28(2,3)14-33-24-17(11-31)12-32-25-20(24)9-18(10-21(25)30)35-26(19-5-4-6-22-27(19)40-16-34-22)23-13-38(37-36-23)29(15-39)7-8-29/h4-6,9-10,12-13,16,26,35-37,39H,7-8,14-15H2,1-3H3,(H,32,33)/t26-/m0/s1	(S)-6-((benzo[d]thiazol-7-yl(1-(1- (hydroxymethyl)cyclopropyl)-1H- 1,2,3-triazol-4-yl)methyl)amino)-8- chloro-4-(neopentylamino)quinoline- 3-carbonitrile::US11066414, Compound 458	4	aid1805683	Gilead Sciences, Inc.	134212230
1059037	InChI=1S/C28H27N9OS/c1-28(2,3)38-35-25-17(12-30)13-31-24-16(11-29)9-18(10-21(24)25)33-26(23-14-37(36-34-23)19-7-8-19)20-5-4-6-22-27(20)39-15-32-22/h4-6,9-10,13-15,19,26,33-34,36H,7-8H2,1-3H3,(H,31,35)/t26-/m0/s1	(S)-6-((benzo[d]thiazol-7-yl(1- cyclopropyl-1H-1,2,3-triazol-4- yl)methyl)amino)-4-(tert- butoxyamino)quinoline-3,8- dicarbonitrile::US11066414, Compound 456	51	aid1805683	Gilead Sciences, Inc.	134212229
1059036	InChI=1S/C29H28F4N8S/c1-27(2,3)14-36-23-16(11-34)12-35-24-19(23)9-17(10-20(24)30)38-25(18-5-4-6-21-26(18)42-15-37-21)22-13-41(40-39-22)28(7-8-28)29(31,32)33/h4-6,9-10,12-13,15,25,38-40H,7-8,14H2,1-3H3,(H,35,36)/t25-/m0/s1	(S)-6-((benzo[d]thiazol-7-yl(1-(1- (trifluoromethyl)cyclopropyl)-1H- 1,2,3-triazol-4-yl)methyl)amino)-8- fluoro-4-(neopentylamino)quinoline-3- carbonitrile::US11066414, Compound 455	29	aid1805683	Gilead Sciences, Inc.	134212228
1059035	InChI=1S/C28H30FN9/c1-16-21(7-8-24(29)34-16)27(23-14-38(37-36-23)20-5-6-20)35-19-9-17(11-30)25-22(10-19)26(18(12-31)13-32-25)33-15-28(2,3)4/h7-10,13-14,20,27,35-37H,5-6,15H2,1-4H3,(H,32,33)/t27-/m0/s1	(S)-6-(((1-cyclopropyl-1H-1,2,3-triazol- 4-yl)(6-fluoro-2-methylpyridin-3- yl)methyl)amino)-4-(neopentylamino)- quinoline-3,8-dicarbonitrile::US11066414, Compound 454	2	aid1805683	Gilead Sciences, Inc.	134212227
1059034	InChI=1S/C31H31F3N8OS/c1-17(43)21-10-19(11-22-25(37-15-29(2,3)4)18(12-35)13-36-26(21)22)39-27(20-6-5-7-23-28(20)44-16-38-23)24-14-42(41-40-24)30(8-9-30)31(32,33)34/h5-7,10-11,13-14,16,27,39-41H,8-9,15H2,1-4H3,(H,36,37)/t27-/m0/s1	(S)-8-acetyl-6-((benzo[d]thiazol-7-yl(1- (1-(trifluoromethyl)cyclopropyl)-1H- 1,2,3-triazol-4-yl)methyl)amino)-4- (neopentylamino)quinoline-3- carbonitrile::US11066414, Compound 453	9	aid1805683	Gilead Sciences, Inc.	134212226
1059030	InChI=1S/C28H29ClN8S/c1-28(2,3)14-32-24-16(11-30)12-31-25-20(24)9-17(10-21(25)29)34-26(22-13-37(36-35-22)18-7-8-18)19-5-4-6-23-27(19)33-15-38-23/h4-6,9-10,12-13,15,18,26,34-36H,7-8,14H2,1-3H3,(H,31,32)/t26-/m0/s1	(S)-6-((benzo[d]thiazol-4-yl(1- cyclopropyl-1H-1,2,3-triazol-4- yl)methyl)amino)-8-chloro-4- (neopentylamino)quinoline-3- carbonitrile::US11066414, Compound 449	19	aid1805683	Gilead Sciences, Inc.	134212225
1059031	InChI=1S/C30H31ClN8/c1-30(2,3)17-35-27-19(14-32)15-34-28-23(27)12-20(13-24(28)31)36-29(25-16-39(38-37-25)21-9-10-21)22-8-4-6-18-7-5-11-33-26(18)22/h4-8,11-13,15-16,21,29,36-38H,9-10,17H2,1-3H3,(H,34,35)/t29-/m0/s1	(S)-8-chloro-6-(((1-cyclopropyl-1H-1,2,3- triazol-4-yl)(quinolin-8-yl)methyl)amino)- 4-(neopentylamino)quinoline-3- carbonitrile::US11066414, Compound 450	20	aid1805683	Gilead Sciences, Inc.	134212224
1059029		(S)-8-chloro-6-(((1-cyclopropyl-1H-1,2,3- triazol-4-yl)(1H-indazol-4-yl)methyl)- amino)-4-(neopentylamino)quinoline-3- carbonitrile::US11066414, Compound 448	2	aid1805683	Gilead Sciences, Inc.	134212223
1059027	InChI=1S/C28H30ClN9/c1-28(2,3)15-33-25-17(11-30)12-32-26-21(25)9-18(10-22(26)29)34-27(23-14-38(36-35-23)19-6-7-19)20-5-4-8-37-16-31-13-24(20)37/h4-5,8-10,12-14,16,19,27,34-36H,6-7,15H2,1-3H3,(H,32,33)/t27-/m0/s1	(S)-8-chloro-6-(((1-cyclopropyl-1H- 1,2,3-triazol-4-yl)(imidazo[1,5-a]pyridin- 8-yl)methyl)amino)-4-(neopentylamino)- quinoline-3-carbonitrile::US11066414, Compound 446	3	aid1805683	Gilead Sciences, Inc.	134212222
1059021	InChI=1S/C32H29ClF4N8/c1-3-25(19-7-5-4-6-8-19)42-28-20(15-38)16-39-29-23(28)13-21(14-24(29)33)41-30(22-9-10-27(34)40-18(22)2)26-17-45(44-43-26)31(11-12-31)32(35,36)37/h4-10,13-14,16-17,25,30,41,43-44H,3,11-12H2,1-2H3,(H,39,42)/t25-,30+/m1/s1	8-chloro-6-(((S)-(6-fluoro-2-methyl- pyridin-3-yl)(1-(1-(trifluoromethyl)- cyclopropyl)-1H-1,2,3-triazol-4- yl)methyl)amino)-4-(((R)-1-phenyl- propyl)amino)quinoline-3-carbonitrile::US11066414, Compound 440	7	aid1805683	Gilead Sciences, Inc.	134212221
1059020	InChI=1S/C29H28BrF3N8S/c1-27(2,3)14-36-23-16(11-34)12-35-24-19(23)9-17(10-20(24)30)38-25(18-5-4-6-21-26(18)42-15-37-21)22-13-41(40-39-22)28(7-8-28)29(31,32)33/h4-6,9-10,12-13,15,25,38-40H,7-8,14H2,1-3H3,(H,35,36)/t25-/m0/s1	(S)-6-((benzo[d]thiazol-7-yl(1-(1- (trifluoromethyl)cyclopropyl)-1H- 1,2,3-triazol-4-yl)methyl)amino)-8- bromo-4-(neopentylamino)quinoline- 3-carbonitrile::US11066414, Compound 439	13	aid1805683	Gilead Sciences, Inc.	134212220
1059018	InChI=1S/C30H31ClN8/c1-30(2,3)17-35-27-18(14-32)15-34-28-23(27)12-19(13-24(28)31)36-29(26-16-39(38-37-26)20-9-10-20)22-6-4-8-25-21(22)7-5-11-33-25/h4-8,11-13,15-16,20,29,36-38H,9-10,17H2,1-3H3,(H,34,35)/t29-/m0/s1	(S)-8-chloro-6-(((1- cyclopropyl-1H-1,2,3- triazol-4-yl)(quinolin-5- yl)methyl)amino)- 4-(neopentylamino)quinoline- 3-carbonitrile::US11066414, Compound 437	2	aid1805683	Gilead Sciences, Inc.	134212218
1059017	InChI=1S/C26H27Cl2FN8/c1-26(2,3)13-32-22-14(10-30)11-31-23-18(22)8-15(9-19(23)27)33-24(17-6-7-21(29)34-25(17)28)20-12-37(36-35-20)16-4-5-16/h6-9,11-12,16,24,33,35-36H,4-5,13H2,1-3H3,(H,31,32)/t24-/m0/s1	(S)-8-chloro-6-(((2-chloro-6-fluoro- pyridin-3-yl)(1-cyclopropyl-1H-1,2,3- triazol-4-yl)methyl)amino)-4-(neo- pentylamino)quinoline-3-carbonitrile::US11066414, Compound 436	5	aid1805683	Gilead Sciences, Inc.	134212217
1059008	InChI=1S/C30H31N9S/c1-17-35-24-7-5-6-22(29(24)40-17)28(25-15-39(38-37-25)21-8-9-21)36-20-10-18(12-31)26-23(11-20)27(19(13-32)14-33-26)34-16-30(2,3)4/h5-7,10-11,14-15,21,28,36-38H,8-9,16H2,1-4H3,(H,33,34)/t28-/m0/s1	(S)-6-(((1-cyclopropyl-1H-1,2,3-triazol-4- yl)(2-methylbenzo[d]thiazol-7- yl)methyl)amino)-4-(neopentylamino)- quinoline-3,8-dicarbonitrile::US11066414, Compound 427	2	aid1805683	Gilead Sciences, Inc.	134212214
1059004	InChI=1S/C29H32ClN9/c1-29(2,3)16-33-26-17(12-31)13-32-27-21(26)10-18(11-23(27)30)35-28(24-15-39(37-36-24)19-8-9-19)20-6-5-7-25-22(20)14-34-38(25)4/h5-7,10-11,13-15,19,28,35-37H,8-9,16H2,1-4H3,(H,32,33)/t28-/m0/s1	(S)-8-chloro-6-(((1-cyclopropyl-1H- 1,2,3-triazol-4-yl)(1-methyl-1H-indazol- 4-yl)methyl)amino)-4-(neopentylamino)- quinoline-3-carbonitrile::US11066414, Compound 423	3	aid1805683	Gilead Sciences, Inc.	134212212
1058999	InChI=1S/C28H29ClN8S/c1-28(2,3)14-32-24-16(11-30)12-31-25-20(24)9-17(10-21(25)29)34-26(23-13-37(36-35-23)18-7-8-18)19-5-4-6-22-27(19)38-15-33-22/h4-6,9-10,12-13,15,18,26,34-36H,7-8,14H2,1-3H3,(H,31,32)/t26-/m0/s1	(S)-6-((benzo[d]thiazol-7-yl(1- cyclopropyl-1H-1,2,3-triazol-4- yl)methyl)amino)-8-chloro-4- (neopentylamino)quinoline-3- carbonitrile::US11066414, Compound 418	2	aid1805683	Gilead Sciences, Inc.	134212210
1058993	InChI=1S/C34H28F3N9S/c1-2-26(20-7-4-3-5-8-20)43-30-22(16-39)17-40-29-21(15-38)13-23(14-25(29)30)42-31(24-9-6-10-27-32(24)47-19-41-27)28-18-46(45-44-28)33(11-12-33)34(35,36)37/h3-10,13-14,17-19,26,31,42,44-45H,2,11-12H2,1H3,(H,40,43)/t26-,31+/m1/s1	6-(((S)-benzo[d]thiazol-7-yl(1-(1- (trifluoromethyl)- cyclopropyl)-1H-1,2,3- triazol-4-yl)methyl)amino)-4-(((R)-1- phenylpropyl)amino)quinoline-3,8- dicarbonitrile::US11066414, Compound 412	7	aid1805683	Gilead Sciences, Inc.	134212208
1058992	InChI=1S/C33H29N9S/c1-2-27(20-7-4-3-5-8-20)39-31-22(16-35)17-36-30-21(15-34)13-23(14-26(30)31)38-32(29-18-42(41-40-29)24-11-12-24)25-9-6-10-28-33(25)43-19-37-28/h3-10,13-14,17-19,24,27,32,38,40-41H,2,11-12H2,1H3,(H,36,39)/t27-,32+/m1/s1	6-(((S)-benzo[d]thiazol-7-yl(1- cyclopropyl-1H-1,2,3-triazol-4- yl)methyl)amino)-4-(((R)-1- phenylpropyl)amino)quinoline-3,8- dicarbonitrile::US11066414, Compound 411	5	aid1805683	Gilead Sciences, Inc.	134212207
1058990	InChI=1S/C30H30N10OS/c1-29(2,3)15-35-25-18(12-32)13-34-24-17(11-31)9-19(10-21(24)25)37-26(20-5-4-6-22-27(20)42-16-36-22)23-14-40(39-38-23)30(7-8-30)28(33)41/h4-6,9-10,13-14,16,26,37-39H,7-8,15H2,1-3H3,(H2,33,41)(H,34,35)/t26-/m0/s1	(S)-1-(4-(benzo[d]thiazol-7-yl((3,8- dicyano-4-(neopentylamino)quinolin- 6-yl)amino)methyl)-1H-1,2,3-triazol- 1-yl)cyclopropane-1-carboxamide::US11066414, Compound 409	1	aid1805683	Gilead Sciences, Inc.	134212205
1058984	InChI=1S/C31H36Cl2FN11/c1-31(2,3)44-9-7-21(8-10-44)45-17-27(40-42-45)30(26-16-43(4)41-39-26)38-20-11-22-28(37-19-5-6-25(34)23(32)12-19)18(14-35)15-36-29(22)24(33)13-20/h5-6,11-13,15-17,21,30,38-42H,7-10H2,1-4H3,(H,36,37)	6-(((1-(1-(tert-butyl)piperidin-4- yl)-1H-1,2,3-triazol-4-yl)(1-methyl- 1H-l, 2,3-triazol-4-yl)methyl)amino)- 8-chloro-4-((3-chloro-4-fluorophenyl)- amino)quinoline-3-carbonitrile::US11066414, Compound 399	58	aid1805683	Gilead Sciences, Inc.	134212201
1058978	InChI=1S/C30H29Cl2FN8S/c1-2-40-8-5-22(6-9-40)41-16-27(38-39-41)29(18-7-10-42-17-18)37-21-11-23-28(36-20-3-4-26(33)24(31)12-20)19(14-34)15-35-30(23)25(32)13-21/h3-4,7,10-13,15-17,22,29,37-39H,2,5-6,8-9H2,1H3,(H,35,36)/t29-/m0/s1	(S)-8-chloro-4-((3-chloro-4-fluoro- phenyl)amino)-6-(((1-(1-ethylpiperidin-4- yl)-1H-1,2,3-triazol-4-yl)(thiophen-3- yl)methyl)amino)quinoline-3- carbonitrile::US11066414, Compound 392	3	aid1805683	Gilead Sciences, Inc.	134212198
1058973	InChI=1S/C28H24Cl3FN8S/c29-20-10-16(1-2-22(20)32)36-26-15(12-33)13-35-27-19(26)9-17(11-21(27)30)37-28(24-3-4-25(31)41-24)23-14-40(39-38-23)18-5-7-34-8-6-18/h1-4,9-11,13-14,18,28,34,37-39H,5-8H2,(H,35,36)/t28-/m1/s1	(R)-8-chloro-4-((3-chloro-4-fluoro- phenyl)amino)-6-(((5-chlorothiophen-2- yl)(1-(piperidin-4-yl)-1H-1,2,3-triazol-4- yl)methyl)amino)quinoline-3- carbonitrile::US11066414, Compound 386	36	aid1805683	Gilead Sciences, Inc.	134212196
1058972	InChI=1S/C28H24Cl3FN8S/c29-16-7-25(41-14-16)28(24-13-40(39-38-24)19-3-5-34-6-4-19)37-18-8-20-26(36-17-1-2-23(32)21(30)9-17)15(11-33)12-35-27(20)22(31)10-18/h1-2,7-10,12-14,19,28,34,37-39H,3-6H2,(H,35,36)/t28-/m1/s1	(R)-8-chloro-4-((3-chloro-4-fluoro- phenyl)amino)-6-(((4-chlorothiophen-2- yl)(1-(piperidin-4-yl)-1H-1,2,3-triazol-4- yl)methyl)amino)quinoline-3-carbonitrile::US11066414, Compound 385	14	aid1805683	Gilead Sciences, Inc.	134212195
1058947	InChI=1S/C30H29Cl2FN8S/c1-2-40-9-7-21(8-10-40)41-17-26(38-39-41)30(27-4-3-11-42-27)37-20-12-22-28(36-19-5-6-25(33)23(31)13-19)18(15-34)16-35-29(22)24(32)14-20/h3-6,11-14,16-17,21,30,37-39H,2,7-10H2,1H3,(H,35,36)/t30-/m1/s1	(R)-8-chloro-4-((3-chloro-4-fluoro- phenyl)amino)-6-(((1-(1-ethylpiperidin- 4-yl)-1H-1,2,3-triazol-4-yl)(thiophen- 2-yl)methyl)amino)quinoline-3- carbonitrile::US11066414, Compound 380	14	aid1805683	Gilead Sciences, Inc.	134212193
1058946	InChI=1S/C31H29Cl3FN9/c1-2-43-9-7-22(8-10-43)44-17-27(41-42-44)30(18-3-6-28(34)37-15-18)40-21-11-23-29(39-20-4-5-26(35)24(32)12-20)19(14-36)16-38-31(23)25(33)13-21/h3-6,11-13,15-17,22,30,40-42H,2,7-10H2,1H3,(H,38,39)/t30-/m0/s1	(S)-8-chloro-4-((3-chloro-4-fluoro- phenyl)amino)-6-(((6-chloropyridin- 3-yl)(1-(1-ethylpiperidin-4-yl)-1H-1,2,3- triazol-4-yl)methyl)amino)quinoline-3- carbonitrile::US11066414, Compound 379	6	aid1805683	Gilead Sciences, Inc.	134212192
1058940	InChI=1S/C30H30Cl2FN9S/c1-2-7-41-8-5-21(6-9-41)42-16-26(39-40-42)30(27-15-35-17-43-27)38-20-10-22-28(37-19-3-4-25(33)23(31)11-19)18(13-34)14-36-29(22)24(32)12-20/h3-4,10-12,14-17,21,30,38-40H,2,5-9H2,1H3,(H,36,37)/t30-/m1/s1	(R)-8-chloro-4-((3-chloro-4- fluorophenyl)amino)-6-(((1-(1- propylpiperidin-4-yl)-1H-1,2,3-triazol- 4-yl)(thiazol-5-yl)methyl)amino)- quinoline-3-carbonitrile::US11066414, Compound 373	3	aid1805683	Gilead Sciences, Inc.	134212191
1058945	InChI=1S/C29H28Cl2FN9S/c1-2-40-7-5-20(6-8-40)41-15-25(38-39-41)29(26-14-34-16-42-26)37-19-9-21-27(36-18-3-4-24(32)22(30)10-18)17(12-33)13-35-28(21)23(31)11-19/h3-4,9-11,13-16,20,29,37-39H,2,5-8H2,1H3,(H,35,36)/t29-/m1/s1	(R)-8-chloro-4-((3-chloro-4-fluoro- phenyl)amino)-6-(((1-(1-ethylpiperidin- 4-yl)-1H-1,2,3-triazol-4-yl)(thiazol-5- yl)methyl)amino)quinoline-3- carbonitrile::US11066414, Compound 378	2	aid1805683	Gilead Sciences, Inc.	134212190
1058942	InChI=1S/C27H24Cl2FN9S/c28-20-8-16(1-2-22(20)30)35-25-15(10-31)11-34-26-19(25)7-17(9-21(26)29)36-27(24-12-33-14-40-24)23-13-39(38-37-23)18-3-5-32-6-4-18/h1-2,7-9,11-14,18,27,32,36-38H,3-6H2,(H,34,35)/t27-/m1/s1	(R)-8-chloro-4-((3-chloro-4- fluorophenyl)amino)-6-(((1-(piperidin- 4-yl)-1H-1,2,3-triazol-4-yl)(thiazol-5- yl)methyl)amino)quinoline-3- carbonitrile::US11066414, Compound 375	4	aid1805683	Gilead Sciences, Inc.	134212189
1058938	InChI=1S/C30H28Cl3FN8S/c1-2-41-7-5-20(6-8-41)42-14-27(39-40-42)30(22-15-43-16-25(22)33)38-19-9-21-28(37-18-3-4-26(34)23(31)10-18)17(12-35)13-36-29(21)24(32)11-19/h3-4,9-11,13-16,20,30,38-40H,2,5-8H2,1H3,(H,36,37)/t30-/m0/s1	(S)-8-chloro-4-((3-chloro-4- fluorophenyl)amino)-6-(((4- chlorothiophen-3- yl)(1-(1-ethylpiperidin- 4-yl)-1H-1,2,3-triazol-4-yl)methyl)- amino)quinoline-3-carbonitrile::US11066414, Compound 371	2	aid1805683	Gilead Sciences, Inc.	134212188
1058941	InChI=1S/C31H32Cl2FN9S/c1-3-41-9-7-21(8-10-41)43-16-27(39-40-43)31(28-17-44-18-37-28)42(4-2)22-12-23-29(38-20-5-6-26(34)24(32)11-20)19(14-35)15-36-30(23)25(33)13-22/h5-6,11-13,15-18,21,31,39-40H,3-4,7-10H2,1-2H3,(H,36,38)/t31-/m1/s1	(S)-8-chloro-4-((3-chloro-4- fluorophenyl)amino)-6-(ethyl((1- (1-ethylpiperidin-4-yl)-1H-1,2,3- triazol-4-yl)(thiazol-4-yl)methyl)- amino)quinoline-3-carbonitrile::US11066414, Compound 374	37	aid1805683	Gilead Sciences, Inc.	134212187
1058937	InChI=1S/C31H32Cl2FN9S/c1-31(2,3)42-8-6-21(7-9-42)43-16-26(40-41-43)30(27-15-36-17-44-27)39-20-10-22-28(38-19-4-5-25(34)23(32)11-19)18(13-35)14-37-29(22)24(33)12-20/h4-5,10-12,14-17,21,30,39-41H,6-9H2,1-3H3,(H,37,38)/t30-/m1/s1	(R)-6-(((1-(Mtert-butyl)piperidin-4-yl)- 1H-1,2,3-triazol-4-yl)(thiazol-5- yl)methyl)amino)-8- chloro-4-((3-chloro- 4-fluorophenyl)amino)quinoline-3- carbonitrile::US11066414, Compound 370	8	aid1805683	Gilead Sciences, Inc.	134212186
1058933	InChI=1S/C30H29Cl2FN10/c1-2-42-7-5-22(6-8-42)43-16-27(40-41-43)29(19-13-35-17-36-14-19)39-21-9-23-28(38-20-3-4-26(33)24(31)10-20)18(12-34)15-37-30(23)25(32)11-21/h3-4,9-11,13-17,22,29,39-41H,2,5-8H2,1H3,(H,37,38)	8-chloro-4-((3-chloro-4- fluorophenyl)amino)-6-(((1-(1- ethylpiperidin-4-yl)-1H-1,2,3-triazol- 4-yl)(pyrimidin-5-yl)methyl)amino)- quinoline-3-carbonitrile::US11066414, Compound 366	5	aid1805683	Gilead Sciences, Inc.	134212184
1058970	InChI=1S/C31H28Cl2F4N8S/c1-2-44-9-7-20(8-10-44)45-16-25(42-43-45)30(26-5-6-27(46-26)31(35,36)37)41-19-11-21-28(40-18-3-4-24(34)22(32)12-18)17(14-38)15-39-29(21)23(33)13-19/h3-6,11-13,15-16,20,30,41-43H,2,7-10H2,1H3,(H,39,40)/t30-/m1/s1	(R)-8-chloro-4-((3-chloro-4- fluorophenyl)amino)-6-(((1-(1- ethylpiperidin-4-yl)-1H-1,2,3-triazol- 4-yl)(5-(trifluoromethyl)thiophen- 2-yl)methyl)amino)quinoline-3- carbonitrile::US11066414, Compound 365	38	aid1805683	Gilead Sciences, Inc.	134212183
1058932	InChI=1S/C24H16Cl2FN9S/c25-17-6-14(1-2-19(17)27)32-22-13(8-29)9-30-23-16(22)5-15(7-18(23)26)33-24(21-11-37-12-31-21)20-10-36(4-3-28)35-34-20/h1-2,5-7,9-12,24,33-35H,4H2,(H,30,32)/t24-/m1/s1	(S)-8-chloro-4-((3-chloro-4- fluorophenyl)amino)-6-(((1- (cyanomethyl)-1H-1,2,3-triazol-4- yl)(thiazol-4-yl)methyl)amino)- quinoline-3-carbonitrile::US11066414, Compound 364	7	aid1805683	Gilead Sciences, Inc.	134212182
1058931	InChI=1S/C25H19Cl2FN8OS/c26-18-4-14(1-2-20(18)28)32-23-13(6-29)7-30-24-17(23)3-15(5-19(24)27)33-25(22-11-38-12-31-22)21-8-36(35-34-21)16-9-37-10-16/h1-5,7-8,11-12,16,25,33-35H,9-10H2,(H,30,32)/t25-/m1/s1	(S)-8-chloro-4-((3-chloro-4- fluorophenyl)amino)-6-(((1-(oxetan- 3-yl)-1H-1,2,3-triazol-4-yl)(thiazol-4- yl)methyl)amino)quinoline-3- carbonitrile::US11066414, Compound 363	4	aid1805683	Gilead Sciences, Inc.	134212181
1058930	InChI=1S/C31H30Cl2FN9/c1-2-42-10-7-23(8-11-42)43-18-28(40-41-43)30(19-4-3-9-36-16-19)39-22-12-24-29(38-21-5-6-27(34)25(32)13-21)20(15-35)17-37-31(24)26(33)14-22/h3-6,9,12-14,16-18,23,30,39-41H,2,7-8,10-11H2,1H3,(H,37,38)/t30-/m0/s1	(S)-8-chloro-4-((3-chloro-4- fluorophenyl)amino)-6-(((1-(1- ethylpiperidin-4-yl)-1H-1,2,3-triazol- 4-yl)(pyridin-3-yl)methyl)amino)- quinoline-3-carbonitrile::US11066414, Compound 362	1	aid1805683	Gilead Sciences, Inc.	134212180
1058927	InChI=1S/C24H20Cl2FN9S/c25-17-6-14(1-2-19(17)27)32-22-13(8-29)9-30-23-16(22)5-15(7-18(23)26)33-24(21-11-37-12-31-21)20-10-36(4-3-28)35-34-20/h1-2,5-7,9-12,24,33-35H,3-4,28H2,(H,30,32)/t24-/m1/s1	(S)-6-(((1-(2-arninoethyl)-1H-1,2,3- triazol-4-yl)(thiazol-4-yl)methyl)- amino)-8-chloro-4-((3-chloro-4- fluorophenyl)amino)quinoline-3- carbonitrile::US11066414, Compound 359	3	aid1805683	Gilead Sciences, Inc.	134212179
1058928	InChI=1S/C27H26Cl2FN9S/c1-38(2)6-3-7-39-13-23(36-37-39)27(24-14-40-15-33-24)35-18-8-19-25(34-17-4-5-22(30)20(28)9-17)16(11-31)12-32-26(19)21(29)10-18/h4-5,8-10,12-15,27,35-37H,3,6-7H2,1-2H3,(H,32,34)/t27-/m1/s1	(S)-8-chloro-4-((3-chloro-4- fluorophenyl)amino)-6-(((1-(3- (dimethylamino)propyl)-1H-1,2,3- triazol-4-yl)(thiazol-4-yl)methyl)- amino)quinoline-3-carbonitrile::US11066414, Compound 360	4	aid1805683	Gilead Sciences, Inc.	134212178
1058926	InChI=1S/C25H21Cl2FN8OS/c1-37-5-4-36-11-21(34-35-36)25(22-12-38-13-31-22)33-16-6-17-23(32-15-2-3-20(28)18(26)7-15)14(9-29)10-30-24(17)19(27)8-16/h2-3,6-8,10-13,25,33-35H,4-5H2,1H3,(H,30,32)/t25-/m1/s1	(S)-8-chloro-4-((3-chloro-4- fluorophenyl)amino)-6-(((1-(2- methoxyethyl)-1H-1,2,3-triazol- 4-yl)(thiazol-4-yl)methyl)amino)- quinoline-3-carbonitrile::US11066414, Compound 358	3	aid1805683	Gilead Sciences, Inc.	134212177
1058969	InChI=1S/C24H19Cl2FN8OS/c25-17-6-14(1-2-19(17)27)31-22-13(8-28)9-29-23-16(22)5-15(7-18(23)26)32-24(21-11-37-12-30-21)20-10-35(3-4-36)34-33-20/h1-2,5-7,9-12,24,32-34,36H,3-4H2,(H,29,31)/t24-/m1/s1	(S)-8-chloro-4-((3-chloro-4- fluorophenyl)amino)-6-(((1-(2- hydroxyethyl)-1H-1,2,3-triazol-4- yl)(thiazol-4-yl)methyl)amino)- quinoline-3-carbonitrile::US11066414, Compound 356	2	aid1805683	Gilead Sciences, Inc.	134212176
1058924	InChI=1S/C26H24Cl2FN9S/c1-37(2)5-6-38-12-22(35-36-38)26(23-13-39-14-32-23)34-17-7-18-24(33-16-3-4-21(29)19(27)8-16)15(10-30)11-31-25(18)20(28)9-17/h3-4,7-9,11-14,26,34-36H,5-6H2,1-2H3,(H,31,33)/t26-/m1/s1	(S)-8-chloro-4-((3-chloro-4- fluorophenyl)amino)-6-(((1-(2- (dimethylamino)ethyl)-1H-1,2,3- triazol-4-yl)(thiazol-4-yl)methyl)- amino)quinoline-3-carbonitrile::US11066414, Compound 355	5	aid1805683	Gilead Sciences, Inc.	134212175
1058917	InChI=1S/C31H32Cl2FN9O/c1-31(2,3)42-8-6-21(7-9-42)43-15-26(40-41-43)30(27-16-44-17-37-27)39-20-10-22-28(38-19-4-5-25(34)23(32)11-19)18(13-35)14-36-29(22)24(33)12-20/h4-5,10-12,14-17,21,30,39-41H,6-9H2,1-3H3,(H,36,38)/t30-/m1/s1	(S)-6-(((1-(1-(tert-butyl)piperidin-4-yl)- 1H-1,2,3-triazol-4-yl)(oxazol-4- yl)methyl)amino)-8-chloro-4-((3- chloro-4-fluorophenyl)amino)- quinoline-3-carbonitrile::US11066414, Compound 348	13	aid1805683	Gilead Sciences, Inc.	134212174
1058922	InChI=1S/C31H32Cl2FN9S/c1-31(2,3)42-8-6-21(7-9-42)43-15-26(40-41-43)30(27-16-44-17-37-27)39-20-10-22-28(38-19-4-5-25(34)23(32)11-19)18(13-35)14-36-29(22)24(33)12-20/h4-5,10-12,14-17,21,30,39-41H,6-9H2,1-3H3,(H,36,38)/t30-/m1/s1	(S)-6-(((1-(1-(tert-butyl)piperidin-4-yl)- 1H-1,2,3-triazol-4-yl)(thiazol-4- yl)methyl)amino)-8-chloro-4-((3- chloro-4-fluorophenyl)amino)- quinoline-3-carbonitrile::US11066414, Compound 353	4	aid1805683	Gilead Sciences, Inc.	134212173
1058921	InChI=1S/C28H26Cl2FN9OS/c29-21-10-18(1-2-23(21)31)35-26-17(12-32)13-33-27-20(26)9-19(11-22(27)30)36-28(25-15-42-16-34-25)24-14-40(38-37-24)4-3-39-5-7-41-8-6-39/h1-2,9-11,13-16,28,36-38H,3-8H2,(H,33,35)/t28-/m1/s1	(S)-8-chloro-4-((3-chloro-4- fluorophenyl)amino)-6-(((1-(2- morpholinoethyl)-1H-1,2,3-triazol- 4-yl)(thiazol-4-yl)methyl)amino)- quinoline-3-carbonitrile::US11066414, Compound 352	12	aid1805683	Gilead Sciences, Inc.	134212172
1058919	InChI=1S/C31H32Cl3N9S/c1-31(2,3)42-8-6-21(7-9-42)43-15-26(40-41-43)30(27-16-44-17-37-27)39-20-10-22-28(38-19-4-5-23(32)24(33)11-19)18(13-35)14-36-29(22)25(34)12-20/h4-5,10-12,14-17,21,30,39-41H,6-9H2,1-3H3,(H,36,38)/t30-/m1/s1	(S)-6-(((1-(1-(tert-butyl)piperidin-4-yl)- 1H-1,2,3-triazol-4-yl)(thiazol-4- yl)methyl)amino)-8-chloro-4-((3,4- dichlorophenyl)amino)quinoline-3- carbonitrile::US11066414, Compound 350	26	aid1805683	Gilead Sciences, Inc.	134212171
1058918	InChI=1S/C36H34Cl3FN8S/c1-36(2,3)47-10-8-24(9-11-47)48-18-31(45-46-48)35(27-19-49-32-7-4-21(37)12-25(27)32)44-23-13-26-33(43-22-5-6-30(40)28(38)14-22)20(16-41)17-42-34(26)29(39)15-23/h4-7,12-15,17-19,24,35,44-46H,8-11H2,1-3H3,(H,42,43)/t35-/m0/s1	(S)-6-(((1-(1-(tert-butyl)piperidin-4-yl)- 1H-1,2,3-triazol-4-yl)(5-chlorobenzo[b]- thiophen-3-yl)methyl)amino)-8-chloro-4- ((3-chloro-4- fluorophenyl)amino)quinoline- 3-carbonitrile::US11066414, Compound 349	41	aid1805683	Gilead Sciences, Inc.	134212170
1058916	InChI=1S/C33H33Cl2F2N9/c1-33(2,3)45-10-8-23(9-11-45)46-18-28(43-44-46)31(19-4-7-29(37)39-16-19)42-22-12-24-30(41-21-5-6-27(36)25(34)13-21)20(15-38)17-40-32(24)26(35)14-22/h4-7,12-14,16-18,23,31,42-44H,8-11H2,1-3H3,(H,40,41)/t31-/m0/s1	(S)-6-(((1-(1-(tert- butyl)piperidin-4-yl)- 1H-1,2,3-triazol-4-yl)(6- fluoropyridin- 3-yl)methyl)amino)-8- chloro-4-((3- chloro-4- fluorophenyl)amino)quinoline- 3-carbonitrile::US11066414, Compound 347	4	aid1805683	Gilead Sciences, Inc.	134212169
1058915	InChI=1S/C29H27Cl2FN8S/c1-15(2)40-13-25(38-39-40)29(21-14-41-26-12-34-6-5-19(21)26)37-18-7-20-27(36-17-3-4-24(32)22(30)8-17)16(10-33)11-35-28(20)23(31)9-18/h3-4,7-9,11,13-15,29,34,37-39H,5-6,12H2,1-2H3,(H,35,36)/t29-/m0/s1	(S)-8-chloro-4-((3-chloro-4- fluorophenyl)amino)-6-(((1-isopropyl- 1H-1,2,3-triazol-4-yl)(4,5,6,7- tetrahydrothieno[2,3-c]pyridin-3- yl)methyl)amino)quinoline-3- carbonitrile::US11066414, Compound 346	3	aid1805683	Gilead Sciences, Inc.	134212168
1058914	InChI=1S/C30H29Cl2FN8S/c1-16(2)41-13-26(38-39-41)30(22-15-42-27-14-40(3)7-6-20(22)27)37-19-8-21-28(36-18-4-5-25(33)23(31)9-18)17(11-34)12-35-29(21)24(32)10-19/h4-5,8-10,12-13,15-16,30,37-39H,6-7,14H2,1-3H3,(H,35,36)/t30-/m0/s1	(S)-8-chloro-4-((3-chloro-4- fluorophenyl)amino)-6-(((1-isopropyl- 1H-1,2,3-triazol-4-yl)(6-methyl- 4,5,6,7-tetrahydrothieno[2,3-c]pyridin- 3-yl)methyl)amino)quinoline-3- carbonitrile::US11066414, Compound 345	3	aid1805683	Gilead Sciences, Inc.	134212167
1058913	InChI=1S/C31H31Cl2FN8S/c1-4-41-8-7-21-23(16-43-28(21)15-41)31(27-14-42(17(2)3)40-39-27)38-20-9-22-29(37-19-5-6-26(34)24(32)10-19)18(12-35)13-36-30(22)25(33)11-20/h5-6,9-11,13-14,16-17,31,38-40H,4,7-8,15H2,1-3H3,(H,36,37)/t31-/m0/s1	(S)-8-chloro-4-((3-chloro-4- fluorophenyl)amino)-6-(((6-ethyl- 4,5,6,7-tetrahydrothieno[2,3- c]pyridin-3-yl)(1-isopropyl-1H-1,2,3- triazol-4-yl)methyl)amino)quinoline- 3-carbonitrile::US11066414, Compound 344	3	aid1805683	Gilead Sciences, Inc.	134212166
1058912	InChI=1S/C32H35Cl2FN10/c1-32(2,3)44-9-7-22(8-10-44)45-17-27(41-42-45)31(28-16-37-18-43(28)4)40-21-11-23-29(39-20-5-6-26(35)24(33)12-20)19(14-36)15-38-30(23)25(34)13-21/h5-6,11-13,15-18,22,31,40-42H,7-10H2,1-4H3,(H,38,39)/t31-/m1/s1	(S)-6-(((1-(1-(tert-butyl)piperidin-4- yl)-1H-1,2,3-triazol-4-yl)(1-methyl- 1H-imidazol-5-yl)methyl)amino)-8- chloro-4-((3-chloro-4-fluorophenyl)- amino)quinoline-3-carbonitrile::US11066414, Compound 342	38	aid1805683	Gilead Sciences, Inc.	134212165
1058910	InChI=1S/C29H27Cl2FN8O2/c1-41-9-10-42-8-7-40-17-26(38-39-40)28(18-3-2-6-34-15-18)37-21-11-22-27(36-20-4-5-25(32)23(30)12-20)19(14-33)16-35-29(22)24(31)13-21/h2-6,11-13,15-17,28,37-39H,7-10H2,1H3,(H,35,36)/t28-/m0/s1	(S)-8-chloro-4-((3-chloro-4- fluorophenyl)amino)-6-(((1-(2-(2- methoxyethoxy)ethyl)-1H-1,2,3- triazol-4-yl)(pyridin-3-yl)methyl)- amino)quinoline-3-carbonitrile::US11066414, Compound 340	8	aid1805683	Gilead Sciences, Inc.	134212164
1058966	InChI=1S/C27H21Cl2FN8OS/c1-39-5-4-38-13-23(36-37-38)27(24-6-15(10-31)14-40-24)35-18-7-19-25(34-17-2-3-22(30)20(28)8-17)16(11-32)12-33-26(19)21(29)9-18/h2-3,6-9,12-14,27,35-37H,4-5H2,1H3,(H,33,34)/t27-/m1/s1	(R)-8-chloro-4-((3-chloro-4- fluorophenyl)amino)-6-(((4- cyanothiophen-2-yl)(1-(2-methoxy- ethyl)-1H-1,2,3-triazol-4- yl)methyl)amino)quinoline-3- carbonitrile::US11066414, Compound 337	16	aid1805683	Gilead Sciences, Inc.	134212163
1058965	InChI=1S/C26H21Cl2FN8O/c27-20-9-17(3-4-22(20)29)33-24-16(11-30)13-32-26-19(24)8-18(10-21(26)28)34-25(15-2-1-5-31-12-15)23-14-37(6-7-38)36-35-23/h1-5,8-10,12-14,25,34-36,38H,6-7H2,(H,32,33)/t25-/m0/s1	(S)-8-chloro-4-((3-chloro-4-fluoro- phenyl)amino)-6-(((1-(2-hydroxyethyl)- 1H-1,2,3-triazol-4-yl)(pyridin-3- yl)methyl)amino)quinoline-3- carbonitrile::US11066414, Compound 336	2	aid1805683	Gilead Sciences, Inc.	134212162
1058909	InChI=1S/C27H19Cl2FN8OS/c28-20-5-16(1-2-22(20)30)34-25-15(8-32)9-33-26-19(25)4-17(6-21(26)29)35-27(24-3-14(7-31)13-40-24)23-10-38(37-36-23)18-11-39-12-18/h1-6,9-10,13,18,27,35-37H,11-12H2,(H,33,34)/t27-/m1/s1	(R)-8-chloro-4-((3-chloro-4- fluorophenyl)amino)-6-(((4- cyanothiophen-2-yl)(1-(oxetan-3-yl)- 1H-1,2,3-triazol-4-yl)methyl)amino)- quinoline-3-carbonitrile::US11066414, Compound 339	13	aid1805683	Gilead Sciences, Inc.	134212161
1058967	InChI=1S/C27H21Cl2FN8S/c1-14(2)38-12-23(36-37-38)27(24-5-15(9-31)13-39-24)35-18-6-19-25(34-17-3-4-22(30)20(28)7-17)16(10-32)11-33-26(19)21(29)8-18/h3-8,11-14,27,35-37H,1-2H3,(H,33,34)/t27-/m1/s1	(R)-8-chloro-4-((3-chloro-4- fluorophenyl)amino)-6-(((4- cyanothiophen-2-yl)(1-isopropyl- 1H-1,2,3-triazol-4-yl)methyl)- amino)quinoline-3-carbonitrile::US11066414, Compound 338	13	aid1805683	Gilead Sciences, Inc.	134212160
1058908	InChI=1S/C30H28Cl2FN9O/c31-24-13-21(3-4-26(24)33)37-28-20(15-34)17-36-30-23(28)12-22(14-25(30)32)38-29(19-2-1-5-35-16-19)27-18-42(40-39-27)7-6-41-8-10-43-11-9-41/h1-5,12-14,16-18,29,38-40H,6-11H2,(H,36,37)/t29-/m0/s1	(S)-8-chloro-4-((3-chloro-4- fluorophenyl)amino)-6-(((1-(2- morpholinoethyl)-1H-1,2,3-triazol- 4-yl)(pyridin-3-yl)methyl)amino)- quinoiine-3-carbonitrile::US11066414, Compound 335	10	aid1805683	Gilead Sciences, Inc.	134212159
1058964	InChI=1S/C26H19Cl2FN8OS/c27-19-7-16(1-2-21(19)29)33-24-15(10-31)11-32-25-18(24)6-17(8-20(25)28)34-26(23-5-14(9-30)13-39-23)22-12-37(3-4-38)36-35-22/h1-2,5-8,11-13,26,34-36,38H,3-4H2,(H,32,33)/t26-/m1/s1	(R)-8-chloro-4-((3-chloro-4- fluorophenyl)amino)-6-(((4- cyanothiophen-2-yl)(1-(2- hydroxyethyl)-1H-1,2,3-triazol- 4-yl)methyl)amino)quinoline-3- carbonitrile::US11066414, Compound 333	3	aid1805683	Gilead Sciences, Inc.	134212158
1058963	InChI=1S/C30H26Cl2FN9OS/c31-23-11-20(1-2-25(23)33)37-28-19(14-35)15-36-29-22(28)10-21(12-24(29)32)38-30(27-9-18(13-34)17-44-27)26-16-42(40-39-26)4-3-41-5-7-43-8-6-41/h1-2,9-12,15-17,30,38-40H,3-8H2,(H,36,37)/t30-/m1/s1	(R)-8-chloro-4-((3-chloro-4- fluorophenyl)amino)-6-(((4- cyanothiophen-2-yl)(1-(2-morpho- linoethyl)-1H-1,2,3-triazol-4- yl)methyl)amino)quinoline-3- carbonitrile::US11066414, Compound 332	65	aid1805683	Gilead Sciences, Inc.	134212157
1058962	InChI=1S/C26H19Cl4FN8O/c27-18-8-23(30)33-11-17(18)26(22-12-39(3-4-40)38-37-22)36-15-5-16-24(35-14-1-2-21(31)19(28)6-14)13(9-32)10-34-25(16)20(29)7-15/h1-2,5-8,10-12,26,36-38,40H,3-4H2,(H,34,35)/t26-/m0/s1	(S)-8-chloro-4-((3-chloro-4- fluorophenyl)amino)-6-(((4,6- dichloropyridin-3-yl)(1-(2-hydroxy- ethyl)-1H-1,2,3-triazol-4-yl)methyl)- amino)quinoline-3-carbonitrile::US11066414, Compound 330	59	aid1805683	Gilead Sciences, Inc.	134212156
1058905	InChI=1S/C27H22Cl3FN8O/c1-14-18(3-5-24(30)34-14)27(23-13-39(6-7-40)38-37-23)36-17-8-19-25(35-16-2-4-22(31)20(28)9-16)15(11-32)12-33-26(19)21(29)10-17/h2-5,8-10,12-13,27,36-38,40H,6-7H2,1H3,(H,33,35)/t27-/m0/s1	(S)-8-chloro-6-(((6-chloro-2- methylpyridin-3-yl)(1-(2-hydroxyethyl)- 1H-1,2,3-triazol-4-yl)methyl)amino)- 4-((3-chloro-4-fluorophenyl)amino)- quinoline-3-carbonitrile::US11066414, Compound 328	4	aid1805683	Gilead Sciences, Inc.	134212155
1058961	InChI=1S/C26H19Cl4FN8O/c27-18-8-14(1-3-20(18)31)34-23-13(10-32)11-33-24-17(23)7-15(9-19(24)28)35-25(16-2-4-22(29)36-26(16)30)21-12-39(5-6-40)38-37-21/h1-4,7-9,11-12,25,35,37-38,40H,5-6H2,(H,33,34)/t25-/m0/s1	(S)-8-chloro-4-4-((3-chloro-4- fluorophenyl)amino)-6-(((2,6- dichloropyridin-3-yl)(1- (2-hydroxyethyl)- 1H-1,2,3-triazol-4-yl)methyl)amino)- quinoline-3-carbonitrile::US11066414, Compound 329	14	aid1805683	Gilead Sciences, Inc.	134212154
1058904	InChI=1S/C33H32Cl4FN9/c1-33(2,3)46-8-6-21(7-9-46)47-17-28(44-45-47)32(23-16-40-29(37)13-24(23)34)43-20-10-22-30(42-19-4-5-27(38)25(35)11-19)18(14-39)15-41-31(22)26(36)12-20/h4-5,10-13,15-17,21,32,43-45H,6-9H2,1-3H3,(H,41,42)/t32-/m0/s1	(S)-6-(((1-(1-(tert-butyl)piperidin-4-yl)- 1H-1,2,3-triazol-4-yl)(4,6- dichloropyridin-3-yl)methyl)amino)- 8-chloro-4-((3-chloro-4-fluorophenyl)- amino)quinoline-3-carbonitrile::US11066414, Compound 326	34	aid1805683	Gilead Sciences, Inc.	134212152
1058903	InChI=1S/C33H32Cl4FN9/c1-33(2,3)46-10-8-21(9-11-46)47-17-27(44-45-47)31(22-5-7-28(36)43-32(22)37)42-20-12-23-29(41-19-4-6-26(38)24(34)13-19)18(15-39)16-40-30(23)25(35)14-20/h4-7,12-14,16-17,21,31,42,44-45H,8-11H2,1-3H3,(H,40,41)/t31-/m0/s1	(S)-6-(((1-(1-(tert-butyl)piperidin-4- yl)-1H-1,2,3-triazol-4-yl)(2,6- dichloropyridin-3-yl)methyl)amino)- 8-chloro-4-((3-chloro-4-fluorophenyl)- amino)quinoline-3-carbonitrile::US11066414, Compound 325	20	aid1805683	Gilead Sciences, Inc.	134212151
1058959	InChI=1S/C33H32BrCl3FN9/c1-33(2,3)46-8-6-22(7-9-46)47-17-28(44-45-47)31(24-10-19(34)16-41-32(24)37)43-21-11-23-29(42-20-4-5-27(38)25(35)12-20)18(14-39)15-40-30(23)26(36)13-21/h4-5,10-13,15-17,22,31,43-45H,6-9H2,1-3H3,(H,40,42)/t31-/m0/s1	(S)-6-(((5-bromo-2-chloropyridin-3- yl)(1-(1-(tert-butyl)piperidin-4-yl)- 1H-1,2,3-triazol-4-yl)methyl)amino)- 8-chloro-4-((3-chloro-4-fluorophenyl)- amino)quinoline-3-carbonitrile::US11066414, Compound 324	10	aid1805683	Gilead Sciences, Inc.	134212150
1058898	InChI=1S/C34H35Cl3FN9/c1-19-24(6-8-30(37)41-19)33(29-18-47(45-44-29)23-9-11-46(12-10-23)34(2,3)4)43-22-13-25-31(42-21-5-7-28(38)26(35)14-21)20(16-39)17-40-32(25)27(36)15-22/h5-8,13-15,17-18,23,33,43-45H,9-12H2,1-4H3,(H,40,42)/t33-/m0/s1	(S)-6-(((Ml-(tert-butyl)piperidin-4-yl)- 1H-1,2,3-triazol-4-yl)(6-chloro-2- methylpyridin-3-yl)methyl)amino)- 8-chloro-4-((3-chloro-4-fluorophenyl)- amino)quinoline-3-carbonitrile::US11066414, Compound 318	8	aid1805683	Gilead Sciences, Inc.	134212149
1058894	InChI=1S/C32H30Cl2FN9O/c33-26-11-21(3-4-28(26)35)39-30-20(13-36)15-38-32-25(30)10-22(12-27(32)34)40-31(19-2-1-7-37-14-19)29-16-44(42-41-29)23-5-8-43(9-6-23)24-17-45-18-24/h1-4,7,10-12,14-16,23-24,31,40-42H,5-6,8-9,17-18H2,(H,38,39)/t31-/m0/s1	(S)-8-chloro-4-((3-chloro-4- fluorophenyl)amino)-6-(((1-(1-(oxetan-3- yl)piperidin-4-yl)-1H-1,2,3-triazol-4- yl)(pyridin-3-yl)methyl)amino)quinoline- 3-carbonitrile::US11066414, Compound 314	15	aid1805683	Gilead Sciences, Inc.	134212148
1058896	InChI=1S/C28H20Cl2FN9S/c29-21-8-17(4-5-23(21)31)36-26-16(10-32)11-34-27-20(26)7-19(9-22(27)30)37-28(25-14-41-15-35-25)24-13-40(39-38-24)12-18-3-1-2-6-33-18/h1-9,11,13-15,28,37-39H,12H2,(H,34,36)/t28-/m1/s1	(S)-8-chloro-4-((3-chloro-4- fluorophenyl)amino)-6-(((1-(pyridin-2- ylmethyl)-1H-1,2,3-triazol-4-yl)(thiazol- 4-yl)methyl)amino)quinoline-3- carbonitrile::US11066414, Compound 316	6	aid1805683	Gilead Sciences, Inc.	134212147
1058895	InChI=1S/C33H33Cl3FN9/c1-33(2,3)45-11-8-22(9-12-45)46-18-28(43-44-46)31(23-5-4-10-39-32(23)36)42-21-13-24-29(41-20-6-7-27(37)25(34)14-20)19(16-38)17-40-30(24)26(35)15-21/h4-7,10,13-15,17-18,22,31,42-44H,8-9,11-12H2,1-3H3,(H,40,41)/t31-/m0/s1	(S)-6-(((1-(1-(tert-butyl)piperidin-4-yl)- 1H-1,2,3-triazol-4-yl)(2-chloropyridin-3- yl)methyl)arnino)-8-chloro-4-((3-chloro- 4-fluorophenyl)amino)quinoline-3- carbonitrile::US11066414, Compound 315	4	aid1805683	Gilead Sciences, Inc.	134212146
1058892	InChI=1S/C25H21Cl2FN8O/c1-13(2)36-10-21(34-35-36)25(22-11-37-12-31-22)33-16-5-17-23(32-15-3-4-20(28)18(26)6-15)14(8-29)9-30-24(17)19(27)7-16/h3-7,9-13,25,33-35H,1-2H3,(H,30,32)/t25-/m1/s1	(S)-8-chloro-4-((3-chloro-4- fluorophenyl)amino)-6-(((1-isopropyl- 1H-1,2,3-triazol-4-yl)(oxazol-4 -yl)methyl)amino)quinoline-3- carbonitrile::US11066414, Compound 312	13	aid1805683	Gilead Sciences, Inc.	134212145
1058893	InChI=1S/C27H21Cl2FN8O/c28-21-7-17(3-4-23(21)30)34-25-16(9-31)11-33-27-20(25)6-18(8-22(27)29)35-26(15-2-1-5-32-10-15)24-12-38(37-36-24)19-13-39-14-19/h1-8,10-12,19,26,35-37H,13-14H2,(H,33,34)/t26-/m0/s1	(S)-8-chloro-4-((3-chloro-4- fluorophenyl)amino)-6-(((1-(oxetan-3- yl)-1H-1,2,3-triazol-4-yl)(pyridin-3- yl)methyl)amino)quinoline-3-carbonitrile::US11066414, Compound 313	5	aid1805683	Gilead Sciences, Inc.	134212144
1058890	InChI=1S/C33H34Cl2FN9/c1-32(2)13-23(14-33(3,4)43-32)45-18-28(42-44-45)30(19-6-5-9-38-16-19)41-22-10-24-29(40-21-7-8-27(36)25(34)11-21)20(15-37)17-39-31(24)26(35)12-22/h5-12,16-18,23,30,41-44H,13-14H2,1-4H3,(H,39,40)/t30-/m0/s1	(S)-8-chloro-4-((3-chloro-4- fluorophenyl)amino)-6-((pyridin-3- yl(1H-2,2,6,6-tetramethylpiperidin-4- yl)-1H-1,2,3-triazol-4-yl)methyl)amino)- quinoline-3-carbonitrile::US11066414, Compound 309	8	aid1805683	Gilead Sciences, Inc.	134212143
1058891	InChI=1S/C26H23Cl2FN8O/c1-26(2,3)37-11-21(35-36-37)25(22-12-38-13-32-22)34-16-6-17-23(33-15-4-5-20(29)18(27)7-15)14(9-30)10-31-24(17)19(28)8-16/h4-8,10-13,25,34-36H,1-3H3,(H,31,33)/t25-/m1/s1	(S)-6-(((1-(tert-butyl)-1H-1,2,3-triazol-4- yl)(oxazol-4-yl)methyl)amino)-8-chloro- 4-((3-chloro-4-fluorophenyl)amino)- quinoline-3-carbonitrile::US11066414, Compound 310	40	aid1805683	Gilead Sciences, Inc.	134212142
1058957	InChI=1S/C26H24Cl2FN9/c1-14(2)38-12-22(35-36-38)26(23-11-31-13-37(23)3)34-17-6-18-24(33-16-4-5-21(29)19(27)7-16)15(9-30)10-32-25(18)20(28)8-17/h4-8,10-14,26,34-36H,1-3H3,(H,32,33)/t26-/m1/s1	(S)-8-chloro-4-((3-chloro-4- fluorophenyl)amino)-6-(((1-isopropyl- 1H-1,2,3-triazol-4-yl)(1-methyl-1H- imidazol-5-yl)methyl)amino)quinoline- 3-carbonitrile::US11066414, Compound 311	30	aid1805683	Gilead Sciences, Inc.	134212141
1058883	InChI=1S/C29H26Cl2FN9O2S/c30-21-8-17(1-2-23(21)32)35-26-16(10-33)11-34-27-20(26)7-18(9-22(27)31)36-28(24-12-41(39-38-24)19-13-43-14-19)25-15-44-29(37-25)40-3-5-42-6-4-40/h1-2,7-9,11-12,15,19,28,36,38-39H,3-6,13-14H2,(H,34,35)/t28-/m1/s1	(S)-8-chloro-4-((3-chloro-4-fluoro- phenyl)amino)-6-(((2-morpholinothiazol- 4-yl)(1-(oxetan-3-yl)-1H-1,2,3-triazol- 4-yl)methyl)amino)quinoline-3- carbonitrile::US11066414, Compound 302	10	aid1805683	Gilead Sciences, Inc.	134212140
1058885	InChI=1S/C26H24Cl2FN9/c1-14(2)38-13-22(35-36-38)26(23-6-7-32-37(23)3)34-17-8-18-24(33-16-4-5-21(29)19(27)9-16)15(11-30)12-31-25(18)20(28)10-17/h4-10,12-14,26,34-36H,1-3H3,(H,31,33)/t26-/m1/s1	(S)-8-chloro-4-((3-chloro-4- fluorophenyl)amino)-6-(((1-isopropyl- 1H-1,2,3-triazol-4-yl)(1-methyl-1H- pyrazol-5-yl)methyl)amino)quinoline-3- carbonitrile::US11066414, Compound 304	6	aid1805683	Gilead Sciences, Inc.	134212139
1058886	InChI=1S/C32H35Cl2FN10/c1-32(2,3)44-11-8-22(9-12-44)45-18-27(41-42-45)31(28-7-10-38-43(28)4)40-21-13-23-29(39-20-5-6-26(35)24(33)14-20)19(16-36)17-37-30(23)25(34)15-21/h5-7,10,13-15,17-18,22,31,40-42H,8-9,11-12H2,1-4H3,(H,37,39)/t31-/m1/s1	(S)-6-(((1-(1-(tert-butyl)piperidin-4-yl)- 1H-1,2,3-triazol-4-yl)(1-methyl-1H- pyrazol-5-yl)methyl)amino)-8-chloro- 4-((3-chloro-4- fluorophenyl)amino)quinoline- 3-carbonitrile::US11066414, Compound 305	3	aid1805683	Gilead Sciences, Inc.	134212138
1058884	InChI=1S/C25H21Cl2FN8S/c1-13(2)36-11-21(34-35-36)25(22-10-30-12-37-22)33-16-5-17-23(32-15-3-4-20(28)18(26)6-15)14(8-29)9-31-24(17)19(27)7-16/h3-7,9-13,25,33-35H,1-2H3,(H,31,32)/t25-/m1/s1	(R)-8-chloro-4-((3-chloro-4- fluorophenyl)amino)-6-(((1-isopropyl- 1H-1,2,3-triazol-4-yl)(thiazol-5- yl)methyl)amino)quinoline-3- carbonitrile::US11066414, Compound 303	14	aid1805683	Gilead Sciences, Inc.	134212137
1058881	InChI=1S/C35H39Cl2FN10OS/c1-35(2,3)47-8-6-24(7-9-47)48-19-29(44-45-48)33(30-20-50-34(43-30)46-10-12-49-13-11-46)42-23-14-25-31(41-22-4-5-28(38)26(36)15-22)21(17-39)18-40-32(25)27(37)16-23/h4-5,14-16,18-20,24,33,42,44-45H,6-13H2,1-3H3,(H,40,41)/t33-/m1/s1	(S)-6-(((1-0-(tert-butyl)piperidin-4- yl)-1H-1,2,3-triazol-4-yl)(2-morpholino- thiazol-4-yl)methyl)amino)-8-chloro-4- ((3-chloro-4-fluorophenyl)amino)quinoline- 3-carbonitrile::US11066414, Compound 300	7	aid1805683	Gilead Sciences, Inc.	134212136
1058875	InChI=1S/C28H24Cl3FN8/c1-14(2)40-13-24(38-39-40)28(19-5-7-25(31)35-15(19)3)37-18-8-20-26(36-17-4-6-23(32)21(29)9-17)16(11-33)12-34-27(20)22(30)10-18/h4-10,12-14,28,37-39H,1-3H3,(H,34,36)/t28-/m0/s1	(S)-8-chloro-6-(((6- chloro-2-methylpyridin- 3-yl)(1-isopropyl-1H-1,2,3-triazol-4- yl)methyl)amino)-4-((3-chloro-4- fluorophenyl)amino)quinoline-3- carbonitrile::US11066414, Compound 294	9	aid1805683	Gilead Sciences, Inc.	134212135
1058882	InChI=1S/C29H28Cl2FN9OS/c1-16(2)41-14-24(38-39-41)28(25-15-43-29(37-25)40-5-7-42-8-6-40)36-19-9-20-26(35-18-3-4-23(32)21(30)10-18)17(12-33)13-34-27(20)22(31)11-19/h3-4,9-11,13-16,28,36,38-39H,5-8H2,1-2H3,(H,34,35)/t28-/m1/s1	(S)-8-chloro-4-((3-chloro-4-fluoro- phenyl)amino)-6-(((1-isopropyl-1H- 1,2,3-triazol-4-yl)(2-morpholinothiazol- 4-yl)methyl)amino)quinoline-3- carbonitrile::US11066414, Compound 301	14	aid1805683	Gilead Sciences, Inc.	134212134
1058880	InChI=1S/C31H32Cl2FN9O/c1-31(2,3)42-8-6-21(7-9-42)43-16-26(40-41-43)30(27-15-36-17-44-27)39-20-10-22-28(38-19-4-5-25(34)23(32)11-19)18(13-35)14-37-29(22)24(33)12-20/h4-5,10-12,14-17,21,30,39-41H,6-9H2,1-3H3,(H,37,38)/t30-/m1/s1	(R)-6-(((1-(1-(tert-butyl)piperidin-4- yl)-1H-1,2,3-triazol-4-yl)(oxazol-5- yl)methyl)amino)-8-chloro-4-((3- chloro-4-fluorophenyl)amino)quinoline- 3-carbonitrile::US11066414, Compound 299	18	aid1805683	Gilead Sciences, Inc.	134212133
1058956	InChI=1S/C27H21BrCl3FN8/c1-13(2)40-12-23(38-39-40)26(19-5-15(28)11-35-27(19)31)37-17-6-18-24(36-16-3-4-22(32)20(29)7-16)14(9-33)10-34-25(18)21(30)8-17/h3-8,10-13,26,37-39H,1-2H3,(H,34,36)/t26-/m0/s1	(S)-6-(((5-brorno-2-chloropyridin-3- yl)(1-isopropyl-1H-1,2,3-triazol-4- yl)methyl)amino)-8-chloro-4-((3- chloro-4-fluorophenyl)- amino)quinoline- 3-carbonitrile::US11066414, Compound 293	32	aid1805683	Gilead Sciences, Inc.	134212132
1058878	InChI=1S/C27H22Cl3FN8/c1-14(2)39-13-23(37-38-39)26(18-4-3-7-33-27(18)30)36-17-8-19-24(35-16-5-6-22(31)20(28)9-16)15(11-32)12-34-25(19)21(29)10-17/h3-10,12-14,26,36-38H,1-2H3,(H,34,35)/t26-/m0/s1	(S)-8-chloro-4-((3-chloro-4-fluoro- phenyl)amino)-6-(((2-chloropyridin- 3-yl)(1-isopropyl-1H-1,2,3-triazol-4- yl)methyl)amino)quinoline-3- carbonitrile::US11066414, Compound 297	9	aid1805683	Gilead Sciences, Inc.	134212131
1058877	InChI=1S/C27H21Cl4FN8/c1-13(2)40-12-23(38-39-40)27(18-11-34-24(31)8-19(18)28)37-16-5-17-25(36-15-3-4-22(32)20(29)6-15)14(9-33)10-35-26(17)21(30)7-16/h3-8,10-13,27,37-39H,1-2H3,(H,35,36)/t27-/m0/s1	(S)-8-chloro-4-((3-chloro-4-fluoro- phenyl)amino)-6-(((4,6-dichloropyridin- 3-yl)(1-isopropyl-1H-1,2,3-triazol-4- yl)methyl)amino)quinoline-3- carbonitrile::US11066414, Compound 296	80	aid1805683	Gilead Sciences, Inc.	134212130
1058876	InChI=1S/C27H21Cl4FN8/c1-13(2)40-12-22(38-39-40)26(17-4-6-23(30)37-27(17)31)36-16-7-18-24(35-15-3-5-21(32)19(28)8-15)14(10-33)11-34-25(18)20(29)9-16/h3-9,11-13,26,36,38-39H,1-2H3,(H,34,35)/t26-/m0/s1	(S)-8-chloro-4-((3-chloro-4-fluoro- phenyl)amino)-6-(((2,6-dichloropyridin- 3-yl)(1-isopropyl-1H-1,2,3-triazol-4- yl)methyl)amino)quinoline-3- carbonitrile::US11066414, Compound 295	23	aid1805683	Gilead Sciences, Inc.	134212129
1058872	InChI=1S/C34H36Cl2FN9O/c1-34(2,3)45-11-9-24(10-12-45)46-19-29(43-44-46)32(20-5-8-30(47-4)39-17-20)42-23-13-25-31(41-22-6-7-28(37)26(35)14-22)21(16-38)18-40-33(25)27(36)15-23/h5-8,13-15,17-19,24,32,42-44H,9-12H2,1-4H3,(H,40,41)/t32-/m0/s1	(S)-6-(((1-(1-(tert-butyl)piperidin-4- yl)-1H-1,2,3-triazol-4-yl)(6-methoxy- pyridin-3-yl)methyl)amino)-8-chloro- 4-((3-chloro-4-fluorophenyl)amino)- quinoline-3-carbonitrile::US11066414, Compound 290	12	aid1805683	Gilead Sciences, Inc.	134212128
1058864	InChI=1S/C28H25Cl2FN8/c1-15(2)39-14-25(37-38-39)28(20-5-4-8-33-16(20)3)36-19-9-21-26(35-18-6-7-24(31)22(29)10-18)17(12-32)13-34-27(21)23(30)11-19/h4-11,13-15,28,36-38H,1-3H3,(H,34,35)/t28-/m0/s1	(S)-8-chloro-4-((3-chloro-4- fluorophenyl)amino)-6-(((1-isopropyl- 1H-1,2,3-triazol-4-yl)(2- methylpyridin-3-yl)methyl)amino)- quinoline-3-carboni trile::US11066414, Compound 282	3	aid1805683	Gilead Sciences, Inc.	134212126
1058862	InChI=1S/C28H25Cl2FN8/c1-15(2)39-14-25(37-38-39)27(17-5-4-16(3)33-12-17)36-20-8-21-26(35-19-6-7-24(31)22(29)9-19)18(11-32)13-34-28(21)23(30)10-20/h4-10,12-15,27,36-38H,1-3H3,(H,34,35)/t27-/m0/s1	(S)-8-chloro-4-((3-chloro-4- fluorophenyl)amino)-6-(((1-isopropyl- 1H-1,2,3-triazol-4-yl)(6-methylpyridin- 3-yl)methyl)amino)quinoline-3- carbonitrile::US11066414, Compound 280	16	aid1805683	Gilead Sciences, Inc.	134212125
1058861	InChI=1S/C29H25Cl2FN8OS/c30-22-6-16(1-2-24(22)32)36-27-15(8-33)9-35-28-20(27)5-17(7-23(28)31)37-29(21-14-42-26-10-34-4-3-19(21)26)25-11-40(39-38-25)18-12-41-13-18/h1-2,5-7,9,11,14,18,29,34,37-39H,3-4,10,12-13H2,(H,35,36)/t29-/m0/s1	(S)-8-chloro-4-((3-chloro-4- fluorophenyl)amino)-6-(((1-(oxetan- 3-yl)-1H-1,2,3-triazol-4-yl)(4,5,6,7- tetrahydrothieno[2,3-c]pyridin-3- yl)methyl)amino)quinoline-3- carbonitrile::US11066414, Compound 279	3	aid1805683	Gilead Sciences, Inc.	134212124
1058860	InChI=1S/C31H29Cl2FN8OS/c1-2-41-6-5-21-23(16-44-28(21)13-41)31(27-12-42(40-39-27)20-14-43-15-20)38-19-7-22-29(37-18-3-4-26(34)24(32)8-18)17(10-35)11-36-30(22)25(33)9-19/h3-4,7-9,11-12,16,20,31,38-40H,2,5-6,13-15H2,1H3,(H,36,37)/t31-/m0/s1	(S)-8-chloro-4-((3-chloro-4- fluorophenyl)amino)-6-(((6-ethyl- 4,5,6,7-tetrahydro- thieno[2,3-c]pyridin- 3-yl)(1-(oxetan-3-yl)-1H- 1,2,3-triazol- 4-yl)methyl)amino)quinoline-3- carbonitrile::US11066414, Compound 278	3	aid1805683	Gilead Sciences, Inc.	134212123
1058857	InChI=1S/C26H21Cl2FN8S/c27-19-6-14(1-2-21(19)29)34-24-13(8-30)9-32-25-17(24)5-15(7-20(25)28)35-26(22-10-33-37-36-22)18-12-38-23-11-31-4-3-16(18)23/h1-2,5-7,9-10,12,26,31,33,35-37H,3-4,11H2,(H,32,34)/t26-/m0/s1	(S)-8-chloro-4-((3-chloro-4- fluorophenyl)amino)-6-(((4,5,6,7- tetrahydrothieno[2,3-c]pyridin-3- yl)(1H-1,2,3-triazol-4-yl)methyl)- amino)quinoline-3-carbonitrile::US11066414, Compound 275	7	aid1805683	Gilead Sciences, Inc.	134212122
1058854	InChI=1S/C25H19Cl2FN8/c1-13-17(3-2-6-30-13)25(22-12-32-36-35-22)34-16-7-18-23(33-15-4-5-21(28)19(26)8-15)14(10-29)11-31-24(18)20(27)9-16/h2-9,11-12,25,32,34-36H,1H3,(H,31,33)/t25-/m0/s1	(S)-8-chloro-4-((3-chloro-4- fluorophenyl)amino)-6-(((2- methylpyridin-3-yl)(1H-1,2,3-triazol- 4-yl)methyl)amino)quinoline-3- carbonitrile::US11066414, Compound 272	5	aid1805683	Gilead Sciences, Inc.	134212121
1058853	InChI=1S/C25H19Cl2FN8/c1-13-2-3-14(10-30-13)24(22-12-32-36-35-22)34-17-6-18-23(33-16-4-5-21(28)19(26)7-16)15(9-29)11-31-25(18)20(27)8-17/h2-8,10-12,24,32,34-36H,1H3,(H,31,33)/t24-/m0/s1	(S)-8-chloro-4-((3-chloro-4- fluorophenyl)amino)-6-(((6- methylpyridin-3-yl)(1H-1,2,3- triazol-4-yl)methyl)amino)quinoline- 3-carbonitrile::US11066414, Compound 271	9	aid1805683	Gilead Sciences, Inc.	134212120
1058851	InChI=1S/C29H25Cl2FN8OS/c30-22-6-16(1-2-24(22)32)36-27-15(8-33)9-34-28-20(27)5-17(7-23(28)31)37-29(25-10-35-39-38-25)21-14-42-26-11-40(4-3-19(21)26)18-12-41-13-18/h1-2,5-7,9-10,14,18,29,35,37-39H,3-4,11-13H2,(H,34,36)/t29-/m0/s1	(S)-8-chloro-4-((3-chloro-4- fluorophenyl)amino)-6-(((6- (oxetan-3-yl )-4,5,6,7- tetrahydrothieno[2,3-c]pyridin- yl)(1H-1,2,3-triazol-4- yl)methyl)amino)quinoline-3- carbonitrile::US11066414, Compound 269	6	aid1805683	Gilead Sciences, Inc.	134212119
1058849	InChI=1S/C32H35Cl2FN10/c1-32(2,3)44-9-7-22(8-10-44)45-17-28(41-42-45)31(27-16-43(4)18-38-27)40-21-11-23-29(39-20-5-6-26(35)24(33)12-20)19(14-36)15-37-30(23)25(34)13-21/h5-6,11-13,15-18,22,31,40-42H,7-10H2,1-4H3,(H,37,39)/t31-/m0/s1	(S)-6-(((1-(1-(tert-butyl)piperidin-4- yl)-1H-1,2,3-triazol-4-yl)(1-methyl- 1H-imidazol-4-yl)methyl)amino)-8- chloro-4-((3-chloro-4-fluorophenyl)- amino)quinoline-3-carbonitrile::US11066414, Compound 267	30	aid1805683	Gilead Sciences, Inc.	134212118
1058846	InChI=1S/C33H37Cl2FN8O/c1-33(2,3)43-10-6-24(7-11-43)44-19-29(41-42-44)31(20-8-12-45-13-9-20)40-23-14-25-30(39-22-4-5-28(36)26(34)15-22)21(17-37)18-38-32(25)27(35)16-23/h4-5,8,14-16,18-19,24,31,40-42H,6-7,9-13H2,1-3H3,(H,38,39)/t31-/m0/s1	(S)-6-(((1-(1-(tert-butyl)piperidin-4- yl)-1H-1,2,3-triazol-4-yl)(3,6-dihydro- 2H-pyran-4-yl)methyl)amino)-8- chloro-4-((3-chloro-4-fluorophenyl)- amino)quinoline-3-carbonitrile::US11066414, Compound 264	2	aid1805683	Gilead Sciences, Inc.	134212117
1058844	InChI=1S/C33H36Cl2FN9O/c1-18-29(39-19(2)46-18)32(28-17-45(43-42-28)23-8-10-44(11-9-23)33(3,4)5)41-22-12-24-30(40-21-6-7-27(36)25(34)13-21)20(15-37)16-38-31(24)26(35)14-22/h6-7,12-14,16-17,23,32,41-43H,8-11H2,1-5H3,(H,38,40)/t32-/m1/s1	(S)-6-(((1-(1-(tert-butyl)piperidin-4-yl)- 1H-1,2,3-triazol-4-yl)(2,5-dimethyloxazol- 4-yl)methyl)amino)-8-chloro-4-((3- chloro-4-fluorophenyl)amino)quinoline- 3-carbonitrile::US11066414, Compound 262	11	aid1805683	Gilead Sciences, Inc.	134212116
1058838	InChI=1S/C24H16Cl3FN8/c25-16-3-4-18(21(28)20(16)27)34-22-13(8-29)10-31-24-15(22)6-14(7-17(24)26)33-23(19-11-32-36-35-19)12-2-1-5-30-9-12/h1-7,9-11,23,32-33,35-36H,(H,31,34)/t23-/m0/s1	(S)-8-chloro-4-((3,4-dichloro-2- fluorophenyl)amino)-6-((pyridin-3- yl(1H-1,2,3-triazol-4-yl)methyl)- amino)quinoline-3-carbonitrile::US11066414, Compound 256	16	aid1805683	Gilead Sciences, Inc.	134212115
1058843	InChI=1S/C33H36Cl2FN9S/c1-18-32(46-19(2)39-18)31(28-17-45(43-42-28)23-8-10-44(11-9-23)33(3,4)5)41-22-12-24-29(40-21-6-7-27(36)25(34)13-21)20(15-37)16-38-30(24)26(35)14-22/h6-7,12-14,16-17,23,31,41-43H,8-11H2,1-5H3,(H,38,40)/t31-/m1/s1	(R)-6-(((1-(1-(tert-butyl)piperidin-4-yl)- 1H-1,2,3-triazol-4-yl)(2,4-dimethyl- thiazol-5-yl)methyl)amino)-8-chloro- 4-((3-chloro-4-fluorophenyl)amino)- quinoline-3-carbonitrile::US11066414, Compound 261	14	aid1805683	Gilead Sciences, Inc.	134212114
1058841	InChI=1S/C35H40ClN9/c1-23(24-9-6-5-7-10-24)40-32-26(19-37)21-39-34-29(32)17-27(18-30(34)36)41-33(25-11-8-14-38-20-25)31-22-45(43-42-31)28-12-15-44(16-13-28)35(2,3)4/h5-11,14,17-18,20-23,28,33,41-43H,12-13,15-16H2,1-4H3,(H,39,40)/t23-,33+/m1/s1	6-(((S)-(1-(1-(tert-butyl)piperidin-4-yl)- 1H-1,2,3-triazol-4-yl)(pyridin-3- yl)methyl)amino)-8-chloro-4-(((R)- 1-phenylethyl)amino)quinoline-3- carbonitrile::US11066414, Compound 259	6	aid1805683	Gilead Sciences, Inc.	134212113
1058832	InChI=1S/C34H36Cl2FN9/c1-20-11-21(17-39-16-20)32(30-19-46(44-43-30)25-7-9-45(10-8-25)34(2,3)4)42-24-12-26-31(41-23-5-6-29(37)27(35)13-23)22(15-38)18-40-33(26)28(36)14-24/h5-6,11-14,16-19,25,32,42-44H,7-10H2,1-4H3,(H,40,41)/t32-/m0/s1	(S)-6-(((1-(1-(tert-butyl)piperidin-4- yl)-1H-1,2,3-triazol-4-yl)(5- methylpyridin- 3-yl)methyl)amino)-8-chloro-4-((3- chloro-4- fluorophenyl)amino)quinoline- 3-carbonitrile::US11066414, Compound 250	5	aid1805683	Gilead Sciences, Inc.	134212111
1058831	InChI=1S/C25H19Cl2FN8/c1-13-4-14(10-30-9-13)24(22-12-32-36-35-22)34-17-5-18-23(33-16-2-3-21(28)19(26)6-16)15(8-29)11-31-25(18)20(27)7-17/h2-7,9-12,24,32,34-36H,1H3,(H,31,33)/t24-/m0/s1	(S)-8-chloro-4--((3-chloro-4- fluorophenyl)amino)-6-(((5- methylpyridin-3-yl)(1H-1,2,3-triazol- 4-yl)methyl)amino)quinoline-3- carbonitrile::US11066414, Compound 249	12	aid1805683	Gilead Sciences, Inc.	134212109
1058828	InChI=1S/C29H25Cl2FN8OS/c30-21-2-1-3-23(26(21)32)37-27-15(8-33)9-34-28-19(27)6-16(7-22(28)31)36-29(24-10-35-39-38-24)20-14-42-25-11-40(5-4-18(20)25)17-12-41-13-17/h1-3,6-7,9-10,14,17,29,35-36,38-39H,4-5,11-13H2,(H,34,37)/t29-/m0/s1	(S)-8-chloro-4-((3-chloro-2- fluorophenyl)amino)-6-(((6-(oxetan-3- yl)-4,5,6,7-tetrahydrothieno[2,3- c]pyridin-3-yl )(1H-1,2,3-triazol-4- yl)methyl)amino)quinoline-3- carbonitrile::US11066414, Compound 246	6	aid1805683	Gilead Sciences, Inc.	134212108
1058827	InChI=1S/C28H25Cl2FN8/c1-15(2)39-14-24(37-38-39)28(19-6-5-9-33-16(19)3)35-18-10-20-26(36-23-8-4-7-21(29)25(23)31)17(12-32)13-34-27(20)22(30)11-18/h4-11,13-15,28,35,37-38H,1-3H3,(H,34,36)/t28-/m0/s1	(S)-8-chloro-4-((3-chloro-2- fluorophenyl)amino)-6- (((1-isopropyl- 1H-1,2,3-triazol-4- yl)(2-methylpyridin- 3-yl)methyl)amino)quinoline-3- carbonitrile::US11066414, Compound 245	2	aid1805683	Gilead Sciences, Inc.	134212107
1058823	InChI=1S/C38H42Cl2FN9OS/c1-38(2,3)49-11-7-24(8-12-49)50-17-32(46-47-50)37(28-21-52-33-18-48(10-9-26(28)33)25-19-51-20-25)44-23-13-27-35(45-31-6-4-5-29(39)34(31)41)22(15-42)16-43-36(27)30(40)14-23/h4-6,13-14,16-17,21,24-25,37,44,46-47H,7-12,18-20H2,1-3H3,(H,43,45)/t37-/m0/s1	(S)-6-(((1-(1-(tert-butyl)piperidin- 4-yl)-1H-1,2,3-triazol-4-yl)(6- (oxetan-3-yl)-4,5,6,7- tetrahydrothieno[2,3-c]pyridin-3- yl)methyl)amino)-8-chloro-4-((3- chloro-2-fluorophenyl)amino)- quinoline-3-carbonitrile::US11066414, Compound 241	2	aid1805683	Gilead Sciences, Inc.	134212106
1058821	InChI=1S/C28H29ClN8S/c1-16(2)37-14-24(35-36-37)27(28-18(4)32-15-38-28)34-21-10-22-25(33-17(3)19-8-6-5-7-9-19)20(12-30)13-31-26(22)23(29)11-21/h5-11,13-17,27,34-36H,1-4H3,(H,31,33)/t17-,27-/m1/s1	8-chloro-6-(((R)-(1-isopropyl-1H- 1,2,3-triazol-4-yl)(4-methylthiazol- 5-yl)methyl)amino)-4-(((R)-1- phenylethyl)amino)quinoline-3- carbonitrile::US11066414, Compound 239	16	aid1805683	Gilead Sciences, Inc.	134212105
1058820	InChI=1S/C31H31ClN8OS/c1-18(19-5-3-2-4-6-19)36-29-20(11-33)12-34-30-24(29)9-21(10-26(30)32)37-31(27-13-35-39-38-27)25-17-42-28-14-40(8-7-23(25)28)22-15-41-16-22/h2-6,9-10,12-13,17-18,22,31,35,37-39H,7-8,14-16H2,1H3,(H,34,36)/t18-,31+/m1/s1	8-chloro-6-(((S)-(6-(oxetan-3-yl)- 4,5,6,7-tetrahydrothieno[2,3-c]pyridin- 3-yl)(1H-1,2,3-triazol-4- yl)methyl)amino)-4-(((R)-1- phenylethyl)amino)quinoline-3- carbonitrile::US11066414, Compound 238	3	aid1805683	Gilead Sciences, Inc.	134212104
1058819	InChI=1S/C40H48ClN9OS/c1-25(26-8-6-5-7-9-26)44-37-27(18-42)19-43-38-32(37)16-28(17-34(38)41)45-39(33-24-52-36-21-48(13-12-31(33)36)30-22-51-23-30)35-20-50(47-46-35)29-10-14-49(15-11-29)40(2,3)4/h5-9,16-17,19-20,24-25,29-30,39,45-47H,10-15,21-23H2,1-4H3,(H,43,44)/t25-,39+/m1/s1	6-(((SHHl-(tert-butyl)piperidin-4-yl)- 1H-1,2,3-triazol-4-yl)(6-(oxetan-3-yl)- 4,5,6,7-tetrahydrothieno[2,3-c]pyridin- 3-yl)methyl)amino)-8-chloro-4-(((R)- 1-phenylethyl)amino)quinoline-3- carbonitrile::US11066414, Compound 237	1	aid1805683	Gilead Sciences, Inc.	134212103
1058816	InChI=1S/C23H16Cl3FN8S/c1-10-23(36-9-30-10)22(17-8-31-35-34-17)32-12-4-13-20(11(6-28)7-29-21(13)15(25)5-12)33-16-3-2-14(24)18(26)19(16)27/h2-5,7-9,22,31-32,34-35H,1H3,(H,29,33)/t22-/m1/s1	(R)-8-chloro-4-((3,4-dichloro-2- fluorophenyl)amino)-6-(((4- methylthiazol-5-yl)(1H-1,2,3- triazol-4-yl)methyl)amino)quinoline- 3-carbonitrile::US11066414, Compound 234	21	aid1805683	Gilead Sciences, Inc.	134212102
1058814	InChI=1S/C28H24Cl3FN8/c1-14(2)40-13-23(38-39-40)28(18-5-4-8-34-15(18)3)36-17-9-19-26(16(11-33)12-35-27(19)21(30)10-17)37-22-7-6-20(29)24(31)25(22)32/h4-10,12-14,28,36,38-39H,1-3H3,(H,35,37)/t28-/m0/s1	(S)-8-chloro-4-((3,4-dichloro-2- fluorophenyl)amino)-6-(((1-isopropyl- 1H-1,2,3-triazol-4- yl)(2-methylpyridin- 3-yl)methyl)amino)quinoline-3- carbonitrile::US11066414, Compound 232	15	aid1805683	Gilead Sciences, Inc.	134212101
1058812	InChI=1S/C30H31ClN8/c1-18(2)39-17-27(37-38-39)30(24-11-8-12-33-20(24)4)36-23-13-25-28(35-19(3)21-9-6-5-7-10-21)22(15-32)16-34-29(25)26(31)14-23/h5-14,16-19,30,36-38H,1-4H3,(H,34,35)/t19-,30+/m1/s1	8-chloro-6-(((S)-(1-isopropyl-1H- 1,2,3-triazol-4-yl)(2-methylpyridin- 3-yl)methyl)amino)-4-(((R)-1- phenylethyl)amino)quinoline-3- carbonitrile::US11066414, Compound 230	9	aid1805683	Gilead Sciences, Inc.	134212100
1058804	InChI=1S/C29H24Cl3FN8OS/c30-20-1-2-22(26(33)25(20)32)38-27-14(7-34)8-35-28-18(27)5-15(6-21(28)31)37-29(23-9-36-40-39-23)19-13-43-24-10-41(4-3-17(19)24)16-11-42-12-16/h1-2,5-6,8-9,13,16,29,36-37,39-40H,3-4,10-12H2,(H,35,38)/t29-/m0/s1	(S)-8-chloro-4-((3,4-dichloro-2- fluorophenyl)amino)-6- (((6-(oxetan-3- yl)-4,5,6,7-tetrahydrothieno[2,3- c]pyridin-3-yl )(1H-1,2,3-triazol-4- yl)methyl)amino)quinoline-3- carbonitrile::US11066414, Compound 222	19	aid1805683	Gilead Sciences, Inc.	134212099
1058799	InChI=1S/C26H20Cl3FN8OS/c1-12-26(40-11-33-12)25(20-8-38(37-36-20)15-9-39-10-15)34-14-4-16-23(13(6-31)7-32-24(16)18(28)5-14)35-19-3-2-17(27)21(29)22(19)30/h2-5,7-8,11,15,25,34,36-37H,9-10H2,1H3,(H,32,35)/t25-/m1/s1	(R)-8-chloro-4-((3,4-dichloro-2- fluorophenyl)amino)-6-(((4- methylthiazol-5-yl)(1-(oxetan-3- yl)-1H-1,2,3-triazol-4- yl)methyl)amino)quinoline-3- carbonitrile::US11066414, Compound 217	12	aid1805683	Gilead Sciences, Inc.	134212098
1058788	InChI=1S/C26H20ClF2N9/c27-20-7-16(34-24(14-2-1-5-31-10-14)22-13-38(37-36-22)18-3-4-18)6-19-23(15(9-30)11-32-25(19)20)35-17-8-21(28)26(29)33-12-17/h1-2,5-8,10-13,18,24,34,36-37H,3-4H2,(H,32,35)/t24-/m0/s1	(S)-8-chloro-6-(((1-cyclopropyl-1H- 1,2,3-triazol-4-yl)(pyridin-3- yl)methyl)amino)-4-((5,6- difluoropyridin-3- yl)amino)quinoline-3- carbonitrile::US11066414, Compound 206	3	aid1805683	Gilead Sciences, Inc.	134212096
1058783	InChI=1S/C26H27ClN8O2/c27-22-9-19(8-21-24(17(10-28)12-30-26(21)22)31-18-3-6-36-7-4-18)32-25(16-2-1-5-29-11-16)23-13-35(34-33-23)20-14-37-15-20/h1-2,5,8-9,11-13,18,20,25,32-34H,3-4,6-7,14-15H2,(H,30,31)/t25-/m0/s1	(S)-8-chloro-6-(((1-(oxetan-3-yl)-1H- 1,2,3-triazol-4-yl)(pyridin-3- yl)methyl)amino)-4-((tetrahydro-2H- pyran-4-yl)amino)quinoline-3- carbonitrile::US11066414, Compound 201	56	aid1805683	Gilead Sciences, Inc.	134212091
1058781	InChI=1S/C26H20ClF2N9O/c27-20-5-16(34-24(14-2-1-3-31-8-14)22-11-38(37-36-22)18-12-39-13-18)4-19-23(15(7-30)9-32-25(19)20)35-17-6-21(28)26(29)33-10-17/h1-6,8-11,18,24,34,36-37H,12-13H2,(H,32,35)/t24-/m0/s1	(S)-8-chloro-4-((5,6-difluoropyridin- 3-yl)amino)-6-(((1-(oxetan-3-yl)-1H- 1,2,3-triazol-4-yl)(pyridin-3- yl)methyl)amino)quinoline-3- carbonitrile::US11066414, Compound 199	9	aid1805683	Gilead Sciences, Inc.	134212090
1058780	InChI=1S/C27H24ClF2N9/c1-27(2,3)39-14-22(37-38-39)24(15-5-4-6-32-11-15)35-17-7-19-23(36-18-9-21(29)26(30)34-13-18)16(10-31)12-33-25(19)20(28)8-17/h4-9,11-14,24,35,37-38H,1-3H3,(H,33,36)/t24-/m0/s1	(S)-6-(((1-(tert-butyl)-1H-1,2,3-triazol- 4-yl)(pyridin-3-yl)methyl)amino)-8- chloro-4-((5,6-difluoropyridin-3- yl)amino)quinoline-3-carbonitrile::US11066414, Compound 198	17	aid1805683	Gilead Sciences, Inc.	134212089
1058779	InChI=1S/C26H21ClF3N9/c1-14(8-28)39-13-22(37-38-39)24(15-3-2-4-32-10-15)35-17-5-19-23(36-18-7-21(29)26(30)34-12-18)16(9-31)11-33-25(19)20(27)6-17/h2-7,10-14,24,35,37-38H,8H2,1H3,(H,33,36)/t14-,24-/m0/s1	8-chloro-4-((5,6-difluoropyridin-3- yl)amino)-6-(((S)-(1-((S)-1- fluoropropan-2-yl)-1H-1,2,3-triazol- 4-yl)(pyridin-3- yl)methyl)amino)quinoline-3- carbonitrile::US11066414, Compound 197	9	aid1805683	Gilead Sciences, Inc.	134212088
1058773	InChI=1S/C30H29ClN8/c1-2-26(19-7-4-3-5-8-19)36-28-21(15-32)17-34-30-24(28)13-22(14-25(30)31)35-29(20-9-6-12-33-16-20)27-18-39(38-37-27)23-10-11-23/h3-9,12-14,16-18,23,26,29,35,37-38H,2,10-11H2,1H3,(H,34,36)/t26-,29+/m1/s1	8-chloro-6-(((S)-(1-cyclopropyl-1H- 1,2,3-triazol-4-yl)(pyridin-3- yl)methyl)amino)-4-(((R)-1- phenylpropyl)amino)quinoline-3- carbonitrile::US11066414, Compound 191	2	aid1805683	Gilead Sciences, Inc.	134212087
1058772	InChI=1S/C30H28ClF3N8/c1-3-25(19-8-5-4-6-9-19)39-27-21(14-35)16-37-29-23(27)12-22(13-24(29)31)38-28(20-10-7-11-36-15-20)26-17-42(41-40-26)18(2)30(32,33)34/h4-13,15-18,25,28,38,40-41H,3H2,1-2H3,(H,37,39)/t18?,25-,28+/m1/s1	8-chloro-4-(((R)-1- phenylpropyl)amino)-6-(((S)-pyridin- 3-yl (1-((R)-1,1,1-trifluoropropan-2- yl)-1H-1,2,3-triazol-4- yl)methyl)amino)quinoline-3- carbonitrile::US11066414, Compound 190	9	aid1805683	Gilead Sciences, Inc.	134212086
1058769	InChI=1S/C31H33ClN8O/c1-19(2)40-18-26(38-39-40)28(21-11-8-12-34-16-21)36-23-13-24-27(22(15-33)17-35-29(24)25(32)14-23)37-30(31(3,4)41)20-9-6-5-7-10-20/h5-14,16-19,28,30,36,38-39,41H,1-4H3,(H,35,37)/t28-,30-/m0/s1	8-chloro-4-(((S)-2-hydroxy-2-methyl- 1-phenylpropyl)amino)-6-(((S)-(1- isopropyl-1H-1,2,3-triazol-4- yl)(pyridin-3-yl)methyl)amino)- quinoline-3-carbonitrile::US11066414, Compound 187	67	aid1805683	Gilead Sciences, Inc.	134212084
1058750	InChI=1S/C26H29ClN8O/c1-26(2,3)15-31-23-17(9-28)11-30-25-20(23)7-18(8-21(25)27)32-24(16-5-4-6-29-10-16)22-12-35(34-33-22)19-13-36-14-19/h4-8,10-12,19,24,32-34H,13-15H2,1-3H3,(H,30,31)/t24-/m0/s1	(S)-8-chloro-4-(neopentylamino)-6- (((1-(oxetan-3-yl)-1H-1,2,3-triazol- 4-yl)(pyridin-3- yl)methyl)amino)quinoline-3- carbonitrile::US11066414, Compound 168	6	aid1805683	Gilead Sciences, Inc.	134212083
1058748	InChI=1S/C23H15ClF3N9/c24-16-4-13(33-21(18-10-32-36-35-18)11-1-2-19(26)29-7-11)3-15-20(12(6-28)8-30-22(15)16)34-14-5-17(25)23(27)31-9-14/h1-5,7-10,21,32-33,35-36H,(H,30,34)/t21-/m0/s1	(S)-8-chloro-4-((5,6-difluoropyridin-3- yl)amino)-6-(((6-fluoropyridin-3- yl)(1H-1,2,3-triazol-4- yl)methyl)amino)quinoline-3- carbonitrile::US11066414, Compound 166	6	aid1805683	Gilead Sciences, Inc.	134212082
1058747	InChI=1S/C22H17ClF2N10/c1-35-18(2-3-30-35)21(17-10-29-34-33-17)31-12-4-14-19(32-13-6-16(24)22(25)28-9-13)11(7-26)8-27-20(14)15(23)5-12/h2-6,8-10,21,29,31,33-34H,1H3,(H,27,32)/t21-/m1/s1	(S)-8-chloro-4-((5,6-difluoropyridin-3- yl)amino)-6-(((1-methyl-1H-pyrazol-5- yl)(1H-1,2,3-triazol-4- yl)methyl)amino)quinoline-3- carbonitrile::US11066414, Compound 165	9	aid1805683	Gilead Sciences, Inc.	134212081
1058742	InChI=1S/C29H20ClF2N9/c30-23-10-19(9-22-26(18(12-33)14-35-28(22)23)38-20-11-24(31)29(32)36-15-20)37-27(17-5-4-8-34-13-17)25-16-41(40-39-25)21-6-2-1-3-7-21/h1-11,13-16,27,37,39-40H,(H,35,38)/t27-/m0/s1	(S)-8-chloro-4-((5,6-difluoropyridin-3- yl)amino)-6-(((1-phenyl-1H-1,2,3- triazol-4-yl)(pyridin-3- yl)methyl)amino)quinoline-3- carbonitrile::US11066414, Compound 160	11	aid1805683	Gilead Sciences, Inc.	134212079
1058740	InChI=1S/C29H24Cl2FN9/c1-16(2)41-15-25(38-39-41)29(20-4-3-9-40-26(20)7-8-35-40)37-19-10-21-27(36-18-5-6-24(32)22(30)11-18)17(13-33)14-34-28(21)23(31)12-19/h3-12,14-16,29,37-39H,1-2H3,(H,34,36)/t29-/m0/s1	(S)-8-chloro-4-((3-chloro-4- fluorophenyl)amino)-6-(((1-isopropyl- 1H-1,2,3-triazol-4-yl)(pyrazolo[1,5- a]pyridin-4-yl)methyl)amino)- quinoline-3-carbonitrile::US11066414, Compound 157	5	aid1805683	Gilead Sciences, Inc.	134212077
1058725	InChI=1S/C31H25ClFN9/c32-25-14-22(38-30(20-8-11-28(33)36-16-20)27-18-42(41-40-27)23-9-10-23)13-24-29(21(15-35)17-37-31(24)25)39-26(7-4-12-34)19-5-2-1-3-6-19/h1-3,5-6,8,11,13-14,16-18,23,26,30,38H,4,7,9-10H2,(H,37,39)	(S)-8-chloro-6-(((1-cyclopropyl-1H- 1,2,3-triazol-4-yl)(6-fluoropyridin-3- yl)methyl-d)amino)-4- (neopentylamino)quinoline-3- carbonitrile::US11066414, Compound 142	2	aid1805683	Gilead Sciences, Inc.	134212028
1058720	InChI=1S/C31H27ClFN9/c32-25-14-22(38-30(20-8-11-28(33)36-16-20)27-18-42(41-40-27)23-9-10-23)13-24-29(21(15-35)17-37-31(24)25)39-26(7-4-12-34)19-5-2-1-3-6-19/h1-3,5-6,8,11,13-14,16-18,23,26,30,38,40-41H,4,7,9-10H2,(H,37,39)/t26-,30?/m0/s1	(S)-6-(((1-(1-(tert-butyl)piperidin-4-yl)- 1H-1,2,3-triazol-4-yl)(5-methylthiazol- 4-yl)methyl)amino)-8-chloro-4-((3- chloro-4-fluorophenyl)amino)quinoline- 3-carbonitrile::US11066414, Compound 137	15	aid1805683	Gilead Sciences, Inc.	134212026
1058721	InChI=1S/C31H27ClFN9/c32-25-14-22(38-30(20-8-11-28(33)36-16-20)27-18-42(41-40-27)23-9-10-23)13-24-29(21(15-35)17-37-31(24)25)39-26(7-4-12-34)19-5-2-1-3-6-19/h1-3,5-6,8,11,13-14,16-18,23,26,30,38,40-41H,4,7,9-10H2,(H,37,39)/t26-,30?/m1/s1	(S)-8-chloro-4-(neopentylamino)-6- ((pyridin-3-yl(1-(pyridin-3-yl)-1H-1,2,3- triazol-4-yl)methyl-d)amino)quinoline- 3-carbonitrile::US11066414, Compound 138	3	aid1805683	Gilead Sciences, Inc.	134212024
1058660	InChI=1S/C31H33N9O/c1-31(2,3)17-35-28-20(13-33)14-34-27-19(12-32)10-21(11-24(27)28)36-29(25-16-40(38-37-25)22-8-9-22)23-7-5-6-18-15-39(4)30(41)26(18)23/h5-7,10-11,14,16,22,29,36-38H,8-9,15,17H2,1-4H3,(H,34,35)/t29-/m0/s1	(S)-6-(((1-cyclopropyl-1H-1,2,3- triazol-4-yl)(2-methyl-3- oxoisoindolin-4-yl)methyl)amino)-4- (neopentylamino)quinoline- 3,8-dicarbonitrile::US11066414, Compound 77	3	aid1805683	Gilead Sciences, Inc.	134212022
1058657	InChI=1S/C32H30ClN9/c1-20-25(9-6-14-36-20)32(29-19-42(41-40-29)24-11-12-24)38-23-15-26-30(22(17-35)18-37-31(26)27(33)16-23)39-28(10-5-13-34)21-7-3-2-4-8-21/h2-4,6-9,14-16,18-19,24,28,32,38,40-41H,5,10-12H2,1H3,(H,37,39)/t28-,32+/m1/s1	8-chloro-4-(((R)-3-cyano-1- phenylpropyl)amino)- 6-(((S)-(1-cyclopropyl-1H- 1,2,3-triazol-4-yl)(2- methylpyridin-3-yl)methyl)amino)- quinoline-3-carbonitrile::US11066414, Compound 74	1	aid1805683	Gilead Sciences, Inc.	134212021
1058653	InChI=1S/C28H30BrN9S/c1-28(2,3)14-33-23-15(11-30)12-32-24-19(23)9-16(10-20(24)29)34-25(22-13-38(37-36-22)17-7-8-17)18-5-4-6-21-26(18)39-27(31)35-21/h4-6,9-10,12-13,17,25,34,36-37H,7-8,14H2,1-3H3,(H2,31,35)(H,32,33)/t25-/m0/s1	(S)-6-(((2-aminobenzo[d]thiazol-7- yl)(1-cyclopropyl-1H-1,2,3-triazol- 4-yl)methyl)amino)-8-bromo-4- (neopentylamino)quinoline-3- carbonitrile::US11066414, Compound 70	19	aid1805683	Gilead Sciences, Inc.	134212018
1058650	InChI=1S/C30H28N10S/c1-29(2,3)16-35-26-19(12-32)13-34-25-18(11-31)9-20(10-22(25)26)37-27(21-5-4-6-23-28(21)41-17-36-23)24-14-40(39-38-24)30(15-33)7-8-30/h4-6,9-10,13-14,17,27,37-39H,7-8,16H2,1-3H3,(H,34,35)/t27-/m0/s1	(S)-6-((benzo[d]thiazol-7-yl(1-(1- cyanocyclopropyl)-1H-1,2,3-triazol- 4-yl)methyl)amino)-4- (neopentylamino)quinoline- 3,8-dicarbonitrile::US11066414, Compound 67	1	aid1805683	Gilead Sciences, Inc.	134212017
1058588	InChI=1S/C31H31ClN8O2/c1-2-26(20-7-4-3-5-8-20)37-28-22(13-33)15-35-30-24(28)11-23(12-25(30)32)36-29(21-9-6-10-34-14-21)27-16-40(39-38-27)17-31(41)18-42-19-31/h3-12,14-16,26,29,36,38-39,41H,2,17-19H2,1H3,(H,35,37)/t26-,29+/m1/s1	8-chloro-6-(((S)-(1-((3- hydroxyoxetan-3-yl)methyl)-1H- 1,2,3-triazol-4-yl)(pyridin-3- yl)methyl)amino)-4-(((R)-1- phenylpropyl)amino)quinoline-3- carbonitrile::US11066414, Compound 4	2	aid1805683	Gilead Sciences, Inc.	134212012
1058587	InChI=1S/C30H27ClF2N8/c1-2-24(17-6-4-3-5-7-17)37-27-18(14-34)15-35-28-22(27)12-19(13-23(28)31)36-29(21-10-11-26(32)38-30(21)33)25-16-41(40-39-25)20-8-9-20/h3-7,10-13,15-16,20,24,29,36,39-40H,2,8-9H2,1H3,(H,35,37)/t24-,29+/m1/s1	8-chloro-6-(((1-cyclopropyl-1H- 1,2,3-triazol-4-yl)(2,6- difluoropyridin-3-yl)methyl- d)amino)-4-(((R)-1- phenylpropyl)amino)quinoline-3- carbonitrile::US11066414, Compound 3	8	aid1805683	Gilead Sciences, Inc.	134212011
1058829	InChI=1S/C34H34Cl2FN9/c1-20-24(7-6-12-39-20)33(29-19-46(44-43-29)23-10-13-45(14-11-23)34(2,3)4)41-22-15-25-31(42-28-9-5-8-26(35)30(28)37)21(17-38)18-40-32(25)27(36)16-22/h5-9,12,15-16,18-19,23,33,41H,10-11,13-14H2,1-4H3,(H,40,42)/t33-/m0/s1	(S)-6-(((1-(1-(tert-butyl)piperidin-4-yl)- 1H-1,2,3-triazol-4-yl)(2-methylpyridin- 3-yl)methyl)amino)-8-chloro-4-((3- chloro-2-fluorophenyl)amino)quinoline- 3-carbonitrile::US11066414, Compound 247	2	aid1805683	Gilead Sciences, Inc.	134196233
1058715	InChI=1S/C36H36ClN9OS/c37-30-14-24(13-28-34(23(15-39)16-40-35(28)30)42-31(7-4-11-38)22-5-2-1-3-6-22)41-36(32-17-46(44-43-32)25-8-9-25)29-21-48-33-18-45(12-10-27(29)33)26-19-47-20-26/h1-3,5-6,13-14,16-17,21,25-26,31,36,41,43-44H,4,7-10,12,18-20H2,(H,40,42)/t31?,36-/m1/s1	8-chloro-6-(((1-cyclopropyl-1H-1,2,3- triazol-4-yl)(2-methylpyridin-3- yl)methyl-d)amino)-4- (neopentylamino)quinoline-3- carbonitrile::US11066414, Compound 132	4	aid1805683	Gilead Sciences, Inc.	129179168
1059292	InChI=1S/C33H35ClN8O/c1-32(2,3)18-37-28-20(15-35)16-36-29-25(28)10-21(11-26(29)34)38-30(27-17-42(40-39-27)33-12-19(13-33)14-33)23-6-5-7-24-22(23)8-9-41(4)31(24)43/h5-11,16-17,19,30,38-40H,12-14,18H2,1-4H3,(H,36,37)/t19?,30-,33?/m0/s1	(S)-6-(((1-(bicyclo[1.1.1]pentan- 1-yl)-1H-1,2,3- triazol-4-yl)(2-(methyl-d3)-1-oxo-1,2- dihydroisoquinolin-5- yl)methyl)amino)-8-chloro- 4-(neopentylamino)quinoline- 3-carbonitrile::US11066414, Compound 711::US11066414, Compound 713	2	aid1805683	Gilead Sciences, Inc.	129174766
1058954	InChI=1S/C25H17Cl2FN8/c1-36-13-22(34-35-36)24(14-3-2-6-30-11-14)33-17-7-18-23(32-16-4-5-21(28)19(26)8-16)15(10-29)12-31-25(18)20(27)9-17/h2-9,11-13,24,33H,1H3,(H,31,32)/t24-/m0/s1	(S)-8-chloro-4-((3-chloro-4-fluoro- phenyl)amino)-6-(((1-methyl-1H- 1,2,3-triazol-4-yl)(pyridin-3-yl)- methyl)amino)quinoline-3-carbonitrile::US11066414, Compound 406	3	aid1805683	Gilead Sciences, Inc.	124190048
1059024	InChI=1S/C30H31ClN8/c1-30(2,3)17-35-27-19(13-32)15-34-28-24(27)11-20(12-25(28)31)36-29(26-16-39(38-37-26)21-7-8-21)23-6-4-5-18-14-33-10-9-22(18)23/h4-6,9-12,14-16,21,29,36-38H,7-8,17H2,1-3H3,(H,34,35)/t29-/m0/s1	(S)-8-chloro-6-(((1-cyclopropyl-1H-1,2,3- triazol-4-yl)(isoquinolin-5- yl)methyl)amino)- 4-(neopentylamino)quinoline- 3-carbonitrile::US11066414, Compound 443	1	aid1805683	Gilead Sciences, Inc.	124181820
1059559	InChI=1S/C27H30ClFN8O/c1-15-18(6-7-21(29)33-15)24(25-26-37(36-35-25)8-5-9-38-26)34-17-10-19-22(32-14-27(2,3)4)16(12-30)13-31-23(19)20(28)11-17/h6-7,10-11,13,24,34-36H,5,8-9,14H2,1-4H3,(H,31,32)/t24-/m0/s1	(S)-8-chloro-6-(((6,7-dihydro-5H- [1,2,3]triazolo[5,l-b][1,3]oxazin-3-yl)(6- fluoro-2-methylpyridin-3- yl)methyl)amino)-4- (neopentylamino)quinoline-3-carbonitrile::US11066414, Compound 985	13	aid1805683	Gilead Sciences, Inc.	124181812
1059558	InChI=1S/C28H32ClFN8/c1-16-19(8-9-23(30)34-16)26(27-22-7-5-6-10-38(22)37-36-27)35-18-11-20-24(33-15-28(2,3)4)17(13-31)14-32-25(20)21(29)12-18/h8-9,11-12,14,26,35-37H,5-7,10,15H2,1-4H3,(H,32,33)/t26-/m0/s1	(S)-8-chloro-6-(((6-fluoro-2-methylpyridin- 3-yl)(4,5,6,7-tetrahydro-[1,2,3]triazolo[1,5- a]pyridin-3-yl)methyl)amino)-4- (neopentylamino)quinoline-3-carbonitrile::US11066414, Compound 984	10	aid1805683	Gilead Sciences, Inc.	124181810
1059555	InChI=1S/C30H33F3N8O/c1-16-20(6-7-24(31)37-16)27(23-14-41(40-39-23)30(8-9-30)28(32)33)38-19-10-21(17(2)42)26-22(11-19)25(18(12-34)13-35-26)36-15-29(3,4)5/h6-7,10-11,13-14,27-28,38-40H,8-9,15H2,1-5H3,(H,35,36)/t27-/m0/s1	(S)-8-acetyl-6-(((1-(1- (difluoromethyl)cyclopropyl)-1H-1,2,3- triazol-4-yl)(6-fluoro-2-methylpyridin-3- yl)methyl)amino)-4- (neopentylamino)quinoline-3-carbonitrile::US11066414, Compound 981	4	aid1805683	Gilead Sciences, Inc.	124181809
1059552	InChI=1S/C29H32ClF3N8O/c1-16-19(6-7-23(37-16)42-5)26(22-14-41(40-39-22)28(8-9-28)29(31,32)33)38-18-10-20-24(36-15-27(2,3)4)17(12-34)13-35-25(20)21(30)11-18/h6-7,10-11,13-14,26,38-40H,8-9,15H2,1-5H3,(H,35,36)	8-chloro-6-(((6-methoxy-2-methylpyridin- 3-yl)(1-(1-(trifluoromethyl)cyclopropyl)- 1H-1,2,3-triazol-4-yl)methyl)amino)-4- (neopentylamino)quinoline-3-carbonitrile::US11066414, Compound 978	9	aid1805683	Gilead Sciences, Inc.	124181804
1059551	InChI=1S/C32H33F3N10/c1-18-22(5-6-26(33)41-18)29(25-15-45(44-43-25)32(7-8-32)30(34)35)42-21-9-23(20-12-37-17-38-13-20)28-24(10-21)27(19(11-36)14-39-28)40-16-31(2,3)4/h5-6,9-10,12-15,17,29-30,42-44H,7-8,16H2,1-4H3,(H,39,40)/t29-/m0/s1	(S)-6-(((4-(1-(1- (difluoromethyl)cyclopropyl)- 1H-1,2,3-triazol-4-yl)(6-fluoro-2- methylpyridin-3-yl)methyl)amino)-4- (neopentylamino)-8-(pyrimidin-5- yl)quinoline-3-carbonitrile::US11066414, Compound 976	21	aid1805683	Gilead Sciences, Inc.	124181803
1059549	InChI=1S/C29H29ClF3N9/c1-15-18(5-6-22(31)38-15)25(26-21(12-35)42(41-40-26)29(7-8-29)27(32)33)39-17-9-19-23(37-14-28(2,3)4)16(11-34)13-36-24(19)20(30)10-17/h5-6,9-10,13,25,27,39-41H,7-8,14H2,1-4H3,(H,36,37)/t25-/m0/s1	(S)-8-chloro-6-(((5-cyano-1-(1- (difluoromethyl)cyclopropyl)-1H-1,2,3- triazol-4-yl)(6-fluoro-2-methylpyridin-3- yl)methyl)amino)-4- (neopentylamino)quinoline-3-carbonitrile::US11066414, Compound 974	11	aid1805683	Gilead Sciences, Inc.	124181800
1059533	InChI=1S/C27H26ClF5N8/c1-13-17(6-7-20(29)37-13)23(24-25(30)41(40-39-24)16-4-5-16)38-15-8-18-21(36-12-26(2,3)27(31,32)33)14(10-34)11-35-22(18)19(28)9-15/h6-9,11,16,23,38-40H,4-5,12H2,1-3H3,(H,35,36)/t23-/m0/s1	(S)-8-chloro-6-(((1-cyclopropyl-5-fluoro- 1H-1,2,3-triazol-4-yl)(6-fluoro-2- methylpyridin-3-yl)methyl)amino)-4- ((3,3,3-trifluoro-2,2- dimethylpropyl)amino)quinoline-3- carbonitrile::US11066414, Compound 958	2	aid1805683	Gilead Sciences, Inc.	124181799
1059527	InChI=1S/C27H30ClF3N8/c1-14(10-29)39-26(31)25(37-38-39)24(18-6-7-21(30)35-15(18)2)36-17-8-19-22(34-13-27(3,4)5)16(11-32)12-33-23(19)20(28)9-17/h6-9,12,14,24,36-38H,10,13H2,1-5H3,(H,33,34)/t14-,24-/m0/s1	8-chloro-6-(((S)-(5-fluoro-1-((S)-1- fluoropropan-2-yl)-1H-1,2,3-triazol-4- yl)(6-fluoro-2-methylpyridin-3- yl)methyl)amino)-4- (neopentylamino)quinoline-3- carbonitrile::US11066414, Compound 952	4	aid1805683	Gilead Sciences, Inc.	124181798
1059544	InChI=1S/C26H30ClFN8O/c1-14-17(7-8-20(28)32-14)23(24-25(37-6)36(5)35-34-24)33-16-9-18-21(31-13-26(2,3)4)15(11-29)12-30-22(18)19(27)10-16/h7-10,12,23,33-35H,13H2,1-6H3,(H,30,31)/t23-/m0/s1	(S)-8-chloro-6-(((6-fluoro-2-methylpyridin- 3-yl)(5-methoxy-1-methyl-1H-1,2,3-triazol- 4-yl)methyl)amino)-4- (neopentylamino)quinoline-3-carbonitrile::US11066414, Compound 969	8	aid1805683	Gilead Sciences, Inc.	124181793
1059535	InChI=1S/C28H29ClF4N8/c1-14-17(5-6-20(30)37-14)23(24-25(31)41(40-39-24)28(7-8-28)26(32)33)38-16-9-18-21(36-13-27(2,3)4)15(11-34)12-35-22(18)19(29)10-16/h5-6,9-10,12,23,26,38-40H,7-8,13H2,1-4H3,(H,35,36)/t23-/m0/s1	(S)-8-chloro-6-(((1-(1- (difluoromethyl)cyclopropyl)-5-fluoro-1H- 1,2,3-triazol-4-yl)(6-fluoro-2- methylpyridin-3-yl)methyl)amino)-4- (neopentylamino)quinoline-3-carbonitrile::US11066414, Compound 960	7	aid1805683	Gilead Sciences, Inc.	124181791
1059532	InChI=1S/C30H30ClF5N8/c1-15-19(6-7-22(32)40-15)25(26-27(33)44(43-42-26)29(8-9-29)17-4-5-17)41-18-10-20-23(39-14-28(2,3)30(34,35)36)16(12-37)13-38-24(20)21(31)11-18/h6-7,10-11,13,17,25,41-43H,4-5,8-9,14H2,1-3H3,(H,38,39)/t25-/m0/s1	(S)-6-(((1-([1,1'-bicyclopropan)]-1-yl)- 5-fluoro-1H-1,2,3-triazol-4-yl)(6-fluoro- 2-methylpyridin-3-yl)methyl)amino)-8- chloro-4-((3,3,3-trifluoro-2,2- dimethylpropyl)amino)quinoline-3- carbonitrile::US11066414, Compound 957	5	aid1805683	Gilead Sciences, Inc.	124181790
1059536	InChI=1S/C33H34ClFN8O/c1-32(2,3)17-38-26-19(15-36)16-37-27-24(26)10-20(11-25(27)34)39-28(22-6-5-7-23-21(22)8-9-42(4)31(23)44)29-30(35)43(41-40-29)33-12-18(13-33)14-33/h5-11,16,18,28,39-41H,12-14,17H2,1-4H3,(H,37,38)/t18?,28-,33?/m0/s1	(S)-6-(((1-(bicyclo[111]pentan-1-yl)-5- fluoro-1H-1,2,3-triazol-4-yl)(2-methyl-1- oxo-1,2-dihydroisoquinolin-5- yl)methyl)amino)-8-chloro-4- (neopentylamino)quinoline-3-carbonitrile::US11066414, Compound 961	3	aid1805683	Gilead Sciences, Inc.	124181788
1059534	InChI=1S/C28H28ClF5N8/c1-14-17(5-6-20(30)38-14)23(24-25(31)42(41-40-24)27(4)7-8-27)39-16-9-18-21(37-13-26(2,3)28(32,33)34)15(11-35)12-36-22(18)19(29)10-16/h5-6,9-10,12,23,39-41H,7-8,13H2,1-4H3,(H,36,37)/t23-/m0/s1	(S)-8-chloro-6-(((5-fluoro-1-(1- methylcyclopropyl)-1H-1,2,3-triazol-4- yl)(6-fluoro-2-methylpyridin-3- yl)methyl)amino)-4-((3,3,3-trifluoro- 2,2-dimethylpropyl)amino)quinoline- 3-carbonitrile::US11066414, Compound 959	3	aid1805683	Gilead Sciences, Inc.	124181787
1059530	InChI=1S/C27H27ClF6N8/c1-13(9-29)42-25(31)24(40-41-42)23(17-5-6-20(30)38-14(17)2)39-16-7-18-21(37-12-26(3,4)27(32,33)34)15(10-35)11-36-22(18)19(28)8-16/h5-8,11,13,23,39-41H,9,12H2,1-4H3,(H,36,37)/t13-,23-/m0/s1	8-chloro-6-(((S)-(5-fluoro-1-((S)-1- fluoropropan-2-yl)-1H-1,2,3-triazol-4- yl)(6-fluoro-2-methylpyridin-3- yl)methyl)amino)-4-((3,3,3-trifluoro- 2,2-dimethylpropyl)amino)quinoline- 3-carbonitrile::US11066414, Compound 955	6	aid1805683	Gilead Sciences, Inc.	124181785
1059529	InChI=1S/C30H31F2N9/c1-16-21(5-6-23(31)37-16)26(27-28(32)41(40-39-27)30-9-17(10-30)11-30)38-20-7-18(12-33)24-22(8-20)25(19(13-34)14-35-24)36-15-29(2,3)4/h5-8,14,17,26,38-40H,9-11,15H2,1-4H3,(H,35,36)/t17?,26-,30?/m0/s1	(S)-6-(((1-(bicyclo[1.1.1]pentan-1-yl)- 5-fluoro-1H-1,2,3-triazol-4-yl)(6- fluoro-2-methylpyridin-3- yl)methyl)amino)-4- (neopentylamino)quinoline-3,8- dicarbonitrile::US11066414, Compound 954	7	aid1805683	Gilead Sciences, Inc.	124181784
1059528	InChI=1S/C28H20ClF6N9/c1-12-16(2-3-20(31)39-12)23(24-26(33)44(43-42-24)28(4-5-28)27(34)35)40-14-6-17-21(41-15-8-19(30)25(32)38-11-15)13(9-36)10-37-22(17)18(29)7-14/h2-3,6-8,10-11,23,27,40,42-43H,4-5H2,1H3,(H,37,41)/t23-/m0/s1	(S)-8-chloro-6-(((1-(1- (difluoromethyl)cyclopropyl)-5-fluoro- 1H-1,2,3-triazol-4-yl)(6-fluoro-2- methylpyridin-3-yl)methyl)amino)-4- ((5,6-difluoropyridin-3- yl)amino)quinoline-3-carbonitrile::US11066414, Compound 953	36	aid1805683	Gilead Sciences, Inc.	124181783
1059526	InChI=1S/C29H31ClF2N8/c1-15-19(5-6-22(31)36-15)25(26-27(32)40(39-38-26)29-9-16(10-29)11-29)37-18-7-20-23(35-14-28(2,3)4)17(12-33)13-34-24(20)21(30)8-18/h5-8,13,16,25,37-39H,9-11,14H2,1-4H3,(H,34,35)/t16?,25-,29?/m0/s1	(S)-6-(((1-(bicyclo[1.1.1]pentan-1-yl)- 5-fluoro-1H-1,2,3-triazol-4-yl)(6- fluoro-2-methylpyridin-3- yl)methyl)amino)-8-chloro-4- (neopentylamino)quinoline-3- carbonitrile::US11066414, Compound 951	9	aid1805683	Gilead Sciences, Inc.	124181782
1059525	InChI=1S/C32H28ClF5N8/c1-3-24(18-7-5-4-6-8-18)43-26-19(15-39)16-40-27-22(26)13-20(14-23(27)33)42-28(21-9-10-25(34)41-17(21)2)29-30(35)46(45-44-29)31(11-12-31)32(36,37)38/h4-10,13-14,16,24,28,42,44-45H,3,11-12H2,1-2H3,(H,40,43)/t24-,28+/m1/s1	8-chloro-6-(((S)-(5-fluoro-1-(1- (trifluoromethyl)cyclopropyl)-1H- 1,2,3-triazol-4-yl)(6-fluoro-2- methylpyridin-3-yl)methyl)amino)-4- (((R)-1-phenylpropyl)amino)quinoline- 3-carbonitrile::US11066414, Compound 950	17	aid1805683	Gilead Sciences, Inc.	124181781
1059524	InChI=1S/C30H33ClF2N8/c1-16-20(7-8-23(32)37-16)26(27-28(33)41(40-39-27)30(9-10-30)18-5-6-18)38-19-11-21-24(36-15-29(2,3)4)17(13-34)14-35-25(21)22(31)12-19/h7-8,11-12,14,18,26,38-40H,5-6,9-10,15H2,1-4H3,(H,35,36)/t26-/m0/s1	(S)-6-(((1-([1,1'-bi(cyclopropan)]-1-yl)- 5-fluoro-1H-1,2,3-triazol-4-yl)(6- fluoro-2-methylpyridin-3- yl)methyl)amino)-8-chloro-4- (neopentylamino)quinoline-3- carbonitrile::US11066414, Compound 949	4	aid1805683	Gilead Sciences, Inc.	124181780
1059522	InChI=1S/C28H31ClF2N8/c1-15-18(6-7-21(30)35-15)24(25-26(31)39(38-37-25)28(5)8-9-28)36-17-10-19-22(34-14-27(2,3)4)16(12-32)13-33-23(19)20(29)11-17/h6-7,10-11,13,24,36-38H,8-9,14H2,1-5H3,(H,33,34)/t24-/m0/s1	(S)-8-chloro-6-(((5-fluoro-1-(1- methylcyclopropyl)-1H-1,2,3- triazol-4-yl)(6-fluoro-2-methyl- pyridin-3-yl)methyl)amino)-4- (neopentylamino)quinoline-3- carbonitrile::US11066414, Compound 947	3	aid1805683	Gilead Sciences, Inc.	124181778
1059514	InChI=1S/C28H30ClF3N8O/c1-26(2,3)15-35-22-16(12-33)13-34-23-19(22)10-17(11-20(23)29)36-24(18-6-5-9-39(4)25(18)41)21-14-40(38-37-21)27(7-8-27)28(30,31)32/h5-6,9-11,13-14,24,36-38H,7-8,15H2,1-4H3,(H,34,35)/t24-/m0/s1	(S)-8-chloro-6-(((1-methyl-2-oxo-1,2- dihydropyridin-3-yl)(1-(1- (trifluoromethyl)cyclopropyl)-1H-1,2,3- triazol-4-yl)methyl)amino)-4- (neopentylamino)quinoline-3-carbonitrile::US11066414, Compound 936	18	aid1805683	Gilead Sciences, Inc.	124181768
1059512	InChI=1S/C32H30ClF5N8O/c1-30(2,32(36,37)38)16-42-25-17(13-39)14-41-26-22(25)11-18(12-23(26)33)43-27(24-15-46(45-44-24)31(8-9-31)29(34)35)20-5-4-6-21-19(20)7-10-40-28(21)47-3/h4-7,10-12,14-15,27,29,43-45H,8-9,16H2,1-3H3,(H,41,42)/t27-/m0/s1	(S)-8-chloro-6-(((1-(1- (difluoromethyl)cyclopropyl)-1H-1,2,3- triazol-4-yl)(1-methoxylsoquinolin-5- yl)methyl)amino)-4-((3,3,3-trifluoro-2,2- dimethylpropyl)amino)quinoline-3- carbonitrile::US11066414, Compound 934	7	aid1805683	Gilead Sciences, Inc.	124181765
1059510	InChI=1S/C31H34ClFN8O/c1-18(13-33)41-16-26(39-40-41)29(22-7-6-8-23-21(22)9-10-35-30(23)42-5)38-20-11-24-27(37-17-31(2,3)4)19(14-34)15-36-28(24)25(32)12-20/h6-12,15-16,18,29,38-40H,13,17H2,1-5H3,(H,36,37)/t18-,29-/m0/s1	8-chloro-6-(((S)-(1-((S)-1-fluoropropan-2- yl)-1H-1,2,3-triazol-4-yl)(1- methoxylsoquinolin-5-yl)methyl)amino)-4- (neopentylamino)quinoline-3-carbonitrile::US11066414, Compound 932	14	aid1805683	Gilead Sciences, Inc.	124181763
1059507	InChI=1S/C32H32ClF3N8O/c1-30(2,3)17-40-26-18(14-37)15-39-27-23(26)12-19(13-24(27)33)41-28(21-6-5-7-22-20(21)8-11-38-29(22)45-4)25-16-44(43-42-25)31(9-10-31)32(34,35)36/h5-8,11-13,15-16,28,41-43H,9-10,17H2,1-4H3,(H,39,40)/t28-/m0/s1	(S)-8-chloro-6-(((1-methoxylsoquinolin-5- yl)(1-(1-(trifluoromethyl)cyclopropyl)-1H- 1,2,3-triazol-4-yl)methyl)amino)-4- (neopentylamino)quinoline-3-carbonitrile::US11066414, Compound 929	11	aid1805683	Gilead Sciences, Inc.	124181762
1059509	InChI=1S/C34H37ClN8O/c1-33(2,3)19-39-29-20(16-36)17-38-30-26(29)14-22(15-27(30)35)40-31(24-6-5-7-25-23(24)10-13-37-32(25)44-4)28-18-43(42-41-28)34(11-12-34)21-8-9-21/h5-7,10,13-15,17-18,21,31,40-42H,8-9,11-12,19H2,1-4H3,(H,38,39)/t31-/m0/s1	(S)-6-(((1-(1,1'-bi(cyclopropan)]-1-yl)-1H- 1,2,3-triazol-4-yl)(1-methoxylsoquinolin- 5-yl)methyl)amino)-8-chloro-4- (neopentylamino)quinoline-3-carbonitrile::US11066414, Compound 931	10	aid1805683	Gilead Sciences, Inc.	124181761
1059506	InChI=1S/C33H32ClF3N8O/c1-31(2,33(35,36)37)17-41-27-19(14-38)15-40-28-24(27)9-20(10-25(28)34)42-29(26-16-45(44-43-26)32-11-18(12-32)13-32)22-5-4-6-23-21(22)7-8-39-30(23)46-3/h4-10,15-16,18,29,42-44H,11-13,17H2,1-3H3,(H,40,41)/t18?,29-,32?/m0/s1	(S)-6-(((1-(bicyclo[1.1.1]pentan-1-yl)-1H- 1,2,3-triazol-4-yl)(1-methoxylsoquinolin- 5-yl)methyl)amino)-8-chloro-4-((3,3,3- trifluoro-2,2-dimethylpropyl)amino)quinoline- 3-carbonitrile::US11066414, Compound 928	6	aid1805683	Gilead Sciences, Inc.	124181760
1059505	InChI=1S/C32H32ClF3N8O/c1-30(2,32(34,35)36)17-40-26-18(14-37)15-39-27-23(26)12-19(13-24(27)33)41-28(25-16-44(43-42-25)31(3)9-10-31)21-6-5-7-22-20(21)8-11-38-29(22)45-4/h5-8,11-13,15-16,28,41-43H,9-10,17H2,1-4H3,(H,39,40)/t28-/m0/s1	(S)-8-chloro-6-(((1-methoxylsoquinolin-5- yl)(1-(1-methylcyclopropyl)-1H-1,2,3-triazol- 4-yl)methyl)amino)-4-((3,3,3-trifluoro- 2,2-dimethylpropyl)amino)quinoline-3- carbonitrile::US11066414, Compound 927	6	aid1805683	Gilead Sciences, Inc.	124181759
1059504	InChI=1S/C34H34ClF3N8O/c1-32(2,34(36,37)38)18-42-28-19(15-39)16-41-29-25(28)13-21(14-26(29)35)43-30(23-5-4-6-24-22(23)9-12-40-31(24)47-3)27-17-46(45-44-27)33(10-11-33)20-7-8-20/h4-6,9,12-14,16-17,20,30,43-45H,7-8,10-11,18H2,1-3H3,(H,41,42)/t30-/m0/s1	(S)-6-(((4-(1-(1,1-bi(cyclopropan)]-1-yl)-1H- 1,2,3-triazol-4-yl)(1-methoxylsoquinolin-5- yl)methyl)amino)-8-chloro-4-((3,3,3-trifluoro- 2,2-dimethylpropyl)amino)quinoline-3- carbonitrile::US11066414, Compound 926	13	aid1805683	Gilead Sciences, Inc.	124181758
1059503	InChI=1S/C32H32ClF3N8O/c1-31(2,3)16-40-24-17(14-37)15-39-25-22(24)12-18(13-23(25)33)41-26(20-6-5-7-21-19(20)8-11-38-29(21)45-4)27-28(34)44(43-42-27)32(9-10-32)30(35)36/h5-8,11-13,15,26,30,41-43H,9-10,16H2,1-4H3,(H,39,40)/t26-/m0/s1	(S)-8-chloro-6-(((1-(1- (difluoromethyl)cyclopropyl)-5-fluoro- 1H-1,2,3-triazol-4-yl)(1-methoxylsoquinolin- 5-yl)methyl)amino)-4- (neopentylamino)quinoline-3-carbonitrile::US11066414, Compound 923	16	aid1805683	Gilead Sciences, Inc.	124181755
1059502	InChI=1S/C32H31ClF4N8O/c1-30(2,3)16-41-24-17(14-38)15-40-25-22(24)12-18(13-23(25)33)42-26(20-6-5-7-21-19(20)8-11-39-29(21)46-4)27-28(34)45(44-43-27)31(9-10-31)32(35,36)37/h5-8,11-13,15,26,42-44H,9-10,16H2,1-4H3,(H,40,41)/t26-/m0/s1	(S)-8-chloro-6-(((5-fluoro-1-(1- (trifluoromethyl)cyclopropyl)-1H-1,2,3- triazol-4-yl)(1-methoxylsoquinolin-5- yl)methyl)amino)-4- (neopentylamino)quinoline-3-carbonitrile::US11066414, Compound 922	11	aid1805683	Gilead Sciences, Inc.	124181754
1059499	InChI=1S/C31H29ClF4N8/c1-29(2,31(34,35)36)16-40-25-17(13-37)14-39-26-21(25)11-18(12-22(26)32)41-28(24-15-44(43-42-24)30(3)8-9-30)20-6-7-23(33)27-19(20)5-4-10-38-27/h4-7,10-12,14-15,28,41-43H,8-9,16H2,1-3H3,(H,39,40)/t28-/m0/s1	(S)-8-chloro-6-(((8-fluoroquinolin-5-yl)(1- (1-methylcyclopropyl)-1H-1,2,3-triazol- 4-yl)methyl)amino)-4-((3,3,3-trifluoro- 2,2-dimethylpropyl)amino)quinoline-3- carbonitrile::US11066414, Compound 919	2	aid1805683	Gilead Sciences, Inc.	124181752
1059498	InChI=1S/C31H27ClF6N8/c1-29(2,31(36,37)38)15-42-24-16(12-39)13-41-25-20(24)10-17(11-21(25)32)43-27(19-5-6-22(33)26-18(19)4-3-9-40-26)23-14-46(45-44-23)30(7-8-30)28(34)35/h3-6,9-11,13-14,27-28,43-45H,7-8,15H2,1-2H3,(H,41,42)/t27-/m0/s1	(S)-8-chloro-6-(((1-(1- (difluoromethyl)cyclopropyl)-1H-1,2,3- triazol-4-yl)(8-fluoroquinolin-5- yl)methyl)amino)-4-((3,3,3-trifluoro-2,2- dimethylpropyl)amino)quinoline-3- carbonitrile::US11066414, Compound 918	3	aid1805683	Gilead Sciences, Inc.	124181751
1059496	InChI=1S/C31H29Cl2F3N8/c1-29(2,3)16-40-25-17(13-37)14-39-26-22(25)11-18(12-23(26)32)41-27(20-5-4-6-21-19(20)7-10-38-28(21)33)24-15-44(43-42-24)30(8-9-30)31(34,35)36/h4-7,10-12,14-15,27,41-43H,8-9,16H2,1-3H3,(H,39,40)/t27-/m0/s1	(S)-8-chloro-6-(((1-chloroisoquinolin-5-yl)(1- (1-(trifluoromethyl)cyclopropyl)-1H-1,2,3- triazol-4-yl)methyl)amino)-4- (neopentylamino)quinoline-3-carbonitrile::US11066414, Compound 916	13	aid1805683	Gilead Sciences, Inc.	124181750
1059497	InChI=1S/C32H29ClF4N8/c1-30(2,32(35,36)37)16-41-26-18(13-38)14-40-27-22(26)8-19(9-23(27)33)42-29(21-5-6-24(34)28-20(21)4-3-7-39-28)25-15-45(44-43-25)31-10-17(11-31)12-31/h3-9,14-15,17,29,42-44H,10-12,16H2,1-2H3,(H,40,41)/t17?,29-,31?/m0/s1	(S)-6-(((1-(bicyclo[1.1.1]pentan-1-yl)-1H-1,2,3- triazol-4-yl)(8-fluoroquinolin-5- yl)methyl)amino)-8-chloro-4-((3,3,3-trifluoro- 2,2-dimethylpropyl)amino)quinoline-3- carbonitrile::US11066414, Compound 917	3	aid1805683	Gilead Sciences, Inc.	124181749
1059494	InChI=1S/C32H33ClF2N8O/c1-31(2,3)17-39-26-18(14-36)15-38-27-23(26)12-19(13-24(27)33)40-28(25-16-43(42-41-25)32(9-10-32)30(34)35)21-6-5-7-22-20(21)8-11-37-29(22)44-4/h5-8,11-13,15-16,28,30,40-42H,9-10,17H2,1-4H3,(H,38,39)/t28-/m0/s1	(S)-8-chloro-6-(((1-(1-(difluoromethyl)cyclo- propyl)-1H-1,2,3-triazol-4-yl)(1- methoxylsoquinolin-5-yl)methyl)amino)-4- (neopentylamino)quinoline-3-carbonitrile::US11066414, Compound 914	9	aid1805683	Gilead Sciences, Inc.	124181748
1059492	InChI=1S/C31H33ClN8O/c1-31(2,3)17-36-27-18(14-33)15-35-28-24(27)12-19(13-25(28)32)37-29(26-16-40(39-38-26)20-8-9-20)22-6-5-7-23-21(22)10-11-34-30(23)41-4/h5-7,10-13,15-16,20,29,37-39H,8-9,17H2,1-4H3,(H,35,36)/t29-/m0/s1	(S)-8-chloro-6-(((1-cyclopropyl-1H-1,2,3- triazol-4-yl)(1-methoxylsoquinolin-5- yl)methyl)amino)-4- (neopentylamino)quinoline-3-carbonitrile::US11066414, Compound 912	6	aid1805683	Gilead Sciences, Inc.	124181745
1059493	InChI=1S/C32H35ClN8O/c1-31(2,3)18-37-27-19(15-34)16-36-28-24(27)13-20(14-25(28)33)38-29(26-17-41(40-39-26)32(4)10-11-32)22-7-6-8-23-21(22)9-12-35-30(23)42-5/h6-9,12-14,16-17,29,38-40H,10-11,18H2,1-5H3,(H,36,37)/t29-/m0/s1	(S)-8-chloro-6-(((1-methoxylsoquinolin-5- yl)(1-(1-methylcyclopropyl)-1H-1,2,3- triazol-4-yl)methyl)amino)-4- (neopentylamino)quinoline-3-carbonitrile::US11066414, Compound 913	6	aid1805683	Gilead Sciences, Inc.	124181744
1059489	InChI=1S/C33H29F3N10/c1-31(2,3)18-42-29-21(13-38)16-41-28-20(12-37)9-22(10-26(28)29)43-30(24-6-4-5-19-15-40-23(14-39)11-25(19)24)27-17-46(45-44-27)32(7-8-32)33(34,35)36/h4-6,9-11,15-17,30,43-45H,7-8,18H2,1-3H3,(H,41,42)/t30-/m0/s1	(S)-6-(((3-cyanoisoquinolin-5-yl)(1-(1- (trifluoromethyl)cyclopropyl)-1H- 1,2,3-triazol-4-yl)methyl)amino)-4- (neopentylamino)quinoline-3,8-dicarbonitrile::US11066414, Compound 909	8	aid1805683	Gilead Sciences, Inc.	124181743
1059487	InChI=1S/C31H32FN11O/c1-17-22(6-7-25(32)37-17)28(24-15-43(42-40-24)31(8-9-31)29-41-39-18(2)44-29)38-21-10-19(12-33)26-23(11-21)27(20(13-34)14-35-26)36-16-30(3,4)5/h6-7,10-11,14-15,28,38,40,42H,8-9,16H2,1-5H3,(H,35,36)/t28-/m0/s1	(S)-6-(((6-fluoro-2-methylpyridin-3-yl)(1-(1- (5-methyl-l,3,4-oxadiazol-2-yl)cyclopropyl)- 1H-1,2,3-triazol-4-yl)methyl)amino)-4- (neopentylamino)quinoline-3,8-dicarbonitrile::US11066414, Compound 907	4	aid1805683	Gilead Sciences, Inc.	124181742
1059485	InChI=1S/C29H30F3N9O/c1-27(2,3)16-37-25-19(12-34)14-36-24-18(11-33)9-20(10-21(24)25)38-26(17-5-6-23(42-4)35-13-17)22-15-41(40-39-22)28(7-8-28)29(30,31)32/h5-6,9-10,13-15,26,38-40H,7-8,16H2,1-4H3,(H,36,37)/t26-/m0/s1	(S)-6-(((6-methoxypyridin-3-yl)(1-(1- (trifluoromethyl)cyclopropyl)-1H-1,2,3- triazol-4-yl)methyl)amino)-4- (neopentylamino)quinoline-3,8-dicarbonitrile::US11066414, Compound 905	15	aid1805683	Gilead Sciences, Inc.	124181739
1059484	InChI=1S/C27H28F3N9S/c1-15-24(40-14-35-15)23(20-12-39(38-37-20)26(5-6-26)27(28,29)30)36-18-7-16(9-31)21-19(8-18)22(17(10-32)11-33-21)34-13-25(2,3)4/h7-8,11-12,14,23,36-38H,5-6,13H2,1-4H3,(H,33,34)/t23-/m1/s1	(R)-6-(((4-methylthiazol-5-yl)(1-(1- (trifluoromethyl)cyclopropyl)-1H-1,2,3- triazol-4-yl)methyl)amino)-4- (neopentylamino)quinoline-3,8-dicarbonitrile::US11066414, Compound 904	5	aid1805683	Gilead Sciences, Inc.	124181738
1059483	InChI=1S/C29H33N9S/c1-17-27(39-16-34-17)26(23-14-38(37-36-23)29(7-8-29)20-5-6-20)35-21-9-18(11-30)24-22(10-21)25(19(12-31)13-32-24)33-15-28(2,3)4/h9-10,13-14,16,20,26,35-37H,5-8,15H2,1-4H3,(H,32,33)/t26-/m1/s1	(R)-6-(((1-([1,1'-bi(cyclopropan)]-1-yl)-1H- 1,2,3-triazol-4-yl)(4-methyl thiazol-5- yl)methyl)amino)-4- (neopentylamino)quinoline-3,8-dicarbonitrile::US11066414, Compound 903	3	aid1805683	Gilead Sciences, Inc.	124181737
1059482	InChI=1S/C33H35N9/c1-20-9-10-24-25(7-6-8-27(24)38-20)31(28-18-42(41-40-28)33(5)11-12-33)39-23-13-21(15-34)29-26(14-23)30(22(16-35)17-36-29)37-19-32(2,3)4/h6-10,13-14,17-18,31,39-41H,11-12,19H2,1-5H3,(H,36,37)/t31-/m0/s1	(S)-6-(((4-(1-(1-methylcyclopropyl)-1H-1,2,3- triazol-4-yl)(2-methylquinolin-5- yl)methyl)amino)-4- (neopentylamino)quinoline-3,8-dicarbonitrile::US11066414, Compound 902	3	aid1805683	Gilead Sciences, Inc.	124181736
1059479	InChI=1S/C31H30FN9/c1-31(2,3)17-37-29-19(14-34)15-36-28-18(13-33)10-20(11-23(28)29)38-30(26-16-41(40-39-26)27-12-24(27)32)22-6-4-8-25-21(22)7-5-9-35-25/h4-11,15-16,24,27,30,38-40H,12,17H2,1-3H3,(H,36,37)/t24-,27+,30-/m0/s1	6-(((S)-(1-((1R,2S)-2-fluorocyclopropyl)- 1H-1,2,3-triazol-4-yl)(quinolin-5- yl)methyl)amino)-4- (neopentylamino)quinoline-3,8-dicarbonitrile::US11066414, Compound 899	2	aid1805683	Gilead Sciences, Inc.	124181733
1059477	InChI=1S/C33H30F3N9/c1-31(2,33(34,35)36)18-41-29-21(15-38)16-40-28-20(14-37)9-22(10-25(28)29)42-30(24-5-3-7-26-23(24)6-4-8-39-26)27-17-45(44-43-27)32-11-19(12-32)13-32/h3-10,16-17,19,30,42-44H,11-13,18H2,1-2H3,(H,40,41)/t19?,30-,32?/m0/s1	(S)-6-(((1-(bicyclo[1.1.1]pentan-1-yl)-1H- 1,2,3-triazol-4-yl)(quinolin-5- yl)methyl)amino)-4-((3,3,3-trifluoro-2,2- dimethylpropyl)amino)quinoline-3,8- dicarbonitrile::US11066414, Compound 897	2	aid1805683	Gilead Sciences, Inc.	124181730
1059476	InChI=1S/C34H32F3N9/c1-32(2,34(35,36)37)19-42-30-21(16-39)17-41-29-20(15-38)13-23(14-26(29)30)43-31(25-5-3-7-27-24(25)6-4-12-40-27)28-18-46(45-44-28)33(10-11-33)22-8-9-22/h3-7,12-14,17-18,22,31,43-45H,8-11,19H2,1-2H3,(H,41,42)/t31-/m0/s1	(S)-6-(((1-([1,1'- bi(cyclopropan)]-1-yl)-1H- 1,2,3-triazol-4-yl)(quinolin-5- yl)methyl)amino)-4-((3,3,3-trifluoro-2,2- dimethylpropyl)amino)quinoline-3,8- dicarbonitrile::US11066414, Compound 896	3	aid1805683	Gilead Sciences, Inc.	124181729
1059475	InChI=1S/C32H30F3N9/c1-30(2,32(33,34)35)18-40-28-20(15-37)16-39-27-19(14-36)12-21(13-24(27)28)41-29(26-17-44(43-42-26)31(3)9-10-31)23-6-4-8-25-22(23)7-5-11-38-25/h4-8,11-13,16-17,29,41-43H,9-10,18H2,1-3H3,(H,39,40)/t29-/m0/s1	(S)-6-(((1-(1- methylcyclopropyl)-1H-1,2,3- triazol-4-yl)(quinolin-5-yl)methyl)amino)- 4-((3,3,3-trifluoro-2,2- dimethylpropyl)amino)quinoline-3,8- dicarbonitrile::US11066414, Compound 895	3	aid1805683	Gilead Sciences, Inc.	124181728
1059473	InChI=1S/C31H31F2N9/c1-31(2,3)18-38-29-20(15-35)16-37-28-19(14-34)10-21(11-25(28)29)39-30(27-17-42(41-40-27)22(12-32)13-33)24-6-4-8-26-23(24)7-5-9-36-26/h4-11,16-17,22,30,39-41H,12-13,18H2,1-3H3,(H,37,38)/t30-/m0/s1	(S)-6-(((1-(1,3-difluoropropan-2-yl)-1H- 1H-1,2,3-triazol-4-yl)(quinolin-5- yl)methyl)amino)-4-(neopentyl- amino)quinoline-3,8-dicarbonitrile::US11066414, Compound 893	4	aid1805683	Gilead Sciences, Inc.	124181727
1059469	InChI=1S/C33H30F5N9O/c1-31(2,3)17-42-27-19(14-40)15-41-26-18(13-39)11-20(12-24(26)27)43-28(25-16-47(45-44-25)32(8-9-32)33(36,37)38)22-5-4-6-23-21(22)7-10-46(29(23)48)30(34)35/h4-7,10-12,15-16,28,30,43-45H,8-9,17H2,1-3H3,(H,41,42)/t28-/m0/s1	(S)-6-(((2-(difluoromethyl)-1-oxo-1,2- dihydroisoquinolin-5-yl)(1-(1- (trifluoromethyl)cyclopropyl)-1H-1,2,3- triazol-4-yl)methyl)amino)-4- (neopentylamino)quinoline-3,8-dicarbonitrile::US11066414, Compound 889	9	aid1805683	Gilead Sciences, Inc.	124181722
1059454	InChI=1S/C34H32F5N9O/c1-32(2,3)18-43-29-20(14-41)15-42-28-19(13-40)11-21(12-25(28)29)44-30(26-16-48(46-45-26)33(8-9-33)34(37,38)39)23-5-4-6-24-22(23)7-10-47(31(24)49)17-27(35)36/h4-7,10-12,15-16,27,30,44-46H,8-9,17-18H2,1-3H3,(H,42,43)/t30-/m0/s1	(S)-6-(((2-(2,2-difluoroethyl)-1-oxo-1,2- dihydroisoquinolin-5-yl)(1-(1- (trifluoromethyl)cyclopropyl)- 1H-1,2,3-triazol- 4-yl)methyl)amino)-4- (neopentylamino)quinoline- 3,8-dicarbonitrile::US11066414, Compound 874	3	aid1805683	Gilead Sciences, Inc.	124181709
1059455	InChI=1S/C34H31F6N9O/c1-31(2,3)17-44-28-20(14-42)15-43-27-19(13-41)11-21(12-25(27)28)45-29(26-16-49(47-46-26)32(8-9-32)34(38,39)40)23-5-4-6-24-22(23)7-10-48(30(24)50)18-33(35,36)37/h4-7,10-12,15-16,29,45-47H,8-9,17-18H2,1-3H3,(H,43,44)/t29-/m0/s1	(S)-4-(neopentylamino)-6-(((1-oxo-2-(2,2,2- trifluoroethyl)-1,2-dihydroisoquinolin-5- yl)(1-(1-(trifluoromethyl)cyclopropyl)-1H- 1,2,3-triazol-4-yl)methyl)amino)quinoline- 3,8-dicarbonitrile::US11066414, Compound 875	2	aid1805683	Gilead Sciences, Inc.	124181707
1059450	InChI=1S/C34H33F4N9O/c1-33(2,3)18-42-29-20(14-40)15-41-28-19(13-39)11-21(12-25(28)29)43-30(26-16-47(45-44-26)34(8-9-34)32(37)38)23-5-4-6-24-22(23)7-10-46(31(24)48)17-27(35)36/h4-7,10-12,15-16,27,30,32,43-45H,8-9,17-18H2,1-3H3,(H,41,42)/t30-/m0/s1	(S)-6-(((2-(2,2-difluoroethyl)-1-oxo-1,2- dihydroisoquinolin-5-yl)(1-(1- (difluoromethyl)cyclopropyl)-1H-1,2,3-triazol- 4-yl)methyl)amino)-4- (neopentylamino)quinoline- 3,8-dicarbonitrile::US11066414, Compound 870	2	aid1805683	Gilead Sciences, Inc.	124181703
1059448	InChI=1S/C31H34FN9O/c1-17-22(6-7-24(32)37-17)27(28-29(42-5)41(40-39-28)31-10-18(11-31)12-31)38-21-8-19(13-33)25-23(9-21)26(20(14-34)15-35-25)36-16-30(2,3)4/h6-9,15,18,27,38-40H,10-12,16H2,1-5H3,(H,35,36)/t18?,27-,31?/m0/s1	(S)-6-(((1-(bicyclo[1.1,1]pentan- 1-yl)-5-methoxy- 1H-1,2,3-triazol-4-yl)(6-fluoro- 2-methylpyridin-3- yl)methyl)amino)-4- (neopentylamino)quinoline- 3,8-dicarbonitrile::US11066414, Compound 868	2	aid1805683	Gilead Sciences, Inc.	124181702
1059441	InChI=1S/C30H28F5N9/c1-15-20(4-5-22(31)40-15)25(26-27(32)44(43-42-26)29-8-16(9-29)10-29)41-19-6-17(11-36)23-21(7-19)24(18(12-37)13-38-23)39-14-28(2,3)30(33,34)35/h4-7,13,16,25,41-43H,8-10,14H2,1-3H3,(H,38,39)/t16?,25-,29?/m0/s1	(S)-6-(((1-(bicyclo[1.1.1]pentan-1-yl)-5- fluoro-1H-1,2,3-triazol-4-yl)(6-fluoro-2- methylpyridin-3-yl)methyl)amino)-4-((3,3,3- trifluoro-2,2- dimethylpropyl)amino)quinoline- 3,8-dicarbonitrile::US11066414, Compound 861	7	aid1805683	Gilead Sciences, Inc.	124181700
1059443	InChI=1S/C29H28F5N9/c1-15-19(5-6-21(30)39-15)24(25-26(31)43(42-41-25)28(4)7-8-28)40-18-9-16(11-35)22-20(10-18)23(17(12-36)13-37-22)38-14-27(2,3)29(32,33)34/h5-6,9-10,13,24,40-42H,7-8,14H2,1-4H3,(H,37,38)/t24-/m0/s1	(S)-6-(((5-fluoro-1-(1- methylcyclopropyl)-1H- 1,2,3-triazol-4-yl)(6-fluoro- 2-methylpyridin- 3-yl)methyl)amino)-4- ((3,3,3-trifluoro-2,2- dimethylpropyl)amino)- quinoline-3,8-dicarbonitrile::US11066414, Compound 863	2	aid1805683	Gilead Sciences, Inc.	124181698
1059447	InChI=1S/C31H31F4N9/c1-17-22(6-7-25(32)40-17)28(24-15-44(43-42-24)30(8-9-30)20-4-5-20)41-21-10-18(12-36)26-23(11-21)27(19(13-37)14-38-26)39-16-29(2,3)31(33,34)35/h6-7,10-11,14-15,20,28,41-43H,4-5,8-9,16H2,1-3H3,(H,38,39)/t28-/m0/s1	(S)-6-(((4-(1-(1,1-bi(cyclopropan)]- 1-yl)-1H-1,2,3- triazol-4-yl)(6-fluoro-2-methylpyridin-3- yl)methyl)amino)-4-((3,3,3-trifluoro-2,2- dimethylpropyl)amino)quinoline-3,8- dicarbonitrile::US11066414, Compound 867	3	aid1805683	Gilead Sciences, Inc.	124181697
1059435	InChI=1S/C30H28F3N9S/c1-28(2,3)16-38-26-18(11-35)12-37-25-17(10-34)8-19(9-21(25)26)39-27(22-15-43-24-13-36-7-4-20(22)24)23-14-42(41-40-23)29(5-6-29)30(31,32)33/h4,7-9,12-15,27,39-41H,5-6,16H2,1-3H3,(H,37,38)/t27-/m0/s1	(S)-4-(neopentylamino)-6-((thieno[2,3- c]pyridin-3-yl(1-(1-(trifluoro- methyl)cyclopropyl)- 1H-1,2,3-triazol-4-yl)methyl)- amino)quinoline- 3,8-dicarbonitrile::US11066414, Compound 855	2	aid1805683	Gilead Sciences, Inc.	124181696
1059445	InChI=1S/C31H33F2N9/c1-17-22(7-8-24(32)38-17)27(28-29(33)42(41-40-28)31(9-10-31)20-5-6-20)39-21-11-18(13-34)25-23(12-21)26(19(14-35)15-36-25)37-16-30(2,3)4/h7-8,11-12,15,20,27,39-41H,5-6,9-10,16H2,1-4H3,(H,36,37)/t27-/m0/s1	(S)-6-((d-([1,1'-bi(cyclopropan)]- 1-yl)-5-fluoro- 1H-1,2,3-triazol-4-yl)(6- fluoro-2-methylpyridin- 3-yl)methyl)amino)-4- (neopentylamino)quinoline- 3,8-dicarbonitrile::US11066414, Compound 865	4	aid1805683	Gilead Sciences, Inc.	124181695
1059434	InChI=1S/C28H30F3N9/c1-15(10-29)40-27(31)26(38-39-40)25(20-6-7-22(30)36-16(20)2)37-19-8-17(11-32)23-21(9-19)24(18(12-33)13-34-23)35-14-28(3,4)5/h6-9,13,15,25,37-39H,10,14H2,1-5H3,(H,34,35)/t15-,25-/m0/s1	6-(((S)-(5-fluoro-1-((S)-1-fluoropropan-2- yl)-1H-1,2,3-triazol-4-yl)(6-fluoro-2- methylpyridin-3-yl)methyl)amino)-4- (neopentylamino)quinoline-3,8- dicarbonitrile::US11066414, Compound 854	4	aid1805683	Gilead Sciences, Inc.	124181694
1059440	InChI=1S/C32H38FN9/c1-19-23(8-9-26(33)38-19)29(25-17-42(41-40-25)32(10-11-32)31(5,6)7)39-22-12-20(14-34)27-24(13-22)28(21(15-35)16-36-27)37-18-30(2,3)4/h8-9,12-13,16-17,29,39-41H,10-11,18H2,1-7H3,(H,36,37)/t29-/m0/s1	(S)-6-(((1-(1-(tert-butyl)cyclopropyl)- 1H-1,2,3- triazol-4-yl)(6-fluoro-2-methylpyridin-3- yl)methyl)amino)-4- (neopentylamino)quinoline- 3,8-dicarbonitrile::US11066414, Compound 860	3	aid1805683	Gilead Sciences, Inc.	124181692
1059438	InChI=1S/C28H27F6N9/c1-14(9-29)43-26(31)25(41-42-43)24(19-5-6-21(30)39-15(19)2)40-18-7-16(10-35)22-20(8-18)23(17(11-36)12-37-22)38-13-27(3,4)28(32,33)34/h5-8,12,14,24,40-42H,9,13H2,1-4H3,(H,37,38)/t14-,24-/m0/s1	6-(((S)-(5-fluoro-1-((S)-1-fluoropropan-2-yl)- 1H-1,2,3-triazol-4-yl)(6-fluoro- 2-methylpyridin- 3-yl)methyl)amino)-4-((3,3,3-trifluoro-2,2- dimethylpropyl)amino)quinoline-3,8- dicarbonitrile::US11066414, Compound 858	7	aid1805683	Gilead Sciences, Inc.	124181691
1059442	InChI=1S/C31H30F5N9/c1-16-21(6-7-23(32)41-16)26(27-28(33)45(44-43-27)30(8-9-30)19-4-5-19)42-20-10-17(12-37)24-22(11-20)25(18(13-38)14-39-24)40-15-29(2,3)31(34,35)36/h6-7,10-11,14,19,26,42-44H,4-5,8-9,15H2,1-3H3,(H,39,40)/t26-/m0/s1	(S)-6-(((1-([1,1'-bi(cyclopropan)]- 1-yl)-5-fluoro- 1H-1,2,3-triazol-4-yl)(6- fluoro-2-methylpyridin- 3-yl)methyl)amino)-4-((3,3,3-trifluoro-2,2- dimethylpropyl)amino)quinoline- 3,8-dicarbonitrile::US11066414, Compound 862	8	aid1805683	Gilead Sciences, Inc.	124181689
1059430	InChI=1S/C31H36FN9/c1-18-23(9-10-26(32)37-18)29(25-16-41(40-39-25)31(5,6)21-7-8-21)38-22-11-19(13-33)27-24(12-22)28(20(14-34)15-35-27)36-17-30(2,3)4/h9-12,15-16,21,29,38-40H,7-8,17H2,1-6H3,(H,35,36)/t29-/m0/s1	(S)-6-(((1-{2-cyclopropylpropan- 2-yl)-1H-1,2,3-triazol- 4-yl)(6-fluoro-2-methylpyridin- 3-yl)methyl)amino)- 4-(neopentylamino)quinoline- 3,8-dicarbonitrile::US11066414, Compound 850	6	aid1805683	Gilead Sciences, Inc.	124181684
1059431	InChI=1S/C31H36FN9/c1-18(2)31(9-10-31)41-16-25(39-40-41)29(23-7-8-26(32)37-19(23)3)38-22-11-20(13-33)27-24(12-22)28(21(14-34)15-35-27)36-17-30(4,5)6/h7-8,11-12,15-16,18,29,38-40H,9-10,17H2,1-6H3,(H,35,36)/t29-/m0/s1	(S)-6-(((6-fluoro-2- methylpyridin-3-yl)(1-(1- isopropylcyclopropyl)-1H- 1,2,3-triazol-4- yl)methyl)amino)-4- (neopentylamino)quinoline- 3,8-dicarbonitrile::US11066414, Compound 851	3	aid1805683	Gilead Sciences, Inc.	124181681
1059424	InChI=1S/C29H30F3N9O/c1-27(2,3)16-36-24-18(13-34)14-35-23-17(12-33)10-19(11-21(23)24)37-25(20-6-5-9-40(4)26(20)42)22-15-41(39-38-22)28(7-8-28)29(30,31)32/h5-6,9-11,14-15,25,37-39H,7-8,16H2,1-4H3,(H,35,36)/t25-/m0/s1	(S)-6-(((1-methyl-2-oxo- 1,2-dihydropyridin-3- yl)(1-(1-(trifluoromethyl)cyclopropyl)-1H- 1,2,3-triazol-4-yl)methyl)amino)-4- (neopentylamino)quinoline- 3,8-dicarbonitrile::US11066414, Compound 844	13	aid1805683	Gilead Sciences, Inc.	124181678
1059423	InChI=1S/C29H26F7N9/c1-15-19(4-5-22(30)41-15)25(21-13-45(44-43-21)27(6-7-27)29(34,35)36)42-18-8-16(10-37)23-20(9-18)24(17(11-38)12-39-23)40-14-26(2,3)28(31,32)33/h4-5,8-9,12-13,25,42-44H,6-7,14H2,1-3H3,(H,39,40)/t25-/m0/s1	(S)-6-(((6-fluoro-2-methylpyridin-3-yl)(1- (1-(trifluoromethyl)cyclopropyl)-1H-1,2,3- triazol-4-yl)methyl)amino)-4-((3,3,3- trifluoro-2,2-dimethylpropyl)amino)- quinoline-3,8-dicarbonitrile::US11066414, Compound 843	4	aid1805683	Gilead Sciences, Inc.	124181676
1059420	InChI=1S/C30H32F3N9/c1-17-21(5-6-24(31)38-17)27(23-14-42(41-40-23)16-30(7-8-30)28(32)33)39-20-9-18(11-34)25-22(10-20)26(19(12-35)13-36-25)37-15-29(2,3)4/h5-6,9-10,13-14,27-28,39-41H,7-8,15-16H2,1-4H3,(H,36,37)/t27-/m0/s1	(S)-6-(((4-(1-(1- (difluoromethyl)cyclopropyl)methyl)- 1H-1,2,3-triazol-4-yl)(6-fluoro- 2-methylpyridin- 3-yl)methyl)amino)-4- (neopentylamino)quinoline- 3,8-dicarbonitrile::US11066414, Compound 840	4	aid1805683	Gilead Sciences, Inc.	124181673
1059418	InChI=1S/C33H30F5N9O/c1-31(2,33(36,37)38)17-42-27-19(14-40)15-41-26-18(13-39)11-20(12-24(26)27)43-28(25-16-47(45-44-25)32(8-9-32)30(34)35)22-5-4-6-23-21(22)7-10-46(3)29(23)48/h4-7,10-12,15-16,28,30,43-45H,8-9,17H2,1-3H3,(H,41,42)/t28-/m0/s1	(S)-6-(((1-(1-(difluoromethyl)- cyclopropyl)-1H- 1,2,3-triazol-4-yl)(2-methyl-1-oxo-1,2- dihydroisoquinolin-5- yl)methyl)amino)-4-((3,3,3- trifluoro-2,2-dimethylpropyl)- amino)quinoline- 3,8-dicarbonitrile::US11066414, Compound 838	3	aid1805683	Gilead Sciences, Inc.	124181672
1059417	InChI=1S/C29H32F3N9/c1-6-29(31,32)16-41-14-23(39-40-41)27(21-7-8-24(30)37-17(21)2)38-20-9-18(11-33)25-22(10-20)26(19(12-34)13-35-25)36-15-28(3,4)5/h7-10,13-14,27,38-40H,6,15-16H2,1-5H3,(H,35,36)/t27-/m0/s1	(S)-6-(((1-(2,2-difluorobutyl)- 1H-1,2,3-triazol-4- yl)(6-fluoro-2-methylpyridin- 3-yl)methyl)amino)- 4-(neopentylamino)quinoline-3,8- dicarbonitrile::US11066414, Compound 837	7	aid1805683	Gilead Sciences, Inc.	124181671
1059416	InChI=1S/C28H30F3N9/c1-16-20(6-7-23(29)36-16)26(22-13-40(39-38-22)15-28(5,30)31)37-19-8-17(10-32)24-21(9-19)25(18(11-33)12-34-24)35-14-27(2,3)4/h6-9,12-13,26,37-39H,14-15H2,1-5H3,(H,34,35)/t26-/m0/s1	(S)-6-(((1-(2,2-difluoropropyl)- 1H-1,2,3-triazol-4- yl)(6-fluoro-2-methylpyridin- 3-yl)methyl)amino)- 4-(neopentylamino)quinoline-3,8- dicarbonitrile::US11066414, Compound 836	4	aid1805683	Gilead Sciences, Inc.	124181670
1059413	InChI=1S/C30H29F4N9/c1-16-21(4-5-24(31)39-16)27(23-14-43(42-41-23)29-8-17(9-29)10-29)40-20-6-18(11-35)25-22(7-20)26(19(12-36)13-37-25)38-15-28(2,3)30(32,33)34/h4-7,13-14,17,27,40-42H,8-10,15H2,1-3H3,(H,37,38)/t17?,27-,29?/m0/s1	(S)-6-(((1-(bicyclo[1.1.1]pentan-1-yl)-1H- 1,2,3-triazol-4-yl)(6-fluoro-2-methylpyridin- 3-yl)methyl)amino)-4-((3,3,3-trifluoro-2,2- dimethylpropyl)amino)quinoline-3,8- dicarbonitrile::US11066414, Compound 833	2	aid1805683	Gilead Sciences, Inc.	124181667
1059412	InChI=1S/C29H27F6N9/c1-15-19(4-5-22(30)40-15)25(21-13-44(43-42-21)28(6-7-28)26(31)32)41-18-8-16(10-36)23-20(9-18)24(17(11-37)12-38-23)39-14-27(2,3)29(33,34)35/h4-5,8-9,12-13,25-26,41-43H,6-7,14H2,1-3H3,(H,38,39)/t25-/m0/s1	(S)-6-(((1-(l-(difluoromethyl)- cyclopropyl)-1H- 1,2,3-triazol-4-yl)(6-fluoro-2-methylpyridin- 3-yl)methyl)amino)-4-((3,3,3-trifluoro-2,2- dimethylpropyl)amino)quinoline-3,8- dicarbonitrile::US11066414, Compound 832::US11066414, Compound 841	2	aid1805683	Gilead Sciences, Inc.	124181666
1059409	InChI=1S/C30H33F2N9/c1-17-6-7-22(18(2)37-17)27(24-15-41(40-39-24)30(8-9-30)28(31)32)38-21-10-19(12-33)25-23(11-21)26(20(13-34)14-35-25)36-16-29(3,4)5/h6-7,10-11,14-15,27-28,38-40H,8-9,16H2,1-5H3,(H,35,36)/t27-/m0/s1	(S)-6-(((1-(1-(difluoromethyl)- cyclopropyl)- 1H-1,2,3-triazol- 4-yl)(2,6-dimethylpyridin-3- yl)methyl)amino)-4- (neopentylamino)quinoline-3,8- dicarbonitrile::US11066414, Compound 829	4	aid1805683	Gilead Sciences, Inc.	124181663
1059402	InChI=1S/C30H29F3N10/c1-28(2,3)17-38-26-20(13-35)14-37-25-19(12-34)10-21(11-22(25)26)39-27(18-4-5-24-36-8-9-42(24)15-18)23-16-43(41-40-23)29(6-7-29)30(31,32)33/h4-5,8-11,14-16,27,39-41H,6-7,17H2,1-3H3,(H,37,38)/t27-/m0/s1	(S)-6-((imidazo[1,2-a]pyridin-6-yl(1-(1- (trifluoromethyl)cyclopropyl)- 1H-1,2,3-triazol- 4-yl)methyl)amino)-4- (neopentylamino)quinoline-3,8- dicarbonitrile::US11066414, Compound 822	10	aid1805683	Gilead Sciences, Inc.	124181658
1059403	InChI=1S/C35H37N9O/c1-34(2,3)20-40-31-22(17-37)18-39-30-21(16-36)14-24(15-28(30)31)41-32(26-6-5-7-27-25(26)10-13-38-33(27)45-4)29-19-44(43-42-29)35(11-12-35)23-8-9-23/h5-7,10,13-15,18-19,23,32,41-43H,8-9,11-12,20H2,1-4H3,(H,39,40)/t32-/m0/s1	(S)-6-(((1-([1,1'-bi(cyclopropan)]-1-yl)-1H- 1,2,3-triazol-4-yl)(1-methoxylsoquinolin-5- yl)methyl)amino)-4- (neopentylamino)quinoline-3,8- dicarbonitrile::US11066414, Compound 823	4	aid1805683	Gilead Sciences, Inc.	124181657
1059404	InChI=1S/C32H34FN9O/c1-19(13-33)42-17-27(40-41-42)30(24-7-6-8-25-23(24)9-10-36-31(25)43-5)39-22-11-20(14-34)28-26(12-22)29(21(15-35)16-37-28)38-18-32(2,3)4/h6-12,16-17,19,30,39-41H,13,18H2,1-5H3,(H,37,38)/t19-,30-/m0/s1	6-(((S)-(1-((S)-1- fluoropropan-2-yl)-1H-1,2,3- triazol-4-yl)(1-methoxylsoquinolin-5- yl)methyl)amino)-4- (neopentylamino)quinoline-3,8- dicarbonitrile::US11066414, Compound 824	5	aid1805683	Gilead Sciences, Inc.	124181656
1059401	InChI=1S/C33H30F5N9O/c1-31(2,33(36,37)38)17-43-27-19(14-40)15-42-26-18(13-39)11-20(12-24(26)27)44-28(25-16-47(46-45-25)32(8-9-32)30(34)35)22-5-4-6-23-21(22)7-10-41-29(23)48-3/h4-7,10-12,15-16,28,30,44-46H,8-9,17H2,1-3H3,(H,42,43)/t28-/m0/s1	(S)-6-(( (Ml-(difluoromethyl)cyclopropyl)-1H-1,2,3- triazol-4-yl)(1-methoxylsoquinolin-5- yl)methyl)amino)-4-((3,3,3-trifluoro-2,2- dimethylpropyl)amino)quinoline-3,8- dicarbonitrile::US11066414, Compound 821	3	aid1805683	Gilead Sciences, Inc.	124181655
1059399	InChI=1S/C33H32F3N9O/c1-31(2,33(34,35)36)18-41-28-20(15-38)16-40-27-19(14-37)12-21(13-25(27)28)42-29(26-17-45(44-43-26)32(3)9-10-32)23-6-5-7-24-22(23)8-11-39-30(24)46-4/h5-8,11-13,16-17,29,42-44H,9-10,18H2,1-4H3,(H,40,41)/t29-/m0/s1	(S)-6-(((1-methoxylsoquinolin-5-yl)(1-(1- methylcyclopropyl)-1H-1,2,3-triazol-4- yl)methyl)amino)-4-((3,3,3-trifluoro-2,2- dimethylpropyl)amino)quinoline-3,8- dicarbonitrile::US11066414, Compound 819	2	aid1805683	Gilead Sciences, Inc.	124181652
1059394	InChI=1S/C33H32FN9/c1-32(2,3)18-39-29-21(15-36)16-38-28-20(14-35)9-22(10-25(28)29)40-31(24-6-7-26(34)30-23(24)5-4-8-37-30)27-17-43(42-41-27)33-11-19(12-33)13-33/h4-10,16-17,19,31,40-42H,11-13,18H2,1-3H3,(H,38,39)/t19?,31-,33?/m0/s1	(S)-6-(((1-(bicyclo[1.1.1]pentan- 1-yl)-1H-1,2,3- triazol-4-yl)(8-fluoroquinolin- 5-yl)methyl)amino)- 4-(neopentylamino)quinoline- 3,8-dicarbonitrile::US11066414, Compound 814	2	aid1805683	Gilead Sciences, Inc.	124181651
1059396	InChI=1S/C33H29F4N9/c1-31(2,33(35,36)37)17-42-28-20(14-39)15-41-27-19(13-38)8-21(9-24(27)28)43-30(23-5-6-25(34)29-22(23)4-3-7-40-29)26-16-46(45-44-26)32-10-18(11-32)12-32/h3-9,15-16,18,30,43-45H,10-12,17H2,1-2H3,(H,41,42)/t18?,30-,32?/m0/s1	(S)-6-(((1-(bicyclo[1.1.1]pentan- 1-yl)-1H-1,2,3- triazol-4-yl)(8-fluoroquinolin- 5-yl)methyl)amino)- 4-((3,3,3-trifluoro-2,2- dimethylpropyl)amino)quinoline- 3,8-dicarbonitrile::US11066414, Compound 816	1	aid1805683	Gilead Sciences, Inc.	124181649
1059395	InChI=1S/C32H27F6N9/c1-30(2,32(36,37)38)16-43-26-18(13-40)14-42-25-17(12-39)10-19(11-22(25)26)44-28(21-5-6-23(33)27-20(21)4-3-9-41-27)24-15-47(46-45-24)31(7-8-31)29(34)35/h3-6,9-11,14-15,28-29,44-46H,7-8,16H2,1-2H3,(H,42,43)/t28-/m0/s1	(S)-6-(((1-{1-(difluoromethyl)- cyclopropyl)-1H- 1,2,3-triazol-4-yl)(8- fluoroquinolin-5- yl)methyl)amino)-4 -((3,3,3-trifluoro-2,2- dimethylpropyl)amino)quinoline- 3,8-dicarbonitrile::US11066414, Compound 815	3	aid1805683	Gilead Sciences, Inc.	124181647
1059387	InChI=1S/C34H35N9O/c1-33(2,3)19-39-30-22(16-36)17-38-29-21(15-35)10-23(11-27(29)30)40-31(28-18-43(42-41-28)34-12-20(13-34)14-34)25-6-5-7-26-24(25)8-9-37-32(26)44-4/h5-11,17-18,20,31,40-42H,12-14,19H2,1-4H3,(H,38,39)/t20?,31-,34?/m0/s1	(S)-6-(((1-(bicyclo[1.1.1]pentan- 1-yl)-1H-1,2,3- triazol-4-yl)(1-methoxylsoquinolin-5- yl)methyl)amino)-4- (neopentylamino)quinoline- 3,8-dicarbonitrile::US11066414, Compound 807	3	aid1805683	Gilead Sciences, Inc.	124181645
1059393	InChI=1S/C32H29F4N9/c1-30(2,32(34,35)36)17-41-27-19(14-38)15-40-26-18(13-37)11-20(12-23(26)27)42-29(25-16-45(44-43-25)31(3)8-9-31)22-6-7-24(33)28-21(22)5-4-10-39-28/h4-7,10-12,15-16,29,42-44H,8-9,17H2,1-3H3,(H,40,41)/t29-/m0/s1	(S)-6-(((8-fluoroquinolin-5-yl)(1-(1- methylcyclopropyl)-1H-1,2,3-triazol-4- yl)methyl)amino)-4-((3,3,3-trifluoro-2,2- dimethylpropyl)amino)quinoline-3,8- dicarbonitrile::US11066414, Compound 813	2	aid1805683	Gilead Sciences, Inc.	124181642
1059383	InChI=1S/C30H32ClFN8/c1-18(13-32)40-16-26(38-39-40)29(22-7-5-9-25-21(22)8-6-10-34-25)37-20-11-23-27(36-17-30(2,3)4)19(14-33)15-35-28(23)24(31)12-20/h5-12,15-16,18,29,37-39H,13,17H2,1-4H3,(H,35,36)/t18-,29-/m0/s1	8-chloro-6-(((S)-(1-((S)-1- fluoropropan-2-yl)-1H- 1,2,3-triazol-4-yl)(quinolin- 5-yl)methyl)amino)- 4-(neopentylamino)quinoline- 3-carbonitrile::US11066414, Compound 803	7	aid1805683	Gilead Sciences, Inc.	124181640
1059372	InChI=1S/C28H27ClF4N8O/c1-15-18(3-4-22(30)37-15)25(21-11-41(40-39-21)27(5-6-27)28(31,32)33)38-17-7-19-23(36-12-26(2)13-42-14-26)16(9-34)10-35-24(19)20(29)8-17/h3-4,7-8,10-11,25,38-40H,5-6,12-14H2,1-2H3,(H,35,36)/t25-/m0/s1	(S)-8-chloro-6-(((6-fluoro- 2-methylpyridin-3- yl)(1-(1-(trifluoromethyl)- cyclopropyl)-1H-1,2,3- triazol-4-yl)methyl)amino)-4- (((3-methyloxetan- 3-yl)methyl)amino)quinoline-3- carbonitrile::US11066414, Compound 792	89	aid1805683	Gilead Sciences, Inc.	124181632
1059370	InChI=1S/C29H31ClN8O/c1-29(2,3)16-33-25-17(13-31)14-32-26-22(25)11-18(12-23(26)30)34-27(24-15-38(5)36-35-24)20-7-6-8-21-19(20)9-10-37(4)28(21)39/h6-12,14-15,27,34-36H,16H2,1-5H3,(H,32,33)/t27-/m0/s1	(S)-8-chloro-6-(((2-methyl-1-oxo-1,2- dihydroisoquinolin-5- yl)(1-methyl-1H-1,2,3- triazol-4-yl)methyl)amino)-4- (neopentylamino)quinoline-3- carbonitrile::US11066414, Compound 790	5	aid1805683	Gilead Sciences, Inc.	124181628
1059369	InChI=1S/C32H32ClF3N8O/c1-30(2,3)17-39-27-18(14-37)15-38-28-22(27)12-19(13-23(28)33)40-29(21-6-5-7-25-20(21)8-9-26(45)43(25)4)24-16-44(42-41-24)31(10-11-31)32(34,35)36/h5-9,12-13,15-16,29,40-42H,10-11,17H2,1-4H3,(H,38,39)/t29-/m0/s1	(S)-8-chloro-6-(((1-methyl-2-oxo-1,2- dihydroquinolin-5-yl)(1-(1- (trifluoromethyl)cyclopropyl)- 1H-1,2,3-triazol- 4-yl)methyl)amino)-4- (neopentylamino)quinoline- 3-carbonitrile::US11066414, Compound 789	13	aid1805683	Gilead Sciences, Inc.	124181627
1059374	InChI=1S/C28H29Cl2F3N8/c1-15-18(5-6-22(30)37-15)25(21-13-41(40-39-21)27(7-8-27)28(31,32)33)38-17-9-19-23(36-14-26(2,3)4)16(11-34)12-35-24(19)20(29)10-17/h5-6,9-10,12-13,25,38-40H,7-8,14H2,1-4H3,(H,35,36)/t25-/m0/s1	(S)-8-chloro-6-(((6-chloro- 2-methylpyridin-3- yl)(1-(1-(trifluoromethyl)- cyclopropyl)-1H-1,2,3- triazol-4-yl)methyl)amino)-4- (neopentylamino)quinoline- 3-carbonitrile::US11066414, Compound 794	15	aid1805683	Gilead Sciences, Inc.	124181626
1059373	InChI=1S/C27H27Cl2F3N8/c1-25(2,3)14-36-22-16(10-33)12-35-24-18(22)8-17(9-19(24)28)37-23(15-4-5-21(29)34-11-15)20-13-40(39-38-20)26(6-7-26)27(30,31)32/h4-5,8-9,11-13,23,37-39H,6-7,14H2,1-3H3,(H,35,36)/t23-/m0/s1	(S)-8-chloro-6-(((6- chloropyridin-3-yl)(1-(1- (trifluoromethyl)cyclopropyl)- 1H-1,2,3-triazol- 4-yl)methyl)amino)-4- (neopentylamino)quinoline- 3-carbonitrile::US11066414, Compound 793	35	aid1805683	Gilead Sciences, Inc.	124181625
1059368	InChI=1S/C32H30ClF5N8O/c1-30(2,3)16-41-25-17(13-39)14-40-26-22(25)11-18(12-23(26)33)42-27(24-15-46(44-43-24)31(8-9-31)32(36,37)38)20-5-4-6-21-19(20)7-10-45(28(21)47)29(34)35/h4-7,10-12,14-15,27,29,42-44H,8-9,16H2,1-3H3,(H,40,41)/t27-/m0/s1	(S)-8-chloro-6-(((2-(difluoromethyl)- 1-oxo-1,2- dihydroisoquinolin-5-yl)(1-(1- (trifluoromethyl)cyclopropyl)- 1H-1,2,3-triazol-4- yl)methyl)amino)-4- (neopentylamino)quinoline-3- carbonitrile::US11066414, Compound 788	23	aid1805683	Gilead Sciences, Inc.	124181622
1059362	InChI=1S/C28H30ClF3N8O/c1-26(2,3)15-36-22-16(12-33)13-35-23-19(22)10-17(11-20(23)29)37-24(18-6-5-9-34-25(18)41-4)21-14-40(39-38-21)27(7-8-27)28(30,31)32/h5-6,9-11,13-14,24,37-39H,7-8,15H2,1-4H3,(H,35,36)/t24-/m0/s1	(S)-8-chloro-6-(((2- methoxypyridin-3-yl)(1-(1- (trifluoromethyl)cyclopropyl)- 1H-1,2,3-triazol-4- yl)methyl)amino)-4- (neopentylamino)quinoline- 3-carbonitrile::US11066414, Compound 782	23	aid1805683	Gilead Sciences, Inc.	124181616
1059350	InChI=1S/C33H32ClF5N8O/c1-31(2,3)17-42-27-18(13-40)14-41-28-23(27)11-19(12-24(28)34)43-29(25-15-47(45-44-25)32(8-9-32)33(37,38)39)21-5-4-6-22-20(21)7-10-46(30(22)48)16-26(35)36/h4-7,10-12,14-15,26,29,43-45H,8-9,16-17H2,1-3H3,(H,41,42)/t29-/m0/s1	(S)-8-chloro-6-(((2-(2,2- difluoroethyl)-1-oxo-1,2- dihydroisoquinolin-5-yl)(1-(1- (trifluoromethyl)cyclopropyl)- 1H-1,2,3-triazol-4- yl)methyl)amino)-4- (neopentylamino)quinoline- 3-carbonitrile::US11066414, Compound 770	4	aid1805683	Gilead Sciences, Inc.	124181609
1059343	InChI=1S/C30H31ClF4N8/c1-16-20(6-7-24(32)39-16)27(23-14-43(42-41-23)29(8-9-29)18-4-5-18)40-19-10-21-25(38-15-28(2,3)30(33,34)35)17(12-36)13-37-26(21)22(31)11-19/h6-7,10-11,13-14,18,27,40-42H,4-5,8-9,15H2,1-3H3,(H,37,38)/t27-/m0/s1	(S)-6-(((1-([1,1'-bi(cyclopropan)]- 1-yl)-1H-1,2,3- triazol-4-yl)(6-fluoro-2- methylpyridin-3- yl)methyl)amino)-8-chloro- 4-((3,3,3-trifluoro- 2,2-dimethylpropyl)amino)- quinoline-3-carbonitrile::US11066414, Compound 763	3	aid1805683	Gilead Sciences, Inc.	124181603
1059333	InChI=1S/C29H31ClF4N8/c1-16-19(5-6-23(31)38-16)26(22-13-42(41-40-22)28(7-8-28)14-29(32,33)34)39-18-9-20-24(37-15-27(2,3)4)17(11-35)12-36-25(20)21(30)10-18/h5-6,9-10,12-13,26,39-41H,7-8,14-15H2,1-4H3,(H,36,37)/t26-/m0/s1	(S)-8-chloro-6-(((6-fluoro-2- methylpyridin-3- yl)(1-(1-(2,2,2-trifluoroethyl)- cyclopropyl)- 1H-1,2,3-triazol-4- yl)methyl)amino)-4- (neopentylamino)quinoline- 3-carbonitrile::US11066414, Compound 753	5	aid1805683	Gilead Sciences, Inc.	124181598
1059352	InChI=1S/C35H39ClN8O/c1-20(2)43-10-9-24-25(7-6-8-26(24)33(43)45)32(29-18-44(42-41-29)35-13-21(14-35)15-35)40-23-11-27-30(39-19-34(3,4)5)22(16-37)17-38-31(27)28(36)12-23/h6-12,17-18,20-21,32,40-42H,13-15,19H2,1-5H3,(H,38,39)/t21?,32-,35?/m0/s1	(S)-6-(((1-(bicyclo[1.1.1]pentan- 1-yl)-1H-1,2,3- triazol-4-yl)(2-isopropyl-1- oxo-1,2- dihydroisoquinolin-5- yl)methyl)amino)-8-chloro- 4-(neopentylamino)quinoline- 3-carbonitrile::US11066414, Compound 772	2	aid1805683	Gilead Sciences, Inc.	124181596
1059321	InChI=1S/C29H28ClF3N8S/c1-27(2,3)15-37-24-16(10-34)11-36-25-19(24)8-17(9-21(25)30)38-26(20-14-42-23-12-35-7-4-18(20)23)22-13-41(40-39-22)28(5-6-28)29(31,32)33/h4,7-9,11-14,26,38-40H,5-6,15H2,1-3H3,(H,36,37)/t26-/m0/s1	(S)-8-chloro-4-(neopentylamino)- 6-((thieno[2,3- c]pyridin-3-yl(1-(1- (trifluoromethyl)cyclopropyl)- 1H-1,2,3-triazol-4- yl)methyl)amino)quinoline- 3-carbonitrile::US11066414, Compound 741	6	aid1805683	Gilead Sciences, Inc.	124181595
1059351	InChI=1S/C33H31ClF6N8O/c1-30(2,3)16-43-26-18(13-41)14-42-27-23(26)11-19(12-24(27)34)44-28(25-15-48(46-45-25)31(8-9-31)33(38,39)40)21-5-4-6-22-20(21)7-10-47(29(22)49)17-32(35,36)37/h4-7,10-12,14-15,28,44-46H,8-9,16-17H2,1-3H3,(H,42,43)/t28-/m0/s1	(S)-8-chloro-4-(neopentylamino)- 6-(((1-oxo-2- (2,2,2-trifluoroethyl)-1,2- dihydroisoquinolin-5- yl)(1-(1-(trifluoromethyl)- cyclopropyl)-1H-1,2,3- triazol-4-yl)methyl)amino)quinoline- 3-carbonitrile::US11066414, Compound 771	4	aid1805683	Gilead Sciences, Inc.	124181594
1059339	InChI=1S/C28H32ClFN8O/c1-16-19(6-7-23(30)34-16)26(22-12-38(37-36-22)28(5)14-39-15-28)35-18-8-20-24(33-13-27(2,3)4)17(10-31)11-32-25(20)21(29)9-18/h6-9,11-12,26,35-37H,13-15H2,1-5H3,(H,32,33)/t26-/m0/s1	(S)-8-chloro-6-(((6-fluoro-2 -methylpyridin-3- yl)(1-(3-methyloxetan-3 -yl)-1H-1,2,3-triazol- 4-yl)methyl)amino)-4- (neopentylamino)quinoline-3- carbonitrile::US11066414, Compound 759	2	aid1805683	Gilead Sciences, Inc.	124181592
1059347	InChI=1S/C30H32ClF2N9/c1-29(2,3)16-37-24-17(13-34)14-36-25-21(24)11-18(12-22(25)31)38-26(19-5-9-35-27-20(19)6-10-41(27)4)23-15-42(40-39-23)30(7-8-30)28(32)33/h5-6,9-12,14-15,26,28,38-40H,7-8,16H2,1-4H3,(H,36,37)/t26-/m0/s1	(S)-8-chloro-6-(((1-(1- (difluoromethyl)cyclopropyl)- 1H-1,2,3-triazol-4-yl)(1- methyl-1H-pyrrolo[2,3- b]pyridin-4-yl)methyl)amino)-4- (neopentylamino)quinoline- 3-carbonitrile::US11066414, Compound 767	18	aid1805683	Gilead Sciences, Inc.	124181591
1059337	InChI=1S/C30H36ClFN8/c1-17(2)30(9-10-30)40-15-24(38-39-40)28(21-7-8-25(32)36-18(21)3)37-20-11-22-26(35-16-29(4,5)6)19(13-33)14-34-27(22)23(31)12-20/h7-8,11-12,14-15,17,28,37-39H,9-10,16H2,1-6H3,(H,34,35)/t28-/m0/s1	(S)-8-chloro-6-(((6-fluoro-2- methylpyridin-3- yl)(1-(1-isopropylcyclopropyl)- 1H-1,2,3-triazol-4- yl)methyl)amino)-4- (neopentylamino)quinoline-3- carbonitrile::US11066414, Compound 757	5	aid1805683	Gilead Sciences, Inc.	124181590
1059336	InChI=1S/C33H37ClN8O/c1-6-33(11-12-33)42-18-27(39-40-42)30(23-8-7-9-24-22(23)10-13-41(5)31(24)43)38-21-14-25-28(37-19-32(2,3)4)20(16-35)17-36-29(25)26(34)15-21/h7-10,13-15,17-18,30,38-40H,6,11-12,19H2,1-5H3,(H,36,37)/t30-/m0/s1	(S)-8-chloro-6-(((1-(1- ethylcyclopropyl)-1H-1,2,3- triazol-4-yl)(2-methyl-1- oxo-1,2-dihydroisoquinolin- 5-yl)methyl)amino)-4- (neopentylamino)quinoline- 3-carbonitrile::US11066414, Compound 756	3	aid1805683	Gilead Sciences, Inc.	124181588
1059335	InChI=1S/C29H33ClF4N8/c1-16-19(7-8-23(31)38-16)26(22-13-42(41-40-22)15-28(5,6)29(32,33)34)39-18-9-20-24(37-14-27(2,3)4)17(11-35)12-36-25(20)21(30)10-18/h7-10,12-13,26,39-41H,14-15H2,1-6H3,(H,36,37)/t26-/m0/s1	(S)-8-chloro-6-(((6-fluoro- 2-methylpyridin-3- yl)(1-(3,3,3-trifluoro-2,2- dimethylpropyl)-1H- 1,2,3-triazol-4-yl (Methyl)amino)-4- (neopentylamino)quinoline- 3-carbonitrile::US11066414, Compound 755	25	aid1805683	Gilead Sciences, Inc.	124181587
1059341	InChI=1S/C31H38ClFN8/c1-18-21(8-9-25(33)37-18)28(24-16-41(40-39-24)31(10-11-31)30(5,6)7)38-20-12-22-26(36-17-29(2,3)4)19(14-34)15-35-27(22)23(32)13-20/h8-9,12-13,15-16,28,38-40H,10-11,17H2,1-7H3,(H,35,36)/t28-/m0/s1	(S)-6-(((1-(1-(tert- butyl)cyclopropyl)-1H-1,2,3- triazol-4-yl)(6-fluoro-2-methylpyridin-3- yl)methyl)amino)-8-chloro-4- (neopentylamino)quinoline-3- carbonitrile::US11066414, Compound 761	6	aid1805683	Gilead Sciences, Inc.	124181585
1059330	InChI=1S/C28H32ClF3N8/c1-6-28(31,32)15-40-13-22(38-39-40)26(19-7-8-23(30)36-16(19)2)37-18-9-20-24(35-14-27(3,4)5)17(11-33)12-34-25(20)21(29)10-18/h7-10,12-13,26,37-39H,6,14-15H2,1-5H3,(H,34,35)/t26-/m0/s1	(S)-8-chloro-6-(((1-(2,2- ifluorobutyl)-1H- 1,2,3-triazol-4-yl)(6-fluoro-2- methylpyridin- 3-yl)methyl)amino)-4- (neopentylamino)quinoline-3- carbonitrile::US11066414, Compound 750	11	aid1805683	Gilead Sciences, Inc.	124181584
1059329	InChI=1S/C27H30ClF3N8/c1-15-18(6-7-22(29)35-15)25(21-12-39(38-37-21)14-27(5,30)31)36-17-8-19-23(34-13-26(2,3)4)16(10-32)11-33-24(19)20(28)9-17/h6-9,11-12,25,36-38H,13-14H2,1-5H3,(H,33,34)/t25-/m0/s1	(S)-8-chloro-6-(((1-(2,2- difluoropropyl)-1H- 1,2,3-triazol-4-yl)(6-fluoro-2- methylpyridin- 3-yl)methyl)amino)-4- (neopentylamino)quinoline-3 -carbonitrile::US11066414, Compound 749	6	aid1805683	Gilead Sciences, Inc.	124181583
1059325	InChI=1S/C31H33ClN8O/c1-31(2,3)17-35-27-18(14-33)15-34-28-24(27)12-19(13-25(28)32)36-29(26-16-40(38-37-26)20-8-9-20)22-6-5-7-23-21(22)10-11-39(4)30(23)41/h5-7,10-13,15-16,20,29,36-38H,8-9,17H2,1-4H3,(H,34,35)/t29-/m0/s1	(S)-8-chloro-6-(((1-cyclopropyl-1H-1,2,3- triazol-4-yl)(2-methyl-1-oxo-1,2- dihydroisoquinolin-5-yl)methyl)amino)-4- (neopentylamino)quinoline-3-carbonitrile::US11066414, Compound 745	2	aid1805683	Gilead Sciences, Inc.	124181579
1059314	InChI=1S/C30H29ClF3N9/c1-28(2,3)16-39-24-17(13-35)14-38-25-20(24)11-18(12-21(25)31)40-27(19-5-4-6-22-26(19)37-10-9-36-22)23-15-43(42-41-23)29(7-8-29)30(32,33)34/h4-6,9-12,14-15,27,40-42H,7-8,16H2,1-3H3,(H,38,39)/t27-/m0/s1	(S)-8-chloro-4-(neopentylamino)- 6-((quinoxalin-5- yl(1-(1-(trifluoromethyl)- cyclopropyl)-1H-1,2,3- triazol-4-yl)methyl)amino)quinoline- 3-carbonitrile::US11066414, Compound 734	41	aid1805683	Gilead Sciences, Inc.	124181576
1059331	InChI=1S/C29H31ClF4N8/c1-16-19(5-6-23(31)38-16)26(22-13-42(41-40-22)15-28(7-8-28)29(32,33)34)39-18-9-20-24(37-14-27(2,3)4)17(11-35)12-36-25(20)21(30)10-18/h5-6,9-10,12-13,26,39-41H,7-8,14-15H2,1-4H3,(H,36,37)/t26-/m0/s1	(S)-8-chloro-6-(((6-fluoro- 2-methylpyridin-3- yl)(1-((1-(trifluoromethyl)- cyclopropyl)methyl)- 1H-1,2,3-triazol-4- yl)methyl)amino)-4- (neopentylamino)quinoline- 3-carbonitrile::US11066414, Compound 751	15	aid1805683	Gilead Sciences, Inc.	124181571
1059327	InChI=1S/C32H37ClN8O/c1-31(2,3)18-36-27-19(15-34)16-35-28-24(27)13-20(14-25(28)33)37-29(26-17-41(39-38-26)32(4,5)6)22-9-8-10-23-21(22)11-12-40(7)30(23)42/h8-14,16-17,29,37-39H,18H2,1-7H3,(H,35,36)/t29-/m0/s1	(S)-6-(((1-(tert-butyl)-1H- 1,2,3-triazol-4-yl)(2- methyl-1-oxo-1,2-dihydroisoquinolin-5- yl)methyl)amino)-8-chloro-4- (neopentylamino)quinoline- 3-carbonitrile::US11066414, Compound 747	4	aid1805683	Gilead Sciences, Inc.	124181568
1059323	InChI=1S/C33H33ClF4N8O/c1-32(2,3)17-41-27-18(13-39)14-40-28-23(27)11-19(12-24(28)34)42-29(25-15-46(44-43-25)33(8-9-33)31(37)38)21-5-4-6-22-20(21)7-10-45(30(22)47)16-26(35)36/h4-7,10-12,14-15,26,29,31,42-44H,8-9,16-17H2,1-3H3,(H,40,41)/t29-/m0/s1	(S)-8-chloro-6-(((2-(2,2- difluoroethyl)-1-oxo-1,2- dihydroisoquinolin-5-yl)(1-(1- (difluoromethyl)cyclopropyl)- 1H-1,2,3-triazol-4- yl)methyl)amino)-4- (neopentylamino)quinoline- 3-carbonitrile::US11066414, Compound 743	5	aid1805683	Gilead Sciences, Inc.	124181567
1059311	InChI=1S/C29H27ClF6N8/c1-15-18(3-4-22(31)40-15)25(21-13-44(43-42-21)28(7-8-28)26(32)33)41-17-9-19-23(16(11-37)12-38-24(19)20(30)10-17)39-14-27(5-2-6-27)29(34,35)36/h3-4,9-10,12-13,25-26,41-43H,2,5-8,14H2,1H3,(H,38,39)/t25-/m0/s1	(S)-8-chloro-6-(((1-(1- (difluoromethyl)cyclopropyl)- 1H-1,2,3-triazol-4-yl)(6-fluoro- 2-methylpyridin-3- yl)methyl)amino)-4-(((1- (trifluoromethyl)cyclobutyl)- methyl)amino)quinoline- 3-carbonitrile::US11066414, Compound 731	11	aid1805683	Gilead Sciences, Inc.	124181562
1059317	InChI=1S/C31H33ClF2N8O/c1-30(2,3)16-37-25-17(12-35)13-36-26-21(25)10-18(11-23(26)32)38-27(19-6-5-7-20-22(19)14-41(4)28(20)43)24-15-42(40-39-24)31(8-9-31)29(33)34/h5-7,10-11,13,15,27,29,38-40H,8-9,14,16H2,1-4H3,(H,36,37)/t27-/m0/s1	(S)-8-chloro-6-(((1-(1- (difluoromethyl)cyclopropyl)- 1H-1,2,3-triazol-4-yl)(2-methyl- 1-oxoisoindolin-4- yl)methyl)amino)-4- (neopentylamino)quinoline-3- carbonitrile::US11066414, Compound 737	3	aid1805683	Gilead Sciences, Inc.	124181561
1059310	InChI=1S/C33H30ClF5N8O/c1-46-11-6-20-21(4-2-5-22(20)29(46)48)28(25-16-47(45-44-25)32(9-10-32)30(35)36)43-19-12-23-26(18(14-40)15-41-27(23)24(34)13-19)42-17-31(7-3-8-31)33(37,38)39/h2,4-6,11-13,15-16,28,30,43-45H,3,7-10,17H2,1H3,(H,41,42)/t28-/m0/s1	(S)-8-chloro-6-(((1-(1- (difluoromethyl)cyclopropyl)- 1H-1,2,3-triazol-4-yl)(2-methyl- 1-oxo-1,2- dihydroisoquinolin-5- yl)methyl)amino)-4-(((1- (trifluoromethyl)cyclobutyl)methyl)- amino)quinoline- 3-carbonitrile::US11066414, Compound 730	10	aid1805683	Gilead Sciences, Inc.	124181560
1059309	InChI=1S/C29H33ClF2N8O/c1-16-19(6-7-23(36-16)41-5)26(22-14-40(39-38-22)29(8-9-29)27(31)32)37-18-10-20-24(35-15-28(2,3)4)17(12-33)13-34-25(20)21(30)11-18/h6-7,10-11,13-14,26-27,37-39H,8-9,15H2,1-5H3,(H,34,35)/t26-/m0/s1	(S)-8-chloro-6-(((1-(1- (difluoromethyl)cyclopropyl)- 1H-1,2,3-triazol-4-yl)(6-methoxy- 2-methylpyridin- 3-yl)methyl)amino)-4- (neopentylamino)quinoline- 3-carbonitrile::US11066414, Compound 729	5	aid1805683	Gilead Sciences, Inc.	124181558
1059307	InChI=1S/C28H27ClF6N8/c1-14-17(4-5-21(30)39-14)24(20-12-43(42-41-20)27(6-7-27)25(31)32)40-16-8-18-22(38-13-26(2,3)28(33,34)35)15(10-36)11-37-23(18)19(29)9-16/h4-5,8-9,11-12,24-25,40-42H,6-7,13H2,1-3H3,(H,37,38)/t24-/m0/s1	(S)-8-chloro-6-(((1-(1- (difluoromethyl)cyclopropyl)- 1H-1,2,3-triazol-4-yl)(6- fluoro-2-methylpyridin-3- yl)methyl)amino)-4- ((3,3,3-trifluoro-2,2- dimethylpropyl)amino)quinoline-3- carbonitrile::US11066414, Compound 727	3	aid1805683	Gilead Sciences, Inc.	124181557
1059308	InChI=1S/C32H34ClN9O/c1-31(2,3)16-36-26-19(13-34)14-35-28-23(26)8-20(9-24(28)33)38-29(25-15-42(40-39-25)32-10-18(11-32)12-32)21-6-5-7-22-27(21)37-17-41(4)30(22)43/h5-9,14-15,17-18,29,38-40H,10-12,16H2,1-4H3,(H,35,36)/t18?,29-,32?/m0/s1	(S)-6-(((1-(bicyclo[1.1.1]pentan-1-yl)-1H- 1,2,3-triazol-4-yl)(3-methyl-4-oxo-3,4- dihydroquinazolin-8- yl)methyl)amino)-8-chloro- 4-(neopentylamino)quinoline-3- carbonitrile::US11066414, Compound 728	7	aid1805683	Gilead Sciences, Inc.	124181555
1059304	InChI=1S/C32H30ClF5N8O/c1-30(2,32(36,37)38)16-41-25-17(13-39)14-40-26-22(25)11-18(12-23(26)33)42-27(24-15-46(44-43-24)31(8-9-31)29(34)35)20-5-4-6-21-19(20)7-10-45(3)28(21)47/h4-7,10-12,14-15,27,29,42-44H,8-9,16H2,1-3H3,(H,40,41)/t27-/m0/s1	(S)-8-chloro-6-(((1-(1- (difluoromethyl)cyclopropyl)- 1H-1,2,3-triazol-4- yl)(2-methyl-1-oxo-1,2- dihydroisoquinolin-5- yl)methyl)amino)-4-((3,3,3-trifluoro-2,2- dimethylpropyl)amino)quinoline- 3-carbonitrile::US11066414, Compound 724	3	aid1805683	Gilead Sciences, Inc.	124181551
1059302	InChI=1S/C28H29ClF4N8O2S/c1-15-18(5-6-22(30)37-15)25(21-13-41(40-39-21)27(7-8-27)28(31,32)33)38-17-9-19-23(36-14-26(2,3)44(4,42)43)16(11-34)12-35-24(19)20(29)10-17/h5-6,9-10,12-13,25,38-40H,7-8,14H2,1-4H3,(H,35,36)/t25-/m0/s1	(S)-8-chloro-6-(((6-fluoro- 2-methylpyridin-3- yl)(1-(1-(trifluoromethyl)- cyclopropyl)-1H-1,2,3- triazol-4-yl)methyl)amino) -4-((2-methyl-2- (methylsulfonyl)propyl)amino)- quinoline-3- carbonitrile::US11066414, Compound 722	43	aid1805683	Gilead Sciences, Inc.	124181549
1059301	InChI=1S/C28H26ClF7N8/c1-14-17(4-5-21(30)40-14)24(20-12-44(43-42-20)26(6-7-26)28(34,35)36)41-16-8-18-22(39-13-25(2,3)27(31,32)33)15(10-37)11-38-23(18)19(29)9-16/h4-5,8-9,11-12,24,41-43H,6-7,13H2,1-3H3,(H,38,39)/t24-/m0/s1	(S)-8-chloro-6-(((6-fluoro-2- methylpyridin-3- yl)(1-(1- (trifluoromethyl)cyclopropyl)- 1H-1,2,3- triazol-4-yl)methyl)amino)-4- ((3,3,3-trifluoro-2,2- dimethylpropyl)amino)quinoline- 3-carbonitrile::US11066414, Compound 721	6	aid1805683	Gilead Sciences, Inc.	124181548
1059300	InChI=1S/C28H29ClF4N8/c1-15-18(5-6-22(30)37-15)25(21-13-41(40-39-21)27(4)7-8-27)38-17-9-19-23(36-14-26(2,3)28(31,32)33)16(11-34)12-35-24(19)20(29)10-17/h5-6,9-10,12-13,25,38-40H,7-8,14H2,1-4H3,(H,35,36)/t25-/m0/s1	(S)-8-chloro-6-(((6-fluoro-2- methylpyridin-3- yl)(1-(1-methylcyclopropyl)- 1H-1,2,3-triazol- 4-yl)methyl)amino)-4- ((3,3,3-trifluoro-2,2- dimethylpropyl)amino)- quinoline-3-carbonitrile::US11066414, Compound 720	2	aid1805683	Gilead Sciences, Inc.	124181547
1059299	InChI=1S/C29H29ClF4N8/c1-15-19(4-5-23(31)38-15)26(22-13-42(41-40-22)28-8-16(9-28)10-28)39-18-6-20-24(37-14-27(2,3)29(32,33)34)17(11-35)12-36-25(20)21(30)7-18/h4-7,12-13,16,26,39-41H,8-10,14H2,1-3H3,(H,36,37)/t16?,26-,28?/m0/s1	(S)-6-(((1-(bicyclo[1.1.1]pentan- 1-yl)-1H-1,2,3- triazol-4-yl)(6-fluoro-2- methylpyridin-3- yl)methyl)amino)-8-chloro-4- ((3,3,3-trifluoro-2,2- dimethylpropyl)amino)quinoline- 3-carbonitrile::US11066414, Compound 719	2	aid1805683	Gilead Sciences, Inc.	124181546
1059296	InChI=1S/C27H30ClFN8/c1-15-19(7-8-23(29)33-15)26(22-13-37(36-35-22)18-5-6-18)34-17-9-20-24(32-14-27(2,3)4)16(11-30)12-31-25(20)21(28)10-17/h7-10,12-13,18,26,34-36H,5-6,14H2,1-4H3,(H,31,32)/t26-/m0/s1	(S)-8-chloro-6-(((1-cyclopropyl- 1H-1,2,3-triazol-4- yl)(6-fluoro-2-methylpyridin-3- yl)methyl)amino)- 4-(neopentylamino)quinoline- 3-carbonitrile::US11066414, Compound 716	2	aid1805683	Gilead Sciences, Inc.	124181545
1059298	InChI=1S/C28H30Cl2F2N8/c1-15-18(5-6-22(30)36-15)25(21-13-40(39-38-21)28(7-8-28)26(31)32)37-17-9-19-23(35-14-27(2,3)4)16(11-33)12-34-24(19)20(29)10-17/h5-6,9-10,12-13,25-26,37-39H,7-8,14H2,1-4H3,(H,34,35)/t25-/m0/s1	(S)-8-chloro-6-(((6-chloro-2- methylpyridin-3-yl)(1- (1-(difluoromethyl)cyclopropyl)- 1H-1,2,3-triazol- 4-yl)methyl)amino)-4- (neopentylamino)quinoline- 3-carbonitrile::US11066414, Compound 718	9	aid1805683	Gilead Sciences, Inc.	124181544
1059290	InChI=1S/C31H29Cl2F3N8/c1-29(2,3)16-40-25-17(13-37)14-39-27-21(25)11-18(12-23(27)33)41-28(20-6-7-22(32)26-19(20)5-4-10-38-26)24-15-44(43-42-24)30(8-9-30)31(34,35)36/h4-7,10-12,14-15,28,41-43H,8-9,16H2,1-3H3,(H,39,40)/t28-/m0/s1	(S)-8-chloro-6-(((8- chloroquinolin-5-yl)(1-(1- (trifluoromethyl)cyclopropyl)- 1H-1,2,3-triazol- 4-yl)methyl)amino)-4- (neopentylamino)quinoline- 3-carbonitrile::US11066414, Compound 709::US11066414, Compound 921	17	aid1805683	Gilead Sciences, Inc.	124181535
1059289	InChI=1S/C32H31F2N9/c1-31(2,3)18-39-28-22(15-36)16-38-27-21(14-35)11-23(13-24(27)28)40-29(20-7-6-19-5-4-10-37-25(19)12-20)26-17-43(42-41-26)32(8-9-32)30(33)34/h4-7,10-13,16-17,29-30,40-42H,8-9,18H2,1-3H3,(H,38,39)/t29-/m0/s1	(S)-6-(((1-(1- (difluoromethyl)cyclopropyl)-1H- 1,2,3-triazol-4-yl)(quinolin- 7-yl)methyl)amino)- 4-(neopentylamino)quinoline- 3,8-dicarbonitrile::US11066414, Compound 708::US11066414, Compound 818	6	aid1805683	Gilead Sciences, Inc.	124181532
1059288	InChI=1S/C28H29ClF3IN8/c1-14-17(5-6-20(30)37-14)23(24-25(33)41(40-39-24)28(7-8-28)26(31)32)38-16-9-18-21(36-13-27(2,3)4)15(11-34)12-35-22(18)19(29)10-16/h5-6,9-10,12,23,26,38-40H,7-8,13H2,1-4H3,(H,35,36)/t23-/m0/s1	(S)-8-chloro-6-(((1-(1- (difluoromethyl)cyclopropyl)- 5-iodo-1H-1,2,3-triazol-4-yl)(6-fluoro-2- methylpyridin-3-yl)methyl)amino)-4- (neopentylamino)quinoline-3- carbonitrile::US11066414, Compound 707::US11066414, Compound 945	16	aid1805683	Gilead Sciences, Inc.	124181530
1059278	InChI=1S/C33H33N9/c1-32(2,3)19-38-30-22(16-35)17-37-29-21(15-34)10-23(11-26(29)30)39-31(25-6-4-8-27-24(25)7-5-9-36-27)28-18-42(41-40-28)33-12-20(13-33)14-33/h4-11,17-18,20,31,39-41H,12-14,19H2,1-3H3,(H,37,38)/t20?,31-,33?/m0/s1	(S)-6-(((1-(bicyclo[1.1.1)pentan- 1-yl)-1H-1,2,3- triazol-4-yl)(quinolin-5- yl)methyl)amino)-4- (neopentylamino)quinoline- 3,8-dicarbonitrile::US11066414, Compound 697	1	aid1805683	Gilead Sciences, Inc.	124181529
1059284	InChI=1S/C34H35N9/c1-33(2,3)20-39-31-23(16-36)18-38-30-22(15-35)13-25(14-28(30)31)40-32(27-6-4-5-21-17-37-12-9-26(21)27)29-19-43(42-41-29)34(10-11-34)24-7-8-24/h4-6,9,12-14,17-19,24,32,40-42H,7-8,10-11,20H2,1-3H3,(H,38,39)/t32-/m0/s1	(S)-6-(((1-([1,1'-bi(cyclopropan)]- 1-yl)-1H-1,2,3- triazol-4-yl)(isoquinolin-5- yl)methyl)amino)-4- (neopentylamino)quinoline- 3,8-dicarbonitrile::US11066414, Compound 703	2	aid1805683	Gilead Sciences, Inc.	124181527
1059287	InChI=1S/C33H33N9/c1-32(2,3)19-38-30-23(15-35)17-37-29-22(14-34)9-24(10-27(29)30)39-31(26-6-4-5-21-16-36-8-7-25(21)26)28-18-42(41-40-28)33-11-20(12-33)13-33/h4-10,16-18,20,31,39-41H,11-13,19H2,1-3H3,(H,37,38)/t20?,31-,33?/m0/s1	(S)-6-(((1-(bicyclo[1.1.1]pentan- 1-yl)-1H-1,2,3-triazol- 4-yl)(isoquinolin-5-yl)methyl)amino)-4- (neopentylamino)quinoline- 3,8-dicarbonitrile::US11066414, Compound 706	2	aid1805683	Gilead Sciences, Inc.	124181526
1059286	InChI=1S/C32H33F2N9/c1-31(2,3)18-39-28-21(14-36)16-38-27-20(13-35)11-22(12-25(27)28)40-29(24-8-6-7-19-15-37-10-9-23(19)24)26-17-43(42-41-26)32(4,5)30(33)34/h6-12,15-17,29-30,40-42H,18H2,1-5H3,(H,38,39)/t29-/m0/s1	(S)-6-(((1-(1,1-difluoro- 2-methylpropan-2-yl)- 1H-1,2,3-triazol-4-yl)(isoquinolin-5- yl)methyl)amino)-4- (neopentylamino)quinoline- 3,8-dicarbonitrile::US11066414, Compound 705	6	aid1805683	Gilead Sciences, Inc.	124181525
1059282	InChI=1S/C26H28ClF3N8S/c1-14-23(39-13-34-14)22(19-11-38(37-36-19)25(5-6-25)26(28,29)30)35-16-7-17-20(33-12-24(2,3)4)15(9-31)10-32-21(17)18(27)8-16/h7-8,10-11,13,22,35-37H,5-6,12H2,1-4H3,(H,32,33)/t22-/m1/s1	(R)-8-chloro-6-(((4- methylthiazol-5-yl)(1-(1- (trifluoromethyl)cyclopropyl)- 1H-1,2,3-triazol- 4-yl)methyl)airiino)-4- (neopentylamino)quinoline- 3-carbonitrile::US11066414, Compound 701	10	aid1805683	Gilead Sciences, Inc.	124181524
1059280	InChI=1S/C31H31ClF2N8/c1-30(2,3)17-38-26-20(14-35)15-37-28-22(26)12-21(13-23(28)32)39-27(19-7-6-18-5-4-10-36-24(18)11-19)25-16-42(41-40-25)31(8-9-31)29(33)34/h4-7,10-13,15-16,27,29,39-41H,8-9,17H2,1-3H3,(H,37,38)/t27-/m0/s1	(S)-8-chloro-6-(((1-(1- (difluoromethyl)cyclopropyl)- 1H-1,2,3-triazol-4-yl)(quinolin-7- yl)methyl)amino)- 4-(neopentylamino)quinoline-3- carbonitrile::US11066414, Compound 699	12	aid1805683	Gilead Sciences, Inc.	124181522
1059279	InChI=1S/C31H30ClF3N8/c1-29(2,3)17-39-26-20(14-36)15-38-28-22(26)12-21(13-23(28)32)40-27(19-7-6-18-5-4-10-37-24(18)11-19)25-16-43(42-41-25)30(8-9-30)31(33,34)35/h4-7,10-13,15-16,27,40-42H,8-9,17H2,1-3H3,(H,38,39)/t27-/m0/s1	(S)-8-chloro-4-(neopentylamino)- 6-((quinolin-7- yl(1-(1-(trifluoromethyl)cyclopropyl)- 1H-1,2,3- triazol-4- yl)methyl)amino)quinoline-3- carbonitrile::US11066414, Compound 698	27	aid1805683	Gilead Sciences, Inc.	124181520
1059272	InChI=1S/C33H35ClN8/c1-32(2,3)19-38-29-20(16-35)17-37-30-25(29)14-22(15-26(30)34)39-31(24-6-4-8-27-23(24)7-5-13-36-27)28-18-42(41-40-28)33(11-12-33)21-9-10-21/h4-8,13-15,17-18,21,31,39-41H,9-12,19H2,1-3H3,(H,37,38)/t31-/m0/s1	(S)-6-(((1-([1,1'-bi(cyclopropan)]- 1-yl)-1H- 1,2,3-triazol-4-yl)(quinolin-5- yl)methyl)amino)- 8-chloro-4-(neopentylamino)quinoline-3- carbonitrile::US11066414, Compound 691	6	aid1805683	Gilead Sciences, Inc.	124181518
1059273	InChI=1S/C30H30ClFN8/c1-30(2,3)16-36-27-17(13-33)14-35-28-21(27)10-18(11-22(28)31)37-29(25-15-40(39-38-25)26-12-23(26)32)20-6-4-8-24-19(20)7-5-9-34-24/h4-11,14-15,23,26,29,37-39H,12,16H2,1-3H3,(H,35,36)/t23-,26+,29-/m0/s1	8-chloro-6-(((SH l-((lR,2S)-2- fluorocyclopropyl)- 1H-1,2,3-triazol-4-yl)(quinolin-5- yl)methyl)amino)-4- (neopentylamino)quinoline- 3-carbonitrile::US11066414, Compound 692	3	aid1805683	Gilead Sciences, Inc.	124181513
1059266	InChI=1S/C32H33ClN8/c1-31(2,3)18-37-28-21(14-34)16-36-29-25(28)9-22(10-26(29)33)38-30(24-6-4-5-20-15-35-8-7-23(20)24)27-17-41(40-39-27)32-11-19(12-32)13-32/h4-10,15-17,19,30,38-40H,11-13,18H2,1-3H3,(H,36,37)/t19?,30-,32?/m0/s1	(S)-6-(((1-(bicyclo[1.1.1]pentan- 1-yl)-1H-1,2,3- triazol-4-yl)(isoquinolin-5- yl)methyl)amino)- 8-chloro-4- (neopentylamino)quinoline-3- carbonitrile::US11066414, Compound 685	4	aid1805683	Gilead Sciences, Inc.	124181511
1059276	InChI=1S/C32H33ClN8/c1-31(2,3)18-37-28-20(15-34)16-36-29-24(28)10-21(11-25(29)33)38-30(23-6-4-8-26-22(23)7-5-9-35-26)27-17-41(40-39-27)32-12-19(13-32)14-32/h4-11,16-17,19,30,38-40H,12-14,18H2,1-3H3,(H,36,37)/t19?,30-,32?/m0/s1	(S)-6-(((1-(bicyclo[1.1.1)pentan-1-yl)-1H- 1,2,3-triazol-4-yl)(quinolin-5- yl)methyl)amino)-8-chloro-4- (neopentylamino)quinoline-3-carbonitrile::US11066414, Compound 695	3	aid1805683	Gilead Sciences, Inc.	124181510
1059268	InChI=1S/C29H32ClF3N8/c1-16-6-7-20(17(2)37-16)26(23-14-41(40-39-23)28(8-9-28)29(31,32)33)38-19-10-21-24(36-15-27(3,4)5)18(12-34)13-35-25(21)22(30)11-19/h6-7,10-11,13-14,26,38-40H,8-9,15H2,1-5H3,(H,35,36)/t26-/m0/s1	(S)-8-chloro-6-(((2,6- dimethylpyridin-3-yl)(1- (1-(trifluoromethyl)cyclopropyl)- 1H-1,2,3- triazol-4-yl)methyl)amino)-4- (neopentylamino)quinoline-3- carbonitrile::US11066414, Compound 687	15	aid1805683	Gilead Sciences, Inc.	124181507
1059265	InChI=1S/C31H34ClFN8/c1-30(2,3)18-37-27-20(13-34)15-36-28-24(27)11-21(12-25(28)32)38-29(26-16-41(40-39-26)31(4,5)17-33)23-8-6-7-19-14-35-10-9-22(19)23/h6-12,14-16,29,38-40H,17-18H2,1-5H3,(H,36,37)/t29-/m0/s1	(S)-8-chloro-6-(((1-(1-fluoro-2- methylpropan-2-yl)- 1H-1,2,3-triazol-4-yl)(isoquinolin-5- yl)methyl)amino)-4- (neopentylamino)quinoline- 3-carbonitrile::US11066414, Compound 684	14	aid1805683	Gilead Sciences, Inc.	124181505
1059264	InChI=1S/C31H33ClF2N8/c1-30(2,3)17-38-26-19(13-35)15-37-27-23(26)11-20(12-24(27)32)39-28(22-8-6-7-18-14-36-10-9-21(18)22)25-16-42(41-40-25)31(4,5)29(33)34/h6-12,14-16,28-29,39-41H,17H2,1-5H3,(H,37,38)/t28-/m0/s1	(S)-8-chloro-6-(((1-(1,1-difluoro- 2-methylpropan- 2-yl)-1H-1,2,3-triazol-4- yl)(isoquinolin-5- yl)methyl)amino)-4- (neopentylamino)quinoline- 3-carbonitrile::US11066414, Compound 683	35	aid1805683	Gilead Sciences, Inc.	124181504
1059262	InChI=1S/C28H29F2N9/c1-15-20(7-8-22(29)35-15)25(26-27(30)39(38-37-26)19-5-6-19)36-18-9-16(11-31)23-21(10-18)24(17(12-32)13-33-23)34-14-28(2,3)4/h7-10,13,19,25,36-38H,5-6,14H2,1-4H3,(H,33,34)/t25-/m0/s1	(S)-6-(((1-cyclopropyl-5-fluoro- 1H-1,2,3-triazol- 4-yl)(6-fluoro-2-methylpyridin-3- yl)methyl)amino)-4- (neopentylamino)quinoline- 3,8-dicarbonitrile::US11066414, Compound 681	2	aid1805683	Gilead Sciences, Inc.	124181503
1059258	InChI=1S/C27H30F2N10/c1-26(2,3)15-33-23-17(12-31)13-32-22-16(11-30)9-18(10-19(22)23)35-24(21-5-8-34-38(21)4)20-14-39(37-36-20)27(6-7-27)25(28)29/h5,8-10,13-14,24-25,35-37H,6-7,15H2,1-4H3,(H,32,33)/t24-/m1/s1	(S)-6-(((1-(l-(difluoromethyl)- cyclopropyl)-1H- 1,2,3-triazol-4-yl)(1-methyl- 1H-pyrazol-5- yl)methyl)amino)-4- (neopentylamino)quinoline- 3,8-dicarbonitrile::US11066414, Compound 677	4	aid1805683	Gilead Sciences, Inc.	124181500
1059253	InChI=1S/C32H30F3N9/c1-31(2,3)17-40-28-19(13-37)14-39-27-18(12-36)10-20(11-23(27)28)41-29(22-4-5-25(33)24-15-38-9-6-21(22)24)26-16-44(43-42-26)32(7-8-32)30(34)35/h4-6,9-11,14-16,29-30,41-43H,7-8,17H2,1-3H3,(H,39,40)/t29-/m0/s1	(S)-6-(((H1-(difluoromethyl)cyclopropyl)- 1H-1,2,3-triazol-4-yl)(8-fluoroisoquinolin- 5-yl)methyl)amino)-4- (neopentylamino)quinoline-3,8- dicarbonitrile::US11066414, Compound 672	2	aid1805683	Gilead Sciences, Inc.	124181499
1059259	InChI=1S/C27H29F3N10/c1-25(2,3)15-34-23-17(12-32)13-33-22-16(11-31)9-18(10-19(22)23)36-24(21-5-8-35-39(21)4)20-14-40(38-37-20)26(6-7-26)27(28,29)30/h5,8-10,13-14,24,36-38H,6-7,15H2,1-4H3,(H,33,34)/t24-/m1/s1	(S)-6-(((1-methyl-1H-pyrazol-5-yl)(1-(1- (trifluoromethyl)cyclopropyl)-1H-1,2,3- triazol-4-yl)methyl)amino)-4- (neopentylamino)quinoline-3,8- dicarbonitrile::US11066414, Compound 678	5	aid1805683	Gilead Sciences, Inc.	124181498
1059263	InChI=1S/C33H35ClN8/c1-32(2,3)19-38-29-21(15-35)17-37-30-26(29)13-23(14-27(30)34)39-31(25-6-4-5-20-16-36-12-9-24(20)25)28-18-42(41-40-28)33(10-11-33)22-7-8-22/h4-6,9,12-14,16-18,22,31,39-41H,7-8,10-11,19H2,1-3H3,(H,37,38)/t31-/m0/s1	(S)-6-(((4-(1-(1-bi(cyclopropan)]- 1-yl)-1H-1,2,3- triazol-4-yl)(isoquinolin-5- yl)methyl)amino)-8- chloro-4-(neopentylamino)quinoline-3- carbonitrile::US11066414, Compound 682	7	aid1805683	Gilead Sciences, Inc.	124181496
1059255	InChI=1S/C28H31F2N9O/c1-15-22(35-16(2)40-15)25(21-13-39(38-37-21)28(6-7-28)26(29)30)36-19-8-17(10-31)23-20(9-19)24(18(11-32)12-33-23)34-14-27(3,4)5/h8-9,12-13,25-26,36-38H,6-7,14H2,1-5H3,(H,33,34)/t25-/m1/s1	(S)-6-(((1-(1-(difluoromethyl)- cyclopropyl)-1H- 1,2,3-triazol-4-yl)(2,5-dimethyloxazol-4- yl)methyl)amino)-4- (neopentylamino)quinoline- 3,8-dicarbonitrile::US11066414, Compound 674	22	aid1805683	Gilead Sciences, Inc.	124181494
1059251	InChI=1S/C33H29F3N10/c1-31(2,3)18-42-29-21(14-39)15-41-28-20(13-38)10-22(11-25(28)29)43-30(24-5-4-19(12-37)26-16-40-9-6-23(24)26)27-17-46(45-44-27)32(7-8-32)33(34,35)36/h4-6,9-11,15-17,30,43-45H,7-8,18H2,1-3H3,(H,41,42)/t30-/m0/s1	(S)-6-(((8-cyanoisoquinolin-5-yl)(1-(1- (trifluoromethyl)cyclopropyl)- 1H-1,2,3-triazol- 4-yl)methyl)amino)-4- (neopentylamino)quinoline-3,8- dicarbonitrile::US11066414, Compound 670	5	aid1805683	Gilead Sciences, Inc.	124181491
1059252	InChI=1S/C32H30F3N9/c1-31(2,3)17-40-27-19(14-37)15-39-26-18(13-36)11-20(12-23(26)27)41-29(22-6-7-24(33)28-21(22)5-4-10-38-28)25-16-44(43-42-25)32(8-9-32)30(34)35/h4-7,10-12,15-16,29-30,41-43H,8-9,17H2,1-3H3,(H,39,40)/t29-/m0/s1	(S)-6-(((1-(1- (difluoromethyl)cyciopropy])-1H- 1,2,3-triazol-4-yl)(8- fluoroquinolin-5- yl)methyl)amino)-4- (neopentylamino)quinoline- 3,8-dicarbonitrile::US11066414, Compound 671	2	aid1805683	Gilead Sciences, Inc.	124181490
1059249	InChI=1S/C33H32F3N9/c1-19-8-11-39-25-7-5-6-23(27(19)25)30(26-17-45(44-43-26)32(9-10-32)33(34,35)36)42-22-12-20(14-37)28-24(13-22)29(21(15-38)16-40-28)41-18-31(2,3)4/h5-8,11-13,16-17,30,42-44H,9-10,18H2,1-4H3,(H,40,41)/t30-/m0/s1	(S)-6-(((4-methylquinolin-5-yl)(4-(1- (trifluoromethyl)cyclopropyl)-1H-1,2,3- triazol-4-yl)methyl)amino)-4- (neopentylamino)quinoline-3,8- dicarbonitrile::US11066414, Compound 668	13	aid1805683	Gilead Sciences, Inc.	124181489
1059242	InChI=1S/C27H28F3N9O/c1-15-19(5-6-22(28)35-15)25(21-12-39(38-37-21)27(29,30)14-40)36-18-7-16(9-31)23-20(8-18)24(17(10-32)11-33-23)34-13-26(2,3)4/h5-8,11-12,25,36-38,40H,13-14H2,1-4H3,(H,33,34)/t25-/m0/s1	(S)-6-(((1-(1,1-difluoro-2 -hydroxyethyl)-1 H-1,2,3- triazol-4-yl)(6-fluoro-2-methylpyridin-3- yl)methyl)amino)-4- (neopentylamino)quinoline- 3,8-dicarbonitrile::US11066414, Compound 661	2	aid1805683	Gilead Sciences, Inc.	124181488
1059246	InChI=1S/C26H30ClF2N9/c1-25(2,3)14-32-21-15(11-30)12-31-22-17(21)9-16(10-18(22)27)34-23(20-5-8-33-37(20)4)19-13-38(36-35-19)26(6-7-26)24(28)29/h5,8-10,12-13,23-24,34-36H,6-7,14H2,1-4H3,(H,31,32)/t23-/m1/s1	(S)-8-chloro-6-(((1-(1- (difluoromethyl)cyclopropyl)-1H- 1,2,3-triazol-4-yl)(1-methyl- 1H-pyrazol-5- yl)methyl)amino)-4- (neopentylamino)quinoline- 3-carbonitrile::US11066414, Compound 665	6	aid1805683	Gilead Sciences, Inc.	124181486
1059245	InChI=1S/C31H31F3N10/c1-29(2,3)17-39-26-19(14-36)15-38-25-18(13-35)11-20(12-23(25)26)40-27(21-5-9-37-28-22(21)6-10-43(28)4)24-16-44(42-41-24)30(7-8-30)31(32,33)34/h5-6,9-12,15-16,27,40-42H,7-8,17H2,1-4H3,(H,38,39)/t27-/m0/s1	(S)-6-(((1-methyl-1H- pyrrolo[2,3-b]pyridin-4- yl)(1-(1-(trifluoromethyl)cyclopropyl)- 1H-1,2,3- triazol-4-yl)methyl)amino)-4- (neopentylamino)quinoline-3,8- dicarbonitrile::US11066414, Compound 664	12	aid1805683	Gilead Sciences, Inc.	124181484
1059244	InChI=1S/C27H29ClF2N8/c1-14-18(7-8-21(29)34-14)24(25-26(30)38(37-36-25)17-5-6-17)35-16-9-19-22(33-13-27(2,3)4)15(11-31)12-32-23(19)20(28)10-16/h7-10,12,17,24,35-37H,5-6,13H2,1-4H3,(H,32,33)/t24-/m0/s1	(S)-8-chloro-6-(((1-cyclopropyl- 5-fluoro-1H-1,2,3- triazol-4-yl)(6-fluoro-2-methylpyridin-3- yl)methyl)amino)-4- (neopentylamino)quinoline- 3-carbonitrile::US11066414, Compound 663	3	aid1805683	Gilead Sciences, Inc.	124181483
1059237	InChI=1S/C34H32F2N10/c1-34(2,3)19-40-32-21(14-38)15-39-31-20(13-37)11-22(12-24(31)32)42-33(23-7-5-10-30-25(23)16-41-45(30)4)29-18-46(44-43-29)17-26-27(35)8-6-9-28(26)36/h5-12,15-16,18,33,42-44H,17,19H2,1-4H3,(H,39,40)/t33-/m0/s1	(S)-6-(((H2,6-difluorobenzyl)- 1H-1,2,3-triazol-4- yl)(1-methyl-1H-indazol-4- yl)methyl)amino)-4- (neopentylamino)quinoline- 3,8-dicarbonitrile::US11066414, Compound 656	4	aid1805683	Gilead Sciences, Inc.	124181475
1059238	InChI=1S/C27H29F2N9O/c1-15-24(39-14-34-15)23(20-12-38(37-36-20)27(5-6-27)25(28)29)35-18-7-16(9-30)21-19(8-18)22(17(10-31)11-32-21)33-13-26(2,3)4/h7-8,11-12,14,23,25,35-37H,5-6,13H2,1-4H3,(H,32,33)/t23-/m1/s1	(R)-6-(((1-(1-(difluoromethyl)- cyclopropyl)-1H- 1,2,3-triazol-4-yl)(4- methyloxazol-5- yl)methyl)amino)-4- (neopentylamino)quinoline- 3,8-dicarbonitrile::US11066414, Compound 657	37	aid1805683	Gilead Sciences, Inc.	124181474
1059234	InChI=1S/C31H30ClF3N8/c1-30(2,3)16-39-25-17(13-36)14-38-26-21(25)11-18(12-22(26)32)40-28(20-6-7-23(33)27-19(20)5-4-10-37-27)24-15-43(42-41-24)31(8-9-31)29(34)35/h4-7,10-12,14-15,28-29,40-42H,8-9,16H2,1-3H3,(H,38,39)/t28-/m0/s1	(S)-8-chloro-6-(((1-(1- (difluoromethyl)cyclopropyl)- 1H-1,2,3-triazol-4-yl)(8- fluoroquinolin-5- yl)methyl)amino)-4- (neopentylamino)quinoline- 3-carbonitrile::US11066414, Compound 653	4	aid1805683	Gilead Sciences, Inc.	124181471
1059233	InChI=1S/C31H30ClF3N8/c1-30(2,3)16-39-26-17(12-36)13-38-27-21(26)10-18(11-23(27)32)40-28(20-4-5-24(33)22-14-37-9-6-19(20)22)25-15-43(42-41-25)31(7-8-31)29(34)35/h4-6,9-11,13-15,28-29,40-42H,7-8,16H2,1-3H3,(H,38,39)/t28-/m0/s1	(S)-8-chloro-6-(((1-(1- (difluoromethyl)cyclopropyl)- 1H-1,2,3-triazol-4-yl)(8- fluoroisoquinolin-5- yl)methyl)amino)-4- (neopentylamino)quinoline-3- carbonitrile::US11066414, Compound 652	4	aid1805683	Gilead Sciences, Inc.	124181470
1059232	InChI=1S/C31H29Cl2F3N8/c1-29(2,3)16-40-26-17(12-37)13-39-27-21(26)10-18(11-24(27)33)41-28(20-4-5-23(32)22-14-38-9-6-19(20)22)25-15-44(43-42-25)30(7-8-30)31(34,35)36/h4-6,9-11,13-15,28,41-43H,7-8,16H2,1-3H3,(H,39,40)/t28-/m0/s1	(S)-8-chloro-6-(((8-chloroisoquinolin- 5-yl)(1-(1- (trifluoromethyl)cyclopropyl)-1H- 1,2,3-triazol-4- yl)methyl)amino)-4- (neopentylamino)quinoline-3- carbonitrile::US11066414, Compound 651	14	aid1805683	Gilead Sciences, Inc.	124181468
1059230	InChI=1S/C30H32FN9/c1-17-22(5-6-25(31)36-17)28(24-15-40(39-38-24)30-9-18(10-30)11-30)37-21-7-19(12-32)26-23(8-21)27(20(13-33)14-34-26)35-16-29(2,3)4/h5-8,14-15,18,28,37-39H,9-11,16H2,1-4H3,(H,34,35)/t18?,28-,30?/m0/s1	(S)-6-(((1-(bicyclo[1.1.1]pentan- 1-yl)-1H-1,2,3- triazol-4-yl)(6-fluoro-2- methylpyridin-3- yl)methyl)amino)-4- (neopentylamino)quinoline- 3,8-dicarbonitrile::US11066414, Compound 649	2	aid1805683	Gilead Sciences, Inc.	124181464
1059227	InChI=1S/C29H32ClFN8/c1-16-20(5-6-24(31)35-16)27(23-14-39(38-37-23)29-9-17(10-29)11-29)36-19-7-21-25(34-15-28(2,3)4)18(12-32)13-33-26(21)22(30)8-19/h5-8,13-14,17,27,36-38H,9-11,15H2,1-4H3,(H,33,34)/t17?,27-,29?/m0/s1	(S)-6-(((1-(bicyclo[1.1.1]pentan- 1-yl)-1H-1,2,3- triazol-4-yl)(6-fluoro- 2-meth ylpyridin-3- yl)methyl)amino)-8-chloro-4- (neopentylamino)quinoline- 3-carbonitrile::US11066414, Compound 646	3	aid1805683	Gilead Sciences, Inc.	124181461
1059223	InChI=1S/C31H35FN10O/c1-18-22(7-8-25(32)37-18)28(24-16-42(40-39-24)31(9-10-31)29(43)41(5)6)38-21-11-19(13-33)26-23(12-21)27(20(14-34)15-35-26)36-17-30(2,3)4/h7-8,11-12,15-16,28,38-40H,9-10,17H2,1-6H3,(H,35,36)/t28-/m0/s1	(S)-1-(4-(((3,8-dicyano-4- (neopentylamino)quinolin- 6-yl)amino)(6-fluoro-2- methylpyridin-3-yl)methyl)- 1H-1,2,3-triazol-1-yl)-N,N- dimethylcyclopropane-1- carboxamide::US11066414, Compound 642	5	aid1805683	Gilead Sciences, Inc.	124181459
1059221	InChI=1S/C27H29F2N9S/c1-15-24(39-14-34-15)23(20-12-38(37-36-20)27(5-6-27)25(28)29)35-18-7-16(9-30)21-19(8-18)22(17(10-31)11-32-21)33-13-26(2,3)4/h7-8,11-12,14,23,25,35-37H,5-6,13H2,1-4H3,(H,32,33)/t23-/m1/s1	(R)-6-(((1-(1-(difluoromethyl)- cyclopropyl)-1H-1,2,3- triazol-4-yl)(4-methylthiazol-5- yl)methyl)amino)-4- (neopentylamino)quinoline- 3,8-dicarbonitrile::US11066414, Compound 640	3	aid1805683	Gilead Sciences, Inc.	124181457
1059224	InChI=1S/C27H29ClFIN8/c1-14-18(7-8-21(29)34-14)24(25-26(30)38(37-36-25)17-5-6-17)35-16-9-19-22(33-13-27(2,3)4)15(11-31)12-32-23(19)20(28)10-16/h7-10,12,17,24,35-37H,5-6,13H2,1-4H3,(H,32,33)/t24-/m0/s1	(S)-8-chloro-6-(((1-cyclopropyl-S- iodo-1H-1,2,3-triazol- 4-yl)(6-lluoro-2-methylpyridin- 3-yl)methyl)amino)- 4-(neopentylamino)quinoline-3- carbonitrile::US11066414, Compound 643	5	aid1805683	Gilead Sciences, Inc.	124181454
1059219	InChI=1S/C29H25F6N9/c1-15-19(2-3-22(30)40-15)25(21-13-44(43-42-21)28(6-7-28)29(33,34)35)41-18-8-16(10-36)23-20(9-18)24(17(11-37)12-38-23)39-14-27(4-5-27)26(31)32/h2-3,8-9,12-13,25-26,41-43H,4-7,14H2,1H3,(H,38,39)/t25-/m0/s1	(S)-4-(((1-(difluoromethyl)- cyclopropyl)methyl)amino)- 6-(((6-fluoro-2-methylpyridin- 3-yl)(1-(1- (trifluoromethyl)cyclopropyl)- 1H-1,2,3-triazol-4- yl)methyl)amino)quinoline- 3,8-dicarbonitrile::US11066414, Compound 638	58	aid1805683	Gilead Sciences, Inc.	124181453
1059216	InChI=1S/C28H28Cl2F4N8/c1-15-18(4-5-22(31)38-15)25(21-12-42(41-40-21)27(6-7-27)28(32,33)34)39-17-8-19-23(37-14-26(2,3)13-29)16(10-35)11-36-24(19)20(30)9-17/h4-5,8-9,11-12,25,39-41H,6-7,13-14H2,1-3H3,(H,36,37)/t25-/m0/s1	(S)-8-chloro-4-((3-chloro-2,2- dimethylpropyl)amino)-6-(((6-fluoro-2- methylpyridin-3-yl)(1-(1- (trifluoromethyl)cyclopropyl)-1H-1,2,3- triazol-4-yl)methyl)amino)quinoline-3- carbonitrile::US11066414, Compound 635	3	aid1805683	Gilead Sciences, Inc.	124181452
1059214	InChI=1S/C28H26ClF4N9/c1-15-18(4-5-22(30)38-15)25(21-12-42(41-40-21)27(6-7-27)28(31,32)33)39-17-8-19-23(37-14-26(2,3)13-35)16(10-34)11-36-24(19)20(29)9-17/h4-5,8-9,11-12,25,39-41H,6-7,14H2,1-3H3,(H,36,37)/t25-/m0/s1	(S)-8-chloro-4-((2-cyano-2- methylpropyl)amino)- 6-(((6-fluoro-2-methylpyridin-3-yl)(1-(1- (trifluoromethyl)cyclopropyl)- 1H-1,2,3-triazol- 4-yl)methyl)amino)quinoline-3- carbonitrile::US11066414, Compound 633	28	aid1805683	Gilead Sciences, Inc.	124181450
1059205	InChI=1S/C29H30ClF3N8O2/c1-15-18(5-6-22(31)37-15)25(21-11-41(40-39-21)28(26(42)43)12-29(32,33)13-28)38-17-7-19-23(36-14-27(2,3)4)16(9-34)10-35-24(19)20(30)8-17/h5-8,10-11,25,38-40H,12-14H2,1-4H3,(H,35,36)(H,42,43)/t25-/m0/s1	(S)-1-(4-(((8-chloro-3-cyano-4- (neopentylamino)quinolin-6- yl)amino)(6-fluoro- 2-methylpyridin-3-yl)methyl)- 1H-1,2,3-triazol- 1-yl)-3,3-difluorocyclobutane- 1-carboxylic acid::US11066414, Compound 624	11	aid1805683	Gilead Sciences, Inc.	124181447
1059211	InChI=1S/C26H29ClF2N8O/c1-14-23(38-13-33-14)22(19-11-37(36-35-19)26(5-6-26)24(28)29)34-16-7-17-20(32-12-25(2,3)4)15(9-30)10-31-21(17)18(27)8-16/h7-8,10-11,13,22,24,34-36H,5-6,12H2,1-4H3,(H,31,32)/t22-/m1/s1	(R)-8-chloro-6-(((1-(1- (difluoromethyl)cyclopropyl)- 1H-1,2,3- triazol-4-yl)(4-methyloxazol- 5-yl)methyl)amino)- 4-(neopentylamino)quinoline- 3-carbonitrile::US11066414, Compound 630	68	aid1805683	Gilead Sciences, Inc.	124181445
1059208	InChI=1S/C32H29F4N9/c1-30(2,3)17-41-27-19(14-38)15-40-26-18(13-37)11-20(12-23(26)27)42-29(22-6-7-24(33)28-21(22)5-4-10-39-28)25-16-45(44-43-25)31(8-9-31)32(34,35)36/h4-7,10-12,15-16,29,42-44H,8-9,17H2,1-3H3,(H,40,41)/t29-/m0/s1	(S)-6-(((8-fluoroquinolin-5-yl)(1-(1-(trifluoro- methyl)cyclopropyl)-1H-1,2,3-triazol-4- yl)methyl)amino)-4- (neopentylamino)quinoline- 3,8-dicarbonitrile::US11066414, Compound 627	4	aid1805683	Gilead Sciences, Inc.	124181444
1059206	InChI=1S/C29H33F2N9/c1-17-21(7-8-24(31)36-17)27(23-14-40(39-38-23)29(5,6)15-30)37-20-9-18(11-32)25-22(10-20)26(19(12-33)13-34-25)35-16-28(2,3)4/h7-10,13-14,27,37-39H,15-16H2,1-6H3,(H,34,35)/t27-/m0/s1	(S)-6-(((1-{1-fluoro-2- methylpropan-2-yl)-1H- 1,2,3-triazol-4-yl)(6-fluoro- 2-methylpyridin-3- yl)methyl)amino)-4- (neopentylamino)quinoline- 3,8-dicarbonitrile::US11066414, Compound 625	2	aid1805683	Gilead Sciences, Inc.	124181441
1059207	InChI=1S/C32H29F4N9/c1-30(2,3)17-41-28-19(13-38)14-40-27-18(12-37)10-20(11-23(27)28)42-29(22-4-5-25(33)24-15-39-9-6-21(22)24)26-16-45(44-43-26)31(7-8-31)32(34,35)36/h4-6,9-11,14-16,29,42-44H,7-8,17H2,1-3H3,(H,40,41)/t29-/m0/s1	(S)-6-(((8-fluoroisoquinolin-5-yl)(1-(1-(1- (trifluoromethyl)cyclopropyl)-1H-1,2,3- triazol-4-yl)methyl)amino)-4-(neopentyl- amino)quinoline-3,8-dicarbonitrile::US11066414, Compound 626	5	aid1805683	Gilead Sciences, Inc.	124181438
1059204	InChI=1S/C28H31F2N9/c1-16(10-29)39-14-23(37-38-39)27(21-6-7-24(30)35-17(21)2)36-20-8-18(11-31)25-22(9-20)26(19(12-32)13-33-25)34-15-28(3,4)5/h6-9,13-14,16,27,36-38H,10,15H2,1-5H3,(H,33,34)/t16-,27-/m0/s1	6-(((S)-(6-fluoro-2- methylpyridin-3-yl)(1-((S)- 1-fluoropropan-2-yl)-1H-1,2,3-triazol-4- yl)methyl)amino)-4- (neopentylamino)quinoline- 3,8-dicarbonitrile::US11066414, Compound 623	1	aid1805683	Gilead Sciences, Inc.	124181437
1059202	InChI=1S/C31H34FN9/c1-18-23(7-8-26(32)37-18)29(25-16-41(40-39-25)31(9-10-31)21-5-6-21)38-22-11-19(13-33)27-24(12-22)28(20(14-34)15-35-27)36-17-30(2,3)4/h7-8,11-12,15-16,21,29,38-40H,5-6,9-10,17H2,1-4H3,(H,35,36)/t29-/m0/s1	(S)-6-(((1-([1,1'-bi(cyclopropan)]- 1-yl)-1H-1,2,3- triazol-4-yl)(6-fluoro-2-methylpyridin-3- yl)methyl)amino)-4- (neopentylamino)quinoline- 3,8-dicarbonitrile::US11066414, Compound 621	1	aid1805683	Gilead Sciences, Inc.	124181436
1059198	InChI=1S/C31H29ClF4N8/c1-29(2,3)16-40-25-17(13-37)14-39-26-21(25)11-18(12-22(26)32)41-28(20-6-7-23(33)27-19(20)5-4-10-38-27)24-15-44(43-42-24)30(8-9-30)31(34,35)36/h4-7,10-12,14-15,28,41-43H,8-9,16H2,1-3H3,(H,39,40)/t28-/m0/s1	(S)-8-chloro-6-(((8-fluoroquinolin-5-yl)(1-(1- (trifluoromethyl)cyclopropyl)-1H-1,2,3-triazol- 4-yl)methyl)amino)-4- (neopentylamino)quinoline-3-carbonitrile::US11066414, Compound 617	9	aid1805683	Gilead Sciences, Inc.	124181432
1059197	InChI=1S/C31H29ClF4N8/c1-29(2,3)16-40-26-17(12-37)13-39-27-21(26)10-18(11-23(27)32)41-28(20-4-5-24(33)22-14-38-9-6-19(20)22)25-15-44(43-42-25)30(7-8-30)31(34,35)36/h4-6,9-11,13-15,28,41-43H,7-8,16H2,1-3H3,(H,39,40)/t28-/m0/s1	(S)-8-chloro-6-(((8-fluoroisoquinolin-5-yl)(1- (1-(trifluoromethyl)cyclopropyl)-1H-1,2,3- triazol-4-yl)methyl)amino)-4- (neopentylamino)quinoline-3-carbonitrile::US11066414, Compound 616	12	aid1805683	Gilead Sciences, Inc.	124181431
1059196	InChI=1S/C29H26F4N10/c1-16-20(4-5-23(30)39-16)26(22-13-43(42-41-22)28(6-7-28)29(31,32)33)40-19-8-17(10-34)24-21(9-19)25(18(11-35)12-37-24)38-15-27(2,3)14-36/h4-5,8-9,12-13,26,40-42H,6-7,15H2,1-3H3,(H,37,38)/t26-/m0/s1	(S)-4-((2-cyano-2-methylpropyl)amino)-6- (((6-fluoro-2-methylpyridin-3-yl)(1-(1- (trifluoromethyl)cyclopropyl)-1H-1,2,3-triazol- 4-yl)methyl)amino)quinoline-3,8-dicarbonitrile::US11066414, Compound 615	33	aid1805683	Gilead Sciences, Inc.	124181430
1059191	InChI=1S/C29H32FN9O/c1-17-21(5-6-24(30)35-17)27(23-14-39(38-37-23)29(16-40)7-8-29)36-20-9-18(11-31)25-22(10-20)26(19(12-32)13-33-25)34-15-28(2,3)4/h5-6,9-10,13-14,27,36-38,40H,7-8,15-16H2,1-4H3,(H,33,34)/t27-/m0/s1	(S)-6-(((6-fluoro-2-methylpyridin-3-yl)(1-(1- (hydroxymethyl)cyclopropyl)-1H-1,2,3- triazol-4-yl)methyl)amino)-4- (neopentylamino)quinoline-3,8-dicarbonitrile::US11066414, Compound 610	2	aid1805683	Gilead Sciences, Inc.	124181429
1059194	InChI=1S/C34H29F4N9/c1-19-25(9-10-28(35)42-19)32(27-18-47(46-45-27)33(11-12-33)34(36,37)38)43-24-13-22(15-39)30-26(14-24)31(23(16-40)17-41-30)44-29(21-7-8-21)20-5-3-2-4-6-20/h2-6,9-10,13-14,17-18,21,29,32,43,45-46H,7-8,11-12H2,1H3,(H,41,44)/t29-,32-/m0/s1	4-(((R)-cyclopropyl(phenyl)methyl)amino)- 6-(((S)-(6-fluoro-2-methylpyridin-3-yl)(1- (1-(trifluoromethyl)cyclopropyl)-1H-1,2,3- triazol-4-yl)methyl)amino)quinoline-3,8- dicarbonitrile::US11066414, Compound 613	13	aid1805683	Gilead Sciences, Inc.	124181427
1059193	InChI=1S/C33H31ClF4N8/c1-19-23(9-10-27(35)42-19)30(26-17-46(45-44-26)32(11-12-32)33(36,37)38)43-22-13-24-28(20(15-39)16-40-29(24)25(34)14-22)41-18-31(2,3)21-7-5-4-6-8-21/h4-10,13-14,16-17,30,43-45H,11-12,18H2,1-3H3,(H,40,41)/t30-/m0/s1	(S)-8-chloro-6-(((6-fluoro-2-methylpyridin-3- yl)(1-(1-(trifluoromethyl)cyclopropyl)-1H- 1,2,3-triazol-4-yl)methyl)amino)-4-((2- methyl-2-phenylpropyl)amino)quinoline-3- carbonitrile::US11066414, Compound 612	11	aid1805683	Gilead Sciences, Inc.	124181426
1059192	InChI=1S/C33H29ClF4N8/c1-18-23(9-10-27(35)41-18)31(26-17-46(45-44-26)32(11-12-32)33(36,37)38)42-22-13-24-29(21(15-39)16-40-30(24)25(34)14-22)43-28(20-7-8-20)19-5-3-2-4-6-19/h2-6,9-10,13-14,16-17,20,28,31,42,44-45H,7-8,11-12H2,1H3,(H,40,43)/t28-,31-/m0/s1	8-chloro-4-(((R)-cyclopropyl(phenyl)methyl)- amino)-6-(((S)-(6-fluoro-2-methylpyridin-3- yl)(1-(1-(trifluoromethyl)cyclopropyl)-1H- 1,2,3-triazol-4-yl)methyl)amino)quinoline-3- carbonitrile::US11066414, Compound 611	20	aid1805683	Gilead Sciences, Inc.	124181425
1059190	InChI=1S/C30H32N10/c1-30(2,3)17-34-28-19(13-32)14-33-27-18(12-31)10-20(11-23(27)28)36-29(25-16-40(38-37-25)21-8-9-21)22-6-5-7-26-24(22)15-35-39(26)4/h5-7,10-11,14-16,21,29,36-38H,8-9,17H2,1-4H3,(H,33,34)/t29-/m0/s1	(S)-6-(((1-cyclopropyl-1H-1,2,3- triazol-4-yl)(1- methyl-1H-indazol-4-yl)methyl)amino)-4- (neopentylamino)quinoline-3,8-dicarbonitrile::US11066414, Compound 609	2	aid1805683	Gilead Sciences, Inc.	124181424
1059186	InChI=1S/C31H32F2N10/c1-30(2,3)17-37-26-20(13-35)14-36-25-19(12-34)10-21(11-23(25)26)39-27(22-7-5-6-18-15-38-42(4)28(18)22)24-16-43(41-40-24)31(8-9-31)29(32)33/h5-7,10-11,14-16,27,29,39-41H,8-9,17H2,1-4H3,(H,36,37)/t27-/m0/s1	(S)-6-(((Ml-(difluoromethyl)cyclopropyl)-1H- 1,2,3-triazol-4-yl)(1-methyl-1H-indazol-7- yl)methyl)amino)-4- (neopentylamino)quinoline- 3,8-dicarbonitrile::US11066414, Compound 605	3	aid1805683	Gilead Sciences, Inc.	124181422
1059182	InChI=1S/C32H30F3N9/c1-18-22(8-9-28(35)40-18)31(27-16-44(43-42-27)15-24-25(33)6-5-7-26(24)34)41-21-10-19(12-36)29-23(11-21)30(20(13-37)14-38-29)39-17-32(2,3)4/h5-11,14,16,31,41-43H,15,17H2,1-4H3,(H,38,39)/t31-/m0/s1	(S)-6-(((1-(2,6-difluorobenzyl)-1H-1,2,3- triazol-4-yl)(6-fluoro-2-methylpyridin-3- yl)methyl)amino)-4- (neopentylamino)quinoline-3,8- dicarbonitrile::US11066414, Compound 601	4	aid1805683	Gilead Sciences, Inc.	124181416
1059180	InChI=1S/C29H29ClF3N9/c1-27(2,3)15-37-24-17(11-34)12-36-25-20(24)9-18(10-21(25)30)38-26(19-5-4-8-41-16-35-13-23(19)41)22-14-42(40-39-22)28(6-7-28)29(31,32)33/h4-5,8-10,12-14,16,26,38-40H,6-7,15H2,1-3H3,(H,36,37)/t26-/m0/s1	(S)-8-chloro-6- ((imidazo[1,5-a]pyridin-8-yl(1- (1-(trifluoromethyl)cyclopropyl)-1H-1,2,3- triazol-4-yl)methyl)amino)-4- (neopentylamino)quinoline-3-carbonitrile::US11066414, Compound 599	13	aid1805683	Gilead Sciences, Inc.	124181414
1059178	InChI=1S/C30H32F3N9/c1-5-22-20(6-7-24(31)39-22)27(23-15-42(41-40-23)30(8-9-30)28(32)33)38-19-10-17(12-34)25-21(11-19)26(18(13-35)14-36-25)37-16-29(2,3)4/h6-7,10-11,14-15,27-28,38,40-41H,5,8-9,16H2,1-4H3,(H,36,37)/t27-/m0/s1	(S)-6-(((1-(1- (difluoromethyl)cyclopropyl)-1H- 1,2,3-triazol-4-yl)(2-ethyl-6- fluoropyridin-3- yl)methyl)amino)-4- (neopentylamino)quinoline- 3,8-dicarbonitrile::US11066414, Compound 597	3	aid1805683	Gilead Sciences, Inc.	124181412
1059172	InChI=1S/C29H31F4N9/c1-16-20(7-8-23(30)38-16)26(22-14-42(41-40-22)28(5,6)29(31,32)33)39-19-9-17(11-34)24-21(10-19)25(18(12-35)13-36-24)37-15-27(2,3)4/h7-10,13-14,26,39-41H,15H2,1-6H3,(H,36,37)/t26-/m0/s1	(S)-6-(((6-fluoro-2-methylpyridin-3-yl)(1- (1,1,1-trifluoro-2-methylpropan-2-yl)-1H- 1,2,3-triazol-4-yl)methyl)amino)-4- (neopentylamino)quinoline-3,8- dicarbonitrile::US11066414, Compound 591	5	aid1805683	Gilead Sciences, Inc.	124181409
1059175	InChI=1S/C31H32ClFN8/c1-30(2,3)18-37-27-20(13-34)14-36-28-23(27)11-21(12-25(28)32)38-29(22-6-4-5-19-7-10-35-15-24(19)22)26-16-41(40-39-26)31(17-33)8-9-31/h4-7,10-12,14-16,29,38-40H,8-9,17-18H2,1-3H3,(H,36,37)/t29-/m0/s1	(S)-8-chloro-6-(((1-(1- (fluoromethyl)cyclopropyl)- 1H-1,2,3-triazol-4-yl)(isoquinolin-8- yl)methyl)amino)-4- (neopentylamino)quinoline- 3-carbonitrile::US11066414, Compound 594	2	aid1805683	Gilead Sciences, Inc.	124181408
1059174	InChI=1S/C29H31ClF4N8/c1-5-21-18(6-7-23(31)39-21)26(22-14-42(41-40-22)28(8-9-28)29(32,33)34)38-17-10-19-24(37-15-27(2,3)4)16(12-35)13-36-25(19)20(30)11-17/h6-7,10-11,13-14,26,38,40-41H,5,8-9,15H2,1-4H3,(H,36,37)/t26-/m0/s1	(S)-8-chloro-6-(((2-ethyl-6- fluoropyridin-3-yl)(1- (1-(trifluoromethyl)cyclopropyl)-1H-1,2,3- triazol-4-yl)methyl)amino)-4- (neopentylamino)quinoline-3-carbonitrile::US11066414, Compound 593	8	aid1805683	Gilead Sciences, Inc.	124181406
1059171	InChI=1S/C29H32F3N9/c1-16-20(7-8-23(30)37-16)26(22-14-41(40-39-22)29(5,6)27(31)32)38-19-9-17(11-33)24-21(10-19)25(18(12-34)13-35-24)36-15-28(2,3)4/h7-10,13-14,26-27,38-40H,15H2,1-6H3,(H,35,36)/t26-/m0/s1	(S)-6-(((1-(1,1-difluoro-2- methylpropan-2-yl)- 1H-1,2,3-triazol-4-yl)(6- fluoro-2-methylpyridin- 3-yl)methyl)amino)-4-(neopentylamino)- quinoline-3,8-dicarbonitrile::US11066414, Compound 590	3	aid1805683	Gilead Sciences, Inc.	124181404
1059168	InChI=1S/C33H34N10O/c1-32(2,3)19-39-29-22(15-35)17-38-28-21(14-34)12-23(13-26(28)29)40-30(25-7-4-6-20-16-37-11-8-24(20)25)27-18-43(42-41-27)33(31(36)44)9-5-10-33/h4,6-8,11-13,16-18,30,40-42H,5,9-10,19H2,1-3H3,(H2,36,44)(H,38,39)/t30-/m0/s1	(S)-1-(4-(((3,8-dicyano-4- (neopentylamino)- quinolin-6-yl)amino)(isoquinolin- 5-yl)methyl)- 1H-1,2,3-triazol-1- yl)cyclobutane-1-carboxamide::US11066414, Compound 587	1	aid1805683	Gilead Sciences, Inc.	124181401
1059170	InChI=1S/C29H34FN9/c1-17-21(8-9-24(30)35-17)27(23-15-39(38-37-23)29(5,6)7)36-20-10-18(12-31)25-22(11-20)26(19(13-32)14-33-25)34-16-28(2,3)4/h8-11,14-15,27,36-38H,16H2,1-7H3,(H,33,34)/t27-/m0/s1	(S)-6-(((1-(tert-butyl)- 1H-1,2,3-triazol-4-yl)(6- fluoro-2-methylpyridin-3- yl)methyl)amino)-4- (neopentylamino)quinoline- 3,8-dicarbonitrile::US11066414, Compound 589	2	aid1805683	Gilead Sciences, Inc.	124181400
1059167	InChI=1S/C32H32N10O/c1-31(2,3)18-38-28-21(14-34)16-37-27-20(13-33)11-22(12-25(27)28)39-29(24-6-4-5-19-15-36-10-7-23(19)24)26-17-42(41-40-26)32(8-9-32)30(35)43/h4-7,10-12,15-17,29,39-41H,8-9,18H2,1-3H3,(H2,35,43)(H,37,38)/t29-/m0/s1	(S)-1-(4-(((3,8-dicyano-4- (neopentylamino)- quinolin-6-yl)atnino)(isoquinolin- 5-yl)methyl)- 1H-1,2,3-triazol-yl)cyclopropane- 1-carboxamide::US11066414, Compound 586	2	aid1805683	Gilead Sciences, Inc.	124181397
1059169	InChI=1S/C29H29ClF4N8/c1-16-20(7-8-24(31)37-16)27(23-15-42(41-40-23)28(9-10-28)29(32,33)34)39-19-11-21-25(38-18-5-3-2-4-6-18)17(13-35)14-36-26(21)22(30)12-19/h7-8,11-12,14-15,18,27,39-41H,2-6,9-10H2,1H3,(H,36,38)/t27-/m0/s1	(S)-8-chloro-4-(cyclohexylamino)-6-(((6- fluoro-2-methylpyridin-3-yl)(1-(1- (trifluoromethyl)cyclopropyl)-1H-1,2,3- triazol-4-yl)methyl)amino)quinoline- 3-carbonitrile::US11066414, Compound 588	55	aid1805683	Gilead Sciences, Inc.	124181396
1059166	InChI=1S/C30H29F4N9/c1-17-22(7-8-25(31)38-17)28(24-16-43(42-41-24)29(9-10-29)30(32,33)34)40-21-11-18(13-35)26-23(12-21)27(19(14-36)15-37-26)39-20-5-3-2-4-6-20/h7-8,11-12,15-16,20,28,40-42H,2-6,9-10H2,1H3,(H,37,39)/t28-/m0/s1	(S)-4-(cyclohexylamino)-6-(((6-fluoro-2- methylpyridin-3- yl)(1-(1-(trifluoromethyl)- cyclopropyl)-1H-1,2,3-triazol-4- yl)methyl)amino)quinoline- 3,8-dicarbonitrile::US11066414, Compound 585	37	aid1805683	Gilead Sciences, Inc.	124181395
1059165	InChI=1S/C26H28ClF3N8O/c1-14-17(5-6-21(28)34-14)24(20-11-38(37-36-20)26(29,30)13-39)35-16-7-18-22(33-12-25(2,3)4)15(9-31)10-32-23(18)19(27)8-16/h5-8,10-11,24,35-37,39H,12-13H2,1-4H3,(H,32,33)/t24-/m0/s1	(S)-8-chloro-6-(((1-(i, 1-difluoro-2- hydroxyethyl)-1H-1,2,3-triazol-4-yl)(6- fluoro-2-methylpyridin-3- yl)methyl)amino)- 4-(neopentylamino)quinoline- 3-carbonitrile::US11066414, Compound 584	2	aid1805683	Gilead Sciences, Inc.	124181394
1059163	InChI=1S/C29H31ClF4N8/c1-15-19(6-7-23(31)37-15)26(22-14-42(41-40-22)28(8-9-28)29(32,33)34)39-18-10-20-24(38-16(2)27(3,4)5)17(12-35)13-36-25(20)21(30)11-18/h6-7,10-11,13-14,16,26,39-41H,8-9H2,1-5H3,(H,36,38)/t16-,26+/m1/s1	8-chloro-4-(((R)-3,3- dimethylbutan-2-yl)amino)- 6-(((S)-(6-fluoro-2- methylpyridin-3-yl)(1-(1- (trifluoromethyl)cyclopropyl)- 1H-1,2,3- triazol-4-yl)methyl)amino)quinoline- 3-carbonitrile::US11066414, Compound 582	14	aid1805683	Gilead Sciences, Inc.	124181392
1059162	InChI=1S/C32H33N9/c1-31(2,3)19-37-29-22(15-34)17-36-28-21(14-33)12-23(13-26(28)29)38-30(27-18-41(40-39-27)32(4)9-10-32)25-7-5-6-20-16-35-11-8-24(20)25/h5-8,11-13,16-18,30,38-40H,9-10,19H2,1-4H3,(H,36,37)/t30-/m0/s1	(S)-6-((isoquinolin-5-yl(1-(1-methylcyclo- propyl)-1H-1,2,3-triazol-4-yl)methyl)amino)- 4-(neopentylamino)quinoline-3,8- dicarbonitrile::US11066414, Compound 581	2	aid1805683	Gilead Sciences, Inc.	124181389
1059161	InChI=1S/C32H30N10/c1-31(2,3)19-38-29-22(14-34)16-37-28-21(13-33)11-23(12-26(28)29)39-30(25-6-4-5-20-15-36-10-7-24(20)25)27-17-42(41-40-27)32(18-35)8-9-32/h4-7,10-12,15-17,30,39-41H,8-9,19H2,1-3H3,(H,37,38)/t30-/m0/s1	(S)-6-(((1-(1-cyanocyclopropyl)-1H-1,2,3- triazol-4-yl)(isoquinolin-5- yl)methyl)amino)-4-(neopentylamino)- quinoline-3,8-dicarbonitrile::US11066414, Compound 580	2	aid1805683	Gilead Sciences, Inc.	124181387
1059158	InChI=1S/C32H30N10/c1-31(2,3)19-38-29-21(15-34)16-37-28-20(14-33)12-22(13-25(28)29)39-30(24-6-4-8-26-23(24)7-5-11-36-26)27-17-42(41-40-27)32(18-35)9-10-32/h4-8,11-13,16-17,30,39-41H,9-10,19H2,1-3H3,(H,37,38)/t30-/m0/s1	(S)-6-(((1-(1-cyanocyclopropyl)-1H- 1,2,3-triazol-4-yl)(quinolin-5- yl)methyl)amino)-4-(neopentylamino)- quinoline-3,8-dicarbonitrile::US11066414, Compound 577	1	aid1805683	Gilead Sciences, Inc.	124181383
1059152		(S)-6-(((Hl-(difluoromethyl)cyclopropyl)-1H- 1,2,3-triazol-4-yl)(3-methyl-1H-indazol-4- yl)methyl)amino)-4- (neopentylamino)quinoline-3,8-dicarbonitrile::US11066414, Compound 571	2	aid1805683	Gilead Sciences, Inc.	124181377
1059149	InChI=1S/C31H33ClN8/c1-30(2,3)18-36-27-19(15-33)16-35-28-23(27)13-20(14-24(28)32)37-29(26-17-40(39-38-26)31(4)10-11-31)22-7-5-9-25-21(22)8-6-12-34-25/h5-9,12-14,16-17,29,37-39H,10-11,18H2,1-4H3,(H,35,36)/t29-/m0/s1	(S)-8-chloro-6-(((1-(1-methylcyclopropyl)- 1H-1,2,3-triazol-4-yl)(quinolin-5- yl)methyl)amino)-4-(neopentylamino)- quinoline-3-carbonitrile::US11066414, Compound 568	5	aid1805683	Gilead Sciences, Inc.	124181375
1059144	InChI=1S/C31H30ClN9/c1-30(2,3)18-37-27-20(13-33)15-36-28-24(27)11-21(12-25(28)32)38-29(23-6-4-5-19-14-35-10-7-22(19)23)26-16-41(40-39-26)31(17-34)8-9-31/h4-7,10-12,14-16,29,38-40H,8-9,18H2,1-3H3,(H,36,37)/t29-/m0/s1	(S)-8-chloro-6-(((1-(1-cyanocyclopropyl)- 1H-1,2,3-triazol-4-yl)(isoquinolin-5- yl)methyl)amino)-4-(neopentylamino)- quinoline-3-carbonitrile::US11066414, Compound 563	2	aid1805683	Gilead Sciences, Inc.	124181369
1059143	InChI=1S/C32H34ClN9O/c1-31(2,3)18-38-27-20(14-34)16-37-28-24(27)12-21(13-25(28)33)39-29(23-7-4-6-19-15-36-11-8-22(19)23)26-17-42(41-40-26)32(30(35)43)9-5-10-32/h4,6-8,11-13,15-17,29,39-41H,5,9-10,18H2,1-3H3,(H2,35,43)(H,37,38)/t29-/m0/s1	(S)-1-(4-(((8-chloro-3-cyano-4-(neopentyl- amino)quinolin-6-yl)amino)(isoquinolin-5- yl)methyl)-1H-1,2,3-triazol-1- yl)cyclobutane-1-carboxamide::US11066414, Compound 562	2	aid1805683	Gilead Sciences, Inc.	124181368
1059138	InChI=1S/C31H31F3N10/c1-29(2,3)17-38-27-19(13-36)14-37-26-18(12-35)10-20(11-22(26)27)40-28(21-6-5-7-25-23(21)15-39-43(25)4)24-16-44(42-41-24)30(8-9-30)31(32,33)34/h5-7,10-11,14-16,28,40-42H,8-9,17H2,1-4H3,(H,37,38)/t28-/m0/s1	(S)-6-(((1-methyl-1H-indazol-4- yl)(1-(1-(trifluoro- methyl)cyclopropyl)-1H-1,2,3-triazol-4- yl)methyl)amino)-4-(neopentylamino)- quinoline-3,8-dicarbonitrile::US11066414, Compound 557	5	aid1805683	Gilead Sciences, Inc.	124181363
1059135	InChI=1S/C32H37ClFN9O/c1-19-22(7-8-26(34)38-19)29(25-17-43(41-40-25)32(9-10-32)30(44)42-11-5-6-12-42)39-21-13-23-27(37-18-31(2,3)4)20(15-35)16-36-28(23)24(33)14-21/h7-8,13-14,16-17,29,39-41H,5-6,9-12,18H2,1-4H3,(H,36,37)/t29-/m0/s1	(S)-8-chloro-6-(((6-fluoro-2-methylpyridin- 3-yl)(1-(1-(pyrrolidine-1- carbonyl)cyclopropyl)- 1H-1,2,3-triazol-4-yl)methyl)amino)-4- (neopentylamino)quinoline-3-carbonitrile::US11066414, Compound 554	5	aid1805683	Gilead Sciences, Inc.	124181360
1059134	InChI=1S/C30H35ClFN9O/c1-17-20(7-8-24(32)36-17)27(23-15-41(39-38-23)30(9-10-30)28(42)40(5)6)37-19-11-21-25(35-16-29(2,3)4)18(13-33)14-34-26(21)22(31)12-19/h7-8,11-12,14-15,27,37-39H,9-10,16H2,1-6H3,(H,34,35)/t27-/m0/s1	(S)-1-(4-(((8-chloro-3-cyano-4-(neopentyl- amino)quinolin-6-yl)amino)(6-fluoro-2- methylpyridin-3-yl)methyl)-1H-1,2,3- triazol-1-yl)-N,N-dimethylcyclopropane-1- carboxamide::US11066414, Compound 553	3	aid1805683	Gilead Sciences, Inc.	124181359
1059127	InChI=1S/C27H31ClF2N8/c1-15(10-29)38-13-22(36-37-38)26(19-6-7-23(30)34-16(19)2)35-18-8-20-24(33-14-27(3,4)5)17(11-31)12-32-25(20)21(28)9-18/h6-9,12-13,15,26,35-37H,10,14H2,1-5H3,(H,32,33)/t15-,26-/m0/s1	8-chloro-6-(((S)-(6-fluoro-2- methylpyridin-3-yl)(1-((S)-1-fluoropropan- 2-yl)-1H-1,2,3-triazol-4-yl)methyl)amino)- 4-(neopentylamino)quinoline-3-carbonitrile::US11066414, Compound 546	2	aid1805683	Gilead Sciences, Inc.	124181354
1059129	InChI=1S/C28H29ClF4N8O/c1-15-18(5-6-22(30)37-15)25(21-11-41(40-39-21)27(13-42-14-27)28(31,32)33)38-17-7-19-23(36-12-26(2,3)4)16(9-34)10-35-24(19)20(29)8-17/h5-8,10-11,25,38-40H,12-14H2,1-4H3,(H,35,36)/t25-/m0/s1	(S)-8-chloro-6-(((6-fluoro-2-methylpyridin- 3-yl)(1-(3-(trifluoromethyl)oxetan-3-yl)- 1H-1,2,3-triazol-4-yl)methyl)amino)-4- (neopentylamino)quinoline-3-carbonitrile::US11066414, Compound 548	8	aid1805683	Gilead Sciences, Inc.	124181353
1059128	InChI=1S/C30H34ClFN8/c1-17-21(7-8-25(32)36-17)28(24-15-40(39-38-24)30(9-10-30)19-5-6-19)37-20-11-22-26(35-16-29(2,3)4)18(13-33)14-34-27(22)23(31)12-20/h7-8,11-12,14-15,19,28,37-39H,5-6,9-10,16H2,1-4H3,(H,34,35)/t28-/m0/s1	(S)-6-(((M[i,r-bi(cyclopropan)]-1-yl)-1H- 1,2,3-triazol-4-yl)(6-fluoro-2-methylpyridin- 3-yl)methyl)amino)-8-chloro-4- (neopentylamino)quinoline-3-carbonitrile::US11066414, Compound 547	2	aid1805683	Gilead Sciences, Inc.	124181352
1059126	InChI=1S/C28H32ClF3N8/c1-15-18(7-8-22(30)36-15)25(21-13-40(39-38-21)28(5,6)26(31)32)37-17-9-19-23(35-14-27(2,3)4)16(11-33)12-34-24(19)20(29)10-17/h7-10,12-13,25-26,37-39H,14H2,1-6H3,(H,34,35)/t25-/m0/s1	(S)-8-chloro-6-(((1-(1,1-difluoro-2- methylpropan-2-yl)-1H-1,2,3-triazol-4- yl)(6-fluoro-2-methylpyridin-3-yl)methyl)- amino)-4-(neopentylamino)quinoline-3- carbonitrile::US11066414, Compound 545	4	aid1805683	Gilead Sciences, Inc.	124181347
1059120	InChI=1S/C30H32ClF3N8O/c1-16-19(4-5-24(32)37-16)27(22-14-42(41-40-22)30(7-8-30)28(33)34)38-18-10-20-25(39-23-6-9-43-15-29(23,2)3)17(12-35)13-36-26(20)21(31)11-18/h4-5,10-11,13-14,23,27-28,38,40-41H,6-9,15H2,1-3H3,(H,36,39)/t23-,27+/m1/s1	8-chloro-6-(((S)-(1-(1-(difluoromethyl)- cyclopropyl)-1H-1,2,3-triazol-4-yl)(6- fluoro-2-methylpyridin-3-yl)methyl)- amino)-4-(((R)-3,3-dimethyltetrahydro- 2H-pyran-4-yl)amino)quinoline-3- carbonitrile::US11066414, Compound 539	1	aid1805683	Gilead Sciences, Inc.	124181346
1059119	InChI=1S/C29H30ClF2N9/c1-28(2,3)16-35-24-17(13-33)14-34-25-20(24)11-18(12-21(25)30)37-26(19-5-4-10-40-23(19)6-9-36-40)22-15-41(39-38-22)29(7-8-29)27(31)32/h4-6,9-12,14-15,26-27,37-39H,7-8,16H2,1-3H3,(H,34,35)/t26-/m0/s1	(S)-8-chloro-6-(((1-(1-(difluoromethyl)- cyclopropyl)-1H-1,2,3-triazol-4- yl)(pyrazolo[1,5-a]pyridin-4- yl)methyl)amino)-4-(neopentylamino)- quinoline-3-carbonitrile::US11066414, Compound 538	5	aid1805683	Gilead Sciences, Inc.	124181343
1059122	InChI=1S/C28H31ClF4N8/c1-15-18(7-8-22(30)37-15)25(21-13-41(40-39-21)27(5,6)28(31,32)33)38-17-9-19-23(36-14-26(2,3)4)16(11-34)12-35-24(19)20(29)10-17/h7-10,12-13,25,38-40H,14H2,1-6H3,(H,35,36)/t25-/m0/s1	(S)-8-chloro-6-(((6-fluoro-2-methyl- pyridin-3-yl)(1-(1,1,1-trifluoro-2- methylpropan-2-yl)-1H-1,2,3-triazol-4- yl)methyl)amino)-4-(neopentylamino)- quinoline-3-carbonitrile::US11066414, Compound 541	6	aid1805683	Gilead Sciences, Inc.	124181342
1059116	InChI=1S/C32H30F3N9/c1-30(2,3)18-40-28-21(14-37)15-39-27-20(13-36)11-22(12-24(27)28)41-29(23-6-4-5-19-7-10-38-16-25(19)23)26-17-44(43-42-26)31(8-9-31)32(33,34)35/h4-7,10-12,15-17,29,41-43H,8-9,18H2,1-3H3,(H,39,40)/t29-/m0/s1	(S)-6-((isoquinolin-8-yl(1-(1-(trifluoro- methyl)cyclopropyl)-1H-1,2,3-triazol-4- yl)methyl)amino)-4-(neopentylamino)- quinoline-3,8-dicarbonitrile::US11066414, Compound 535	2	aid1805683	Gilead Sciences, Inc.	124181336
1059112	InChI=1S/C28H33ClF2N8/c1-16-19(7-8-23(31)35-16)26(22-13-39(38-37-22)28(5,6)14-30)36-18-9-20-24(34-15-27(2,3)4)17(11-32)12-33-25(20)21(29)10-18/h7-10,12-13,26,36-38H,14-15H2,1-6H3,(H,33,34)/t26-/m0/s1	(S)-8-chloro-6-(((1-(1-fluoro-2-methyl- propan-2-yl)-1H-1,2,3-triazol-4-yl)(6- fluoro-2-methylpyridin-3-yl)methyl)amino)- 4-(neopentylamino)quinoline-3-carbonitrile::US11066414, Compound 531	3	aid1805683	Gilead Sciences, Inc.	124181334
1059115	InChI=1S/C28H29ClF4N8O/c1-15-18(4-5-22(30)37-15)25(21-12-41(40-39-21)27(6-7-27)28(31,32)33)38-17-8-19-23(36-13-26(2,3)14-42)16(10-34)11-35-24(19)20(29)9-17/h4-5,8-9,11-12,25,38-40,42H,6-7,13-14H2,1-3H3,(H,35,36)/t25-/m0/s1	(S)-8-chloro-6-(((6-fluoro-2-methylpyridin- 3-yl)(1-(1-(trifluoromethyl)cyclopropyl)- 1H-1,2,3-triazol-4-yl)methyl)amino)-4- ((3-hydroxy-2,2-dimethylpropyl)amino)- quinoline-3-carbonitrile::US11066414, Compound 534	20	aid1805683	Gilead Sciences, Inc.	124181333
1059111	InChI=1S/C28H34ClFN8/c1-16-19(8-9-23(30)34-16)26(22-14-38(37-36-22)28(5,6)7)35-18-10-20-24(33-15-27(2,3)4)17(12-31)13-32-25(20)21(29)11-18/h8-11,13-14,26,35-37H,15H2,1-7H3,(H,32,33)/t26-/m0/s1	(S)-6-(((1-(tert-butyl)-1H-1,2,3-triazol-4- yl)(6-fluoro-2-methylpyridin-3-yl)methyl- )amino)-8-chloro-4-(neopentylamino)- quinoline-3-carbonitrile::US11066414, Compound 530	3	aid1805683	Gilead Sciences, Inc.	124181326
1059104	InChI=1S/C31H32F2N10/c1-30(2,3)16-37-26-19(13-35)14-36-25-18(12-34)10-20(11-22(25)26)39-27(21-6-5-7-23-28(21)42(4)17-38-23)24-15-43(41-40-24)31(8-9-31)29(32)33/h5-7,10-11,14-15,17,27,29,39-41H,8-9,16H2,1-4H3,(H,36,37)/t27-/m0/s1	(S)-6-(((Ml-(difluoromethyl)cyclopropyl)- 1H-1,2,3-triazol-4-yl)(1-methyl-1H- benzo[d]imidazol-7-yl)methyl)amino)-4- (neopentylamino)quinoline-3,8- dicarbonitrile::US11066414, Compound 523	2	aid1805683	Gilead Sciences, Inc.	124181318
1059098	InChI=1S/C28H30ClFN8O2/c1-15-18(5-6-22(30)34-15)25(21-13-38(37-36-21)28(7-8-28)26(39)40)35-17-9-19-23(33-14-27(2,3)4)16(11-31)12-32-24(19)20(29)10-17/h5-6,9-10,12-13,25,35-37H,7-8,14H2,1-4H3,(H,32,33)(H,39,40)/t25-/m0/s1	(S)-1-(4-(((8-chloro-3-cyano-4- (neopentylamino)quinolin-6-yl)amino)(6- fluoro-2-methylpyridin-3- yl)methyl)-1H-1,2,3- triazol-1-yl)cyclopropane-1- carboxylic acid::US11066414, Compound 517	3	aid1805683	Gilead Sciences, Inc.	124181313
1059095	InChI=1S/C28H30F4N8/c1-15-18(5-6-22(30)36-15)25(21-13-40(39-38-21)28(7-8-28)26(31)32)37-17-9-19-23(35-14-27(2,3)4)16(11-33)12-34-24(19)20(29)10-17/h5-6,9-10,12-13,25-26,37-39H,7-8,14H2,1-4H3,(H,34,35)/t25-/m0/s1	(S)-6-(((1-(1- (difluoromethyl)cyclopropyl)-1H- 1,2,3-triazol-4-yl)(6-fluoro- 2-methylpyridin-3- yl)methyl)amino)-8-fluoro-4- (neopentylamino)quinoline-3 -carbonitrile::US11066414, Compound 514	4	aid1805683	Gilead Sciences, Inc.	124181310
1059094	InChI=1S/C28H29F5N8/c1-15-18(5-6-22(30)37-15)25(21-13-41(40-39-21)27(7-8-27)28(31,32)33)38-17-9-19-23(36-14-26(2,3)4)16(11-34)12-35-24(19)20(29)10-17/h5-6,9-10,12-13,25,38-40H,7-8,14H2,1-4H3,(H,35,36)/t25-/m0/s1	(S)-8-fluoro-6-(((6-fluoro-2-methylpyridin- 3-yl)(1-(1- (trifluoromethyl)cyclopropyl)-1H- 1,2,3-triazol-4-yl)methyl)amino)-4- (neopentylamino)quinoline-3-carbonitrile::US11066414, Compound 513	9	aid1805683	Gilead Sciences, Inc.	124181309
1059305	InChI=1S/C28H30ClF3N8/c1-15-18(5-6-22(30)36-15)25(21-13-40(39-38-21)28(7-8-28)26(31)32)37-17-9-19-23(35-14-27(2,3)4)16(11-33)12-34-24(19)20(29)10-17/h5-6,9-10,12-13,25-26,37-39H,7-8,14H2,1-4H3,(H,34,35)/t25-/m1/s1	(S)-8-chloro-6-(((1-(1- (difluoromethyl)cyclopropyl)- 1H-1,2,3-triazol-4-yl)(6-fluoro-2- methylpyridin-3- yl)methyl-d)amino)-4-((2,2 -dimethylpropyl-1,1- d2)amino)quinoline-3-carbonitrile::US11066414, Compound 725	3	aid1805683	Gilead Sciences, Inc.	124181304
1059085	InChI=1S/C30H31ClN8/c1-30(2,3)17-35-27-19(13-32)14-34-28-23(27)11-20(12-25(28)31)36-29(26-16-39(38-37-26)21-7-8-21)22-6-4-5-18-9-10-33-15-24(18)22/h4-6,9-12,14-16,21,29,36-38H,7-8,17H2,1-3H3,(H,34,35)/t29-/m0/s1	(S)-8-chloro-6-(((1-cyclopropyl-1H-1,2,3- triazol-4-yl)(isoquinolin-8-yl)methyl)amino)- 4-(neopentylamino)quinoline-3-carbonitrile::US11066414, Compound 504	1	aid1805683	Gilead Sciences, Inc.	124181299
1059076	InChI=1S/C28H31ClF2N8/c1-16-19(5-6-23(31)35-16)26(22-13-39(38-37-22)28(14-30)7-8-28)36-18-9-20-24(34-15-27(2,3)4)17(11-32)12-33-25(20)21(29)10-18/h5-6,9-10,12-13,26,36-38H,7-8,14-15H2,1-4H3,(H,33,34)/t26-/m0/s1	(S)-8-chloro-6-(((6- fluoro-2-methylpyridin- 3-yl)(1-(1- (fluoromethyl)cyclopropyl)-1H- 1,2,3-triazol-4- yl)methyl)amino)-4- (neopentylamino)quinoline- 3-carbonitrile::US11066414, Compound 495	3	aid1805683	Gilead Sciences, Inc.	124181297
1059083	InChI=1S/C29H30ClF3N8/c1-16-19(4-5-23(31)37-16)26(22-14-41(40-39-22)29(8-9-29)27(32)33)38-18-10-20-24(36-15-28(2)6-3-7-28)17(12-34)13-35-25(20)21(30)11-18/h4-5,10-11,13-14,26-27,38-40H,3,6-9,15H2,1-2H3,(H,35,36)/t26-/m0/s1	(S)-8-chloro-6-(((1-(1-(difluoromethyl)- cyclopropyl)-1H-1,2,3-triazol-4-yl)(6- fluoro-2-methylpyridin-3-yl)methyl)- amino)-4-(((1-methylcyclobutyl)methyl)- amino) quinoline-3-carbonitrile::US11066414, Compound 502	6	aid1805683	Gilead Sciences, Inc.	124181296
1059077	InChI=1S/C30H32ClF2N9/c1-29(2,3)16-36-25-17(12-34)13-35-26-20(25)10-18(11-22(26)31)38-27(19-6-5-7-24-21(19)14-37-41(24)4)23-15-42(40-39-23)30(8-9-30)28(32)33/h5-7,10-11,13-15,27-28,38-40H,8-9,16H2,1-4H3,(H,35,36)/t27-/m0/s1	(S)-8-chloro-6-(((1-(1-(difluoromethyl)- cyclopropyl)-1H-1,2,3-triazol-4-yl)(1- methyl-1H-indazol-4-yl)methyl)amino)-4- (neopentylamino)quinoline-3-carbonitrile::US11066414, Compound 496	6	aid1805683	Gilead Sciences, Inc.	124181295
1059070	InChI=1S/C29H29FN10/c1-17-21(5-6-24(30)36-17)27(23-14-40(39-38-23)29(15-33)7-8-29)37-20-9-18(11-31)25-22(10-20)26(19(12-32)13-34-25)35-16-28(2,3)4/h5-6,9-10,13-14,27,37-39H,7-8,16H2,1-4H3,(H,34,35)/t27-/m0/s1	(S)-6-(((1-(1-cyanocyclopropyl)-1H-1,2,3- triazol-4-yl)(6-fluoro-2-methylpyridin-3- yl)methyl)amino)-4-(neopentylamino)- quinoline-3,8-dicarbonitrile::US11066414, Compound 489	2	aid1805683	Gilead Sciences, Inc.	124181292
1059066	InChI=1S/C28H29F2N9/c1-16-19(5-6-23(30)35-16)26(22-13-39(38-37-22)28(14-32)7-8-28)36-18-9-20-24(34-15-27(2,3)4)17(11-31)12-33-25(20)21(29)10-18/h5-6,9-10,12-13,26,36-38H,7-8,15H2,1-4H3,(H,33,34)/t26-/m0/s1	(S)-6-(((1-(1-cyanocyclopropyl)-1H-1,2,3- triazol-4-yl)(6-fluoro-2-methylpyridin-3- yl)methyl)amino)-8-fluoro-4-(neopentyl- amino)quinoline-3-carbonitrile::US11066414, Compound 485	3	aid1805683	Gilead Sciences, Inc.	124181285
1059072	InChI=1S/C30H31FN10/c1-18-22(6-7-25(31)37-18)28(24-15-41(40-39-24)30(16-34)8-5-9-30)38-21-10-19(12-32)26-23(11-21)27(20(13-33)14-35-26)36-17-29(2,3)4/h6-7,10-11,14-15,28,38-40H,5,8-9,17H2,1-4H3,(H,35,36)/t28-/m0/s1	(S)-6-(((1-(1-cyanocyclobutyl)-1H-1,2,3- triazol-4-yl)(6-fluoro-2-methylpyridin-3- yl)methyl)amino)-4-(neopentylamino)- quinoline-3,8-dicarbonitrile::US11066414, Compound 491	3	aid1805683	Gilead Sciences, Inc.	124181284
1059062	InChI=1S/C30H32FN9OS/c1-29(2,3)15-35-24-17(12-32)13-34-25-20(24)10-18(11-21(25)31)37-26(19-6-4-7-22-27(19)42-16-36-22)23-14-40(39-38-23)30(28(33)41)8-5-9-30/h4,6-7,10-11,13-14,16,26,37-39H,5,8-9,15H2,1-3H3,(H2,33,41)(H,34,35)/t26-/m0/s1	(S)-1-(4-(benzo[d]thiazol-7-yl((3-cyano-8- fluoro-4-(neopentylamino)quinolin-6-yl)- amino)methyl)-1H-1,2,3-triazol-1- yl)cyclobutane-1-carboxamide::US11066414, Compound 481	6	aid1805683	Gilead Sciences, Inc.	124181282
1059065	InChI=1S/C31H31F3N10/c1-29(2,3)16-38-26-19(13-36)14-37-25-18(12-35)10-20(11-22(25)26)40-27(21-6-5-7-23-28(21)43(4)17-39-23)24-15-44(42-41-24)30(8-9-30)31(32,33)34/h5-7,10-11,14-15,17,27,40-42H,8-9,16H2,1-4H3,(H,37,38)/t27-/m0/s1	(S)-6-(((1-methyl-1H-benzo[d]imidazol-7- yl)(1-(1-(trifluoromethyl)cyclopropyl)-1H- 1,2,3-triazol-4-yl)methyl)amino)-4- (neopentylamino)quinoline-3,8- dicarbonitrile::US11066414, Compound 484	3	aid1805683	Gilead Sciences, Inc.	124181281
1059071	InChI=1S/C29H31FN10O/c1-16-20(5-6-23(30)36-16)26(22-14-40(39-38-22)29(7-8-29)27(33)41)37-19-9-17(11-31)24-21(10-19)25(18(12-32)13-34-24)35-15-28(2,3)4/h5-6,9-10,13-14,26,37-39H,7-8,15H2,1-4H3,(H2,33,41)(H,34,35)/t26-/m0/s1	(S)-1-(4-(((3,8-dicyano- 4-(neopentylamino)- quinolin-6-yl)amino)(6-fluoro-2- methylpyridin-3-yl)methyl)- 1H-1,2,3-triazol- 1-yl)cyclopropane-1-carboxamide::US11066414, Compound 490	1	aid1805683	Gilead Sciences, Inc.	124181277
1059064	InChI=1S/C30H31ClF3N9/c1-28(2,3)15-37-24-17(12-35)13-36-25-20(24)10-18(11-21(25)31)39-26(19-6-5-7-22-27(19)42(4)16-38-22)23-14-43(41-40-23)29(8-9-29)30(32,33)34/h5-7,10-11,13-14,16,26,39-41H,8-9,15H2,1-4H3,(H,36,37)/t26-/m0/s1	(S)-8-chloro-6-(((1-methyl-1H- benzo[d]imidazol-7-yl)(1-(1- (trifluoromethyl)cyclopropyl)-1H- 1,2,3-triazol-4-yl)methyl)amino)-4- (neopentylamino)quinoline-3- carbonitrile::US11066414, Compound 483	7	aid1805683	Gilead Sciences, Inc.	124181276
1059054	InChI=1S/C29H30F3N9/c1-16-20(5-6-23(30)37-16)26(22-14-41(40-39-22)29(7-8-29)27(31)32)38-19-9-17(11-33)24-21(10-19)25(18(12-34)13-35-24)36-15-28(2,3)4/h5-6,9-10,13-14,26-27,38-40H,7-8,15H2,1-4H3,(H,35,36)/t26-/m0/s1	(S)-6-(((1-(1-(difluoromethyl)cyclopropyl)- 1H-1,2,3-triazol-4-yl)(6-fluoro-2- methylpyridin-3-yl)methyl)amino)-4- (neopentylamino)quinoline-3,8- dicarbonitrile::US11066414, Compound 473	2	aid1805683	Gilead Sciences, Inc.	124181275
1059069	InChI=1S/C28H32F2N8/c1-16-19(6-7-23(30)34-16)26(22-14-38(37-36-22)28(5)8-9-28)35-18-10-20-24(33-15-27(2,3)4)17(12-31)13-32-25(20)21(29)11-18/h6-7,10-11,13-14,26,35-37H,8-9,15H2,1-5H3,(H,32,33)/t26-/m0/s1	(S)-8-fluoro-6-(((6-fluoro-2-methylpyridin- 3-yl)(1-(1-methylcyclopropyl)-1H-1,2,3- triazol-4-yl)methyl)amino)-4-(neopentyl- amino)quinoline-3-carbonitrile::US11066414, Compound 488	3	aid1805683	Gilead Sciences, Inc.	124181274
1059067	InChI=1S/C28H31F2N9O/c1-15-18(5-6-22(30)35-15)25(21-13-39(38-37-21)28(7-8-28)26(32)40)36-17-9-19-23(34-14-27(2,3)4)16(11-31)12-33-24(19)20(29)10-17/h5-6,9-10,12-13,25,36-38H,7-8,14H2,1-4H3,(H2,32,40)(H,33,34)/t25-/m0/s1	(S)-1-(4-(((3-cyano-8-fluoro-4-(neopentyl- amino)quinolin-6-yl)amino)(6-fluoro-2- methylpyridin-3-yl)methyl)- 1H-1,2,3-triazol- 1-yl)cyclopropane-1-carboxamide::US11066414, Compound 486	3	aid1805683	Gilead Sciences, Inc.	124181273
1059058	InChI=1S/C28H31ClFN9O/c1-15-18(5-6-22(30)35-15)25(21-13-39(38-37-21)28(7-8-28)26(32)40)36-17-9-19-23(34-14-27(2,3)4)16(11-31)12-33-24(19)20(29)10-17/h5-6,9-10,12-13,25,36-38H,7-8,14H2,1-4H3,(H2,32,40)(H,33,34)/t25-/m0/s1	(S)-1-(4-(((8-chloro-3-cyano-4- (neopentylamino)quinolin-6-yl)amino)(6- fluoro-2-methylpyridin-3-yl)methyl)-1H- 1,2,3-triazol-1-yl)cyclopropane-1- carboxamide::US11066414, Compound 477	2	aid1805683	Gilead Sciences, Inc.	124181265
1059053		(S)-6-(((1H-indazol-4-yl)(1-(1-(trifluoro- methyl)cyclopropyl)-1H-1,2,3-triazol-4- yl)methyl)amino)-4-(neopentylamino)- quinoline-3,8-dicarbonitrile::US11066414, Compound 472	4	aid1805683	Gilead Sciences, Inc.	124181261
1059052	InChI=1S/C29H29F4N9/c1-16-20(5-6-23(30)38-16)26(22-14-42(41-40-22)28(7-8-28)29(31,32)33)39-19-9-17(11-34)24-21(10-19)25(18(12-35)13-36-24)37-15-27(2,3)4/h5-6,9-10,13-14,26,39-41H,7-8,15H2,1-4H3,(H,36,37)/t26-/m0/s1	(S)-6-(((6-fluoro-2- methylpyridin-3-yl)(1-(1- (trifluoromethyl)cyclopropyl)-1H-1,2,3- triazol-4-yl)methyl)amino)-4-(neopentyl- amino)quinoline-3,8-dicarbonitrile::US11066414, Compound 471	3	aid1805683	Gilead Sciences, Inc.	124181260
1059050	InChI=1S/C32H30F3N9/c1-30(2,3)18-40-28-20(15-37)16-39-27-19(14-36)12-21(13-24(27)28)41-29(23-6-4-8-25-22(23)7-5-11-38-25)26-17-44(43-42-26)31(9-10-31)32(33,34)35/h4-8,11-13,16-17,29,41-43H,9-10,18H2,1-3H3,(H,39,40)/t29-/m0/s1	(S)-4-(neopentylamino)-6- ((quinolin-5-yl(1- (1-(trifluoromethyl)- cyclopropyl)-1H-1,2,3- triazol-4-yl)methyl)amino)quinoline-3,8- dicarbonitrile::US11066414, Compound 469	4	aid1805683	Gilead Sciences, Inc.	124181259
1059049	InChI=1S/C31H31N9/c1-31(2,3)18-36-29-21(14-33)16-35-28-20(13-32)11-22(12-26(28)29)37-30(27-17-40(39-38-27)23-7-8-23)25-6-4-5-19-15-34-10-9-24(19)25/h4-6,9-12,15-17,23,30,37-39H,7-8,18H2,1-3H3,(H,35,36)/t30-/m0/s1	(S)-6-(((1-cyclopropyl-1H-1,2,3-triazol-4- yl)(isoquinolin-5-yl)methyl)amino)-4- (neopentylamino)quinoline-3,8- dicarbonitrile::US11066414, Compound 468	1	aid1805683	Gilead Sciences, Inc.	124181258
1059046	InChI=1S/C30H31N9OS/c1-29(2,3)15-34-26-19(12-32)13-33-25-18(11-31)9-20(10-22(25)26)36-27(21-5-4-6-23-28(21)41-17-35-23)24-14-39(38-37-24)30(16-40)7-8-30/h4-6,9-10,13-14,17,27,36-38,40H,7-8,15-16H2,1-3H3,(H,33,34)/t27-/m0/s1	(S)-6-((benzo[d]thiazol-7-yl(1-(1- (hydroxymethyl)cyclopropyl)-1H- 1,2,3-triazol-4-yl)methyl)amino)-4- (neopentylamino)quinoline-3,8- dicarbonitrile::US11066414, Compound 465	2	aid1805683	Gilead Sciences, Inc.	124181255
1059044	InChI=1S/C30H32ClN9OS/c1-29(2,3)15-35-24-17(12-32)13-34-25-20(24)10-18(11-21(25)31)37-26(19-6-4-7-22-27(19)42-16-36-22)23-14-40(39-38-23)30(28(33)41)8-5-9-30/h4,6-7,10-11,13-14,16,26,37-39H,5,8-9,15H2,1-3H3,(H2,33,41)(H,34,35)/t26-/m0/s1	(S)-1-(4-(benzo[d]thiazol-7-yl((8-chloro- 3-cyano-4-(neopentylamino)quinolin-6- yl)amino)methyl)-1H-1,2,3-triazol-1- yl)cyclobutane-1-carboxamide::US11066414, Compound 463	2	aid1805683	Gilead Sciences, Inc.	124181253
1059042	InChI=1S/C31H30ClF3N8/c1-29(2,3)17-39-26-18(14-36)15-38-27-22(26)12-19(13-23(27)32)40-28(21-6-4-8-24-20(21)7-5-11-37-24)25-16-43(42-41-25)30(9-10-30)31(33,34)35/h4-8,11-13,15-16,28,40-42H,9-10,17H2,1-3H3,(H,38,39)/t28-/m0/s1	(S)-8-chloro-4-(neopentylamino)-6- ((quinolin-5-yl(1-(1-(trifluoromethyl)- cyclopropyl)-1H-1,2,3-triazol-4- yl)methyl)amino)quinoline-3- carbonitrile::US11066414, Compound 461	17	aid1805683	Gilead Sciences, Inc.	124181251
1059041	InChI=1S/C28H26F3N9S/c1-27(2,3)13-35-24-17(10-33)11-34-23-16(9-32)7-18(8-20(23)24)37-25(19-5-4-6-21-26(19)41-15-36-21)22-12-40(39-38-22)14-28(29,30)31/h4-8,11-12,15,25,37-39H,13-14H2,1-3H3,(H,34,35)/t25-/m0/s1	(S)-6-((benzo[d]thiazol-7-yl(1-(2,2,2- trifluoroethyl)-1H-1,2,3-triazol-4-yl) methyl)amino)-4-(neopentylamino)- quinoline-3,8-dicarbonitrile::US11066414, Compound 460	5	aid1805683	Gilead Sciences, Inc.	124181250
1059056	InChI=1S/C32H30F3N9OS/c1-30(2)16-45-9-6-25(30)41-27-19(13-37)14-38-26-18(12-36)10-20(11-22(26)27)40-28(21-4-3-5-23-29(21)46-17-39-23)24-15-44(43-42-24)31(7-8-31)32(33,34)35/h3-5,10-11,14-15,17,25,28,40,42-43H,6-9,16H2,1-2H3,(H,38,41)/t25?,28-/m0/s1	6-(((S)-benzo[d]thiazol-7-yl(1-(1- (trifluoromethyl)cyclopropyl)-1H-1,2,3- triazol-4-yl)methyl)amino)-4-((3,3- dimethyltetrahydro-2H-pyran-4- yl)amino)quinoline-3,8-dicarbonitrile::US11066414, Compound 452::US11066414, Compound 475	20	aid1805683	Gilead Sciences, Inc.	124181240
1059022	InChI=1S/C30H30FN9S/c1-29(2,3)16-35-26-19(12-33)13-34-25-18(11-32)9-20(10-22(25)26)37-27(21-5-4-6-23-28(21)41-17-36-23)24-14-40(39-38-24)30(15-31)7-8-30/h4-6,9-10,13-14,17,27,37-39H,7-8,15-16H2,1-3H3,(H,34,35)/t27-/m0/s1	(S)-6-((benzo[d]thiazol-7-yl(1-(1- (fluoromethyl)cyclopropyl)-1H-1,2,3- triazol-4-yl)methyl)amino)-4- (neopentylamino)quinoline-3,8- dicarbonitrile::US11066414, Compound 441	2	aid1805683	Gilead Sciences, Inc.	124181235
1059028	InChI=1S/C28H30ClF3N8/c1-15-18(5-6-22(30)36-15)25(21-13-40(39-38-21)28(7-8-28)26(31)32)37-17-9-19-23(35-14-27(2,3)4)16(11-33)12-34-24(19)20(29)10-17/h5-6,9-10,12-13,25-26,37-39H,7-8,14H2,1-4H3,(H,34,35)/t25-/m0/s1	(S)-8-chloro-6-(((1-(1-(difluoromethyl)- cyclopropyl)-1H-1,2,3-triazol-4-yl)(6- fluoro-2-methylpyridin-3-yl)methyl)- amino)-4-(neopentylamino)quinoline-3- carbonitrile::US11066414, Compound 447::US11066414, Compound 501::US11066414, Compound 973	2	aid1805683	Gilead Sciences, Inc.	124181234
1059025	InChI=1S/C30H30F2N10/c1-29(2,3)17-36-26-19(14-34)15-35-25-18(13-33)11-20(12-22(25)26)38-27(21-5-4-10-41-24(21)6-9-37-41)23-16-42(40-39-23)30(7-8-30)28(31)32/h4-6,9-12,15-16,27-28,38-40H,7-8,17H2,1-3H3,(H,35,36)/t27-/m0/s1	(S)-6-(((Ml-(difluoromethyl)cyclopropyl)- 1H-1,2,3-triazol-4-yl)(pyrazolo[1,5- a]pyridin-4-yl)methyl)amino)-4- (neopentylamino)quinoline-3,8- dicarbonitrile::US11066414, Compound 444	2	aid1805683	Gilead Sciences, Inc.	124181232
1059015	InChI=1S/C29H31ClN8S/c1-28(2,3)15-33-24-17(12-31)13-32-25-20(24)10-18(11-21(25)30)35-26(19-6-5-7-22-27(19)39-16-34-22)23-14-38(37-36-23)29(4)8-9-29/h5-7,10-11,13-14,16,26,35-37H,8-9,15H2,1-4H3,(H,32,33)/t26-/m0/s1	(S)-6-((benzo[d]thiazol-7-yl(1-(1- methylcyclopropyl)-1H-1,2,3-triazol- 4-yl)methyl)am ino)-8-chloro-4- (neopentylamino)quinoline-3-carbonitrile::US11066414, Compound 434	2	aid1805683	Gilead Sciences, Inc.	124181228
1059012	InChI=1S/C32H29ClFN9/c1-19-24(11-12-29(34)38-19)32(28-18-43(42-41-28)23-9-10-23)39-22-14-25-30(21(16-36)17-37-31(25)26(33)15-22)40-27(8-5-13-35)20-6-3-2-4-7-20/h2-4,6-7,11-12,14-15,17-18,23,27,32,39,41-42H,5,8-10H2,1H3,(H,37,40)/t27-,32+/m1/s1	8-chloro-4-(((R)-3-cyano-1-phenyl- propyl)amino)-6-(((S)-(1-cyclopropyl- 1H-1,2,3-triazol-4-yl)(6-fluoro-2- methylpyridin-3-yl)methyl)amino)- quinoline-3-carbonitrile::US11066414, Compound 431	1	aid1805683	Gilead Sciences, Inc.	124181227
1059023	InChI=1S/C30H31F3N8O2S2/c1-28(2,3)15-36-24-17(12-34)13-35-26-20(24)10-18(11-23(26)45(4,42)43)38-25(19-6-5-7-21-27(19)44-16-37-21)22-14-41(40-39-22)29(8-9-29)30(31,32)33/h5-7,10-11,13-14,16,25,38-40H,8-9,15H2,1-4H3,(H,35,36)/t25-/m0/s1	(S)-6-((benzo[d]thiazol-7-yl(1-(1- (trifluoromethyl)cyclopropyl)-1H-1,2,3- triazol-4-yl)methyl)amino)-8-(methyl- sulfonyl)-4-(neopentylamino)quinoline- 3-carbonitrile::US11066414, Compound 442	56	aid1805683	Gilead Sciences, Inc.	124181224
1059016	InChI=1S/C30H31N9S/c1-29(2,3)16-34-26-19(13-32)14-33-25-18(12-31)10-20(11-22(25)26)36-27(21-6-5-7-23-28(21)40-17-35-23)24-15-39(38-37-24)30(4)8-9-30/h5-7,10-11,14-15,17,27,36-38H,8-9,16H2,1-4H3,(H,33,34)/t27-/m0/s1	(S)-6-((benzo[d]thiazol-7-yl(1-(1- methylcyclopropyl)-1H-1,2,3-triazol-4- yl)methyl)am ino)-4-(neopentylamino)- quinoline-3,8-dicarbonitrile::US11066414, Compound 435	1	aid1805683	Gilead Sciences, Inc.	124181217
1059005	InChI=1S/C30H29F2N9S/c1-29(2,3)15-36-25-18(12-34)13-35-24-17(11-33)9-19(10-21(24)25)38-26(20-5-4-6-22-27(20)42-16-37-22)23-14-41(40-39-23)30(7-8-30)28(31)32/h4-6,9-10,13-14,16,26,28,38-40H,7-8,15H2,1-3H3,(H,35,36)/t26-/m0/s1	(S)-6-((benzo[d]thiazol-7-yl(1-(1- (difluoromethyl)cyclopropyl)-1H- 1,2,3-triazol-4-yl)methyl)amino)-4- (neopentylamino)quinoline-3,8- dicarbonitrile::US11066414, Compound 424	2	aid1805683	Gilead Sciences, Inc.	124181206
1059002	InChI=1S/C29H29ClF2N8S/c1-28(2,3)14-35-23-16(11-33)12-34-24-19(23)9-17(10-20(24)30)37-25(18-5-4-6-21-26(18)41-15-36-21)22-13-40(39-38-22)29(7-8-29)27(31)32/h4-6,9-10,12-13,15,25,27,37-39H,7-8,14H2,1-3H3,(H,34,35)/t25-/m0/s1	(S)-6-((benzo[d]thiazol-7-yl(1-(1- (difluoromethyl)cyclopropyl)-1H-1,2,3- triazol-4-yl)methyl)amino)-8-chloro-4- (neopentylamino)quinoline-3- carbonitrile::US11066414, Compound 421	4	aid1805683	Gilead Sciences, Inc.	124181204
1058998	InChI=1S/C29H28ClF3N8S/c1-27(2,3)14-36-23-16(11-34)12-35-24-19(23)9-17(10-20(24)30)38-25(18-5-4-6-21-26(18)42-15-37-21)22-13-41(40-39-22)28(7-8-28)29(31,32)33/h4-6,9-10,12-13,15,25,38-40H,7-8,14H2,1-3H3,(H,35,36)/t25-/m0/s1	(S)-6-((benzo[d]thiazol-7-yl(1-(1- (trifluoromethyl)cyclopropyl)-1H- 1,2,3-triazol-4-yl)methyl)amino)-8- chloro-4-(neopentylamino)quinoline-3- carbonitrile::US11066414, Compound 417	9	aid1805683	Gilead Sciences, Inc.	124181203
1058996	InChI=1S/C29H28ClN9S/c1-28(2,3)15-34-24-17(11-31)12-33-25-20(24)9-18(10-21(25)30)36-26(19-5-4-6-22-27(19)40-16-35-22)23-13-39(38-37-23)29(14-32)7-8-29/h4-6,9-10,12-13,16,26,36-38H,7-8,15H2,1-3H3,(H,33,34)/t26-/m0/s1	(S)-6-((benzo[d]thiazol-7-yl(1-(1- cyanocyclopropyl)-1H-1,2,3-triazol-4- yl)methyl)amino)-8-chloro-4- (neopentylamino)quinoline-3- carbonitrile::US11066414, Compound 415	3	aid1805683	Gilead Sciences, Inc.	124181201
1058997	InChI=1S/C29H30ClN9OS/c1-28(2,3)14-34-23-16(11-31)12-33-24-19(23)9-17(10-20(24)30)36-25(18-5-4-6-21-26(18)41-15-35-21)22-13-39(38-37-22)29(7-8-29)27(32)40/h4-6,9-10,12-13,15,25,36-38H,7-8,14H2,1-3H3,(H2,32,40)(H,33,34)/t25-/m0/s1	(S)-1-(4-(benzo[d]thiazol- 7-yl((8-chloro-3- cyano-4-(neopentylamino)quinolin-6- yl)amino)methyl)-1H-1,2,3-triazol-1- yl)cyclopropane-1-carboxamide::US11066414, Compound 416	2	aid1805683	Gilead Sciences, Inc.	124181198
1058995	InChI=1S/C37H36N10OS/c38-11-4-7-32(23-5-2-1-3-6-23)43-36-25(16-40)17-41-35-24(15-39)13-26(14-30(35)36)42-37(33-18-47(45-44-33)27-8-9-27)31-22-49-34-19-46(12-10-29(31)34)28-20-48-21-28/h1-3,5-6,13-14,17-18,22,27-28,32,37,42,44-45H,4,7-10,12,19-21H2,(H,41,43)/t32-,37+/m1/s1	4-(((R)-3-cyano-1-phenylpropyl)amino)- 6-(((S)-(1-cyclopropyl-1H-1,2,3-triazol- 4-yl)(6-(oxetan-3-yl)-4,5,6,7-tetrahydro- thieno[2,3-c]pyridin-3-yl)methyl)amino)- quinoline-3,8-dicarbonitrile::US11066414, Compound 414	1	aid1805683	Gilead Sciences, Inc.	124181197
1058989	InChI=1S/C29H30BrN9OS/c1-28(2,3)14-34-23-16(11-31)12-33-24-19(23)9-17(10-20(24)30)36-25(18-5-4-6-21-26(18)41-15-35-21)22-13-39(38-37-22)29(7-8-29)27(32)40/h4-6,9-10,12-13,15,25,36-38H,7-8,14H2,1-3H3,(H2,32,40)(H,33,34)/t25-/m0/s1	(S)-1-(4-(benzo[d]thiazol-7-yl((8- bromo-3-cyano-4-(neopentylamino)- quinolin-6-yl)amino)methyl)-1H-1,2,3- triazol-1-yl)cyclopropane-1- carboxamide::US11066414, Compound 408	1	aid1805683	Gilead Sciences, Inc.	124181194
1058953	InChI=1S/C29H26Cl2FN9/c30-23-11-19(3-4-25(23)32)37-27-18(13-33)15-36-29-22(27)10-20(12-24(29)31)38-28(17-2-1-7-35-14-17)26-16-41(40-39-26)21-5-8-34-9-6-21/h1-4,7,10-12,14-16,21,28,34,38-40H,5-6,8-9H2,(H,36,37)	8-chloro-4-((3-chloro-4-fluoro- phenyl)amino)-6-(((1-(piperidin-4- yl)-1H-1,2,3-triazol-4-yl)(pyridin-3- yl)methyl)amino)quinoline-3- carbonitrile::US11066414, Compound 405	2	aid1805683	Gilead Sciences, Inc.	124181192
1058952	InChI=1S/C26H18Cl2FN7/c1-36-13-23(33-14-36)25(15-3-2-6-31-11-15)35-18-7-19-24(34-17-4-5-22(29)20(27)8-17)16(10-30)12-32-26(19)21(28)9-18/h2-9,11-14,25,35H,1H3,(H,32,34)	8-chloro-4-((3-chloro-4-fluoro- phenyl)amino)-6-(((1-methyl-1H- imidazol-4-yl)(pyridin-3-yl)methyl)- amino)quinoline-3-carbonitrile::US11066414, Compound 403	9	aid1805683	Gilead Sciences, Inc.	124181190
1058982	InChI=1S/C27H28Cl2FN11/c1-40-13-23(36-38-40)27(24-14-41(39-37-24)18-4-6-32-7-5-18)35-17-8-19-25(34-16-2-3-22(30)20(28)9-16)15(11-31)12-33-26(19)21(29)10-17/h2-3,8-10,12-14,18,27,32,35-39H,4-7H2,1H3,(H,33,34)	8-chloro-4-((3-chloro-4-fluoro- phenyl)amino)-6-(((1-methyl-1H- 1,2,3-triazol-4-yl)(1-(piperidin-4-yl)- 1H-1,2,3-triazol-4-yl)methyl)amino)- quinoline-3-carbonitrile::US11066414, Compound 397	46	aid1805683	Gilead Sciences, Inc.	124181181
1058979	InChI=1S/C28H25Cl2FN8S/c29-22-10-18(1-2-24(22)31)35-26-17(12-32)13-34-28-21(26)9-19(11-23(28)30)36-27(16-5-8-40-15-16)25-14-39(38-37-25)20-3-6-33-7-4-20/h1-2,5,8-11,13-15,20,27,33,36-38H,3-4,6-7H2,(H,34,35)/t27-/m0/s1	(S)-8-chloro-4-t-((3-chloro-4-fluoro- phenyl)amino)-6-(((1-(piperidin-4-yl)- 1H-1,2,3-triazol-4-yl)(thiophen-3- yl)methyl)amino)quinoline-3- carbonitrile::US11066414, Compound 393	5	aid1805683	Gilead Sciences, Inc.	124181176
1058950	InChI=1S/C30H28Cl3FN8S/c1-2-41-8-5-20(6-9-41)42-16-26(39-40-42)29(30-22(31)7-10-43-30)38-19-11-21-27(37-18-3-4-25(34)23(32)12-18)17(14-35)15-36-28(21)24(33)13-19/h3-4,7,10-13,15-16,20,29,38-40H,2,5-6,8-9H2,1H3,(H,36,37)/t29-/m1/s1	(R)-8-chloro-4-((3-chloro-4-fluoro- phenyl)amino)-6-(((3-chlorothiophen- 2-yl)(1-(1-ethylpiperidin-4-yl)-1H- 1,2,3-triazol-4-yl)methyl)amino)- quinoline-3-carbonitrile::US11066414, Compound 389	11	aid1805683	Gilead Sciences, Inc.	124181175
1058974	InChI=1S/C28H24Cl3FN8S/c29-20-5-8-41-28(20)27(24-14-40(39-38-24)18-3-6-34-7-4-18)37-17-9-19-25(36-16-1-2-23(32)21(30)10-16)15(12-33)13-35-26(19)22(31)11-17/h1-2,5,8-11,13-14,18,27,34,37-39H,3-4,6-7H2,(H,35,36)/t27-/m1/s1	(R)-8-chloro-4-((3-chloro-4-fluoro- phenyl)amino)-6-(((3-chlorothiophen-2- yl)(1-(piperidin-4-yl)-1H-1,2,3-triazol- 4-yl)methyl)amino)quinoline-3- carbonitrile::US11066414, Compound 387	18	aid1805683	Gilead Sciences, Inc.	124181174
1058975	InChI=1S/C28H25Cl2FN8S/c29-21-11-17(3-4-23(21)31)35-26-16(13-32)14-34-27-20(26)10-18(12-22(27)30)36-28(25-2-1-9-40-25)24-15-39(38-37-24)19-5-7-33-8-6-19/h1-4,9-12,14-15,19,28,33,36-38H,5-8H2,(H,34,35)/t28-/m1/s1	(R)-8-chloro-4-((3-chloro-4-fluoro- phenyl)amino)-6-(((1-(piperidin-4-yl)- 1H-1,2,3-triazol-4-yl)(thiophen-2- yl)methyl)amino)quinoline-3- carbonitrile::US11066414, Compound 388	10	aid1805683	Gilead Sciences, Inc.	124181171
1058948	InChI=1S/C30H28Cl3FN8S/c1-2-41-7-5-21(6-8-41)42-15-26(39-40-42)30(27-9-18(31)16-43-27)38-20-10-22-28(37-19-3-4-25(34)23(32)11-19)17(13-35)14-36-29(22)24(33)12-20/h3-4,9-12,14-16,21,30,38-40H,2,5-8H2,1H3,(H,36,37)/t30-/m1/s1	(R)-8-chloro-4-((3-chloro-4-fluoro- phenyl)amino)-6-(((4-chlorothiophen- 2-yl)(1-(1-ethylpiperidin-4-yl)-1H- 1,2,3-triazol-4-yl)methyl)amino)- quinoline-3-carbonitrile::US11066414, Compound 381	7	aid1805683	Gilead Sciences, Inc.	124181167
1058949	InChI=1S/C30H28Cl3FN8S/c1-2-41-9-7-20(8-10-41)42-16-25(39-40-42)30(26-5-6-27(33)43-26)38-19-11-21-28(37-18-3-4-24(34)22(31)12-18)17(14-35)15-36-29(21)23(32)13-19/h3-6,11-13,15-16,20,30,38-40H,2,7-10H2,1H3,(H,36,37)/t30-/m1/s1	(R)-8-chloro-4-((3-chloro-4-fluoro- phenyl)amino)-6-(((5-chlorothiophen-2- yl)(1-(1-ethyl piperidin-4-yl)-1H-1,2,3- triazol-4-yl)methyl)amino)quinoline-3- carbonitrile::US11066414, Compound 382	14	aid1805683	Gilead Sciences, Inc.	124181166
1058939	InChI=1S/C31H28Cl2FN9S/c1-2-42-7-5-22(6-8-42)43-16-27(40-41-43)31(28-9-18(13-35)17-44-28)39-21-10-23-29(38-20-3-4-26(34)24(32)11-20)19(14-36)15-37-30(23)25(33)12-21/h3-4,9-12,15-17,22,31,39-41H,2,5-8H2,1H3,(H,37,38)/t31-/m1/s1	(R)-8-chloro-4-((3-chloro-4- fluorophenyl)amino)-6-(((4- cyanothiophen-2-yl)(1-(1-ethylpiperidin- 4-yl)-1H-1,2,3-triazol-4-yl)methyl)- amino)quinoline-3-carbonitrile::US11066414, Compound 372	2	aid1805683	Gilead Sciences, Inc.	124181158
1058936	InChI=1S/C33H34Cl2FN9/c1-33(2,3)44-11-8-24(9-12-44)45-19-29(42-43-45)31(20-5-4-10-38-17-20)41-23-13-25-30(40-22-6-7-28(36)26(34)14-22)21(16-37)18-39-32(25)27(35)15-23/h4-7,10,13-15,17-19,24,31,41-43H,8-9,11-12H2,1-3H3,(H,39,40)/t31-/m0/s1	(S)-6-(((1-(1-(tert-butyl)piperidin- 4-yl)-1H-1,2,3-triazol-4-yl)(pyridin- 3-yl)methyl)amino)-8-chloro-4-((3- chloro-4-fluorophenyl)amino)quin- oline-3-carbonitrile::US11066414, Compound 369	3	aid1805683	Gilead Sciences, Inc.	124181156
1058934	InChI=1S/C30H29Cl2FN10/c1-2-42-10-6-21(7-11-42)43-17-26(40-41-43)29(30-35-8-3-9-36-30)39-20-12-22-27(38-19-4-5-25(33)23(31)13-19)18(15-34)16-37-28(22)24(32)14-20/h3-5,8-9,12-14,16-17,21,29,39-41H,2,6-7,10-11H2,1H3,(H,37,38)	8-chloro-4-((3-chloro-4- fluorophenyl)amino)-6-(((1-(1- ethylpiperidin-4-yl)-1H-1,2,3-triazol- 4-yl)(pyrim idin-2-yl)methyl)- amino)quinoline-3-carbonitrile::US11066414, Compound 367	13	aid1805683	Gilead Sciences, Inc.	124181155
1058929	InChI=1S/C26H23Cl2FN8S/c1-26(2,3)37-11-21(35-36-37)25(22-12-38-13-32-22)34-16-6-17-23(33-15-4-5-20(29)18(27)7-15)14(9-30)10-31-24(17)19(28)8-16/h4-8,10-13,25,34-36H,1-3H3,(H,31,33)/t25-/m1/s1	(S)-6-(((1-(tert-butyl)-1H-1,2,3- triazol-4-yl)(thiazol-4-yl)methyl)- amino)-8-chloro-4-((3-chloro-4- fluorophenyl)amino)quinoline-3- carbonitrile::US11066414, Compound 361	13	aid1805683	Gilead Sciences, Inc.	124181148
1058925	InChI=1S/C25H21Cl2FN8S/c1-13(2)36-10-21(34-35-36)25(22-11-37-12-31-22)33-16-5-17-23(32-15-3-4-20(28)18(26)6-15)14(8-29)9-30-24(17)19(27)7-16/h3-7,9-13,25,33-35H,1-2H3,(H,30,32)/t25-/m1/s1	(S)-8-chloro-4-((3-chloro-4- fluorophenyl)amino)-6-(((1-isopropyl- 1H-1,2,3-triazol-4-yl)(thiazol-4- yl)methyl)amino)quinoline-3- carbonitrile::US11066414, Compound 357	5	aid1805683	Gilead Sciences, Inc.	124181146
1058923	InChI=1S/C27H24Cl2FN9S/c28-20-8-16(1-2-22(20)30)35-25-15(10-31)11-33-26-19(25)7-17(9-21(26)29)36-27(24-13-40-14-34-24)23-12-39(38-37-23)18-3-5-32-6-4-18/h1-2,7-9,11-14,18,27,32,36-38H,3-6H2,(H,33,35)/t27-/m1/s1	(S)-8-chloro-4-((3-chloro-4- fluorophenyl)amino)-6-(((1- (piperidin-4-yl)-1H-1,2,3-triazol-4- yl)(thiazol-4-yl)methyl)amino)- quinoline-3-carbonitrile::US11066414, Compound 354	3	aid1805683	Gilead Sciences, Inc.	124181142
1058920	InChI=1S/C36H35Cl2FN8S/c1-36(2,3)46-12-10-24(11-13-46)47-19-31(44-45-47)35(27-20-48-32-7-5-4-6-25(27)32)43-23-14-26-33(42-22-8-9-30(39)28(37)15-22)21(17-40)18-41-34(26)29(38)16-23/h4-9,14-16,18-20,24,35,43-45H,10-13H2,1-3H3,(H,41,42)/t35-/m0/s1	(S)-6-((benzo[b]thiophen-3-yl(1-(1- (tert-butyl)piperidin-4-yl)-1H-1,2,3- triazol-4-yl)methyl)amino)-8-chloro-4- ((3-chloro-4-fluorophenyl)amino)- quinoline-3-carbonitrile::US11066414, Compound 351	10	aid1805683	Gilead Sciences, Inc.	124181139
1058911	InChI=1S/C28H25Cl2FN8O2/c29-22-11-19(3-4-24(22)31)35-26-18(13-32)15-34-28-21(26)10-20(12-23(28)30)36-27(17-2-1-5-33-14-17)25-16-39(38-37-25)6-8-41-9-7-40/h1-5,10-12,14-16,27,36-38,40H,6-9H2,(H,34,35)/t27-/m0/s1	(S)-8-chloro-4-((3-chloro-4- fluorophenyl)amino)-6-(((1-(2-(2- hydroxyethoxy)ethyl)-1H-1,2,3- triazol-4-yl)(pyridin-3-yl)methyl)- amino)quinoline-3-carbonitrile::US11066414, Compound 341	6	aid1805683	Gilead Sciences, Inc.	124181132
1058907	InChI=1S/C31H30Cl2FN9/c32-25-14-22(6-7-27(25)34)38-29-21(16-35)18-37-31-24(29)13-23(15-26(31)33)39-30(20-5-4-8-36-17-20)28-19-43(41-40-28)12-11-42-9-2-1-3-10-42/h4-8,13-15,17-19,30,39-41H,1-3,9-12H2,(H,37,38)/t30-/m0/s1	(S)-8-chloro-4-((3-chloro-4- fluorophenyl)amino)-6-(((1-(2- (piperidin-1-yl)ethyl)-1H-1,2,3- triazol-4-yl)(pyridin-3-yl)methyl)- amino)quinoline-3-carbonitrile::US11066414, Compound 334	4	aid1805683	Gilead Sciences, Inc.	124181127
1058906	InChI=1S/C26H20Cl3FN8O/c27-19-9-15(3-4-21(19)30)34-23-14(11-31)12-33-24-18(23)8-16(10-20(24)28)35-25(17-2-1-5-32-26(17)29)22-13-38(6-7-39)37-36-22/h1-5,8-10,12-13,25,35-37,39H,6-7H2,(H,33,34)/t25-/m0/s1	(S)-8-chloro-4-((3-chloro-4- fluorophenyl)amino)-6-(((2- chloropyridin-3-yl)(1-(2-hydroxy- ethyl)-1H-1,2,3-triazol-4- yl)methyl)amino)quinoline-3- carbonitrile::US11066414, Compound 331	3	aid1805683	Gilead Sciences, Inc.	124181125
1058902	InChI=1S/C27H19Cl4FN8O/c28-19-6-24(31)34-9-18(19)27(23-10-40(39-38-23)16-11-41-12-16)37-15-3-17-25(36-14-1-2-22(32)20(29)4-14)13(7-33)8-35-26(17)21(30)5-15/h1-6,8-10,16,27,37-39H,11-12H2,(H,35,36)/t27-/m0/s1	(S)-8-chloro-4-((3-chloro-4- fluorophenyl)amino)-6-(((4,6-dichloro- pyridin-3-yl)(1-(oxetan-3-yl)-1H- 1,2,3-triazol-4-yl)methyl)amino)- quinoline-3-carbonitrile::US11066414, Compound 323	86	aid1805683	Gilead Sciences, Inc.	124181114
1058887	InChI=1S/C26H23Cl2FN8S/c1-13(2)37-11-22(35-36-37)25(26-14(3)32-12-38-26)34-17-6-18-23(33-16-4-5-21(29)19(27)7-16)15(9-30)10-31-24(18)20(28)8-17/h4-8,10-13,25,34-36H,1-3H3,(H,31,33)/t25-/m1/s1	(R)-8-chloro-4-((3-chloro-4- fluorophenyl)amino)-6-(((1-isopropyl- 1H-1,2,3-triazol-4-yl)(4-methylthiazol- 5-yl)methyl)amino)quinoline-3- carbonitrile::US11066414, Compound 306	6	aid1805683	Gilead Sciences, Inc.	124181113
1058901	InChI=1S/C27H19Cl4FN8O/c28-19-6-14(1-3-21(19)32)35-24-13(8-33)9-34-25-18(24)5-15(7-20(25)29)36-26(17-2-4-23(30)37-27(17)31)22-10-40(39-38-22)16-11-41-12-16/h1-7,9-10,16,26,36,38-39H,11-12H2,(H,34,35)/t26-/m0/s1	(S)-8-chloro-4-((3-chloro-4- fluorophenyl)amino)-6-(((2,6-dichloro- pyridin-3-yl)(1-(oxetan-3-yl)-1H-1,2,3- triazol-4-yl)methyl)amino)quinoline-3- carbonitrile::US11066414, Compound 322	33	aid1805683	Gilead Sciences, Inc.	124181106
1058900	InChI=1S/C28H22Cl3FN8O/c1-14-19(3-5-25(31)35-14)28(24-11-40(39-38-24)18-12-41-13-18)37-17-6-20-26(36-16-2-4-23(32)21(29)7-16)15(9-33)10-34-27(20)22(30)8-17/h2-8,10-11,18,28,37-39H,12-13H2,1H3,(H,34,36)/t28-/m0/s1	(S)-8-chloro-6-(((6-chloro-2-methyl- pyridin-3-yl)(1-(oxetan-3-yl)-1H-1,2,3- triazol-4-yl)methyl)amino)-4-((3-chloro- 4-fluorophenyl)amino)quinoline-3- carbonitrile::US11066414, Compound 321	10	aid1805683	Gilead Sciences, Inc.	124181103
1058897	InChI=1S/C30H20Cl2FN9S/c31-23-9-19(4-5-25(23)33)38-28-18(12-35)13-37-29-22(28)8-21(10-24(29)32)39-30(27-7-17(11-34)16-43-27)26-15-42(41-40-26)14-20-3-1-2-6-36-20/h1-10,13,15-16,30,39-41H,14H2,(H,37,38)/t30-/m1/s1	(R)-8-chloro-4-((3-chloro-4- fluorophenyl)amino)-6-(((4-cyano- thiophen-2-yl)(1-(pyridin-2-ylmethyl)- 1H-1,2,3-triazol-4-yl)methyl)- amino)quinoline-3-carbonitrile::US11066414, Compound 317	16	aid1805683	Gilead Sciences, Inc.	124181102
1058958	InChI=1S/C27H19BrCl3FN8O/c28-14-3-19(27(31)35-9-14)26(23-10-40(39-38-23)17-11-41-12-17)37-16-4-18-24(36-15-1-2-22(32)20(29)5-15)13(7-33)8-34-25(18)21(30)6-16/h1-6,8-10,17,26,37-39H,11-12H2,(H,34,36)/t26-/m0/s1	(S)-6-(((5-bromo-2-chloropyridin-3- yl)(1-(oxetan-3-yl)-1H-1,2,3-triazol-4- yl)methyl)amino)-8-chloro-4-((3- chloro-4-fluorophenyl)amino)quinoline- 3-carbonitrile::US11066414, Compound 320	60	aid1805683	Gilead Sciences, Inc.	124181096
1058889	InChI=1S/C24H17Cl2FN8/c25-18-7-15(3-4-20(18)27)32-22-14(9-28)11-30-24-17(22)6-16(8-19(24)26)33-23(21-12-31-35-34-21)13-2-1-5-29-10-13/h1-8,10-12,23,31,33-35H,(H,30,32)/t23-/m0/s1	(S)-8-chloro-4-((3-chloro-4- fluorophenyl)amino)-6-((pyridin-3-yl(1H- 1,2,3-triazol-4-yl)methyl)amino)- quinoline-3-carbonitrile::US11066414, Compound 308	4	aid1805683	Gilead Sciences, Inc.	124181088
1058879	InChI=1S/C25H21Cl2FN8O/c1-13(2)36-11-21(34-35-36)25(22-10-30-12-37-22)33-16-5-17-23(32-15-3-4-20(28)18(26)6-15)14(8-29)9-31-24(17)19(27)7-16/h3-7,9-13,25,33-35H,1-2H3,(H,31,32)/t25-/m1/s1	(R)-8-chloro-4-((3-chloro-4-fluoro- phenyl)amino)-6-(((1-isopropyl-1H- 1,2,3-triazol-4- yl)(oxazol-5-yl)methyl)- amino)quinoline-3-carbonitrile::US11066414, Compound 298	39	aid1805683	Gilead Sciences, Inc.	124181080
1058874	InChI=1S/C33H32Cl2F3N9/c1-33(2,3)46-8-6-22(7-9-46)47-17-28(44-45-47)30(18-10-27(37)32(38)41-15-18)43-21-11-23-29(42-20-4-5-26(36)24(34)12-20)19(14-39)16-40-31(23)25(35)13-21/h4-5,10-13,15-17,22,30,43-45H,6-9H2,1-3H3,(H,40,42)/t30-/m0/s1	(S)-6-(((1-(1-(tert-butyl)piperidin-4-yl)- 1H-1,2,3-triazol-4- yl)(5,6-difluoropyridin- 3-yl)methyl)amino)-8- chloro-4-((3-chloro- 4-fluorophenyl)amino)quinoline-3- carbonitrile::US11066414, Compound 292	17	aid1805683	Gilead Sciences, Inc.	124181079
1058873	InChI=1S/C36H40Cl2FN9O/c1-21(2)49-35-26(7-6-12-41-35)34(31-20-48(46-45-31)25-10-13-47(14-11-25)36(3,4)5)44-24-15-27-32(43-23-8-9-30(39)28(37)16-23)22(18-40)19-42-33(27)29(38)17-24/h6-9,12,15-17,19-21,25,34,44-46H,10-11,13-14H2,1-5H3,(H,42,43)/t34-/m0/s1	(S)-6-(((1-(1-(tert-butyl)piperidin-4- yl)-1H-1,2,3-triazol-4-yl)(2-isopro- poxypyridin-3-yl)methyl)amino)-8- chloro-4-((3-chloro-4-fluorophenyl)- amino)quinoline-3-carbonitrile::US11066414, Compound 291	35	aid1805683	Gilead Sciences, Inc.	124181076
1058871	InChI=1S/C34H35Cl3FN9/c1-19-11-30(37)40-17-25(19)33(29-18-47(45-44-29)23-7-9-46(10-8-23)34(2,3)4)43-22-12-24-31(42-21-5-6-28(38)26(35)13-21)20(15-39)16-41-32(24)27(36)14-22/h5-6,11-14,16-18,23,33,43-45H,7-10H2,1-4H3,(H,41,42)/t33-/m0/s1	(S)-6-(((Hl-(tert-butyl)piperidin-4-yl)- 1H-1,2,3-triazol-4-yl)(6-chloro-4- methylpyridin-3-yl)methyl)amino)- 8-chloro-4-((3-chloro-4-fluorophenyl)- amino)quinoline-3-carbonitrile::US11066414, Compound 289	37	aid1805683	Gilead Sciences, Inc.	124181073
1058870	InChI=1S/C34H44ClN9/c1-34(2,3)43-15-12-27(13-16-43)44-22-30(41-42-44)32(23-9-8-14-37-20-23)40-26-17-28-31(39-25-10-6-4-5-7-11-25)24(19-36)21-38-33(28)29(35)18-26/h8-9,14,17-18,20-22,25,27,32,40-42H,4-7,10-13,15-16H2,1-3H3,(H,38,39)/t32-/m0/s1	(S)-6-(((1-(1-(tert-butyl)piperidin-4- yl)-1H-1,2,3-triazol-4-yl)(pyridin- 3-yl)methyl)amino)-8-chloro-4- (cycloheptylamino)quinoline-3- carbonitrile::US11066414, Compound 288	26	aid1805683	Gilead Sciences, Inc.	124181072
1058869	InChI=1S/C33H40ClN9/c1-33(2,3)42-14-11-26(12-15-42)43-21-29(40-41-43)31(22-8-7-13-36-19-22)39-25-16-27-30(38-24-9-5-4-6-10-24)23(18-35)20-37-32(27)28(34)17-25/h7-8,13,16-17,19-21,24,26,31,39H,4-6,9-12,14-15H2,1-3H3,(H,37,38)/t31-/m0/s1	(S)-6-(((1-(1-(tert-butyl)piperidin-4- yl)-1H-1,2,3-triazol-4-yl)(pyridin- 3-yl)methyl)amino)-8-chloro-4- (cyclohexylamino)quinoline-3- carbonitrile::US11066414, Compound 287	20	aid1805683	Gilead Sciences, Inc.	124181071
1058868	InChI=1S/C33H34Cl2FN9/c1-33(2,3)44-12-9-23(10-13-44)45-19-28(42-43-45)31(20-6-5-11-38-17-20)40-22-14-24-30(41-27-8-4-7-25(34)29(27)36)21(16-37)18-39-32(24)26(35)15-22/h4-8,11,14-15,17-19,23,31,40,42-43H,9-10,12-13H2,1-3H3,(H,39,41)/t31-/m0/s1	(S)-6-(((Ml-(tert-butyl)piperidin-4- yl)-1H-1,2,3-triazol-4-yl)(pyridin- 3-yl)methyl)amino)-8-chloro-4-((3- chloro-2-fluorophenyl)- amino)quinoline- 3-carbonitrile::US11066414, Compound 286	4	aid1805683	Gilead Sciences, Inc.	124181070
1058867	InChI=1S/C33H34ClF2N9/c1-33(2,3)44-11-8-24(9-12-44)45-19-29(42-43-45)31(20-5-4-10-38-17-20)41-23-13-25-30(40-22-6-7-27(35)28(36)15-22)21(16-37)18-39-32(25)26(34)14-23/h4-7,10,13-15,17-19,24,31,41-43H,8-9,11-12H2,1-3H3,(H,39,40)/t31-/m0/s1	(S)-6-(((1-(1-(tert-butyl)piperidin-4- yl)-1H-1,2,3-triazol-4-yl)(p yridin-3- yl)methyl)amino)-8-chloro-4-((3,4- difluorophenyl)amino)quinoline-3- carbonitrile::US11066414, Compound 285	8	aid1805683	Gilead Sciences, Inc.	124181068
1058865	InChI=1S/C34H36Cl2FN9/c1-20-25(6-5-11-39-20)33(30-19-46(44-43-30)24-9-12-45(13-10-24)34(2,3)4)42-23-14-26-31(41-22-7-8-29(37)27(35)15-22)21(17-38)18-40-32(26)28(36)16-23/h5-8,11,14-16,18-19,24,33,42-44H,9-10,12-13H2,1-4H3,(H,40,41)/t33-/m0/s1	(S)-6-(((1-0-(tert-butyl)piperidin-4- yl)-1H-1,2,3-triazol-4-yl)(2-methyl- pyridin-3-yl)methyl)amino)-8- chloro-4-((3-chloro-4-fluorophenyl)- amino)quinoline-3-carbonitrile::US11066414, Compound 283	3	aid1805683	Gilead Sciences, Inc.	124181067
1058863	InChI=1S/C34H36Cl2FN9/c1-20-5-6-21(17-39-20)32(30-19-46(44-43-30)25-9-11-45(12-10-25)34(2,3)4)42-24-13-26-31(41-23-7-8-29(37)27(35)14-23)22(16-38)18-40-33(26)28(36)15-24/h5-8,13-15,17-19,25,32,42-44H,9-12H2,1-4H3,(H,40,41)/t32-/m0/s1	(S)-6-(((1-(1-(tert-butyl)piperidin- 4-yl)-1H-1,2,3-triazol-4-yl)(6- methylpyridin-3-yl)methyl)amino)- 8-chloro-4-((3-chloro-4-fluorophenyl)- amino)quinoline-3-carbonitrile::US11066414, Compound 281	13	aid1805683	Gilead Sciences, Inc.	124181066
1058858	InChI=1S/C22H15Cl2FN8S/c23-15-4-12(1-2-17(15)25)30-20-11(6-26)7-27-21-14(20)3-13(5-16(21)24)31-22(18-8-29-33-32-18)19-9-34-10-28-19/h1-5,7-10,22,29,31-33H,(H,27,30)/t22-/m1/s1	(S)-8-chloro-4-((3-chloro-4- fluorophenyl)amino)-6-((thiazol- 4-yl(1H-1,2,3-triazol-4- yl)methyl)amino)quinoline-3- carbonitrile::US11066414, Compound 276	6	aid1805683	Gilead Sciences, Inc.	124181062
1058859	InChI=1S/C22H15Cl2FN8S/c23-15-4-12(1-2-17(15)25)30-20-11(6-26)7-28-21-14(20)3-13(5-16(21)24)31-22(18-8-29-33-32-18)19-9-27-10-34-19/h1-5,7-10,22,29,31-33H,(H,28,30)/t22-/m1/s1	(R)-B-chloro-4-((3-chloro-4- fluorophenyl)amino)-6- ((thiazol-5-yl(1H-1,2,3-triazol-4- yl)methyl)amino)quinoline-3- carbonitrile::US11066414, Compound 277	7	aid1805683	Gilead Sciences, Inc.	124181061
1058855	InChI=1S/C31H29Cl2FN8O2/c1-17-5-6-18(13-36-17)28(26-15-42(41-40-26)16-44-30(43)31(2,3)4)39-21-9-22-27(38-20-7-8-25(34)23(32)10-20)19(12-35)14-37-29(22)24(33)11-21/h5-11,13-15,28,39-41H,16H2,1-4H3,(H,37,38)/t28-/m0/s1	(S)-(4-(((8-chloro-4-((3-chloro-4- fluorophenyl)amino)-3-cyanoquinolin- 6-yl)amino)(6-methylpyridin-3- yl)methyl)-1H-1,2,3-triazol-1- yl)methyl pivalate::US11066414, Compound 273	51	aid1805683	Gilead Sciences, Inc.	124181057
1058852	InChI=1S/C28H25Cl2FN8S/c1-2-39-6-5-18-20(14-40-25(18)13-39)28(24-12-34-38-37-24)36-17-7-19-26(35-16-3-4-23(31)21(29)8-16)15(10-32)11-33-27(19)22(30)9-17/h3-4,7-9,11-12,14,28,34,36-38H,2,5-6,13H2,1H3,(H,33,35)/t28-/m0/s1	(S)-8-chloro-4-((3-chloro-4-fluoro- phenyl)amino)-6-(((6-ethyl-4,5,6,7- tetrahydrothieno[2,3-c]pyridin-3- yl)(1H-1,2,3-triazol-4-yl)methyl)- amino)quinoline-3-carbonitrile::US11066414, Compound 270	4	aid1805683	Gilead Sciences, Inc.	124181054
1058850	InChI=1S/C32H35Cl2FN10/c1-32(2,3)44-11-7-22(8-12-44)45-18-28(40-42-45)31(27-9-10-43(4)41-27)39-21-13-23-29(38-20-5-6-26(35)24(33)14-20)19(16-36)17-37-30(23)25(34)15-21/h5-6,9-10,13-15,17-18,22,31,39-40,42H,7-8,11-12H2,1-4H3,(H,37,38)/t31-/m0/s1	(R)-6-(((1-(1-(tert-butyl)piperidin-4- yl)-1H-1,2,3-triazol-4-yl)(1-methyl- 1H-pyrazol-3-yl)methyl)amino)-8- chloro-4-((3-chloro-4-fluorophenyl)- amino)quinoline-3-carbonitrile::US11066414, Compound 268	12	aid1805683	Gilead Sciences, Inc.	124181053
1058856	InChI=1S/C31H29Cl2FN8O2/c1-17-21(6-5-9-36-17)29(26-15-42(41-40-26)16-44-30(43)31(2,3)4)39-20-10-22-27(38-19-7-8-25(34)23(32)11-19)18(13-35)14-37-28(22)24(33)12-20/h5-12,14-15,29,39-41H,16H2,1-4H3,(H,37,38)/t29-/m0/s1	(S)-(4-(((8-chloro-4-((3-chloro-4- fluorophenyl)amino)-3-cyanoquinolin- 6-yl)amino)(2-methylpyridin-3- yl)methyl)-1H-1,2,3-triazol-1- yl)methyl pivalate::US11066414, Compound 274	12	aid1805683	Gilead Sciences, Inc.	124181052
1058848	InChI=1S/C23H18Cl2FN9/c1-35-10-20(29-11-35)23(19-9-30-34-33-19)32-14-4-15-21(31-13-2-3-18(26)16(24)5-13)12(7-27)8-28-22(15)17(25)6-14/h2-6,8-11,23,30,32-34H,1H3,(H,28,31)/t23-/m1/s1	(S)-8-chloro-4-((3-chloro-4- fluorophenyl)amino)-6-(((1- methyl-1H-imidazol-4-yl)(1H- 1,2,3-triazol-4-yl)methyl)amino)- quinoline-3-carbonitrile::US11066414, Compound 266	37	aid1805683	Gilead Sciences, Inc.	124181051
1058845	InChI=1S/C32H34Cl2FN9O/c1-18-28(38-17-45-18)31(27-16-44(42-41-27)22-7-9-43(10-8-22)32(2,3)4)40-21-11-23-29(39-20-5-6-26(35)24(33)12-20)19(14-36)15-37-30(23)25(34)13-21/h5-6,11-13,15-17,22,31,40-42H,7-10H2,1-4H3,(H,37,39)/t31-/m1/s1	(S)-6-(((1-(1-(tert-butyl)piperidin-4-yl)- 1H-1,2,3-triazol-4-yl)(5-methyloxazol-4- yl)methyl)amino)-8-chloro-4-((3-chloro- 4-fluorophenyl)amino)quinoline-3- carbonitrile::US11066414, Compound 263	13	aid1805683	Gilead Sciences, Inc.	124181045
1058836	InChI=1S/C27H25ClN8/c1-2-23(17-7-4-3-5-8-17)34-25-19(13-29)15-31-27-21(25)11-20(12-22(27)28)33-26(24-16-32-36-35-24)18-9-6-10-30-14-18/h3-12,14-16,23,26,32-33,35-36H,2H2,1H3,(H,31,34)/t23-,26+/m1/s1	8-chloro-4-(((R)-1- phenylpropyl)amino)- 6-(((S)-pyridin-3-yl(1H-1,2,3-triazol- 4-yl)methyl)amino)quinoline-3- carbonitrile::US11066414, Compound 254	3	aid1805683	Gilead Sciences, Inc.	124181044
1058847	InChI=1S/C32H34Cl2FN9O/c1-18-31(45-17-38-18)30(27-16-44(42-41-27)22-7-9-43(10-8-22)32(2,3)4)40-21-11-23-28(39-20-5-6-26(35)24(33)12-20)19(14-36)15-37-29(23)25(34)13-21/h5-6,11-13,15-17,22,30,40-42H,7-10H2,1-4H3,(H,37,39)/t30-/m1/s1	(R)-6-(((1-(1-(tert-butyl)piperidin-4-yl)- 1H-1,2,3-triazol-4-yl)(4-methyloxazol-5- yl)methyl)amino)-8-chloro-4-((3- chloro-4-fluorophenyl)amino)quinoline- 3-carbonitrile::US11066414, Compound 265	14	aid1805683	Gilead Sciences, Inc.	124181041
1058840	InChI=1S/C36H42ClN9/c1-5-31(24-10-7-6-8-11-24)42-33-26(20-38)22-40-35-29(33)18-27(19-30(35)37)41-34(25-12-9-15-39-21-25)32-23-46(44-43-32)28-13-16-45(17-14-28)36(2,3)4/h6-12,15,18-19,21-23,28,31,34,41,43-44H,5,13-14,16-17H2,1-4H3,(H,40,42)/t31-,34+/m1/s1	6-(((SMM1-(tert-butyl)piperidin-4-yl)- 1H-1,2,3-triazol-4-yl)(pyridin-3- yl)methyl)amino)-8-chloro-4-(((R)-1- phenyl propyl)amino)quinoline-3- carbonitrile::US11066414, Compound 258	2	aid1805683	Gilead Sciences, Inc.	124181039
1058833	InChI=1S/C23H17Cl2FN8S/c1-11-23(35-10-29-11)22(18-9-30-34-33-18)31-13-5-14-20(32-17-4-2-3-15(24)19(17)26)12(7-27)8-28-21(14)16(25)6-13/h2-6,8-10,22,30-31,33-34H,1H3,(H,28,32)/t22-/m1/s1	(R)-8-chloro-4-((3-chloro-2- fluorophenyl)amino)-6-(((4- methylthiazol-5-yl)(1H-1,2,3- triazol-4- yl)methyl)amino)quinoline-3- carbonitrile::US11066414, Compound 251	5	aid1805683	Gilead Sciences, Inc.	124181038
1058842	InChI=1S/C33H33Cl3FN9/c1-33(2,3)45-11-8-22(9-12-45)46-18-27(43-44-46)31(19-5-4-10-39-16-19)41-21-13-23-30(20(15-38)17-40-32(23)25(35)14-21)42-26-7-6-24(34)28(36)29(26)37/h4-7,10,13-14,16-18,22,31,41,43-44H,8-9,11-12H2,1-3H3,(H,40,42)/t31-/m0/s1	(S)-6-(((1-(1-(tert-butyl)piperidin-4- yl)-1H-1,2,3-triazol-4-yl )(pyridin-3- yl)methyl)amino)-8-chloro-4-((3,4- dichloro-2-fluorophenyl)amino)- quinoline-3-carbonitrile::US11066414, Compound 260	6	aid1805683	Gilead Sciences, Inc.	124181036
1058839	InChI=1S/C24H17Cl2FN8/c25-17-4-1-5-19(21(17)27)33-22-14(9-28)11-30-24-16(22)7-15(8-18(24)26)32-23(20-12-31-35-34-20)13-3-2-6-29-10-13/h1-8,10-12,23,31-32,34-35H,(H,30,33)/t23-/m0/s1	(S)-8-chloro-4-((3-chloro-2 -fluorophenyl)amino)-6-((pyridin-3- yl(1H-1,2,3-triazol-4-yl)methyl)- amino)quinoline-3-carbonitrile::US11066414, Compound 257	6	aid1805683	Gilead Sciences, Inc.	124181034
1058837	InChI=1S/C26H23ClN8/c1-16(17-6-3-2-4-7-17)32-24-19(12-28)14-30-26-21(24)10-20(11-22(26)27)33-25(23-15-31-35-34-23)18-8-5-9-29-13-18/h2-11,13-16,25,31,33-35H,1H3,(H,30,32)/t16-,25+/m1/s1	8-chloro-4-(((R)-1- phenylethyl)amino)-6- (((S)-pyridin-3-yl(1H-1,2,3-triazol-4- yl)methyl)amino)quinoline- 3-carbonitrile::US11066414, Compound 255	10	aid1805683	Gilead Sciences, Inc.	124181033
1058834	InChI=1S/C26H23Cl2FN8S/c1-13(2)37-11-21(35-36-37)25(26-14(3)32-12-38-26)33-16-7-17-23(34-20-6-4-5-18(27)22(20)29)15(9-30)10-31-24(17)19(28)8-16/h4-8,10-13,25,33,35-36H,1-3H3,(H,31,34)/t25-/m1/s1	(R)-8-chloro-4-((3-chloro-2- fluorophenyl)amino)-6-(((1- isopropyl-1H-1,2,3-triazol-4-yl)(4- methyl thiazol-5-yl)methyl)- amino)quinoline-3-carbonitrile::US11066414, Compound 252	6	aid1805683	Gilead Sciences, Inc.	124181032
1058830	InChI=1S/C25H19Cl2FN8/c1-13-16(4-3-7-30-13)25(21-12-32-36-35-21)33-15-8-17-23(34-20-6-2-5-18(26)22(20)28)14(10-29)11-31-24(17)19(27)9-15/h2-9,11-12,25,32-33,35-36H,1H3,(H,31,34)/t25-/m0/s1	(S)-8-chloro-4-((3-chloro-2- fluorophenyl)amino)-6-(((2- methylpyridin-3-yl)(1H-1,2,3- triazol-4-yl)methyl)amino)- quinoline-3-carbonitrile::US11066414, Compound 248	4	aid1805683	Gilead Sciences, Inc.	124181028
1058825	InChI=1S/C25H23ClN8S/c1-14(16-6-4-3-5-7-16)31-22-17(10-27)11-28-23-19(22)8-18(9-20(23)26)32-24(21-12-30-34-33-21)25-15(2)29-13-35-25/h3-9,11-14,24,30,32-34H,1-2H3,(H,28,31)/t14-,24-/m1/s1	8-chloro-6-(((R)-(4-methylthiazol- 5-yl)(1H-1,2,3-triazol-4- yl)methyl)amino)-4-(((R)-1- phenylethyl)amino)quinoline-3- carbonitrile::US11066414, Compound 243	41	aid1805683	Gilead Sciences, Inc.	124181021
1058817	InChI=1S/C26H22Cl3FN8S/c1-12(2)38-10-20(36-37-38)25(26-13(3)33-11-39-26)34-15-6-16-23(14(8-31)9-32-24(16)18(28)7-15)35-19-5-4-17(27)21(29)22(19)30/h4-7,9-12,25,34,36-37H,1-3H3,(H,32,35)/t25-/m1/s1	(R)-8-chloro-4-((3,4-dichloro-2- fluorophenyl)amino)-6-(((1-isopropyl- 1H-1,2,3-triazol-4-yl)(4-methylthiazol- 5-yl)methyl)amino)quinoline-3- carbonitrile::US11066414, Compound 235	17	aid1805683	Gilead Sciences, Inc.	124181016
1058818	InChI=1S/C32H33Cl3FN9S/c1-17-31(46-16-39-17)30(25-15-45(43-42-25)20-7-9-44(10-8-20)32(2,3)4)40-19-11-21-28(18(13-37)14-38-29(21)23(34)12-19)41-24-6-5-22(33)26(35)27(24)36/h5-6,11-12,14-16,20,30,40,42-43H,7-10H2,1-4H3,(H,38,41)/t30-/m1/s1	(R)-6-(((1-(1-(tert-butyl)piperidin-4-yl)- 1H-1,2,3-triazol-4-yl)(4-methylthiazol- 5-yl)methyl)amino)-8-chloro-4-((3,4- dichloro-2- fluorophenyl)amino)quinoline-3- carbonitrile::US11066414, Compound 236	9	aid1805683	Gilead Sciences, Inc.	124181015
1058815	InChI=1S/C34H35Cl3FN9/c1-19-23(6-5-11-40-19)33(28-18-47(45-44-28)22-9-12-46(13-10-22)34(2,3)4)42-21-14-24-31(20(16-39)17-41-32(24)26(36)15-21)43-27-8-7-25(35)29(37)30(27)38/h5-8,11,14-15,17-18,22,33,42,44-45H,9-10,12-13H2,1-4H3,(H,41,43)/t33-/m0/s1	(S)-6-(((1-(1-(tert-butyl)piperidin-4-yl)- 1H-1,2,3-triazol-4-yl)(2-methylpyridin- 3-yl)methyl)amino)-8-chloro-4- ((3,4-dichloro-2- fluorophenyl)amino)quinoline-3- carbonitrile::US11066414, Compound 233	8	aid1805683	Gilead Sciences, Inc.	124181013
1058813	InChI=1S/C36H42ClN9/c1-23(25-10-7-6-8-11-25)41-33-26(20-38)21-40-34-30(33)18-27(19-31(34)37)42-35(29-12-9-15-39-24(29)2)32-22-46(44-43-32)28-13-16-45(17-14-28)36(3,4)5/h6-12,15,18-19,21-23,28,35,42-44H,13-14,16-17H2,1-5H3,(H,40,41)/t23-,35+/m1/s1	6-(((S)-(1-(Mtert-butyl)piperidin-4- yl)-1H-1,2,3-triazol-4-yl)(2-methyl pyridin-3-yl)methyl)amino)-8- chloro- 4-(((R)-1-phenylethyl)- amino)quinoline- 3-carbonitrile::US11066414, Compound 231	8	aid1805683	Gilead Sciences, Inc.	124181011
1058811	InChI=1S/C27H25ClN8/c1-16(18-7-4-3-5-8-18)33-25-19(13-29)14-31-26-22(25)11-20(12-23(26)28)34-27(24-15-32-36-35-24)21-9-6-10-30-17(21)2/h3-12,14-16,27,32,34-36H,1-2H3,(H,31,33)/t16-,27+/m1/s1	8-chloro-6-(((S)-(2-methylpyridin- 3-yl)(1H-1,2,3-triazol-4- yl)methyl)amino)-4-(((R)-1- phenylethyl)amino)quinoline-3- carbonitrile::US11066414, Compound 229	12	aid1805683	Gilead Sciences, Inc.	124181009
1058808	InChI=1S/C34H37Cl2N9/c1-21-27(9-6-12-38-21)33(30-20-45(43-42-30)26-10-13-44(14-11-26)34(2,3)4)41-25-16-28-31(40-24-8-5-7-23(35)15-24)22(18-37)19-39-32(28)29(36)17-25/h5-9,12,15-17,19-20,26,33,41-43H,10-11,13-14H2,1-4H3,(H,39,40)/t33-/m0/s1	(S)-6-(((1-(1-(tert-butyl)piperidin- 4-yl)-1H-1,2,3-triazol-4-yl)(2- methylpyridin-3-yl)methyl)amino)- 8-chloro-4-((3- chlorophenyl)amino)quinoline-3- carbonitrile::US11066414, Compound 226	8	aid1805683	Gilead Sciences, Inc.	124181006
1058807	InChI=1S/C28H26Cl2N8/c1-16(2)38-15-25(36-37-38)28(22-8-5-9-32-17(22)3)35-21-11-23-26(34-20-7-4-6-19(29)10-20)18(13-31)14-33-27(23)24(30)12-21/h4-12,14-16,28,35-37H,1-3H3,(H,33,34)/t28-/m0/s1	(S)-8-chloro-4-((3- chlorophenyl)amino)-6-(((1- isopropyl-1H-1,2,3-triazol-4- yl)(2-methylpyridin-3- yl)methyl)amino)quinoline-3- carbonitrile::US11066414, Compound 225	10	aid1805683	Gilead Sciences, Inc.	124181005
1058806	InChI=1S/C25H20Cl2N8/c1-14-19(6-3-7-29-14)25(22-13-31-35-34-22)33-18-9-20-23(32-17-5-2-4-16(26)8-17)15(11-28)12-30-24(20)21(27)10-18/h2-10,12-13,25,31,33-35H,1H3,(H,30,32)/t25-/m0/s1	(S)-8-chloro-4-((3- chlorophenyl)amino)-6-(((2- methylpyridin-3-yl)(1H-1,2,3- triazol-4-yl)methyl)amino)- quinoline-3-carbonitrile::US11066414, Compound 224	12	aid1805683	Gilead Sciences, Inc.	124181004
1058805	InChI=1S/C38H41Cl3FN9OS/c1-38(2,3)50-10-6-23(7-11-50)51-16-31(47-48-51)37(27-20-53-32-17-49(9-8-25(27)32)24-18-52-19-24)45-22-12-26-35(21(14-43)15-44-36(26)29(40)13-22)46-30-5-4-28(39)33(41)34(30)42/h4-5,12-13,15-16,20,23-24,37,45,47-48H,6-11,17-19H2,1-3H3,(H,44,46)/t37-/m0/s1	(S)-6-(((1-(1-(tert-butyl)piperidin-4- yl)-1H-1,2,3-triazol-4-yl)(6-(oxetan- 3-yl)-4,5,6,7-tetrahydrothieno[2,3- c]pyridin-3-yl)methyl)amino)-8- chloro-4-((3,4-dichloro-2- fluorophenyl)amino)quinoline-3- carbonitrile::US11066414, Compound 223	7	aid1805683	Gilead Sciences, Inc.	124181003
1058803	InChI=1S/C37H44ClN9/c1-6-32(25-11-8-7-9-12-25)43-34-26(21-39)22-41-35-30(34)19-27(20-31(35)38)42-36(29-13-10-16-40-24(29)2)33-23-47(45-44-33)28-14-17-46(18-15-28)37(3,4)5/h7-13,16,19-20,22-23,28,32,36,42,44-45H,6,14-15,17-18H2,1-5H3,(H,41,43)/t32-,36+/m1/s1	6-(((S)-(1-(1-(tert-butyl)piperidin-4- yl)-1H-1,2,3-triazol-4-yl)(2- methylpyridin-3-yl)methyl)amino)- 8-chloro-4-(((R)-1- phenylpropyl)amino)quinoline-3- carbonitrile::US11066414, Compound 221	2	aid1805683	Gilead Sciences, Inc.	124181001
1058795	InChI=1S/C32H33ClN8/c1-2-28(21-9-4-3-5-10-21)38-30-23(17-34)19-36-32-26(30)15-24(16-27(32)33)37-31(22-11-8-14-35-18-22)29-20-41(40-39-29)25-12-6-7-13-25/h3-5,8-11,14-16,18-20,25,28,31,37,39-40H,2,6-7,12-13H2,1H3,(H,36,38)/t28-,31+/m1/s1	8-chloro-6-(((S)-(1-cyclopentyl-1H- 1,2,3-triazol-4-yl)(pyridin-3- yl)methyl)amino)-4-(((R)-1- phenylpropyl)amino)quinoline-3- carbonitrile::US11066414, Compound 213	3	aid1805683	Gilead Sciences, Inc.	124180991
1058792	InChI=1S/C27H23Cl3FN7O2/c28-19-1-2-21(24(31)23(19)30)35-25-15(9-32)10-33-27-18(25)7-16(8-20(27)29)34-26(14-3-5-39-6-4-14)22-11-38(37-36-22)17-12-40-13-17/h1-3,7-8,10-11,17,26,34,36-37H,4-6,12-13H2,(H,33,35)/t26-/m0/s1	(S)-8-chloro-4-((3,4-dichloro-2- fluorophenyl)amino)-6-(((3,6-dihydro- 2H-pyran-4-yl)(1-(oxetan-3-yl)-1H- 1,2,3-triazol-4- yl)methyl)amino)quinoline-3- carbonitrile::US11066414, Compound 210	10	aid1805683	Gilead Sciences, Inc.	124180988
1058789	InChI=1S/C23H16ClF2N9/c24-17-5-14(32-21(19-11-31-35-34-19)12-2-1-3-28-8-12)4-16-20(13(7-27)9-29-22(16)17)33-15-6-18(25)23(26)30-10-15/h1-6,8-11,21,31-32,34-35H,(H,29,33)/t21-/m0/s1	(S)-8-chloro-4-((5,6-difluoropyridin-3- yl)amino)-6-((pyridin-3-yl(1H-1,2,3- triazol-4-yl)methyl)amino)quinoline-3- carbonitrile::US11066414, Compound 207	5	aid1805683	Gilead Sciences, Inc.	124180983
1058782	InChI=1S/C30H29ClF2N10/c31-24-12-21(11-23-27(20(14-34)16-36-29(23)24)39-22-13-25(32)30(33)37-17-22)38-28(19-5-3-6-35-15-19)26-18-43(41-40-26)10-4-9-42-7-1-2-8-42/h3,5-6,11-13,15-18,28,38,40-41H,1-2,4,7-10H2,(H,36,39)/t28-/m0/s1	(S)-8-chloro-4-((5,6-difluoropyridin- 3-yl)amino)-6-((pyridin-3-yl(1-(3- (pyrrolidin-1-yl)propyl)-1H-1,2,3- triazol-4-yl)methyl)amino)quinoline- 3-carbonitrile::US11066414, Compound 200	7	aid1805683	Gilead Sciences, Inc.	124180977
1058778	InChI=1S/C27H22Cl2N8O/c28-18-4-1-5-19(7-18)33-25-17(10-30)12-32-27-22(25)8-20(9-23(27)29)34-26(16-3-2-6-31-11-16)24-13-37(36-35-24)21-14-38-15-21/h1-9,11-13,21,26,34-36H,14-15H2,(H,32,33)/t26-/m0/s1	(S)-8-chloro-4-((3- chlorophenyl)amino)-6-(((1-(oxetan- 3-yl)-1H-1,2,3-triazol-4-yl)(pyridin- 3-yl)methyl)amino)quinoline-3- carbonitrile::US11066414, Compound 196	6	aid1805683	Gilead Sciences, Inc.	124180974
1058775	InChI=1S/C30H31ClN8/c1-4-26(20-9-6-5-7-10-20)36-28-22(15-32)17-34-30-24(28)13-23(14-25(30)31)35-29(21-11-8-12-33-16-21)27-18-39(19(2)3)38-37-27/h5-14,16-19,26,29,35,37-38H,4H2,1-3H3,(H,34,36)/t26-,29+/m1/s1	8-chloro-6-(((S)-(1-isopropyl-1H- 1,2,3-triazol-4-yl)(pyridin-3- yl)methyl)amino)-4-(((R)-1-phenyl propyl)amino)quinoline-3- carbonitrile::US11066414, Compound 193	2	aid1805683	Gilead Sciences, Inc.	124180972
1058774	InChI=1S/C31H33ClN8/c1-5-26(20-10-7-6-8-11-20)37-28-22(16-33)18-35-30-24(28)14-23(15-25(30)32)36-29(21-12-9-13-34-17-21)27-19-40(39-38-27)31(2,3)4/h6-15,17-19,26,29,36,38-39H,5H2,1-4H3,(H,35,37)/t26-,29+/m1/s1	6-(((S)-(1-(tert-butyl)-1H-1,2,3-triazol- 4-yl)(pyridin-3-yl)methyl)amino)-8- chloro-4-(((R)-1- phenylpropyl)arnino)quinoline-3- carbonitrile::US11066414, Compound 192	3	aid1805683	Gilead Sciences, Inc.	124180971
1058777	InChI=1S/C29H26ClF3N8/c1-2-24(18-7-4-3-5-8-18)38-26-20(13-34)15-36-28-22(26)11-21(12-23(28)30)37-27(19-9-6-10-35-14-19)25-16-41(40-39-25)17-29(31,32)33/h3-12,14-16,24,27,37,39-40H,2,17H2,1H3,(H,36,38)/t24-,27+/m1/s1	8-chloro-4-(((R)-1-phenyl propyl)amino)-6-(((S)-pyridin-3- yl(1-(2,2,2-trifluoroethyl)-1H- 1,2,3-triazol-4- yl)methyl)amino)quinoline-3- carbonitrile::US11066414, Compound 195	4	aid1805683	Gilead Sciences, Inc.	124180970
1058776	InChI=1S/C30H29ClN8O/c1-2-26(19-7-4-3-5-8-19)36-28-21(13-32)15-34-30-24(28)11-22(12-25(30)31)35-29(20-9-6-10-33-14-20)27-16-39(38-37-27)23-17-40-18-23/h3-12,14-16,23,26,29,35,37-38H,2,17-18H2,1H3,(H,34,36)/t26-,29+/m1/s1	8-chloro-6-(((S)-(1-(oxetan-3-yl)-1H- 1,2,3-triazol-4-yl)(pyridin-3- yl)methyl)amino)-4-(((R)-1-phenyl propyl)amino)quinoline-3- carbonitrile::US11066414, Compound 194	2	aid1805683	Gilead Sciences, Inc.	124180969
1058763	InChI=1S/C30H30ClFN8/c1-3-26(20-8-5-4-6-9-20)37-28-22(15-33)17-35-30-24(28)12-23(13-25(30)31)36-29(21-10-7-11-34-16-21)27-18-40(39-38-27)19(2)14-32/h4-13,16-19,26,29,36,38-39H,3,14H2,1-2H3,(H,35,37)/t19-,26+,29-/m0/s1	8-chloro-6-(((S)-(1-((S)-1- fluoropropan-2-yl)-1H-1,2,3- triazol-4-yl)(pyridin-3- yl)methyl)amino)-4-(((R)-1- phenylpropyl)amino)quinoline-3- carbonitrile::US11066414, Compound 181	2	aid1805683	Gilead Sciences, Inc.	124180962
1058758	InChI=1S/C34H38ClN9/c1-2-30(24-10-4-3-5-11-24)40-32-26(20-36)22-38-34-28(32)18-27(19-29(34)35)39-33(25-12-8-13-37-21-25)31-23-44(42-41-31)17-9-16-43-14-6-7-15-43/h3-5,8,10-13,18-19,21-23,30,33,39,41-42H,2,6-7,9,14-17H2,1H3,(H,38,40)/t30-,33+/m1/s1	8-chloro-4-(((R)-1- phenylpropyl)amino)-6-(((S)-pyridin-3- yl(1-(3-(pyrrolidin-1-yl)propyl)-1H- 1,2,3-triazol-4- yl)methyl)amino)quinoline-3- carbonitrile::US11066414, Compound 176	2	aid1805683	Gilead Sciences, Inc.	124180956
1058762	InChI=1S/C32H32ClN9/c1-2-27(19-7-4-3-5-8-19)39-29-21(13-34)15-37-31-23(29)11-22(12-26(31)33)38-30(20-9-6-10-35-14-20)28-18-42(41-40-28)32-24-16-36-17-25(24)32/h3-12,14-15,18,24-25,27,30,32,36,38,40-41H,2,16-17H2,1H3,(H,37,39)/t24-,25+,27-,30+,32?/m1/s1	6-(((S)-(1-(($#8226; R,5S,6s)-3- azabicyclo[3.1 0]hexan-6-yl)- 1H-1,2,3-triazol-4-yl)(pyridin- 3-yl)methyl)amino)-8-chloro- 4-(((R)-1-phenyl propyl)amino)- quinoline-3-carbonitrile::US11066414, Compound 180	1	aid1805683	Gilead Sciences, Inc.	124180954
1058754	InChI=1S/C27H22ClF2N9O/c1-14-19(3-2-4-32-14)26(23-11-39(38-37-23)18-12-40-13-18)35-16-5-20-24(36-17-7-22(29)27(30)34-10-17)15(8-31)9-33-25(20)21(28)6-16/h2-7,9-11,18,26,35,37-38H,12-13H2,1H3,(H,33,36)/t26-/m0/s1	(S)-8-chloro-4-((5,6-difluoropyridin-3- yl)amino)-6-(((2-methylpyridin-3- yl)(1-(oxetan-3-yl)-1H-1,2,3-triazol- 4-yl)methyl)amino)quinoline-3- carbonitrile::US11066414, Compound 172	10	aid1805683	Gilead Sciences, Inc.	124180952
[truncated: 28 more rows]

## Sheet: S2
index	name	tanimoto_morgan	dice_morgan	tanimoto_maccs	dice_maccs				Similarity Geater than or equal 0.5
0	erlotinib	1	1	1	1
index	name	tanimoto_morgan	dice_morgan	tanimoto_maccs	dice_maccs
[truncated: 565 more rows]

## Sheet: S3
MLR model using the entire dataset of 225 compounds
[truncated: 226 more rows]

[truncated: 3 more sheets: S4, S5, S6]
